# Supplementary material for: The potential protective role of peripheral immunophenotypes in Alzheimer’s disease: a Mendelian randomization study
Source: Front Aging Neurosci. 2024 Jun 5;16:1403077. doi: 10.3389/fnagi.2024.1403077 (PMC11188398; doi:10.3389/fnagi.2024.1403077)
Supplement: Supplementary file 1 [file Table_1.xlsx]

## Sheet: Supplementary Table 1
The detailed characteristics of the instrumental SNPs associated with 731 immune traits used in this study derived from European Alzheimer’s and Dementia Biobank (EADB).
SNP	effect_allele.exposure	other_allele.exposure	effect_allele.outcome	other_allele.outcome	beta.exposure	beta.outcome	eaf.exposure	eaf.outcome	remove	palindromic	ambiguous	id.outcome	pval.outcome	chr.outcome	pos.outcome	se.outcome	ncontrol.outcome	outcome	mr_keep.outcome	pval_origin.outcome	samplesize.exposure	pval.exposure	chr.exposure	pos.exposure	se.exposure	id.exposure	exposure	mr_keep.exposure	pval_origin.exposure	data_source.exposure	action	mr_keep	samplesize.outcome
rs35161722	T	C	T	C	-0.498	0.0373	0.0232	NA	FALSE	FALSE	FALSE	zGihqB	0.398	1	160514010	0.0442	400497	ad	TRUE	reported	3410	5.69e-09	1	160483800	0.08527	ebi-a-GCST90001474	Plasmacytoid Dendritic Cell %Dendritic Cell	TRUE	reported	igd	2	TRUE	NA
rs876036	C	T	C	T	-0.1835	0.0261	0.2645	NA	FALSE	FALSE	FALSE	zGihqB	0.00252	7	50268114	0.0086	401577	ad	TRUE	reported	3410	2.25e-10	7	50307710	0.02885	ebi-a-GCST90001474	Plasmacytoid Dendritic Cell %Dendritic Cell	TRUE	reported	igd	2	TRUE	NA
rs35161722	T	C	T	C	-0.498	0.0373	0.0232	NA	FALSE	FALSE	FALSE	zGihqB	0.398	1	160514010	0.0442	400497	ad	TRUE	reported	3410	5.69e-09	1	160483800	0.08527	ebi-a-GCST90001474	Plasmacytoid Dendritic Cell %Dendritic Cell	TRUE	reported	igd	2	TRUE	NA
rs876036	C	T	C	T	-0.1835	0.0261	0.2645	NA	FALSE	FALSE	FALSE	zGihqB	0.00252	7	50268114	0.0086	401577	ad	TRUE	reported	3410	2.25e-10	7	50307710	0.02885	ebi-a-GCST90001474	Plasmacytoid Dendritic Cell %Dendritic Cell	TRUE	reported	igd	2	TRUE	NA
rs3749936	T	G	T	G	-0.2418	-0.004	0.2808	NA	FALSE	FALSE	FALSE	kvMX0F	0.7832	6	31439424	0.0145	401577	ad	TRUE	reported	31407201	6.55e-11	3595	6	0.03691	ebi-a-GCST90001475	HLA DR++ monocyte %monocyte	TRUE	reported	igd	2	TRUE	NA
rs9271281	T	C	T	C	-0.3029	0.024	0.5808	NA	FALSE	FALSE	FALSE	kvMX0F	0.004092	6	32613282	0.0084	394472	ad	TRUE	reported	32581059	5.37e-23	3595	6	0.03046	ebi-a-GCST90001475	HLA DR++ monocyte %monocyte	TRUE	reported	igd	2	TRUE	NA
rs9296042	T	C	T	C	-0.1923	0.0179	0.5013	NA	FALSE	FALSE	FALSE	kvMX0F	0.03137	6	32768228	0.0083	400902	ad	TRUE	reported	32736005	5.86e-11	3595	6	0.02928	ebi-a-GCST90001475	HLA DR++ monocyte %monocyte	TRUE	reported	igd	2	TRUE	NA
rs3749936	T	G	T	G	-0.2418	-0.004	0.2808	NA	FALSE	FALSE	FALSE	kvMX0F	0.7832	6	31439424	0.0145	401577	ad	TRUE	reported	31407201	6.55e-11	3595	6	0.03691	ebi-a-GCST90001475	HLA DR++ monocyte %monocyte	TRUE	reported	igd	2	TRUE	NA
rs9271281	T	C	T	C	-0.3029	0.024	0.5808	NA	FALSE	FALSE	FALSE	kvMX0F	0.004092	6	32613282	0.0084	394472	ad	TRUE	reported	32581059	5.37e-23	3595	6	0.03046	ebi-a-GCST90001475	HLA DR++ monocyte %monocyte	TRUE	reported	igd	2	TRUE	NA
rs9296042	T	C	T	C	-0.1923	0.0179	0.5013	NA	FALSE	FALSE	FALSE	kvMX0F	0.03137	6	32768228	0.0083	400902	ad	TRUE	reported	32736005	5.86e-11	3595	6	0.02928	ebi-a-GCST90001475	HLA DR++ monocyte %monocyte	TRUE	reported	igd	2	TRUE	NA
rs11579717	A	G	A	G	1.864	0.0488	0.0044	NA	FALSE	FALSE	FALSE	uwXrm8	0.01611	1	200029993	0.0203	401577	ad	TRUE	reported	3.37e-28	199999121	1	3437	0.1678	ebi-a-GCST90001481	Resting CD4 regulatory T cell %CD4 regulatory T cell	TRUE	reported	igd	2	TRUE	NA
rs116794175	C	T	C	T	1.414	0.041	0.0042	NA	FALSE	FALSE	FALSE	uwXrm8	0.5731	1	194041078	0.0728	386481	ad	TRUE	reported	7.86e-16	194010208	1	3437	0.1747	ebi-a-GCST90001481	Resting CD4 regulatory T cell %CD4 regulatory T cell	TRUE	reported	igd	2	TRUE	NA
rs12133465	G	A	G	A	0.7179	0.0077	0.0096	NA	FALSE	FALSE	FALSE	uwXrm8	0.7466	1	195461206	0.0239	401577	ad	TRUE	reported	6.33e-10	195430336	1	3437	0.1158	ebi-a-GCST90001481	Resting CD4 regulatory T cell %CD4 regulatory T cell	TRUE	reported	igd	2	TRUE	NA
rs138915779	A	C	A	C	1.793	0.0334	0.0035	NA	FALSE	FALSE	FALSE	uwXrm8	0.2641	1	190110040	0.0299	401172	ad	TRUE	reported	4.93e-18	190079170	1	3437	0.2061	ebi-a-GCST90001481	Resting CD4 regulatory T cell %CD4 regulatory T cell	TRUE	reported	igd	2	TRUE	NA
rs140372175	C	A	C	A	1.87	0.0564	0.0044	NA	FALSE	FALSE	FALSE	uwXrm8	0.1004	1	199309772	0.0343	401172	ad	TRUE	reported	6.08e-28	199278900	1	3437	0.1692	ebi-a-GCST90001481	Resting CD4 regulatory T cell %CD4 regulatory T cell	TRUE	reported	igd	2	TRUE	NA
rs146899923	C	T	C	T	0.7278	0.0481	0.0089	NA	FALSE	FALSE	FALSE	uwXrm8	0.1254	1	195950719	0.0314	400497	ad	TRUE	reported	7.08e-09	195919849	1	3437	0.1254	ebi-a-GCST90001481	Resting CD4 regulatory T cell %CD4 regulatory T cell	TRUE	reported	igd	2	TRUE	NA
rs147071297	A	G	A	G	1.292	0.0643	0.0039	NA	FALSE	FALSE	FALSE	uwXrm8	0.03495	1	191679470	0.0305	401172	ad	TRUE	reported	6.14e-13	191648600	1	3437	0.1788	ebi-a-GCST90001481	Resting CD4 regulatory T cell %CD4 regulatory T cell	TRUE	reported	igd	2	TRUE	NA
rs17027464	A	T	A	T	0.1826	0.0177	0.1986	NA	FALSE	TRUE	TRUE	uwXrm8	0.226	2	41319202	0.0147	401577	ad	TRUE	reported	9.03e-10	41546342	2	3437	0.02972	ebi-a-GCST90001481	Resting CD4 regulatory T cell %CD4 regulatory T cell	TRUE	reported	igd	2	FALSE	NA
rs17583875	A	G	A	G	2.714	0.0141	0.0029	NA	FALSE	FALSE	FALSE	uwXrm8	0.6304	1	197955640	0.0293	400497	ad	TRUE	reported	3.22e-40	197924770	1	3437	0.2018	ebi-a-GCST90001481	Resting CD4 regulatory T cell %CD4 regulatory T cell	TRUE	reported	igd	2	TRUE	NA
rs187089343	C	A	C	A	0.9806	-0.006	0.0047	NA	FALSE	FALSE	FALSE	uwXrm8	0.9293	1	182122403	0.0676	397326	ad	TRUE	reported	1e-08	182091538	1	3437	0.1707	ebi-a-GCST90001481	Resting CD4 regulatory T cell %CD4 regulatory T cell	TRUE	reported	igd	2	TRUE	NA
rs191753228	T	C	T	C	2.342	0.0148	0.0041	NA	FALSE	FALSE	FALSE	uwXrm8	0.5969	1	196352038	0.0279	394472	ad	TRUE	reported	4.4e-32	196321168	1	3437	0.1966	ebi-a-GCST90001481	Resting CD4 regulatory T cell %CD4 regulatory T cell	TRUE	reported	igd	2	TRUE	NA
rs413431	G	A	G	A	-0.2777	-0.0198	0.8154	NA	FALSE	FALSE	FALSE	uwXrm8	0.1555	2	38949554	0.0139	401577	ad	TRUE	reported	1.47e-20	39176695	2	3437	0.02969	ebi-a-GCST90001481	Resting CD4 regulatory T cell %CD4 regulatory T cell	TRUE	reported	igd	2	TRUE	NA
rs60220946	T	C	T	C	0.4297	0.0493	0.0212	NA	FALSE	FALSE	FALSE	uwXrm8	0.1232	1	193536495	0.032	401172	ad	TRUE	reported	3.08e-08	193505625	1	3437	0.07742	ebi-a-GCST90001481	Resting CD4 regulatory T cell %CD4 regulatory T cell	TRUE	reported	igd	2	TRUE	NA
rs61836370	G	A	G	A	0.5904	0.014	0.0145	NA	FALSE	FALSE	FALSE	uwXrm8	0.4286	1	188722338	0.0177	401577	ad	TRUE	reported	5.37e-10	188691469	1	3437	0.09484	ebi-a-GCST90001481	Resting CD4 regulatory T cell %CD4 regulatory T cell	TRUE	reported	igd	2	TRUE	NA
rs6751481	C	T	C	T	0.2946	0.0042	0.4709	NA	FALSE	FALSE	FALSE	uwXrm8	0.6083	2	38670668	0.0083	401577	ad	TRUE	reported	3.4e-38	38897810	2	3437	0.02252	ebi-a-GCST90001481	Resting CD4 regulatory T cell %CD4 regulatory T cell	TRUE	reported	igd	2	TRUE	NA
rs7530076	A	G	A	G	-0.463	0.0372	0.9748	NA	FALSE	FALSE	FALSE	uwXrm8	0.1262	1	195856146	0.0243	395471	ad	TRUE	reported	5.95e-10	195825276	1	3437	0.07456	ebi-a-GCST90001481	Resting CD4 regulatory T cell %CD4 regulatory T cell	TRUE	reported	igd	2	TRUE	NA
rs11579717	A	G	A	G	1.864	0.0488	0.0044	NA	FALSE	FALSE	FALSE	uwXrm8	0.01611	1	200029993	0.0203	401577	ad	TRUE	reported	3.37e-28	199999121	1	3437	0.1678	ebi-a-GCST90001481	Resting CD4 regulatory T cell %CD4 regulatory T cell	TRUE	reported	igd	2	TRUE	NA
rs116794175	C	T	C	T	1.414	0.041	0.0042	NA	FALSE	FALSE	FALSE	uwXrm8	0.5731	1	194041078	0.0728	386481	ad	TRUE	reported	7.86e-16	194010208	1	3437	0.1747	ebi-a-GCST90001481	Resting CD4 regulatory T cell %CD4 regulatory T cell	TRUE	reported	igd	2	TRUE	NA
rs12133465	G	A	G	A	0.7179	0.0077	0.0096	NA	FALSE	FALSE	FALSE	uwXrm8	0.7466	1	195461206	0.0239	401577	ad	TRUE	reported	6.33e-10	195430336	1	3437	0.1158	ebi-a-GCST90001481	Resting CD4 regulatory T cell %CD4 regulatory T cell	TRUE	reported	igd	2	TRUE	NA
rs138915779	A	C	A	C	1.793	0.0334	0.0035	NA	FALSE	FALSE	FALSE	uwXrm8	0.2641	1	190110040	0.0299	401172	ad	TRUE	reported	4.93e-18	190079170	1	3437	0.2061	ebi-a-GCST90001481	Resting CD4 regulatory T cell %CD4 regulatory T cell	TRUE	reported	igd	2	TRUE	NA
rs140372175	C	A	C	A	1.87	0.0564	0.0044	NA	FALSE	FALSE	FALSE	uwXrm8	0.1004	1	199309772	0.0343	401172	ad	TRUE	reported	6.08e-28	199278900	1	3437	0.1692	ebi-a-GCST90001481	Resting CD4 regulatory T cell %CD4 regulatory T cell	TRUE	reported	igd	2	TRUE	NA
rs146899923	C	T	C	T	0.7278	0.0481	0.0089	NA	FALSE	FALSE	FALSE	uwXrm8	0.1254	1	195950719	0.0314	400497	ad	TRUE	reported	7.08e-09	195919849	1	3437	0.1254	ebi-a-GCST90001481	Resting CD4 regulatory T cell %CD4 regulatory T cell	TRUE	reported	igd	2	TRUE	NA
rs147071297	A	G	A	G	1.292	0.0643	0.0039	NA	FALSE	FALSE	FALSE	uwXrm8	0.03495	1	191679470	0.0305	401172	ad	TRUE	reported	6.14e-13	191648600	1	3437	0.1788	ebi-a-GCST90001481	Resting CD4 regulatory T cell %CD4 regulatory T cell	TRUE	reported	igd	2	TRUE	NA
rs17027464	A	T	A	T	0.1826	0.0177	0.1986	NA	FALSE	TRUE	TRUE	uwXrm8	0.226	2	41319202	0.0147	401577	ad	TRUE	reported	9.03e-10	41546342	2	3437	0.02972	ebi-a-GCST90001481	Resting CD4 regulatory T cell %CD4 regulatory T cell	TRUE	reported	igd	2	FALSE	NA
rs17583875	A	G	A	G	2.714	0.0141	0.0029	NA	FALSE	FALSE	FALSE	uwXrm8	0.6304	1	197955640	0.0293	400497	ad	TRUE	reported	3.22e-40	197924770	1	3437	0.2018	ebi-a-GCST90001481	Resting CD4 regulatory T cell %CD4 regulatory T cell	TRUE	reported	igd	2	TRUE	NA
rs187089343	C	A	C	A	0.9806	-0.006	0.0047	NA	FALSE	FALSE	FALSE	uwXrm8	0.9293	1	182122403	0.0676	397326	ad	TRUE	reported	1e-08	182091538	1	3437	0.1707	ebi-a-GCST90001481	Resting CD4 regulatory T cell %CD4 regulatory T cell	TRUE	reported	igd	2	TRUE	NA
rs191753228	T	C	T	C	2.342	0.0148	0.0041	NA	FALSE	FALSE	FALSE	uwXrm8	0.5969	1	196352038	0.0279	394472	ad	TRUE	reported	4.4e-32	196321168	1	3437	0.1966	ebi-a-GCST90001481	Resting CD4 regulatory T cell %CD4 regulatory T cell	TRUE	reported	igd	2	TRUE	NA
rs413431	G	A	G	A	-0.2777	-0.0198	0.8154	NA	FALSE	FALSE	FALSE	uwXrm8	0.1555	2	38949554	0.0139	401577	ad	TRUE	reported	1.47e-20	39176695	2	3437	0.02969	ebi-a-GCST90001481	Resting CD4 regulatory T cell %CD4 regulatory T cell	TRUE	reported	igd	2	TRUE	NA
rs60220946	T	C	T	C	0.4297	0.0493	0.0212	NA	FALSE	FALSE	FALSE	uwXrm8	0.1232	1	193536495	0.032	401172	ad	TRUE	reported	3.08e-08	193505625	1	3437	0.07742	ebi-a-GCST90001481	Resting CD4 regulatory T cell %CD4 regulatory T cell	TRUE	reported	igd	2	TRUE	NA
rs61836370	G	A	G	A	0.5904	0.014	0.0145	NA	FALSE	FALSE	FALSE	uwXrm8	0.4286	1	188722338	0.0177	401577	ad	TRUE	reported	5.37e-10	188691469	1	3437	0.09484	ebi-a-GCST90001481	Resting CD4 regulatory T cell %CD4 regulatory T cell	TRUE	reported	igd	2	TRUE	NA
rs6751481	C	T	C	T	0.2946	0.0042	0.4709	NA	FALSE	FALSE	FALSE	uwXrm8	0.6083	2	38670668	0.0083	401577	ad	TRUE	reported	3.4e-38	38897810	2	3437	0.02252	ebi-a-GCST90001481	Resting CD4 regulatory T cell %CD4 regulatory T cell	TRUE	reported	igd	2	TRUE	NA
rs7530076	A	G	A	G	-0.463	0.0372	0.9748	NA	FALSE	FALSE	FALSE	uwXrm8	0.1262	1	195856146	0.0243	395471	ad	TRUE	reported	5.95e-10	195825276	1	3437	0.07456	ebi-a-GCST90001481	Resting CD4 regulatory T cell %CD4 regulatory T cell	TRUE	reported	igd	2	TRUE	NA
rs11579717	A	G	A	G	1.52	0.0488	0.0044	NA	FALSE	FALSE	FALSE	BP9Uz5	0.01611	1	200029993	0.0203	401577	ad	TRUE	reported	1	199999121	0.1739	3437	3.57e-18	ebi-a-GCST90001482	Resting CD4 regulatory T cell %CD4+ T cell	TRUE	reported	igd	2	TRUE	NA
rs116794175	C	T	C	T	1.18	0.041	0.0042	NA	FALSE	FALSE	FALSE	BP9Uz5	0.5731	1	194041078	0.0728	386481	ad	TRUE	reported	1	194010208	0.1802	3437	6.76e-11	ebi-a-GCST90001482	Resting CD4 regulatory T cell %CD4+ T cell	TRUE	reported	igd	2	TRUE	NA
rs138915779	A	C	A	C	1.439	0.0334	0.0035	NA	FALSE	FALSE	FALSE	BP9Uz5	0.2641	1	190110040	0.0299	401172	ad	TRUE	reported	1	190079170	0.2131	3437	1.72e-11	ebi-a-GCST90001482	Resting CD4 regulatory T cell %CD4+ T cell	TRUE	reported	igd	2	TRUE	NA
rs140372175	C	A	C	A	1.503	0.0564	0.0044	NA	FALSE	FALSE	FALSE	BP9Uz5	0.1004	1	199309772	0.0343	401172	ad	TRUE	reported	1	199278900	0.1752	3437	1.42e-17	ebi-a-GCST90001482	Resting CD4 regulatory T cell %CD4+ T cell	TRUE	reported	igd	2	TRUE	NA
rs147071297	A	G	A	G	1.123	0.0643	0.0039	NA	FALSE	FALSE	FALSE	BP9Uz5	0.03495	1	191679470	0.0305	401172	ad	TRUE	reported	1	191648600	0.1849	3437	1.4e-09	ebi-a-GCST90001482	Resting CD4 regulatory T cell %CD4+ T cell	TRUE	reported	igd	2	TRUE	NA
rs17583875	A	G	A	G	2.309	0.0141	0.0029	NA	FALSE	FALSE	FALSE	BP9Uz5	0.6304	1	197955640	0.0293	400497	ad	TRUE	reported	1	197924770	0.2094	3437	8.26e-28	ebi-a-GCST90001482	Resting CD4 regulatory T cell %CD4+ T cell	TRUE	reported	igd	2	TRUE	NA
rs191753228	T	C	T	C	1.97	0.0148	0.0041	NA	FALSE	FALSE	FALSE	BP9Uz5	0.5969	1	196352038	0.0279	394472	ad	TRUE	reported	1	196321168	0.2041	3437	9.2e-22	ebi-a-GCST90001482	Resting CD4 regulatory T cell %CD4+ T cell	TRUE	reported	igd	2	TRUE	NA
rs408686	A	C	A	C	-0.2655	-0.0258	0.8142	NA	FALSE	FALSE	FALSE	BP9Uz5	0.07182	2	38950179	0.0144	401577	ad	TRUE	reported	2	39177320	0.03044	3437	4.22e-18	ebi-a-GCST90001482	Resting CD4 regulatory T cell %CD4+ T cell	TRUE	reported	igd	2	TRUE	NA
rs61836370	G	A	G	A	0.6008	0.014	0.0145	NA	FALSE	FALSE	FALSE	BP9Uz5	0.4286	1	188722338	0.0177	401577	ad	TRUE	reported	1	188691469	0.0978	3437	9.02e-10	ebi-a-GCST90001482	Resting CD4 regulatory T cell %CD4+ T cell	TRUE	reported	igd	2	TRUE	NA
rs6751481	C	T	C	T	0.2762	0.0042	0.4709	NA	FALSE	FALSE	FALSE	BP9Uz5	0.6083	2	38670668	0.0083	401577	ad	TRUE	reported	2	38897810	0.0232	3437	4.78e-32	ebi-a-GCST90001482	Resting CD4 regulatory T cell %CD4+ T cell	TRUE	reported	igd	2	TRUE	NA
rs11579717	A	G	A	G	1.52	0.0488	0.0044	NA	FALSE	FALSE	FALSE	BP9Uz5	0.01611	1	200029993	0.0203	401577	ad	TRUE	reported	1	199999121	0.1739	3437	3.57e-18	ebi-a-GCST90001482	Resting CD4 regulatory T cell %CD4+ T cell	TRUE	reported	igd	2	TRUE	NA
rs116794175	C	T	C	T	1.18	0.041	0.0042	NA	FALSE	FALSE	FALSE	BP9Uz5	0.5731	1	194041078	0.0728	386481	ad	TRUE	reported	1	194010208	0.1802	3437	6.76e-11	ebi-a-GCST90001482	Resting CD4 regulatory T cell %CD4+ T cell	TRUE	reported	igd	2	TRUE	NA
rs138915779	A	C	A	C	1.439	0.0334	0.0035	NA	FALSE	FALSE	FALSE	BP9Uz5	0.2641	1	190110040	0.0299	401172	ad	TRUE	reported	1	190079170	0.2131	3437	1.72e-11	ebi-a-GCST90001482	Resting CD4 regulatory T cell %CD4+ T cell	TRUE	reported	igd	2	TRUE	NA
rs140372175	C	A	C	A	1.503	0.0564	0.0044	NA	FALSE	FALSE	FALSE	BP9Uz5	0.1004	1	199309772	0.0343	401172	ad	TRUE	reported	1	199278900	0.1752	3437	1.42e-17	ebi-a-GCST90001482	Resting CD4 regulatory T cell %CD4+ T cell	TRUE	reported	igd	2	TRUE	NA
rs147071297	A	G	A	G	1.123	0.0643	0.0039	NA	FALSE	FALSE	FALSE	BP9Uz5	0.03495	1	191679470	0.0305	401172	ad	TRUE	reported	1	191648600	0.1849	3437	1.4e-09	ebi-a-GCST90001482	Resting CD4 regulatory T cell %CD4+ T cell	TRUE	reported	igd	2	TRUE	NA
rs17583875	A	G	A	G	2.309	0.0141	0.0029	NA	FALSE	FALSE	FALSE	BP9Uz5	0.6304	1	197955640	0.0293	400497	ad	TRUE	reported	1	197924770	0.2094	3437	8.26e-28	ebi-a-GCST90001482	Resting CD4 regulatory T cell %CD4+ T cell	TRUE	reported	igd	2	TRUE	NA
rs191753228	T	C	T	C	1.97	0.0148	0.0041	NA	FALSE	FALSE	FALSE	BP9Uz5	0.5969	1	196352038	0.0279	394472	ad	TRUE	reported	1	196321168	0.2041	3437	9.2e-22	ebi-a-GCST90001482	Resting CD4 regulatory T cell %CD4+ T cell	TRUE	reported	igd	2	TRUE	NA
rs408686	A	C	A	C	-0.2655	-0.0258	0.8142	NA	FALSE	FALSE	FALSE	BP9Uz5	0.07182	2	38950179	0.0144	401577	ad	TRUE	reported	2	39177320	0.03044	3437	4.22e-18	ebi-a-GCST90001482	Resting CD4 regulatory T cell %CD4+ T cell	TRUE	reported	igd	2	TRUE	NA
rs61836370	G	A	G	A	0.6008	0.014	0.0145	NA	FALSE	FALSE	FALSE	BP9Uz5	0.4286	1	188722338	0.0177	401577	ad	TRUE	reported	1	188691469	0.0978	3437	9.02e-10	ebi-a-GCST90001482	Resting CD4 regulatory T cell %CD4+ T cell	TRUE	reported	igd	2	TRUE	NA
rs6751481	C	T	C	T	0.2762	0.0042	0.4709	NA	FALSE	FALSE	FALSE	BP9Uz5	0.6083	2	38670668	0.0083	401577	ad	TRUE	reported	2	38897810	0.0232	3437	4.78e-32	ebi-a-GCST90001482	Resting CD4 regulatory T cell %CD4+ T cell	TRUE	reported	igd	2	TRUE	NA
rs113435341	G	A	G	A	-2.032	0.0595	0.0032	NA	FALSE	FALSE	FALSE	i4tRku	0.07244	1	198182558	0.0331	400497	ad	TRUE	reported	3405	8.69e-19	198151688	0.2282	1	ebi-a-GCST90001492	Secreting CD4 regulatory T cell Absolute Count	TRUE	reported	igd	2	TRUE	NA
rs11579717	A	G	A	G	-1.201	0.0488	0.0044	NA	FALSE	FALSE	FALSE	i4tRku	0.01611	1	200029993	0.0203	401577	ad	TRUE	reported	3405	5.94e-10	199999121	0.1934	1	ebi-a-GCST90001492	Secreting CD4 regulatory T cell Absolute Count	TRUE	reported	igd	2	TRUE	NA
rs138915779	A	C	A	C	-1.455	0.0334	0.0034	NA	FALSE	FALSE	FALSE	i4tRku	0.2641	1	190110040	0.0299	401172	ad	TRUE	reported	3405	9.4e-10	190079170	0.2371	1	ebi-a-GCST90001492	Secreting CD4 regulatory T cell Absolute Count	TRUE	reported	igd	2	TRUE	NA
rs140372175	C	A	C	A	-1.292	0.0564	0.0044	NA	FALSE	FALSE	FALSE	i4tRku	0.1004	1	199309772	0.0343	401172	ad	TRUE	reported	3405	3.77e-11	199278900	0.1947	1	ebi-a-GCST90001492	Secreting CD4 regulatory T cell Absolute Count	TRUE	reported	igd	2	TRUE	NA
rs191753228	T	C	T	C	-1.471	0.0148	0.0041	NA	FALSE	FALSE	FALSE	i4tRku	0.5969	1	196352038	0.0279	394472	ad	TRUE	reported	3405	1.16e-10	196321168	0.2275	1	ebi-a-GCST90001492	Secreting CD4 regulatory T cell Absolute Count	TRUE	reported	igd	2	TRUE	NA
rs61839660	T	C	T	C	0.3436	-0.0299	0.0542	NA	FALSE	FALSE	FALSE	i4tRku	0.03848	10	6052734	0.0144	401577	ad	TRUE	reported	3405	2.27e-09	6094697	0.05734	10	ebi-a-GCST90001492	Secreting CD4 regulatory T cell Absolute Count	TRUE	reported	igd	2	TRUE	NA
rs113435341	G	A	G	A	-2.032	0.0595	0.0032	NA	FALSE	FALSE	FALSE	i4tRku	0.07244	1	198182558	0.0331	400497	ad	TRUE	reported	3405	8.69e-19	198151688	0.2282	1	ebi-a-GCST90001492	Secreting CD4 regulatory T cell Absolute Count	TRUE	reported	igd	2	TRUE	NA
rs11579717	A	G	A	G	-1.201	0.0488	0.0044	NA	FALSE	FALSE	FALSE	i4tRku	0.01611	1	200029993	0.0203	401577	ad	TRUE	reported	3405	5.94e-10	199999121	0.1934	1	ebi-a-GCST90001492	Secreting CD4 regulatory T cell Absolute Count	TRUE	reported	igd	2	TRUE	NA
rs138915779	A	C	A	C	-1.455	0.0334	0.0034	NA	FALSE	FALSE	FALSE	i4tRku	0.2641	1	190110040	0.0299	401172	ad	TRUE	reported	3405	9.4e-10	190079170	0.2371	1	ebi-a-GCST90001492	Secreting CD4 regulatory T cell Absolute Count	TRUE	reported	igd	2	TRUE	NA
rs140372175	C	A	C	A	-1.292	0.0564	0.0044	NA	FALSE	FALSE	FALSE	i4tRku	0.1004	1	199309772	0.0343	401172	ad	TRUE	reported	3405	3.77e-11	199278900	0.1947	1	ebi-a-GCST90001492	Secreting CD4 regulatory T cell Absolute Count	TRUE	reported	igd	2	TRUE	NA
rs191753228	T	C	T	C	-1.471	0.0148	0.0041	NA	FALSE	FALSE	FALSE	i4tRku	0.5969	1	196352038	0.0279	394472	ad	TRUE	reported	3405	1.16e-10	196321168	0.2275	1	ebi-a-GCST90001492	Secreting CD4 regulatory T cell Absolute Count	TRUE	reported	igd	2	TRUE	NA
rs61839660	T	C	T	C	0.3436	-0.0299	0.0542	NA	FALSE	FALSE	FALSE	i4tRku	0.03848	10	6052734	0.0144	401577	ad	TRUE	reported	3405	2.27e-09	6094697	0.05734	10	ebi-a-GCST90001492	Secreting CD4 regulatory T cell Absolute Count	TRUE	reported	igd	2	TRUE	NA
rs113435341	G	A	G	A	-2.54	0.0595	0.0032	NA	FALSE	FALSE	FALSE	9KAEGD	0.07244	1	198182558	0.0331	400497	ad	TRUE	reported	3437	198151688	0.2093	3.14e-33	1	ebi-a-GCST90001493	Secreting CD4 regulatory T cell %CD4 regulatory T cell	TRUE	reported	igd	2	TRUE	NA
rs11579717	A	G	A	G	-1.776	0.0488	0.0044	NA	FALSE	FALSE	FALSE	9KAEGD	0.01611	1	200029993	0.0203	401577	ad	TRUE	reported	3437	199999121	0.1774	2.93e-23	1	ebi-a-GCST90001493	Secreting CD4 regulatory T cell %CD4 regulatory T cell	TRUE	reported	igd	2	TRUE	NA
rs116794175	C	T	C	T	-1.417	0.041	0.0042	NA	FALSE	FALSE	FALSE	9KAEGD	0.5731	1	194041078	0.0728	386481	ad	TRUE	reported	3437	194010208	0.1841	1.78e-14	1	ebi-a-GCST90001493	Secreting CD4 regulatory T cell %CD4 regulatory T cell	TRUE	reported	igd	2	TRUE	NA
rs138915779	A	C	A	C	-1.535	0.0334	0.0035	NA	FALSE	FALSE	FALSE	9KAEGD	0.2641	1	190110040	0.0299	401172	ad	TRUE	reported	3437	190079170	0.2181	2.39e-12	1	ebi-a-GCST90001493	Secreting CD4 regulatory T cell %CD4 regulatory T cell	TRUE	reported	igd	2	TRUE	NA
rs140372175	C	A	C	A	-1.824	0.0564	0.0044	NA	FALSE	FALSE	FALSE	9KAEGD	0.1004	1	199309772	0.0343	401172	ad	TRUE	reported	3437	199278900	0.1787	3.98e-24	1	ebi-a-GCST90001493	Secreting CD4 regulatory T cell %CD4 regulatory T cell	TRUE	reported	igd	2	TRUE	NA
rs147071297	A	G	A	G	-1.174	0.0643	0.0039	NA	FALSE	FALSE	FALSE	9KAEGD	0.03495	1	191679470	0.0305	401172	ad	TRUE	reported	3437	191648600	0.1893	6.36e-10	1	ebi-a-GCST90001493	Secreting CD4 regulatory T cell %CD4 regulatory T cell	TRUE	reported	igd	2	TRUE	NA
rs17027464	A	T	A	T	-0.1786	0.0177	0.1986	NA	FALSE	TRUE	TRUE	9KAEGD	0.226	2	41319202	0.0147	401577	ad	TRUE	reported	3437	41546342	0.0311	1.02e-08	2	ebi-a-GCST90001493	Secreting CD4 regulatory T cell %CD4 regulatory T cell	TRUE	reported	igd	2	FALSE	NA
rs191753228	T	C	T	C	-2.181	0.0148	0.0041	NA	FALSE	FALSE	FALSE	9KAEGD	0.5969	1	196352038	0.0279	394472	ad	TRUE	reported	3437	196321168	0.2086	3.26e-25	1	ebi-a-GCST90001493	Secreting CD4 regulatory T cell %CD4 regulatory T cell	TRUE	reported	igd	2	TRUE	NA
rs413431	G	A	G	A	0.2955	-0.0198	0.8154	NA	FALSE	FALSE	FALSE	9KAEGD	0.1555	2	38949554	0.0139	401577	ad	TRUE	reported	3437	39176695	0.03106	3.31e-21	2	ebi-a-GCST90001493	Secreting CD4 regulatory T cell %CD4 regulatory T cell	TRUE	reported	igd	2	TRUE	NA
rs61836370	G	A	G	A	-0.5797	0.014	0.0145	NA	FALSE	FALSE	FALSE	9KAEGD	0.4286	1	188722338	0.0177	401577	ad	TRUE	reported	3437	188691469	0.1002	7.92e-09	1	ebi-a-GCST90001493	Secreting CD4 regulatory T cell %CD4 regulatory T cell	TRUE	reported	igd	2	TRUE	NA
rs6751481	C	T	C	T	-0.2879	0.0042	0.4709	NA	FALSE	FALSE	FALSE	9KAEGD	0.6083	2	38670668	0.0083	401577	ad	TRUE	reported	3437	38897810	0.02374	3.53e-33	2	ebi-a-GCST90001493	Secreting CD4 regulatory T cell %CD4 regulatory T cell	TRUE	reported	igd	2	TRUE	NA
rs74967706	C	T	C	T	-0.7866	-0.0037	0.0087	NA	FALSE	FALSE	FALSE	9KAEGD	0.8798	1	195497020	0.0248	401577	ad	TRUE	reported	3437	195466150	0.1263	5.3e-10	1	ebi-a-GCST90001493	Secreting CD4 regulatory T cell %CD4 regulatory T cell	TRUE	reported	igd	2	TRUE	NA
rs113435341	G	A	G	A	-2.54	0.0595	0.0032	NA	FALSE	FALSE	FALSE	9KAEGD	0.07244	1	198182558	0.0331	400497	ad	TRUE	reported	3437	198151688	0.2093	3.14e-33	1	ebi-a-GCST90001493	Secreting CD4 regulatory T cell %CD4 regulatory T cell	TRUE	reported	igd	2	TRUE	NA
rs11579717	A	G	A	G	-1.776	0.0488	0.0044	NA	FALSE	FALSE	FALSE	9KAEGD	0.01611	1	200029993	0.0203	401577	ad	TRUE	reported	3437	199999121	0.1774	2.93e-23	1	ebi-a-GCST90001493	Secreting CD4 regulatory T cell %CD4 regulatory T cell	TRUE	reported	igd	2	TRUE	NA
rs116794175	C	T	C	T	-1.417	0.041	0.0042	NA	FALSE	FALSE	FALSE	9KAEGD	0.5731	1	194041078	0.0728	386481	ad	TRUE	reported	3437	194010208	0.1841	1.78e-14	1	ebi-a-GCST90001493	Secreting CD4 regulatory T cell %CD4 regulatory T cell	TRUE	reported	igd	2	TRUE	NA
rs138915779	A	C	A	C	-1.535	0.0334	0.0035	NA	FALSE	FALSE	FALSE	9KAEGD	0.2641	1	190110040	0.0299	401172	ad	TRUE	reported	3437	190079170	0.2181	2.39e-12	1	ebi-a-GCST90001493	Secreting CD4 regulatory T cell %CD4 regulatory T cell	TRUE	reported	igd	2	TRUE	NA
rs140372175	C	A	C	A	-1.824	0.0564	0.0044	NA	FALSE	FALSE	FALSE	9KAEGD	0.1004	1	199309772	0.0343	401172	ad	TRUE	reported	3437	199278900	0.1787	3.98e-24	1	ebi-a-GCST90001493	Secreting CD4 regulatory T cell %CD4 regulatory T cell	TRUE	reported	igd	2	TRUE	NA
rs147071297	A	G	A	G	-1.174	0.0643	0.0039	NA	FALSE	FALSE	FALSE	9KAEGD	0.03495	1	191679470	0.0305	401172	ad	TRUE	reported	3437	191648600	0.1893	6.36e-10	1	ebi-a-GCST90001493	Secreting CD4 regulatory T cell %CD4 regulatory T cell	TRUE	reported	igd	2	TRUE	NA
rs17027464	A	T	A	T	-0.1786	0.0177	0.1986	NA	FALSE	TRUE	TRUE	9KAEGD	0.226	2	41319202	0.0147	401577	ad	TRUE	reported	3437	41546342	0.0311	1.02e-08	2	ebi-a-GCST90001493	Secreting CD4 regulatory T cell %CD4 regulatory T cell	TRUE	reported	igd	2	FALSE	NA
rs191753228	T	C	T	C	-2.181	0.0148	0.0041	NA	FALSE	FALSE	FALSE	9KAEGD	0.5969	1	196352038	0.0279	394472	ad	TRUE	reported	3437	196321168	0.2086	3.26e-25	1	ebi-a-GCST90001493	Secreting CD4 regulatory T cell %CD4 regulatory T cell	TRUE	reported	igd	2	TRUE	NA
rs413431	G	A	G	A	0.2955	-0.0198	0.8154	NA	FALSE	FALSE	FALSE	9KAEGD	0.1555	2	38949554	0.0139	401577	ad	TRUE	reported	3437	39176695	0.03106	3.31e-21	2	ebi-a-GCST90001493	Secreting CD4 regulatory T cell %CD4 regulatory T cell	TRUE	reported	igd	2	TRUE	NA
rs61836370	G	A	G	A	-0.5797	0.014	0.0145	NA	FALSE	FALSE	FALSE	9KAEGD	0.4286	1	188722338	0.0177	401577	ad	TRUE	reported	3437	188691469	0.1002	7.92e-09	1	ebi-a-GCST90001493	Secreting CD4 regulatory T cell %CD4 regulatory T cell	TRUE	reported	igd	2	TRUE	NA
rs6751481	C	T	C	T	-0.2879	0.0042	0.4709	NA	FALSE	FALSE	FALSE	9KAEGD	0.6083	2	38670668	0.0083	401577	ad	TRUE	reported	3437	38897810	0.02374	3.53e-33	2	ebi-a-GCST90001493	Secreting CD4 regulatory T cell %CD4 regulatory T cell	TRUE	reported	igd	2	TRUE	NA
rs74967706	C	T	C	T	-0.7866	-0.0037	0.0087	NA	FALSE	FALSE	FALSE	9KAEGD	0.8798	1	195497020	0.0248	401577	ad	TRUE	reported	3437	195466150	0.1263	5.3e-10	1	ebi-a-GCST90001493	Secreting CD4 regulatory T cell %CD4 regulatory T cell	TRUE	reported	igd	2	TRUE	NA
rs113435341	G	A	G	A	2.569	0.0595	0.0032	NA	FALSE	FALSE	FALSE	5gLFhO	0.07244	1	198182558	0.0331	400497	ad	TRUE	reported	1.28e-33	1	0.2103	3437	198151688	ebi-a-GCST90001499	Activated & resting CD4 regulatory T cell %CD4 regulatory T cell	TRUE	reported	igd	2	TRUE	NA
rs11579717	A	G	A	G	1.815	0.0488	0.0044	NA	FALSE	FALSE	FALSE	5gLFhO	0.01611	1	200029993	0.0203	401577	ad	TRUE	reported	5.33e-24	1	0.1783	3437	199999121	ebi-a-GCST90001499	Activated & resting CD4 regulatory T cell %CD4 regulatory T cell	TRUE	reported	igd	2	TRUE	NA
rs116794175	C	T	C	T	1.427	0.041	0.0042	NA	FALSE	FALSE	FALSE	5gLFhO	0.5731	1	194041078	0.0728	386481	ad	TRUE	reported	1.62e-14	1	0.1851	3437	194010208	ebi-a-GCST90001499	Activated & resting CD4 regulatory T cell %CD4 regulatory T cell	TRUE	reported	igd	2	TRUE	NA
rs138915779	A	C	A	C	1.545	0.0334	0.0035	NA	FALSE	FALSE	FALSE	5gLFhO	0.2641	1	190110040	0.0299	401172	ad	TRUE	reported	2.2e-12	1	0.2193	3437	190079170	ebi-a-GCST90001499	Activated & resting CD4 regulatory T cell %CD4 regulatory T cell	TRUE	reported	igd	2	TRUE	NA
rs140372175	C	A	C	A	1.859	0.0564	0.0044	NA	FALSE	FALSE	FALSE	5gLFhO	0.1004	1	199309772	0.0343	401172	ad	TRUE	reported	9.3e-25	1	0.1795	3437	199278900	ebi-a-GCST90001499	Activated & resting CD4 regulatory T cell %CD4 regulatory T cell	TRUE	reported	igd	2	TRUE	NA
rs147071297	A	G	A	G	1.19	0.0643	0.0039	NA	FALSE	FALSE	FALSE	5gLFhO	0.03495	1	191679470	0.0305	401172	ad	TRUE	reported	4.53e-10	1	0.1903	3437	191648600	ebi-a-GCST90001499	Activated & resting CD4 regulatory T cell %CD4 regulatory T cell	TRUE	reported	igd	2	TRUE	NA
rs17027464	A	T	A	T	0.1763	0.0177	0.1986	NA	FALSE	TRUE	TRUE	5gLFhO	0.226	2	41319202	0.0147	401577	ad	TRUE	reported	1.87e-08	2	0.03127	3437	41546342	ebi-a-GCST90001499	Activated & resting CD4 regulatory T cell %CD4 regulatory T cell	TRUE	reported	igd	2	FALSE	NA
rs191753228	T	C	T	C	2.217	0.0148	0.0041	NA	FALSE	FALSE	FALSE	5gLFhO	0.5969	1	196352038	0.0279	394472	ad	TRUE	reported	9.41e-26	1	0.2096	3437	196321168	ebi-a-GCST90001499	Activated & resting CD4 regulatory T cell %CD4 regulatory T cell	TRUE	reported	igd	2	TRUE	NA
rs413431	G	A	G	A	-0.2936	-0.0198	0.8154	NA	FALSE	FALSE	FALSE	5gLFhO	0.1555	2	38949554	0.0139	401577	ad	TRUE	reported	9.54e-21	2	0.03123	3437	39176695	ebi-a-GCST90001499	Activated & resting CD4 regulatory T cell %CD4 regulatory T cell	TRUE	reported	igd	2	TRUE	NA
rs61836370	G	A	G	A	0.5815	0.014	0.0145	NA	FALSE	FALSE	FALSE	5gLFhO	0.4286	1	188722338	0.0177	401577	ad	TRUE	reported	8.55e-09	1	0.1007	3437	188691469	ebi-a-GCST90001499	Activated & resting CD4 regulatory T cell %CD4 regulatory T cell	TRUE	reported	igd	2	TRUE	NA
rs6751481	C	T	C	T	0.2886	0.0042	0.4709	NA	FALSE	FALSE	FALSE	5gLFhO	0.6083	2	38670668	0.0083	401577	ad	TRUE	reported	5.49e-33	2	0.02387	3437	38897810	ebi-a-GCST90001499	Activated & resting CD4 regulatory T cell %CD4 regulatory T cell	TRUE	reported	igd	2	TRUE	NA
rs74967706	C	T	C	T	0.791	-0.0037	0.0087	NA	FALSE	FALSE	FALSE	5gLFhO	0.8798	1	195497020	0.0248	401577	ad	TRUE	reported	5.23e-10	1	0.127	3437	195466150	ebi-a-GCST90001499	Activated & resting CD4 regulatory T cell %CD4 regulatory T cell	TRUE	reported	igd	2	TRUE	NA
rs113435341	G	A	G	A	2.569	0.0595	0.0032	NA	FALSE	FALSE	FALSE	5gLFhO	0.07244	1	198182558	0.0331	400497	ad	TRUE	reported	1.28e-33	1	0.2103	3437	198151688	ebi-a-GCST90001499	Activated & resting CD4 regulatory T cell %CD4 regulatory T cell	TRUE	reported	igd	2	TRUE	NA
rs11579717	A	G	A	G	1.815	0.0488	0.0044	NA	FALSE	FALSE	FALSE	5gLFhO	0.01611	1	200029993	0.0203	401577	ad	TRUE	reported	5.33e-24	1	0.1783	3437	199999121	ebi-a-GCST90001499	Activated & resting CD4 regulatory T cell %CD4 regulatory T cell	TRUE	reported	igd	2	TRUE	NA
rs116794175	C	T	C	T	1.427	0.041	0.0042	NA	FALSE	FALSE	FALSE	5gLFhO	0.5731	1	194041078	0.0728	386481	ad	TRUE	reported	1.62e-14	1	0.1851	3437	194010208	ebi-a-GCST90001499	Activated & resting CD4 regulatory T cell %CD4 regulatory T cell	TRUE	reported	igd	2	TRUE	NA
rs138915779	A	C	A	C	1.545	0.0334	0.0035	NA	FALSE	FALSE	FALSE	5gLFhO	0.2641	1	190110040	0.0299	401172	ad	TRUE	reported	2.2e-12	1	0.2193	3437	190079170	ebi-a-GCST90001499	Activated & resting CD4 regulatory T cell %CD4 regulatory T cell	TRUE	reported	igd	2	TRUE	NA
rs140372175	C	A	C	A	1.859	0.0564	0.0044	NA	FALSE	FALSE	FALSE	5gLFhO	0.1004	1	199309772	0.0343	401172	ad	TRUE	reported	9.3e-25	1	0.1795	3437	199278900	ebi-a-GCST90001499	Activated & resting CD4 regulatory T cell %CD4 regulatory T cell	TRUE	reported	igd	2	TRUE	NA
rs147071297	A	G	A	G	1.19	0.0643	0.0039	NA	FALSE	FALSE	FALSE	5gLFhO	0.03495	1	191679470	0.0305	401172	ad	TRUE	reported	4.53e-10	1	0.1903	3437	191648600	ebi-a-GCST90001499	Activated & resting CD4 regulatory T cell %CD4 regulatory T cell	TRUE	reported	igd	2	TRUE	NA
rs17027464	A	T	A	T	0.1763	0.0177	0.1986	NA	FALSE	TRUE	TRUE	5gLFhO	0.226	2	41319202	0.0147	401577	ad	TRUE	reported	1.87e-08	2	0.03127	3437	41546342	ebi-a-GCST90001499	Activated & resting CD4 regulatory T cell %CD4 regulatory T cell	TRUE	reported	igd	2	FALSE	NA
rs191753228	T	C	T	C	2.217	0.0148	0.0041	NA	FALSE	FALSE	FALSE	5gLFhO	0.5969	1	196352038	0.0279	394472	ad	TRUE	reported	9.41e-26	1	0.2096	3437	196321168	ebi-a-GCST90001499	Activated & resting CD4 regulatory T cell %CD4 regulatory T cell	TRUE	reported	igd	2	TRUE	NA
rs413431	G	A	G	A	-0.2936	-0.0198	0.8154	NA	FALSE	FALSE	FALSE	5gLFhO	0.1555	2	38949554	0.0139	401577	ad	TRUE	reported	9.54e-21	2	0.03123	3437	39176695	ebi-a-GCST90001499	Activated & resting CD4 regulatory T cell %CD4 regulatory T cell	TRUE	reported	igd	2	TRUE	NA
rs61836370	G	A	G	A	0.5815	0.014	0.0145	NA	FALSE	FALSE	FALSE	5gLFhO	0.4286	1	188722338	0.0177	401577	ad	TRUE	reported	8.55e-09	1	0.1007	3437	188691469	ebi-a-GCST90001499	Activated & resting CD4 regulatory T cell %CD4 regulatory T cell	TRUE	reported	igd	2	TRUE	NA
rs6751481	C	T	C	T	0.2886	0.0042	0.4709	NA	FALSE	FALSE	FALSE	5gLFhO	0.6083	2	38670668	0.0083	401577	ad	TRUE	reported	5.49e-33	2	0.02387	3437	38897810	ebi-a-GCST90001499	Activated & resting CD4 regulatory T cell %CD4 regulatory T cell	TRUE	reported	igd	2	TRUE	NA
rs74967706	C	T	C	T	0.791	-0.0037	0.0087	NA	FALSE	FALSE	FALSE	5gLFhO	0.8798	1	195497020	0.0248	401577	ad	TRUE	reported	5.23e-10	1	0.127	3437	195466150	ebi-a-GCST90001499	Activated & resting CD4 regulatory T cell %CD4 regulatory T cell	TRUE	reported	igd	2	TRUE	NA
rs113435341	G	A	G	A	-2.018	0.0595	0.0032	NA	FALSE	FALSE	FALSE	owOWcz	0.07244	1	198182558	0.0331	400497	ad	TRUE	reported	0.2282	1.47e-18	198151688	3405	1	ebi-a-GCST90001501	Activated & secreting CD4 regulatory T cell Absolute Count	TRUE	reported	igd	2	TRUE	NA
rs11579717	A	G	A	G	-1.179	0.0488	0.0044	NA	FALSE	FALSE	FALSE	owOWcz	0.01611	1	200029993	0.0203	401577	ad	TRUE	reported	0.1933	1.18e-09	199999121	3405	1	ebi-a-GCST90001501	Activated & secreting CD4 regulatory T cell Absolute Count	TRUE	reported	igd	2	TRUE	NA
rs138915779	A	C	A	C	-1.518	0.0334	0.0034	NA	FALSE	FALSE	FALSE	owOWcz	0.2641	1	190110040	0.0299	401172	ad	TRUE	reported	0.2369	1.67e-10	190079170	3405	1	ebi-a-GCST90001501	Activated & secreting CD4 regulatory T cell Absolute Count	TRUE	reported	igd	2	TRUE	NA
rs147198392	C	T	C	T	-1.155	0.0216	0.0051	NA	FALSE	FALSE	FALSE	owOWcz	0.4203	1	199624983	0.0268	401172	ad	TRUE	reported	0.1742	3.93e-11	199594111	3405	1	ebi-a-GCST90001501	Activated & secreting CD4 regulatory T cell Absolute Count	TRUE	reported	igd	2	TRUE	NA
rs191753228	T	C	T	C	-1.474	0.0148	0.0041	NA	FALSE	FALSE	FALSE	owOWcz	0.5969	1	196352038	0.0279	394472	ad	TRUE	reported	0.2274	1.05e-10	196321168	3405	1	ebi-a-GCST90001501	Activated & secreting CD4 regulatory T cell Absolute Count	TRUE	reported	igd	2	TRUE	NA
rs61839660	T	C	T	C	0.3316	-0.0299	0.0542	NA	FALSE	FALSE	FALSE	owOWcz	0.03848	10	6052734	0.0144	401577	ad	TRUE	reported	0.05733	7.93e-09	6094697	3405	10	ebi-a-GCST90001501	Activated & secreting CD4 regulatory T cell Absolute Count	TRUE	reported	igd	2	TRUE	NA
rs113435341	G	A	G	A	-2.621	0.0595	0.0032	NA	FALSE	FALSE	FALSE	kU4xbi	0.07244	1	198182558	0.0331	400497	ad	TRUE	reported	0.1957	3437	1	198151688	6.33e-40	ebi-a-GCST90001502	Activated & secreting CD4 regulatory T cell %CD4 regulatory T cell	TRUE	reported	igd	2	TRUE	NA
rs11579717	A	G	A	G	-1.821	0.0488	0.0044	NA	FALSE	FALSE	FALSE	kU4xbi	0.01611	1	200029993	0.0203	401577	ad	TRUE	reported	0.1663	3437	1	199999121	1.87e-27	ebi-a-GCST90001502	Activated & secreting CD4 regulatory T cell %CD4 regulatory T cell	TRUE	reported	igd	2	TRUE	NA
rs116794175	C	T	C	T	-1.387	0.041	0.0042	NA	FALSE	FALSE	FALSE	kU4xbi	0.5731	1	194041078	0.0728	386481	ad	TRUE	reported	0.1729	3437	1	194010208	1.41e-15	ebi-a-GCST90001502	Activated & secreting CD4 regulatory T cell %CD4 regulatory T cell	TRUE	reported	igd	2	TRUE	NA
rs12133465	G	A	G	A	-0.6898	0.0077	0.0096	NA	FALSE	FALSE	FALSE	kU4xbi	0.7466	1	195461206	0.0239	401577	ad	TRUE	reported	0.1146	3437	1	195430336	1.94e-09	ebi-a-GCST90001502	Activated & secreting CD4 regulatory T cell %CD4 regulatory T cell	TRUE	reported	igd	2	TRUE	NA
rs138915779	A	C	A	C	-1.784	0.0334	0.0035	NA	FALSE	FALSE	FALSE	kU4xbi	0.2641	1	190110040	0.0299	401172	ad	TRUE	reported	0.2042	3437	1	190079170	3.7e-18	ebi-a-GCST90001502	Activated & secreting CD4 regulatory T cell %CD4 regulatory T cell	TRUE	reported	igd	2	TRUE	NA
rs140372175	C	A	C	A	-1.832	0.0564	0.0044	NA	FALSE	FALSE	FALSE	kU4xbi	0.1004	1	199309772	0.0343	401172	ad	TRUE	reported	0.1676	3437	1	199278900	2.23e-27	ebi-a-GCST90001502	Activated & secreting CD4 regulatory T cell %CD4 regulatory T cell	TRUE	reported	igd	2	TRUE	NA
rs146899923	C	T	C	T	-0.7496	0.0481	0.0089	NA	FALSE	FALSE	FALSE	kU4xbi	0.1254	1	195950719	0.0314	400497	ad	TRUE	reported	0.1241	3437	1	195919849	1.68e-09	ebi-a-GCST90001502	Activated & secreting CD4 regulatory T cell %CD4 regulatory T cell	TRUE	reported	igd	2	TRUE	NA
rs147071297	A	G	A	G	-1.261	0.0643	0.0039	NA	FALSE	FALSE	FALSE	kU4xbi	0.03495	1	191679470	0.0305	401172	ad	TRUE	reported	0.1774	3437	1	191648600	1.39e-12	ebi-a-GCST90001502	Activated & secreting CD4 regulatory T cell %CD4 regulatory T cell	TRUE	reported	igd	2	TRUE	NA
rs187089343	C	A	C	A	-0.9956	-0.006	0.0047	NA	FALSE	FALSE	FALSE	kU4xbi	0.9293	1	182122403	0.0676	397326	ad	TRUE	reported	0.1693	3437	1	182091538	4.52e-09	ebi-a-GCST90001502	Activated & secreting CD4 regulatory T cell %CD4 regulatory T cell	TRUE	reported	igd	2	TRUE	NA
rs191753228	T	C	T	C	-2.33	0.0148	0.0041	NA	FALSE	FALSE	FALSE	kU4xbi	0.5969	1	196352038	0.0279	394472	ad	TRUE	reported	0.1949	3437	1	196321168	2.6e-32	ebi-a-GCST90001502	Activated & secreting CD4 regulatory T cell %CD4 regulatory T cell	TRUE	reported	igd	2	TRUE	NA
rs413431	G	A	G	A	0.2748	-0.0198	0.8154	NA	FALSE	FALSE	FALSE	kU4xbi	0.1555	2	38949554	0.0139	401577	ad	TRUE	reported	0.0293	3437	2	39176695	1.16e-20	ebi-a-GCST90001502	Activated & secreting CD4 regulatory T cell %CD4 regulatory T cell	TRUE	reported	igd	2	TRUE	NA
rs61836370	G	A	G	A	-0.5671	0.014	0.0145	NA	FALSE	FALSE	FALSE	kU4xbi	0.4286	1	188722338	0.0177	401577	ad	TRUE	reported	0.09405	3437	1	188691469	1.82e-09	ebi-a-GCST90001502	Activated & secreting CD4 regulatory T cell %CD4 regulatory T cell	TRUE	reported	igd	2	TRUE	NA
rs6751481	C	T	C	T	-0.2903	0.0042	0.4709	NA	FALSE	FALSE	FALSE	kU4xbi	0.6083	2	38670668	0.0083	401577	ad	TRUE	reported	0.02227	3437	2	38897810	6.29e-38	ebi-a-GCST90001502	Activated & secreting CD4 regulatory T cell %CD4 regulatory T cell	TRUE	reported	igd	2	TRUE	NA
rs7530076	A	G	A	G	0.4611	0.0372	0.9748	NA	FALSE	FALSE	FALSE	kU4xbi	0.1262	1	195856146	0.0243	395471	ad	TRUE	reported	0.07373	3437	1	195825276	4.5e-10	ebi-a-GCST90001502	Activated & secreting CD4 regulatory T cell %CD4 regulatory T cell	TRUE	reported	igd	2	TRUE	NA
rs9309071	A	G	A	G	-0.1699	-0.0087	0.2105	NA	FALSE	FALSE	FALSE	kU4xbi	0.3605	2	41667343	0.0095	401577	ad	TRUE	reported	0.02795	3437	2	41894483	1.34e-09	ebi-a-GCST90001502	Activated & secreting CD4 regulatory T cell %CD4 regulatory T cell	TRUE	reported	igd	2	TRUE	NA
rs10905719	A	G	A	G	0.1841	0.015	0.2082	NA	FALSE	FALSE	FALSE	vt1VTc	0.09006	10	6073208	0.0089	401577	ad	TRUE	reported	3437	6115171	0.03172	10	7.06e-09	ebi-a-GCST90001508	CD25++ CD45RA+ CD4 not regulatory T cell %CD4+ T cell	TRUE	reported	igd	2	TRUE	NA
rs11124653	A	C	A	C	-0.2138	0.0066	0.5911	NA	FALSE	FALSE	FALSE	vt1VTc	0.4258	2	38885025	0.0083	401577	ad	TRUE	reported	3437	39112166	0.02624	2	5.23e-16	ebi-a-GCST90001508	CD25++ CD45RA+ CD4 not regulatory T cell %CD4+ T cell	TRUE	reported	igd	2	TRUE	NA
rs115328872	A	G	A	G	1.856	0.0226	0.0036	NA	FALSE	FALSE	FALSE	vt1VTc	0.426	1	197952116	0.0283	401577	ad	TRUE	reported	3437	197921246	0.2054	1	2.68e-19	ebi-a-GCST90001508	CD25++ CD45RA+ CD4 not regulatory T cell %CD4+ T cell	TRUE	reported	igd	2	TRUE	NA
rs11579717	A	G	A	G	1.418	0.0488	0.0044	NA	FALSE	FALSE	FALSE	vt1VTc	0.01611	1	200029993	0.0203	401577	ad	TRUE	reported	3437	199999121	0.1913	1	1.55e-13	ebi-a-GCST90001508	CD25++ CD45RA+ CD4 not regulatory T cell %CD4+ T cell	TRUE	reported	igd	2	TRUE	NA
rs116517602	T	C	T	C	1.941	0.0657	0.0041	NA	FALSE	FALSE	FALSE	vt1VTc	0.07351	1	198952939	0.0367	400497	ad	TRUE	reported	3437	198922068	0.1905	1	4.76e-24	ebi-a-GCST90001508	CD25++ CD45RA+ CD4 not regulatory T cell %CD4+ T cell	TRUE	reported	igd	2	TRUE	NA
rs116794175	C	T	C	T	1.112	0.041	0.0042	NA	FALSE	FALSE	FALSE	vt1VTc	0.5731	1	194041078	0.0728	386481	ad	TRUE	reported	3437	194010208	0.1976	1	1.98e-08	ebi-a-GCST90001508	CD25++ CD45RA+ CD4 not regulatory T cell %CD4+ T cell	TRUE	reported	igd	2	TRUE	NA
rs138915779	A	C	A	C	1.302	0.0334	0.0035	NA	FALSE	FALSE	FALSE	vt1VTc	0.2641	1	190110040	0.0299	401172	ad	TRUE	reported	3437	190079170	0.234	1	2.82e-08	ebi-a-GCST90001508	CD25++ CD45RA+ CD4 not regulatory T cell %CD4+ T cell	TRUE	reported	igd	2	TRUE	NA
rs191753228	T	C	T	C	2.034	0.0148	0.0041	NA	FALSE	FALSE	FALSE	vt1VTc	0.5969	1	196352038	0.0279	394472	ad	TRUE	reported	3437	196321168	0.2246	1	2.18e-19	ebi-a-GCST90001508	CD25++ CD45RA+ CD4 not regulatory T cell %CD4+ T cell	TRUE	reported	igd	2	TRUE	NA
rs61836370	G	A	G	A	0.6318	0.014	0.0145	NA	FALSE	FALSE	FALSE	vt1VTc	0.4286	1	188722338	0.0177	401577	ad	TRUE	reported	3437	188691469	0.1074	1	4.42e-09	ebi-a-GCST90001508	CD25++ CD45RA+ CD4 not regulatory T cell %CD4+ T cell	TRUE	reported	igd	2	TRUE	NA
rs10905719	A	G	A	G	0.1734	0.015	0.2082	NA	FALSE	FALSE	FALSE	F1Wg0L	0.09006	10	6073208	0.0089	401577	ad	TRUE	reported	6115171	10	3437	0.03172	4.88e-08	ebi-a-GCST90001509	CD25++ CD45RA+ CD4 not regulatory T cell %T cell	TRUE	reported	igd	2	TRUE	NA
rs11124653	A	C	A	C	-0.1952	0.0066	0.5911	NA	FALSE	FALSE	FALSE	F1Wg0L	0.4258	2	38885025	0.0083	401577	ad	TRUE	reported	39112166	2	3437	0.02627	1.36e-13	ebi-a-GCST90001509	CD25++ CD45RA+ CD4 not regulatory T cell %T cell	TRUE	reported	igd	2	TRUE	NA
rs115328872	A	G	A	G	1.789	0.0226	0.0036	NA	FALSE	FALSE	FALSE	F1Wg0L	0.426	1	197952116	0.0283	401577	ad	TRUE	reported	197921246	1	3437	0.2055	4.79e-18	ebi-a-GCST90001509	CD25++ CD45RA+ CD4 not regulatory T cell %T cell	TRUE	reported	igd	2	TRUE	NA
rs11579717	A	G	A	G	1.391	0.0488	0.0044	NA	FALSE	FALSE	FALSE	F1Wg0L	0.01611	1	200029993	0.0203	401577	ad	TRUE	reported	199999121	1	3437	0.1912	4.29e-13	ebi-a-GCST90001509	CD25++ CD45RA+ CD4 not regulatory T cell %T cell	TRUE	reported	igd	2	TRUE	NA
rs116517602	T	C	T	C	1.875	0.0657	0.0041	NA	FALSE	FALSE	FALSE	F1Wg0L	0.07351	1	198952939	0.0367	400497	ad	TRUE	reported	198922068	1	3437	0.1906	1.5e-22	ebi-a-GCST90001509	CD25++ CD45RA+ CD4 not regulatory T cell %T cell	TRUE	reported	igd	2	TRUE	NA
rs116794175	C	T	C	T	1.11	0.041	0.0042	NA	FALSE	FALSE	FALSE	F1Wg0L	0.5731	1	194041078	0.0728	386481	ad	TRUE	reported	194010208	1	3437	0.1975	2.08e-08	ebi-a-GCST90001509	CD25++ CD45RA+ CD4 not regulatory T cell %T cell	TRUE	reported	igd	2	TRUE	NA
rs191753228	T	C	T	C	1.928	0.0148	0.0041	NA	FALSE	FALSE	FALSE	F1Wg0L	0.5969	1	196352038	0.0279	394472	ad	TRUE	reported	196321168	1	3437	0.2247	1.4e-17	ebi-a-GCST90001509	CD25++ CD45RA+ CD4 not regulatory T cell %T cell	TRUE	reported	igd	2	TRUE	NA
rs61836370	G	A	G	A	0.6084	0.014	0.0145	NA	FALSE	FALSE	FALSE	F1Wg0L	0.4286	1	188722338	0.0177	401577	ad	TRUE	reported	188691469	1	3437	0.1074	1.58e-08	ebi-a-GCST90001509	CD25++ CD45RA+ CD4 not regulatory T cell %T cell	TRUE	reported	igd	2	TRUE	NA
rs113435341	G	A	G	A	-1.681	0.0595	0.0032	NA	FALSE	FALSE	FALSE	2AKnCD	0.07244	1	198182558	0.0331	400497	ad	TRUE	reported	1	3405	198151688	0.2295	3.03e-13	ebi-a-GCST90001510	CD25++ CD45RA- CD4 not regulatory T cell Absolute Count	TRUE	reported	igd	2	TRUE	NA
rs140372175	C	A	C	A	-1.069	0.0564	0.0044	NA	FALSE	FALSE	FALSE	2AKnCD	0.1004	1	199309772	0.0343	401172	ad	TRUE	reported	1	3405	199278900	0.1952	4.71e-08	ebi-a-GCST90001510	CD25++ CD45RA- CD4 not regulatory T cell Absolute Count	TRUE	reported	igd	2	TRUE	NA
rs191753228	T	C	T	C	-1.274	0.0148	0.0041	NA	FALSE	FALSE	FALSE	2AKnCD	0.5969	1	196352038	0.0279	394472	ad	TRUE	reported	1	3405	196321168	0.2283	2.58e-08	ebi-a-GCST90001510	CD25++ CD45RA- CD4 not regulatory T cell Absolute Count	TRUE	reported	igd	2	TRUE	NA
rs61839660	T	C	T	C	0.5547	-0.0299	0.0542	NA	FALSE	FALSE	FALSE	2AKnCD	0.03848	10	6052734	0.0144	401577	ad	TRUE	reported	10	3405	6094697	0.05665	2.4e-22	ebi-a-GCST90001510	CD25++ CD45RA- CD4 not regulatory T cell Absolute Count	TRUE	reported	igd	2	TRUE	NA
rs11579717	A	G	A	G	-1.241	0.0488	0.0044	NA	FALSE	FALSE	FALSE	LkVvwh	0.01611	1	200029993	0.0203	401577	ad	TRUE	reported	1	0.1909	9.23e-11	199999121	3437	ebi-a-GCST90001511	CD25++ CD45RA- CD4 not regulatory T cell %CD4+ T cell	TRUE	reported	igd	2	TRUE	NA
rs116794175	C	T	C	T	-1.101	0.041	0.0042	NA	FALSE	FALSE	FALSE	LkVvwh	0.5731	1	194041078	0.0728	386481	ad	TRUE	reported	1	0.1969	2.46e-08	194010208	3437	ebi-a-GCST90001511	CD25++ CD45RA- CD4 not regulatory T cell %CD4+ T cell	TRUE	reported	igd	2	TRUE	NA
rs140372175	C	A	C	A	-1.2	0.0564	0.0044	NA	FALSE	FALSE	FALSE	LkVvwh	0.1004	1	199309772	0.0343	401172	ad	TRUE	reported	1	0.1923	4.93e-10	199278900	3437	ebi-a-GCST90001511	CD25++ CD45RA- CD4 not regulatory T cell %CD4+ T cell	TRUE	reported	igd	2	TRUE	NA
rs17583875	A	G	A	G	-1.737	0.0141	0.0029	NA	FALSE	FALSE	FALSE	LkVvwh	0.6304	1	197955640	0.0293	400497	ad	TRUE	reported	1	0.2311	7.08e-14	197924770	3437	ebi-a-GCST90001511	CD25++ CD45RA- CD4 not regulatory T cell %CD4+ T cell	TRUE	reported	igd	2	TRUE	NA
rs191753228	T	C	T	C	-1.501	0.0148	0.0041	NA	FALSE	FALSE	FALSE	LkVvwh	0.5969	1	196352038	0.0279	394472	ad	TRUE	reported	1	0.2249	2.87e-11	196321168	3437	ebi-a-GCST90001511	CD25++ CD45RA- CD4 not regulatory T cell %CD4+ T cell	TRUE	reported	igd	2	TRUE	NA
rs61839660	T	C	T	C	0.6146	-0.0299	0.0543	NA	FALSE	FALSE	FALSE	LkVvwh	0.03848	10	6052734	0.0144	401577	ad	TRUE	reported	10	0.05523	2.78e-28	6094697	3437	ebi-a-GCST90001511	CD25++ CD45RA- CD4 not regulatory T cell %CD4+ T cell	TRUE	reported	igd	2	TRUE	NA
rs11579717	A	G	A	G	-1.078	0.0488	0.0044	NA	FALSE	FALSE	FALSE	2N6idp	0.01611	1	200029993	0.0203	401577	ad	TRUE	reported	1	0.1911	3437	1.83e-08	199999121	ebi-a-GCST90001512	CD25++ CD45RA- CD4 not regulatory T cell %T cell	TRUE	reported	igd	2	TRUE	NA
rs140372175	C	A	C	A	-1.064	0.0564	0.0044	NA	FALSE	FALSE	FALSE	2N6idp	0.1004	1	199309772	0.0343	401172	ad	TRUE	reported	1	0.1925	3437	3.46e-08	199278900	ebi-a-GCST90001512	CD25++ CD45RA- CD4 not regulatory T cell %T cell	TRUE	reported	igd	2	TRUE	NA
rs191753228	T	C	T	C	-1.382	0.0148	0.0041	NA	FALSE	FALSE	FALSE	2N6idp	0.5969	1	196352038	0.0279	394472	ad	TRUE	reported	1	0.225	3437	9.03e-10	196321168	ebi-a-GCST90001512	CD25++ CD45RA- CD4 not regulatory T cell %T cell	TRUE	reported	igd	2	TRUE	NA
rs4497244	A	G	A	G	-1.396	0.0499	0.0033	NA	FALSE	FALSE	FALSE	2N6idp	0.1033	1	198028823	0.0306	400497	ad	TRUE	reported	1	0.2116	3437	4.86e-11	197997953	ebi-a-GCST90001512	CD25++ CD45RA- CD4 not regulatory T cell %T cell	TRUE	reported	igd	2	TRUE	NA
rs61839660	T	C	T	C	0.5758	-0.0299	0.0543	NA	FALSE	FALSE	FALSE	2N6idp	0.03848	10	6052734	0.0144	401577	ad	TRUE	reported	10	0.05532	3437	5.32e-25	6094697	ebi-a-GCST90001512	CD25++ CD45RA- CD4 not regulatory T cell %T cell	TRUE	reported	igd	2	TRUE	NA
rs16988872	T	C	T	C	-0.2007	-0.0186	0.2659	NA	FALSE	FALSE	FALSE	Ih6Ccc	0.1322	19	51076904	0.0124	401577	ad	TRUE	reported	19	51580161	0.03572	1856	2.2e-08	ebi-a-GCST90001524	Granulocytic Myeloid-Derived Suppressor Cells Absolute Count	TRUE	reported	igd	2	TRUE	NA
rs3865444	A	C	A	C	-0.2687	-0.0337	0.2128	NA	FALSE	FALSE	FALSE	Ih6Ccc	0.00031	19	51224706	0.0093	401577	ad	TRUE	reported	19	51727962	0.03761	1856	1.28e-12	ebi-a-GCST90001524	Granulocytic Myeloid-Derived Suppressor Cells Absolute Count	TRUE	reported	igd	2	TRUE	NA
rs111388649	A	G	A	G	26.26	0.0541	0.0001	NA	FALSE	FALSE	FALSE	HYUHpa	0.06944	12	28093537	0.0298	401172	ad	TRUE	reported	28246470	3425	4.684	12	2.22e-08	ebi-a-GCST90001697	CD45RA- CD28- CD8+ T cell %T cell	TRUE	reported	igd	2	TRUE	NA
rs11233425	A	G	A	G	23.77	0.0064	0.0003	NA	FALSE	FALSE	FALSE	HYUHpa	0.8566	11	83021647	0.0353	400497	ad	TRUE	reported	82732689	3425	3.62	11	5.93e-11	ebi-a-GCST90001697	CD45RA- CD28- CD8+ T cell %T cell	TRUE	reported	igd	2	TRUE	NA
rs114135956	C	T	C	T	32	0.0343	0.0003	NA	FALSE	FALSE	FALSE	HYUHpa	0.1698	2	8790400	0.0249	394391	ad	TRUE	reported	8930530	3425	3.541	2	2.61e-19	ebi-a-GCST90001697	CD45RA- CD28- CD8+ T cell %T cell	TRUE	reported	igd	2	TRUE	NA
rs114216104	T	C	T	C	30.16	0.018	0.0001	NA	FALSE	FALSE	FALSE	HYUHpa	0.592	5	140751901	0.0336	400497	ad	TRUE	reported	140131486	3425	4.486	5	2.09e-11	ebi-a-GCST90001697	CD45RA- CD28- CD8+ T cell %T cell	TRUE	reported	igd	2	TRUE	NA
rs114763811	A	C	A	C	47.98	0.079	0.0001	NA	FALSE	FALSE	FALSE	HYUHpa	0.1149	2	190454383	0.0501	398536	ad	TRUE	reported	191319109	3425	7.59	2	2.92e-10	ebi-a-GCST90001697	CD45RA- CD28- CD8+ T cell %T cell	TRUE	reported	igd	2	TRUE	NA
rs115546994	T	A	T	A	15.77	-0.0269	0.0004	NA	FALSE	TRUE	TRUE	HYUHpa	0.5741	5	159635847	0.0479	400497	ad	TRUE	reported	159062854	3425	2.724	5	7.76e-09	ebi-a-GCST90001697	CD45RA- CD28- CD8+ T cell %T cell	TRUE	reported	igd	2	FALSE	NA
rs115954619	A	G	A	G	9.757	0.0152	0.0015	NA	FALSE	FALSE	FALSE	HYUHpa	0.7024	2	174032269	0.0397	400902	ad	TRUE	reported	174896997	3425	1.738	2	2.15e-08	ebi-a-GCST90001697	CD45RA- CD28- CD8+ T cell %T cell	TRUE	reported	igd	2	TRUE	NA
rs117006645	G	A	G	A	16.44	0.0311	0.0004	NA	FALSE	FALSE	FALSE	HYUHpa	0.7182	10	106384038	0.0862	386481	ad	TRUE	reported	108143796	3425	2.719	10	1.62e-09	ebi-a-GCST90001697	CD45RA- CD28- CD8+ T cell %T cell	TRUE	reported	igd	2	TRUE	NA
rs117428784	A	C	A	C	24.71	-0.045	0.0004	NA	FALSE	FALSE	FALSE	HYUHpa	0.2331	19	42918805	0.0378	400497	ad	TRUE	reported	43422957	3425	3.261	19	4.54e-14	ebi-a-GCST90001697	CD45RA- CD28- CD8+ T cell %T cell	TRUE	reported	igd	2	TRUE	NA
rs117552343	G	A	G	A	20.94	0.0812	0.0003	NA	FALSE	FALSE	FALSE	HYUHpa	0.02294	15	83578073	0.0357	401172	ad	TRUE	reported	84246825	3425	3.304	15	2.66e-10	ebi-a-GCST90001697	CD45RA- CD28- CD8+ T cell %T cell	TRUE	reported	igd	2	TRUE	NA
rs117975109	T	G	T	G	15.84	0.0312	0.0006	NA	FALSE	FALSE	FALSE	HYUHpa	0.4851	12	52014358	0.0447	400497	ad	TRUE	reported	52408142	3425	2.869	12	3.65e-08	ebi-a-GCST90001697	CD45RA- CD28- CD8+ T cell %T cell	TRUE	reported	igd	2	TRUE	NA
rs12597262	G	C	G	C	29.78	0.1333	0.0001	NA	FALSE	TRUE	TRUE	HYUHpa	0.1911	16	86408969	0.1019	379328	ad	TRUE	reported	86442575	3425	4.668	16	2.03e-10	ebi-a-GCST90001697	CD45RA- CD28- CD8+ T cell %T cell	TRUE	reported	igd	2	FALSE	NA
rs12656604	A	C	A	C	5.388	-0.0099	0.0047	NA	FALSE	FALSE	FALSE	HYUHpa	0.7164	5	73383229	0.0273	401577	ad	TRUE	reported	72679056	3425	0.8953	5	1.95e-09	ebi-a-GCST90001697	CD45RA- CD28- CD8+ T cell %T cell	TRUE	reported	igd	2	TRUE	NA
rs130071	A	G	A	G	1.086	0.0064	0.2185	NA	FALSE	FALSE	FALSE	HYUHpa	0.4774	6	31148433	0.009	400902	ad	TRUE	reported	31116210	3425	0.1686	6	1.37e-10	ebi-a-GCST90001697	CD45RA- CD28- CD8+ T cell %T cell	TRUE	reported	igd	2	TRUE	NA
rs140112233	C	G	C	G	43.28	-0.0183	0.0001	NA	FALSE	TRUE	TRUE	HYUHpa	0.634	7	116195587	0.0384	400497	ad	TRUE	reported	115835641	3425	6.761	7	1.74e-10	ebi-a-GCST90001697	CD45RA- CD28- CD8+ T cell %T cell	TRUE	reported	igd	2	FALSE	NA
rs143930177	A	G	A	G	4.44	-0.0064	0.0072	NA	FALSE	FALSE	FALSE	HYUHpa	0.7701	10	68783949	0.0219	401577	ad	TRUE	reported	70543706	3425	0.7441	10	2.66e-09	ebi-a-GCST90001697	CD45RA- CD28- CD8+ T cell %T cell	TRUE	reported	igd	2	TRUE	NA
rs149487182	T	C	T	C	20.95	-0.0302	0.0004	NA	FALSE	FALSE	FALSE	HYUHpa	0.4093	8	130505772	0.0366	400497	ad	TRUE	reported	131518018	3425	2.979	8	2.46e-12	ebi-a-GCST90001697	CD45RA- CD28- CD8+ T cell %T cell	TRUE	reported	igd	2	TRUE	NA
rs149716976	G	A	G	A	4.577	0.0073	0.0057	NA	FALSE	FALSE	FALSE	HYUHpa	0.8078	16	75028727	0.0302	400497	ad	TRUE	reported	75062625	3425	0.79	16	7.53e-09	ebi-a-GCST90001697	CD45RA- CD28- CD8+ T cell %T cell	TRUE	reported	igd	2	TRUE	NA
rs149994650	A	C	A	G	22.84	-0.2614	0.0003	NA	TRUE	FALSE	FALSE	HYUHpa	0.4416	3	18509372	0.3397	21839	ad	TRUE	reported	18550864	3425	3.766	3	1.47e-09	ebi-a-GCST90001697	CD45RA- CD28- CD8+ T cell %T cell	TRUE	reported	igd	2	FALSE	NA
rs150146567	A	T	A	T	8.79	-0.0087	0.0019	NA	FALSE	TRUE	TRUE	HYUHpa	0.865	2	12644082	0.0512	394391	ad	TRUE	reported	12784208	3425	1.394	2	3.28e-10	ebi-a-GCST90001697	CD45RA- CD28- CD8+ T cell %T cell	TRUE	reported	igd	2	FALSE	NA
rs151077900	C	G	C	G	15.42	0.001	0.0004	NA	FALSE	TRUE	TRUE	HYUHpa	0.9829	16	987963	0.0458	400497	ad	TRUE	reported	1037963	3425	2.675	16	8.83e-09	ebi-a-GCST90001697	CD45RA- CD28- CD8+ T cell %T cell	TRUE	reported	igd	2	FALSE	NA
rs151237482	C	A	C	A	11.85	0.0349	0.0009	NA	FALSE	FALSE	FALSE	HYUHpa	0.4939	16	78180669	0.051	400497	ad	TRUE	reported	78214566	3425	2.061	16	9.68e-09	ebi-a-GCST90001697	CD45RA- CD28- CD8+ T cell %T cell	TRUE	reported	igd	2	TRUE	NA
rs186595909	A	G	A	G	19.32	0.0402	0.0003	NA	FALSE	FALSE	FALSE	HYUHpa	0.2717	15	78262368	0.0366	400497	ad	TRUE	reported	78554710	3425	3.338	15	7.72e-09	ebi-a-GCST90001697	CD45RA- CD28- CD8+ T cell %T cell	TRUE	reported	igd	2	TRUE	NA
rs189825578	T	A	T	A	68.11	-0.007	NA	NA	FALSE	TRUE	TRUE	HYUHpa	0.8349	12	31602630	0.0334	400497	ad	TRUE	reported	31755564	3425	10.7	12	2.21e-10	ebi-a-GCST90001697	CD45RA- CD28- CD8+ T cell %T cell	TRUE	reported	igd	2	FALSE	NA
rs190272290	A	G	A	G	24.63	-0.0333	0.0003	NA	FALSE	FALSE	FALSE	HYUHpa	0.3287	2	9803923	0.0341	400497	ad	TRUE	reported	9944052	3425	3.673	2	2.34e-11	ebi-a-GCST90001697	CD45RA- CD28- CD8+ T cell %T cell	TRUE	reported	igd	2	TRUE	NA
rs192302673	T	C	T	C	12.63	0.0234	0.0009	NA	FALSE	FALSE	FALSE	HYUHpa	0.6054	16	85651534	0.0453	398536	ad	TRUE	reported	85685140	3425	2.018	16	4.39e-10	ebi-a-GCST90001697	CD45RA- CD28- CD8+ T cell %T cell	TRUE	reported	igd	2	TRUE	NA
rs2615702	T	C	T	C	-11.3	0.0237	0.9991	NA	FALSE	FALSE	FALSE	HYUHpa	0.5569	16	81428638	0.0404	394391	ad	TRUE	reported	81462243	3425	2.015	16	2.21e-08	ebi-a-GCST90001697	CD45RA- CD28- CD8+ T cell %T cell	TRUE	reported	igd	2	TRUE	NA
rs2977034	T	C	T	C	9.254	0.1149	0.0015	NA	FALSE	FALSE	FALSE	HYUHpa	0.01537	8	87491486	0.0474	400497	ad	TRUE	reported	88503714	3425	1.615	8	1.08e-08	ebi-a-GCST90001697	CD45RA- CD28- CD8+ T cell %T cell	TRUE	reported	igd	2	TRUE	NA
rs34375694	G	A	G	A	18.3	0.1062	0.0003	NA	FALSE	FALSE	FALSE	HYUHpa	0.03192	16	19182041	0.0495	400497	ad	TRUE	reported	19193363	3425	3.188	16	1.04e-08	ebi-a-GCST90001697	CD45RA- CD28- CD8+ T cell %T cell	TRUE	reported	igd	2	TRUE	NA
rs538264691	C	A	C	A	20.46	-0.0092	0.0003	NA	FALSE	FALSE	FALSE	HYUHpa	0.8288	12	96646243	0.0424	387156	ad	TRUE	reported	97040021	3425	3.333	12	9.41e-10	ebi-a-GCST90001697	CD45RA- CD28- CD8+ T cell %T cell	TRUE	reported	igd	2	TRUE	NA
rs55881385	T	G	T	G	25.81	0.0524	0.0001	NA	FALSE	FALSE	FALSE	HYUHpa	0.1331	1	34258591	0.0349	400497	ad	TRUE	reported	34724192	3425	4.27	1	1.66e-09	ebi-a-GCST90001697	CD45RA- CD28- CD8+ T cell %T cell	TRUE	reported	igd	2	TRUE	NA
rs55971473	T	C	T	C	11.36	-0.0075	0.001	NA	FALSE	FALSE	FALSE	HYUHpa	0.833	1	116519156	0.0355	400497	ad	TRUE	reported	117061778	3425	1.879	1	1.67e-09	ebi-a-GCST90001697	CD45RA- CD28- CD8+ T cell %T cell	TRUE	reported	igd	2	TRUE	NA
rs58905133	G	A	G	A	1.152	-0.007	0.3523	NA	FALSE	FALSE	FALSE	HYUHpa	0.4148	2	38660822	0.0086	401577	ad	TRUE	reported	38887964	3425	0.1309	2	2.08e-18	ebi-a-GCST90001697	CD45RA- CD28- CD8+ T cell %T cell	TRUE	reported	igd	2	TRUE	NA
rs61772921	C	T	C	T	31.35	-0.0217	0.0001	NA	FALSE	FALSE	FALSE	HYUHpa	0.5267	1	80431877	0.0342	399211	ad	TRUE	reported	80897562	3425	4.91	1	1.95e-10	ebi-a-GCST90001697	CD45RA- CD28- CD8+ T cell %T cell	TRUE	reported	igd	2	TRUE	NA
rs61908026	C	G	C	G	19.12	-0.0148	0.0004	NA	FALSE	TRUE	TRUE	HYUHpa	0.5478	12	2699000	0.0246	400902	ad	TRUE	reported	2808166	3425	3.159	12	1.56e-09	ebi-a-GCST90001697	CD45RA- CD28- CD8+ T cell %T cell	TRUE	reported	igd	2	FALSE	NA
rs62021713	T	C	T	C	52.08	0.0532	0.0001	NA	FALSE	FALSE	FALSE	HYUHpa	0.05668	15	50073192	0.0279	400497	ad	TRUE	reported	50365389	3425	8.178	15	2.17e-10	ebi-a-GCST90001697	CD45RA- CD28- CD8+ T cell %T cell	TRUE	reported	igd	2	TRUE	NA
rs62409210	A	G	A	G	29.68	0.0201	0.0001	NA	FALSE	FALSE	FALSE	HYUHpa	0.5295	4	25411151	0.032	400497	ad	TRUE	reported	25412773	3425	4.936	4	2.03e-09	ebi-a-GCST90001697	CD45RA- CD28- CD8+ T cell %T cell	TRUE	reported	igd	2	TRUE	NA
rs62488802	T	C	T	C	29.98	0.0423	0.0003	NA	FALSE	FALSE	FALSE	HYUHpa	0.3323	8	7305173	0.0437	387691	ad	TRUE	reported	7162695	3425	3.911	8	2.31e-14	ebi-a-GCST90001697	CD45RA- CD28- CD8+ T cell %T cell	TRUE	reported	igd	2	TRUE	NA
rs742867	T	C	T	C	7.048	0.0582	0.0029	NA	FALSE	FALSE	FALSE	HYUHpa	0.1723	14	67751007	0.0426	400497	ad	TRUE	reported	68217724	3425	1.098	14	1.57e-10	ebi-a-GCST90001697	CD45RA- CD28- CD8+ T cell %T cell	TRUE	reported	igd	2	TRUE	NA
rs74707627	C	T	C	T	20.97	-0.0454	0.0003	NA	FALSE	FALSE	FALSE	HYUHpa	0.1459	15	85941512	0.0312	400497	ad	TRUE	reported	86484743	3425	3.305	15	2.5e-10	ebi-a-GCST90001697	CD45RA- CD28- CD8+ T cell %T cell	TRUE	reported	igd	2	TRUE	NA
rs75420474	C	T	C	T	28.44	0.0427	0.0003	NA	FALSE	FALSE	FALSE	HYUHpa	0.3575	18	42248753	0.0464	400497	ad	TRUE	reported	39828718	3425	3.429	18	1.57e-16	ebi-a-GCST90001697	CD45RA- CD28- CD8+ T cell %T cell	TRUE	reported	igd	2	TRUE	NA
rs76506268	G	A	G	A	6.353	-0.0099	0.0032	NA	FALSE	FALSE	FALSE	HYUHpa	0.6367	4	187060470	0.0209	400902	ad	TRUE	reported	187981624	3425	1.049	4	1.52e-09	ebi-a-GCST90001697	CD45RA- CD28- CD8+ T cell %T cell	TRUE	reported	igd	2	TRUE	NA
rs76938777	A	G	A	G	18.92	0.014	0.0003	NA	FALSE	FALSE	FALSE	HYUHpa	0.7016	7	31434287	0.0366	400497	ad	TRUE	reported	31473901	3425	3.324	7	1.37e-08	ebi-a-GCST90001697	CD45RA- CD28- CD8+ T cell %T cell	TRUE	reported	igd	2	TRUE	NA
rs79190516	G	T	G	T	10.56	-0.009	0.0012	NA	FALSE	FALSE	FALSE	HYUHpa	0.8444	2	150341245	0.0459	400497	ad	TRUE	reported	151197759	3425	1.865	2	1.64e-08	ebi-a-GCST90001697	CD45RA- CD28- CD8+ T cell %T cell	TRUE	reported	igd	2	TRUE	NA
rs12675298	A	G	A	G	-0.5258	-0.0581	0.0277	NA	FALSE	FALSE	FALSE	UDLU24	0.04102	8	6971291	0.0284	394391	ad	TRUE	reported	7.25e-10	6828813	0.08507	8	2848	ebi-a-GCST90001906	CD86 on granulocyte	TRUE	reported	igd	2	TRUE	NA
rs445	T	C	T	C	0.2079	0.0296	0.1973	NA	FALSE	FALSE	FALSE	UDLU24	0.02238	7	92779056	0.013	401577	ad	TRUE	reported	2.11e-09	92408370	0.0346	7	2848	ebi-a-GCST90001906	CD86 on granulocyte	TRUE	reported	igd	2	TRUE	NA
rs147195142	C	G	C	G	-0.5301	-0.0244	0.0355	NA	FALSE	TRUE	TRUE	ZUaVEZ	0.4058	19	49548391	0.0294	400902	ad	TRUE	reported	1634	0.09573	3.57e-08	50051648	19	ebi-a-GCST90001946	CD33 on CD14+ monocyte	TRUE	reported	igd	2	FALSE	NA
rs17836364	A	G	A	G	0.2941	-0.0093	0.1527	NA	FALSE	FALSE	FALSE	ZUaVEZ	0.4027	19	54336316	0.0111	400902	ad	TRUE	reported	1634	0.0498	4.25e-09	54847587	19	ebi-a-GCST90001946	CD33 on CD14+ monocyte	TRUE	reported	igd	2	TRUE	NA
rs3865444	A	C	A	C	-1.143	-0.0337	0.2121	NA	FALSE	FALSE	FALSE	ZUaVEZ	0.00031	19	51224706	0.0093	401577	ad	TRUE	reported	1634	0.03378	1.05e-190	51727962	19	ebi-a-GCST90001946	CD33 on CD14+ monocyte	TRUE	reported	igd	2	TRUE	NA
rs4310975	A	G	A	G	-0.3288	0.0013	0.295	NA	FALSE	FALSE	FALSE	ZUaVEZ	0.9036	19	52760973	0.0108	401577	ad	TRUE	reported	1634	0.03848	2.94e-17	53264226	19	ebi-a-GCST90001946	CD33 on CD14+ monocyte	TRUE	reported	igd	2	TRUE	NA
rs4802858	C	T	C	T	-0.2031	-0.0111	0.571	NA	FALSE	FALSE	FALSE	ZUaVEZ	0.2051	19	51749897	0.0088	401577	ad	TRUE	reported	1634	0.03621	2.39e-08	52253150	19	ebi-a-GCST90001946	CD33 on CD14+ monocyte	TRUE	reported	igd	2	TRUE	NA
rs558625031	A	G	A	G	-0.6341	-0.0257	0.0483	NA	FALSE	FALSE	FALSE	ZUaVEZ	0.4097	19	51355657	0.0312	393797	ad	TRUE	reported	1634	0.08187	1.67e-14	51858911	19	ebi-a-GCST90001946	CD33 on CD14+ monocyte	TRUE	reported	igd	2	TRUE	NA
rs73051934	G	A	G	A	-0.5834	0.0431	0.0278	NA	FALSE	FALSE	FALSE	ZUaVEZ	0.2248	19	48079659	0.0355	400497	ad	TRUE	reported	1634	0.1059	4.18e-08	48582916	19	ebi-a-GCST90001946	CD33 on CD14+ monocyte	TRUE	reported	igd	2	TRUE	NA
rs7351079	G	A	G	A	-0.4007	-0.0064	0.2708	NA	FALSE	FALSE	FALSE	ZUaVEZ	0.6025	19	51070781	0.0122	401577	ad	TRUE	reported	1634	0.04013	7.97e-23	51574038	19	ebi-a-GCST90001946	CD33 on CD14+ monocyte	TRUE	reported	igd	2	TRUE	NA
rs78949787	T	C	T	C	0.2828	-0.0022	0.5535	NA	FALSE	FALSE	FALSE	ZUaVEZ	0.8135	19	51087881	0.0094	400902	ad	TRUE	reported	1634	0.03593	6.32e-15	51591138	19	ebi-a-GCST90001946	CD33 on CD14+ monocyte	TRUE	reported	igd	2	TRUE	NA
rs2059816	A	G	A	G	0.3622	0.0169	0.9141	NA	FALSE	FALSE	FALSE	RWLdvo	0.1987	19	52418653	0.0132	400902	ad	TRUE	reported	0.0653	52921906	3.4e-08	19	1577	ebi-a-GCST90001947	CD33 on CD33+ HLA DR+ CD14dim	TRUE	reported	igd	2	TRUE	NA
rs3865444	A	C	A	C	-1.214	-0.0337	0.1934	NA	FALSE	FALSE	FALSE	RWLdvo	0.00031	19	51224706	0.0093	401577	ad	TRUE	reported	0.03655	51727962	7.83e-184	19	1577	ebi-a-GCST90001947	CD33 on CD33+ HLA DR+ CD14dim	TRUE	reported	igd	2	TRUE	NA
rs4310975	A	G	A	G	-0.2585	0.0013	0.2869	NA	FALSE	FALSE	FALSE	RWLdvo	0.9036	19	52760973	0.0108	401577	ad	TRUE	reported	0.0406	53264226	2.55e-10	19	1577	ebi-a-GCST90001947	CD33 on CD33+ HLA DR+ CD14dim	TRUE	reported	igd	2	TRUE	NA
rs558625031	A	G	A	G	-0.7134	-0.0257	0.0476	NA	FALSE	FALSE	FALSE	RWLdvo	0.4097	19	51355657	0.0312	393797	ad	TRUE	reported	0.085	51858911	1.04e-16	19	1577	ebi-a-GCST90001947	CD33 on CD33+ HLA DR+ CD14dim	TRUE	reported	igd	2	TRUE	NA
rs58301181	G	C	G	C	-0.4272	0.0191	0.0843	NA	FALSE	TRUE	TRUE	RWLdvo	0.1783	19	51594008	0.0142	401577	ad	TRUE	reported	0.06754	52097261	3.29e-10	19	1577	ebi-a-GCST90001947	CD33 on CD33+ HLA DR+ CD14dim	TRUE	reported	igd	2	FALSE	NA
rs7351079	G	A	G	A	-0.326	-0.0064	0.2613	NA	FALSE	FALSE	FALSE	RWLdvo	0.6025	19	51070781	0.0122	401577	ad	TRUE	reported	0.04234	51574038	2.43e-14	19	1577	ebi-a-GCST90001947	CD33 on CD33+ HLA DR+ CD14dim	TRUE	reported	igd	2	TRUE	NA
rs78949787	T	C	T	C	0.2876	-0.0022	0.5593	NA	FALSE	FALSE	FALSE	RWLdvo	0.8135	19	51087881	0.0094	400902	ad	TRUE	reported	0.03706	51591138	1.51e-14	19	1577	ebi-a-GCST90001947	CD33 on CD33+ HLA DR+ CD14dim	TRUE	reported	igd	2	TRUE	NA
rs1801274	G	A	G	A	-0.2575	0.0103	0.3298	NA	FALSE	FALSE	FALSE	0rL0q8	0.2032	1	161509955	0.0081	401577	ad	TRUE	reported	1	3.92e-11	0.0387	1633	161479745	ebi-a-GCST90001948	CD33 on CD33dim HLA DR+ CD11b+	TRUE	reported	igd	2	TRUE	NA
rs3865444	A	C	A	C	-1.139	-0.0337	0.2122	NA	FALSE	FALSE	FALSE	0rL0q8	0.00031	19	51224706	0.0093	401577	ad	TRUE	reported	19	2.38e-191	0.03358	1633	51727962	ebi-a-GCST90001948	CD33 on CD33dim HLA DR+ CD11b+	TRUE	reported	igd	2	TRUE	NA
rs4310975	A	G	A	G	-0.3077	0.0013	0.2945	NA	FALSE	FALSE	FALSE	0rL0q8	0.9036	19	52760973	0.0108	401577	ad	TRUE	reported	19	2.08e-15	0.03839	1633	53264226	ebi-a-GCST90001948	CD33 on CD33dim HLA DR+ CD11b+	TRUE	reported	igd	2	TRUE	NA
rs4802858	C	T	C	T	-0.2061	-0.0111	0.5707	NA	FALSE	FALSE	FALSE	0rL0q8	0.2051	19	51749897	0.0088	401577	ad	TRUE	reported	19	1.33e-08	0.03609	1633	52253150	ebi-a-GCST90001948	CD33 on CD33dim HLA DR+ CD11b+	TRUE	reported	igd	2	TRUE	NA
rs558625031	A	G	A	G	-0.675	-0.0257	0.0484	NA	FALSE	FALSE	FALSE	0rL0q8	0.4097	19	51355657	0.0312	393797	ad	TRUE	reported	19	2.01e-16	0.08124	1633	51858911	ebi-a-GCST90001948	CD33 on CD33dim HLA DR+ CD11b+	TRUE	reported	igd	2	TRUE	NA
rs7351079	G	A	G	A	-0.3895	-0.0064	0.271	NA	FALSE	FALSE	FALSE	0rL0q8	0.6025	19	51070781	0.0122	401577	ad	TRUE	reported	19	8.18e-22	0.04	1633	51574038	ebi-a-GCST90001948	CD33 on CD33dim HLA DR+ CD11b+	TRUE	reported	igd	2	TRUE	NA
rs78949787	T	C	T	C	0.2922	-0.0022	0.5533	NA	FALSE	FALSE	FALSE	0rL0q8	0.8135	19	51087881	0.0094	400902	ad	TRUE	reported	19	5.83e-16	0.03574	1633	51591138	ebi-a-GCST90001948	CD33 on CD33dim HLA DR+ CD11b+	TRUE	reported	igd	2	TRUE	NA
rs7245846	A	G	A	G	-0.8358	-0.0284	0.1853	NA	FALSE	FALSE	FALSE	QZqmuw	0.002075	19	51227920	0.0092	401577	ad	TRUE	reported	1.02e-58	0.04903	19	51731176	1244	ebi-a-GCST90001950	CD33 on Granulocytic Myeloid-Derived Suppressor Cells	TRUE	reported	igd	2	TRUE	NA
rs7351079	G	A	G	A	-0.2821	-0.0064	0.2544	NA	FALSE	FALSE	FALSE	QZqmuw	0.6025	19	51070781	0.0122	401577	ad	TRUE	reported	5.38e-09	0.048	19	51574038	1244	ebi-a-GCST90001950	CD33 on Granulocytic Myeloid-Derived Suppressor Cells	TRUE	reported	igd	2	TRUE	NA
rs78949787	T	C	T	C	0.2277	-0.0022	0.5691	NA	FALSE	FALSE	FALSE	QZqmuw	0.8135	19	51087881	0.0094	400902	ad	TRUE	reported	3.22e-08	0.04091	19	51591138	1244	ebi-a-GCST90001950	CD33 on Granulocytic Myeloid-Derived Suppressor Cells	TRUE	reported	igd	2	TRUE	NA
rs12459503	C	T	C	T	0.2704	-0.0037	0.7148	NA	FALSE	FALSE	FALSE	GaEF7s	0.678	19	51657782	0.009	401577	ad	TRUE	reported	52161035	1464	0.04205	1.74e-10	19	ebi-a-GCST90001951	CD33 on CD66b++ myeloid cell	TRUE	reported	igd	2	TRUE	NA
rs3865444	A	C	A	C	-0.9497	-0.0337	0.2094	NA	FALSE	FALSE	FALSE	GaEF7s	0.00031	19	51224706	0.0093	401577	ad	TRUE	reported	51727962	1464	0.0394	2.39e-108	19	ebi-a-GCST90001951	CD33 on CD66b++ myeloid cell	TRUE	reported	igd	2	TRUE	NA
rs4310975	A	G	A	G	-0.2632	0.0013	0.2964	NA	FALSE	FALSE	FALSE	GaEF7s	0.9036	19	52760973	0.0108	401577	ad	TRUE	reported	53264226	1464	0.04133	2.53e-10	19	ebi-a-GCST90001951	CD33 on CD66b++ myeloid cell	TRUE	reported	igd	2	TRUE	NA
rs558625031	A	G	A	G	-0.6061	-0.0257	0.0499	NA	FALSE	FALSE	FALSE	GaEF7s	0.4097	19	51355657	0.0312	393797	ad	TRUE	reported	51858911	1464	0.08664	4.02e-12	19	ebi-a-GCST90001951	CD33 on CD66b++ myeloid cell	TRUE	reported	igd	2	TRUE	NA
rs7351079	G	A	G	A	-0.3103	-0.0064	0.2702	NA	FALSE	FALSE	FALSE	GaEF7s	0.6025	19	51070781	0.0122	401577	ad	TRUE	reported	51574038	1464	0.04316	1.04e-12	19	ebi-a-GCST90001951	CD33 on CD66b++ myeloid cell	TRUE	reported	igd	2	TRUE	NA
rs78949787	T	C	T	C	0.2681	-0.0022	0.5574	NA	FALSE	FALSE	FALSE	GaEF7s	0.8135	19	51087881	0.0094	400902	ad	TRUE	reported	51591138	1464	0.03799	2.62e-12	19	ebi-a-GCST90001951	CD33 on CD66b++ myeloid cell	TRUE	reported	igd	2	TRUE	NA
rs3865444	A	C	A	C	-1.151	-0.0337	0.1896	NA	FALSE	FALSE	FALSE	i5aD0o	0.00031	19	51224706	0.0093	401577	ad	TRUE	reported	1569	51727962	1.71e-153	19	0.03884	ebi-a-GCST90001952	CD33 on Monocytic Myeloid-Derived Suppressor Cells	TRUE	reported	igd	2	TRUE	NA
rs4310975	A	G	A	G	-0.2846	0.0013	0.2874	NA	FALSE	FALSE	FALSE	i5aD0o	0.9036	19	52760973	0.0108	401577	ad	TRUE	reported	1569	53264226	2.77e-12	19	0.0404	ebi-a-GCST90001952	CD33 on Monocytic Myeloid-Derived Suppressor Cells	TRUE	reported	igd	2	TRUE	NA
rs58301181	G	C	G	C	-0.3795	0.0191	0.0848	NA	FALSE	TRUE	TRUE	i5aD0o	0.1783	19	51594008	0.0142	401577	ad	TRUE	reported	1569	52097261	1.94e-08	19	0.06721	ebi-a-GCST90001952	CD33 on Monocytic Myeloid-Derived Suppressor Cells	TRUE	reported	igd	2	FALSE	NA
rs62114147	T	C	T	C	0.2625	0.0007	0.5586	NA	FALSE	FALSE	FALSE	i5aD0o	0.9424	19	51084761	0.0092	400902	ad	TRUE	reported	1569	51588018	2.56e-12	19	0.03721	ebi-a-GCST90001952	CD33 on Monocytic Myeloid-Derived Suppressor Cells	TRUE	reported	igd	2	TRUE	NA
rs7351079	G	A	G	A	-0.3677	-0.0064	0.2604	NA	FALSE	FALSE	FALSE	i5aD0o	0.6025	19	51070781	0.0122	401577	ad	TRUE	reported	1569	51574038	9.03e-18	19	0.04232	ebi-a-GCST90001952	CD33 on Monocytic Myeloid-Derived Suppressor Cells	TRUE	reported	igd	2	TRUE	NA
rs2569437	T	A	T	A	-0.3177	0.0051	0.8691	NA	FALSE	TRUE	TRUE	1GCduf	0.7568	19	51111997	0.0166	393797	ad	TRUE	reported	1.25e-08	51615254	0.05551	19	1558	ebi-a-GCST90001953	CD33 on CD33dim HLA DR-	TRUE	reported	igd	2	FALSE	NA
rs3865444	A	C	A	C	-1.138	-0.0337	0.1845	NA	FALSE	FALSE	FALSE	1GCduf	0.00031	19	51224706	0.0093	401577	ad	TRUE	reported	2.6e-145	51727962	0.03974	19	1558	ebi-a-GCST90001953	CD33 on CD33dim HLA DR-	TRUE	reported	igd	2	TRUE	NA
rs4310975	A	G	A	G	-0.2784	0.0013	0.2856	NA	FALSE	FALSE	FALSE	1GCduf	0.9036	19	52760973	0.0108	401577	ad	TRUE	reported	6.78e-12	53264226	0.04026	19	1558	ebi-a-GCST90001953	CD33 on CD33dim HLA DR-	TRUE	reported	igd	2	TRUE	NA
rs56043070	A	G	A	G	0.5006	0.0011	0.0565	NA	FALSE	FALSE	FALSE	1GCduf	0.9464	1	247556467	0.0162	401577	ad	TRUE	reported	2.26e-10	247719769	0.0784	1	1558	ebi-a-GCST90001953	CD33 on CD33dim HLA DR-	TRUE	reported	igd	2	TRUE	NA
rs7351079	G	A	G	A	-0.3645	-0.0064	0.258	NA	FALSE	FALSE	FALSE	1GCduf	0.6025	19	51070781	0.0122	401577	ad	TRUE	reported	1.15e-17	51574038	0.04209	19	1558	ebi-a-GCST90001953	CD33 on CD33dim HLA DR-	TRUE	reported	igd	2	TRUE	NA
rs75773078	A	G	A	G	-0.4918	0.0069	0.0709	NA	FALSE	FALSE	FALSE	1GCduf	0.6823	19	51238890	0.017	401577	ad	TRUE	reported	4.12e-12	51742145	0.07038	19	1558	ebi-a-GCST90001953	CD33 on CD33dim HLA DR-	TRUE	reported	igd	2	TRUE	NA
rs3865444	A	C	A	C	-1.219	-0.0337	0.1938	NA	FALSE	FALSE	FALSE	p4fBMo	0.00031	19	51224706	0.0093	401577	ad	TRUE	reported	2.81e-187	51727962	19	0.03627	1579	ebi-a-GCST90001956	CD33 on CD33+ HLA DR+	TRUE	reported	igd	2	TRUE	NA
rs4310975	A	G	A	G	-0.2753	0.0013	0.2878	NA	FALSE	FALSE	FALSE	p4fBMo	0.9036	19	52760973	0.0108	401577	ad	TRUE	reported	1.21e-11	53264226	19	0.04031	1579	ebi-a-GCST90001956	CD33 on CD33+ HLA DR+	TRUE	reported	igd	2	TRUE	NA
rs558625031	A	G	A	G	-0.7095	-0.0257	0.0475	NA	FALSE	FALSE	FALSE	p4fBMo	0.4097	19	51355657	0.0312	393797	ad	TRUE	reported	1.33e-16	51858911	19	0.08484	1579	ebi-a-GCST90001956	CD33 on CD33+ HLA DR+	TRUE	reported	igd	2	TRUE	NA
rs58301181	G	C	G	C	-0.4318	0.0191	0.0842	NA	FALSE	TRUE	TRUE	p4fBMo	0.1783	19	51594008	0.0142	401577	ad	TRUE	reported	1.94e-10	52097261	19	0.06738	1579	ebi-a-GCST90001956	CD33 on CD33+ HLA DR+	TRUE	reported	igd	2	FALSE	NA
rs7351079	G	A	G	A	-0.3366	-0.0064	0.2619	NA	FALSE	FALSE	FALSE	p4fBMo	0.6025	19	51070781	0.0122	401577	ad	TRUE	reported	2.54e-15	51574038	19	0.04212	1579	ebi-a-GCST90001956	CD33 on CD33+ HLA DR+	TRUE	reported	igd	2	TRUE	NA
rs78949787	T	C	T	C	0.2938	-0.0022	0.5592	NA	FALSE	FALSE	FALSE	p4fBMo	0.8135	19	51087881	0.0094	400902	ad	TRUE	reported	3.54e-15	51591138	19	0.03696	1579	ebi-a-GCST90001956	CD33 on CD33+ HLA DR+	TRUE	reported	igd	2	TRUE	NA
rs3865444	A	C	A	C	-1.223	-0.0337	0.1936	NA	FALSE	FALSE	FALSE	NhNQ9w	0.00031	19	51224706	0.0093	401577	ad	TRUE	reported	1578	9.18e-189	0.0362	19	51727962	ebi-a-GCST90001957	CD33 on CD33+ HLA DR+ CD14-	TRUE	reported	igd	2	TRUE	NA
rs4310975	A	G	A	G	-0.2765	0.0013	0.2877	NA	FALSE	FALSE	FALSE	NhNQ9w	0.9036	19	52760973	0.0108	401577	ad	TRUE	reported	1578	9.73e-12	0.04029	19	53264226	ebi-a-GCST90001957	CD33 on CD33+ HLA DR+ CD14-	TRUE	reported	igd	2	TRUE	NA
rs558625031	A	G	A	G	-0.7209	-0.0257	0.0475	NA	FALSE	FALSE	FALSE	NhNQ9w	0.4097	19	51355657	0.0312	393797	ad	TRUE	reported	1578	4.46e-17	0.08485	19	51858911	ebi-a-GCST90001957	CD33 on CD33+ HLA DR+ CD14-	TRUE	reported	igd	2	TRUE	NA
rs58301181	G	C	G	C	-0.4433	0.0191	0.0843	NA	FALSE	TRUE	TRUE	NhNQ9w	0.1783	19	51594008	0.0142	401577	ad	TRUE	reported	1578	6.49e-11	0.0674	19	52097261	ebi-a-GCST90001957	CD33 on CD33+ HLA DR+ CD14-	TRUE	reported	igd	2	FALSE	NA
rs7351079	G	A	G	A	-0.3413	-0.0064	0.2617	NA	FALSE	FALSE	FALSE	NhNQ9w	0.6025	19	51070781	0.0122	401577	ad	TRUE	reported	1578	1.07e-15	0.04213	19	51574038	ebi-a-GCST90001957	CD33 on CD33+ HLA DR+ CD14-	TRUE	reported	igd	2	TRUE	NA
rs78949787	T	C	T	C	0.2935	-0.0022	0.5596	NA	FALSE	FALSE	FALSE	NhNQ9w	0.8135	19	51087881	0.0094	400902	ad	TRUE	reported	1578	4.12e-15	0.03701	19	51591138	ebi-a-GCST90001957	CD33 on CD33+ HLA DR+ CD14-	TRUE	reported	igd	2	TRUE	NA
rs13191523	G	A	G	A	0.2769	0.0505	0.1118	NA	FALSE	FALSE	FALSE	CbbLT7	0.04116	6	31041317	0.0247	400902	ad	TRUE	reported	0.04585	6	31009094	1.73e-09	3113	ebi-a-GCST90001973	FSC-A on CD4+ T cell	TRUE	reported	igd	2	TRUE	NA
rs7745305	C	T	C	T	0.2065	0.0382	0.1635	NA	FALSE	FALSE	FALSE	CbbLT7	0.0279	6	30945698	0.0174	394202	ad	TRUE	reported	0.03765	6	30913475	4.51e-08	3113	ebi-a-GCST90001973	FSC-A on CD4+ T cell	TRUE	reported	igd	2	TRUE	NA
rs9271673	G	C	G	C	-0.2096	-0.0199	0.7652	NA	FALSE	TRUE	TRUE	CbbLT7	0.0613	6	32625056	0.0106	394877	ad	TRUE	reported	0.03281	6	32592833	1.93e-10	3113	ebi-a-GCST90001973	FSC-A on CD4+ T cell	TRUE	reported	igd	2	FALSE	NA
rs1345228	G	A	G	A	-0.2042	0.0248	0.2633	NA	FALSE	FALSE	FALSE	y3mVKk	0.02501	6	29464613	0.0111	394877	ad	TRUE	reported	6	3629	29432390	3.68e-10	0.03249	ebi-a-GCST90001988	HLA DR on CD14+ CD16- monocyte	TRUE	reported	igd	2	TRUE	NA
rs17875358	A	C	A	C	-0.2014	0.0122	0.2346	NA	FALSE	FALSE	FALSE	y3mVKk	0.4281	6	30486948	0.0154	394877	ad	TRUE	reported	6	3629	30454725	3.45e-08	0.03643	ebi-a-GCST90001988	HLA DR on CD14+ CD16- monocyte	TRUE	reported	igd	2	TRUE	NA
rs1800973	A	C	A	C	-0.3123	0.0005	0.0798	NA	FALSE	FALSE	FALSE	y3mVKk	0.9763	12	69350234	0.0165	401577	ad	TRUE	reported	12	3629	69744014	1.06e-11	0.04579	ebi-a-GCST90001988	HLA DR on CD14+ CD16- monocyte	TRUE	reported	igd	2	TRUE	NA
rs1887340	T	C	T	C	0.2236	-0.0105	0.2258	NA	FALSE	FALSE	FALSE	y3mVKk	0.268	6	33762318	0.0095	401577	ad	TRUE	reported	6	3629	33730095	1.05e-12	0.03127	ebi-a-GCST90001988	HLA DR on CD14+ CD16- monocyte	TRUE	reported	igd	2	TRUE	NA
rs2734573	A	C	A	C	-0.2641	0.0059	0.5397	NA	FALSE	FALSE	FALSE	y3mVKk	0.4676	6	31526961	0.0082	400902	ad	TRUE	reported	6	3629	31494738	9.78e-21	0.02811	ebi-a-GCST90001988	HLA DR on CD14+ CD16- monocyte	TRUE	reported	igd	2	TRUE	NA
rs80032720	A	G	A	G	0.4253	-0.0133	0.0733	NA	FALSE	FALSE	FALSE	y3mVKk	0.6442	6	32417156	0.0288	394472	ad	TRUE	reported	6	3629	32384933	7.76e-15	0.0545	ebi-a-GCST90001988	HLA DR on CD14+ CD16- monocyte	TRUE	reported	igd	2	TRUE	NA
rs9266382	C	A	C	A	-0.2464	-0.0001	0.35	NA	FALSE	FALSE	FALSE	y3mVKk	0.9942	6	31367100	0.01	400902	ad	TRUE	reported	6	3629	31334877	1.07e-15	0.03059	ebi-a-GCST90001988	HLA DR on CD14+ CD16- monocyte	TRUE	reported	igd	2	TRUE	NA
rs9461932	C	T	C	T	-0.158	0.0127	0.5868	NA	FALSE	FALSE	FALSE	y3mVKk	0.1259	6	33931111	0.0083	400902	ad	TRUE	reported	6	3629	33898888	2.06e-09	0.0263	ebi-a-GCST90001988	HLA DR on CD14+ CD16- monocyte	TRUE	reported	igd	2	TRUE	NA
rs9469245	T	C	T	C	-0.2672	0.0202	0.5433	NA	FALSE	FALSE	FALSE	y3mVKk	0.01579	6	32724307	0.0083	400902	ad	TRUE	reported	6	3629	32692084	2.52e-21	0.02801	ebi-a-GCST90001988	HLA DR on CD14+ CD16- monocyte	TRUE	reported	igd	2	TRUE	NA
rs1345228	G	A	G	A	-0.2006	0.0248	0.2633	NA	FALSE	FALSE	FALSE	bwSfJu	0.02501	6	29464613	0.0111	394877	ad	TRUE	reported	3629	0.03252	7.64e-10	6	29432390	ebi-a-GCST90001991	HLA DR on CD14+ monocyte	TRUE	reported	igd	2	TRUE	NA
rs1800973	A	C	A	C	-0.315	0.0005	0.0798	NA	FALSE	FALSE	FALSE	bwSfJu	0.9763	12	69350234	0.0165	401577	ad	TRUE	reported	3629	0.04587	7.74e-12	12	69744014	ebi-a-GCST90001991	HLA DR on CD14+ monocyte	TRUE	reported	igd	2	TRUE	NA
rs1887340	T	C	T	C	0.2158	-0.0105	0.2258	NA	FALSE	FALSE	FALSE	bwSfJu	0.268	6	33762318	0.0095	401577	ad	TRUE	reported	3629	0.03133	6.67e-12	6	33730095	ebi-a-GCST90001991	HLA DR on CD14+ monocyte	TRUE	reported	igd	2	TRUE	NA
rs2734573	A	C	A	C	-0.2576	0.0059	0.5397	NA	FALSE	FALSE	FALSE	bwSfJu	0.4676	6	31526961	0.0082	400902	ad	TRUE	reported	3629	0.02816	9.53e-20	6	31494738	ebi-a-GCST90001991	HLA DR on CD14+ monocyte	TRUE	reported	igd	2	TRUE	NA
rs80032720	A	G	A	G	0.4142	-0.0133	0.0733	NA	FALSE	FALSE	FALSE	bwSfJu	0.6442	6	32417156	0.0288	394472	ad	TRUE	reported	3629	0.05456	3.97e-14	6	32384933	ebi-a-GCST90001991	HLA DR on CD14+ monocyte	TRUE	reported	igd	2	TRUE	NA
rs9266382	C	A	C	A	-0.2344	-0.0001	0.35	NA	FALSE	FALSE	FALSE	bwSfJu	0.9942	6	31367100	0.01	400902	ad	TRUE	reported	3629	0.03064	2.55e-14	6	31334877	ebi-a-GCST90001991	HLA DR on CD14+ monocyte	TRUE	reported	igd	2	TRUE	NA
rs9461932	C	T	C	T	-0.1585	0.0127	0.5868	NA	FALSE	FALSE	FALSE	bwSfJu	0.1259	6	33931111	0.0083	400902	ad	TRUE	reported	3629	0.02634	1.96e-09	6	33898888	ebi-a-GCST90001991	HLA DR on CD14+ monocyte	TRUE	reported	igd	2	TRUE	NA
rs9469245	T	C	T	C	-0.2607	0.0202	0.5433	NA	FALSE	FALSE	FALSE	bwSfJu	0.01579	6	32724307	0.0083	400902	ad	TRUE	reported	3629	0.02805	2.56e-20	6	32692084	ebi-a-GCST90001991	HLA DR on CD14+ monocyte	TRUE	reported	igd	2	TRUE	NA
rs1345228	G	A	G	A	-0.1958	0.0248	0.2633	NA	FALSE	FALSE	FALSE	lxjzDn	0.02501	6	29464613	0.0111	394877	ad	TRUE	reported	0.03223	1.37e-09	6	29432390	3629	ebi-a-GCST90002010	HLA DR on monocyte	TRUE	reported	igd	2	TRUE	NA
rs1800973	A	C	A	C	-0.2562	0.0005	0.0798	NA	FALSE	FALSE	FALSE	lxjzDn	0.9763	12	69350234	0.0165	401577	ad	TRUE	reported	0.04587	2.51e-08	12	69744014	3629	ebi-a-GCST90002010	HLA DR on monocyte	TRUE	reported	igd	2	TRUE	NA
rs1887340	T	C	T	C	0.21	-0.0105	0.2258	NA	FALSE	FALSE	FALSE	lxjzDn	0.268	6	33762318	0.0095	401577	ad	TRUE	reported	0.03115	1.83e-11	6	33730095	3629	ebi-a-GCST90002010	HLA DR on monocyte	TRUE	reported	igd	2	TRUE	NA
rs2254847	T	A	T	A	-0.2473	-0.0212	0.2819	NA	FALSE	TRUE	TRUE	lxjzDn	0.2906	6	30966071	0.0201	394202	ad	TRUE	reported	0.03256	3.85e-14	6	30933848	3629	ebi-a-GCST90002010	HLA DR on monocyte	TRUE	reported	igd	2	FALSE	NA
rs2734573	A	C	A	C	-0.2564	0.0059	0.5397	NA	FALSE	FALSE	FALSE	lxjzDn	0.4676	6	31526961	0.0082	400902	ad	TRUE	reported	0.02792	6.91e-20	6	31494738	3629	ebi-a-GCST90002010	HLA DR on monocyte	TRUE	reported	igd	2	TRUE	NA
rs72502555	G	C	G	C	0.2088	0.0314	0.2656	NA	FALSE	TRUE	TRUE	lxjzDn	0.04317	6	31266431	0.0155	400902	ad	TRUE	reported	0.03204	8.18e-11	6	31234208	3629	ebi-a-GCST90002010	HLA DR on monocyte	TRUE	reported	igd	2	FALSE	NA
rs80032720	A	G	A	G	0.376	-0.0133	0.0733	NA	FALSE	FALSE	FALSE	lxjzDn	0.6442	6	32417156	0.0288	394472	ad	TRUE	reported	0.05411	4.35e-12	6	32384933	3629	ebi-a-GCST90002010	HLA DR on monocyte	TRUE	reported	igd	2	TRUE	NA
rs9270588	T	C	T	C	-0.5388	0.0184	0.5834	NA	FALSE	FALSE	FALSE	lxjzDn	0.02781	6	32593550	0.0083	394877	ad	TRUE	reported	0.02808	3.21e-78	6	32561327	3629	ebi-a-GCST90002010	HLA DR on monocyte	TRUE	reported	igd	2	TRUE	NA
rs9461932	C	T	C	T	-0.1702	0.0127	0.5868	NA	FALSE	FALSE	FALSE	lxjzDn	0.1259	6	33931111	0.0083	400902	ad	TRUE	reported	0.0262	9.4e-11	6	33898888	3629	ebi-a-GCST90002010	HLA DR on monocyte	TRUE	reported	igd	2	TRUE	NA
rs9469245	T	C	T	C	-0.2618	0.0202	0.5433	NA	FALSE	FALSE	FALSE	lxjzDn	0.01579	6	32724307	0.0083	400902	ad	TRUE	reported	0.02781	8.23e-21	6	32692084	3629	ebi-a-GCST90002010	HLA DR on monocyte	TRUE	reported	igd	2	TRUE	NA
rs111695695	A	C	A	C	0.3963	-0.0119	0.0772	NA	FALSE	FALSE	FALSE	cu9Fzx	0.7002	19	51394506	0.0308	400497	ad	TRUE	reported	19	1555	1.38e-08	51897760	0.06945	ebi-a-GCST90002052	CD45 on Immature Myeloid-Derived Suppressor Cells	TRUE	reported	igd	2	TRUE	NA
rs273640	T	G	T	G	-0.5579	0.0386	0.5441	NA	FALSE	FALSE	FALSE	cu9Fzx	1.26e-05	19	51222568	0.0088	401577	ad	TRUE	reported	19	1555	1.22e-50	51725824	0.03593	ebi-a-GCST90002052	CD45 on Immature Myeloid-Derived Suppressor Cells	TRUE	reported	igd	2	TRUE	NA
rs113243185	C	G	C	G	0.2404	-0.0235	0.2014	NA	FALSE	TRUE	TRUE	rgTAxh	0.06371	6	32617294	0.0127	394472	ad	TRUE	reported	3113	1.39e-10	32585071	6	0.03733	ebi-a-GCST90002081	SSC-A on CD4+ T cell	TRUE	reported	igd	2	FALSE	NA
rs13191523	G	A	G	A	0.2943	0.0505	0.1118	NA	FALSE	FALSE	FALSE	rgTAxh	0.04116	6	31041317	0.0247	400902	ad	TRUE	reported	3113	8.66e-10	31009094	6	0.04784	ebi-a-GCST90002081	SSC-A on CD4+ T cell	TRUE	reported	igd	2	TRUE	NA
rs7745305	C	T	C	T	0.2391	0.0382	0.1635	NA	FALSE	FALSE	FALSE	rgTAxh	0.0279	6	30945698	0.0174	394202	ad	TRUE	reported	3113	1.06e-09	30913475	6	0.03907	ebi-a-GCST90002081	SSC-A on CD4+ T cell	TRUE	reported	igd	2	TRUE	NA
rs9271536	T	A	T	A	-0.2591	-0.0217	0.7772	NA	FALSE	TRUE	TRUE	rgTAxh	0.04238	6	32622201	0.0107	394472	ad	TRUE	reported	3113	8.85e-14	32589978	6	0.03458	ebi-a-GCST90002081	SSC-A on CD4+ T cell	TRUE	reported	igd	2	FALSE	NA
rs9501063	C	G	C	G	0.2599	0.0114	0.1258	NA	FALSE	TRUE	TRUE	rgTAxh	0.6162	6	31166117	0.0227	400902	ad	TRUE	reported	3113	1.06e-08	31133894	6	0.04531	ebi-a-GCST90002081	SSC-A on CD4+ T cell	TRUE	reported	igd	2	FALSE	NA
rs111628921	C	T	C	T	0.3323	-0.0017	0.0703	NA	FALSE	FALSE	FALSE	6KBOZD	0.9571	6	26299646	0.0323	401172	ad	TRUE	reported	0.05873	26299874	2872	6	1.68e-08	ebi-a-GCST90002104	HLA DR on myeloid Dendritic Cell	TRUE	reported	igd	2	TRUE	NA
rs113784283	A	G	A	G	0.645	-0.0012	0.0439	NA	FALSE	FALSE	FALSE	6KBOZD	0.9688	6	30597609	0.0294	393797	ad	TRUE	reported	0.0768	30565386	2872	6	7.03e-17	ebi-a-GCST90002104	HLA DR on myeloid Dendritic Cell	TRUE	reported	igd	2	TRUE	NA
rs114476648	C	T	C	T	0.4996	0.1651	0.0442	NA	FALSE	FALSE	FALSE	6KBOZD	0.3986	6	27666023	0.1956	367064	ad	TRUE	reported	0.07493	27633802	2872	6	3.11e-11	ebi-a-GCST90002104	HLA DR on myeloid Dendritic Cell	TRUE	reported	igd	2	TRUE	NA
rs11551421	A	G	A	G	0.4559	0.0284	0.1083	NA	FALSE	FALSE	FALSE	6KBOZD	0.1657	6	33085832	0.0205	400902	ad	TRUE	reported	0.04761	33053609	2872	6	2.11e-21	ebi-a-GCST90002104	HLA DR on myeloid Dendritic Cell	TRUE	reported	igd	2	TRUE	NA
rs116007826	G	A	G	A	0.8001	-0.0308	0.0686	NA	FALSE	FALSE	FALSE	6KBOZD	0.4664	6	31601968	0.0423	398536	ad	TRUE	reported	0.06015	31569745	2872	6	3.14e-39	ebi-a-GCST90002104	HLA DR on myeloid Dendritic Cell	TRUE	reported	igd	2	TRUE	NA
rs146328993	A	G	A	G	0.3691	-0.0477	0.0851	NA	FALSE	FALSE	FALSE	6KBOZD	0.05348	6	28883031	0.0247	394877	ad	TRUE	reported	0.05434	28850808	2872	6	1.33e-11	ebi-a-GCST90002104	HLA DR on myeloid Dendritic Cell	TRUE	reported	igd	2	TRUE	NA
rs238873	G	A	G	A	0.7077	0.0449	0.0399	NA	FALSE	FALSE	FALSE	6KBOZD	0.2146	6	29383864	0.0361	394472	ad	TRUE	reported	0.08044	29351641	2872	6	2.36e-18	ebi-a-GCST90002104	HLA DR on myeloid Dendritic Cell	TRUE	reported	igd	2	TRUE	NA
rs35525122	A	C	A	C	0.8525	-0.0956	0.1179	NA	FALSE	FALSE	FALSE	6KBOZD	3.13e-17	6	32593506	0.0113	394472	ad	TRUE	reported	0.04857	32561283	2872	6	1.39e-65	ebi-a-GCST90002104	HLA DR on myeloid Dendritic Cell	TRUE	reported	igd	2	TRUE	NA
rs42362	C	G	C	G	0.1935	0.0192	0.2639	NA	FALSE	TRUE	TRUE	6KBOZD	0.01906	16	9344506	0.0082	401577	ad	TRUE	reported	0.0318	9438363	2872	16	1.31e-09	ebi-a-GCST90002104	HLA DR on myeloid Dendritic Cell	TRUE	reported	igd	2	FALSE	NA
rs55971447	T	C	T	C	-0.4802	0.0262	0.2371	NA	FALSE	FALSE	FALSE	6KBOZD	0.03371	1	161545536	0.0124	401577	ad	TRUE	reported	0.03135	161515326	2872	1	5.94e-51	ebi-a-GCST90002104	HLA DR on myeloid Dendritic Cell	TRUE	reported	igd	2	TRUE	NA
rs9267325	C	G	C	G	-0.2882	-0.0073	0.2617	NA	FALSE	TRUE	TRUE	6KBOZD	0.5371	6	31493715	0.0118	400902	ad	TRUE	reported	0.03756	31461492	2872	6	2.31e-14	ebi-a-GCST90002104	HLA DR on myeloid Dendritic Cell	TRUE	reported	igd	2	FALSE	NA
rs942495	T	C	T	C	0.3257	0.0097	0.0872	NA	FALSE	FALSE	FALSE	6KBOZD	0.574	6	33830803	0.0173	401577	ad	TRUE	reported	0.05248	33798580	2872	6	6.2e-10	ebi-a-GCST90002104	HLA DR on myeloid Dendritic Cell	TRUE	reported	igd	2	TRUE	NA

## Sheet: Supplementary Table 2
Supplementary Table 2: MR results of all immune traits identified in different MR methods derived from European Alzheimer’s and Dementia Biobank (EADB).
id.exposure	id.outcome	outcome	exposure	method	nsnp	b	se	pval	lo_ci	up_ci	or	or_lci95	or_uci95
ebi-a-GCST90001392	EsDtCu	ad	IgD+ CD38+ B cell Absolute Count	Inverse variance weighted	2	-0.0063211	0.0547617	0.908105	-0.113654	0.101012	0.993699	0.892567	1.10629
ebi-a-GCST90001398	fax92k	ad	Unswitched memory B cell Absolute Count	Inverse variance weighted	2	0.0527464	0.268442	0.844226	-0.4734	0.578893	1.05416	0.622881	1.78406
ebi-a-GCST90001399	Ure4zi	ad	IgD- CD27- B cell %B cell	Inverse variance weighted	3	0.00571299	0.0268943	0.831776	-0.0469998	0.0584257	1.00573	0.954088	1.06017
ebi-a-GCST90001401	PBgnVd	ad	IgD- CD27- B cell Absolute Count	Inverse variance weighted	2	-0.033282	0.0281211	0.236602	-0.0883994	0.0218354	0.967266	0.915395	1.02208
ebi-a-GCST90001417	WXoBE0	ad	CD24+ CD27+ B cell %B cell	Inverse variance weighted	3	0.11586	0.0552342	0.0359394	0.0076009	0.224119	1.12284	1.00763	1.25122
ebi-a-GCST90001424	o4cpGm	ad	IgD+ B cell %Lymphocyte	Inverse variance weighted	2	0.0585275	0.153767	0.703482	-0.242856	0.359911	1.06027	0.784384	1.4332
ebi-a-GCST90001426	UP7M5m	ad	IgD- CD38dim B cell %lymphocyte	Inverse variance weighted	2	-0.0329653	0.0493497	0.504138	-0.129691	0.0637601	0.967572	0.878367	1.06584
ebi-a-GCST90001432	7MpxWk	ad	Unswitched memory B cell %lymphocyte	Inverse variance weighted	3	0.00135598	0.112635	0.990395	-0.219409	0.222121	1.00136	0.802993	1.24872
ebi-a-GCST90001433	BdAkqT	ad	IgD- CD27- B cell %lymphocyte	Inverse variance weighted	2	0.023507	0.0276887	0.395894	-0.0307627	0.0777768	1.02379	0.969706	1.08088
ebi-a-GCST90001434	Axw6QC	ad	Switched memory B cell %lymphocyte	Inverse variance weighted	3	0.0180021	0.115935	0.876602	-0.20923	0.245234	1.01817	0.811209	1.27792
ebi-a-GCST90001436	UgPNXO	ad	Memory B cell %lymphocyte	Inverse variance weighted	2	0.0980407	0.207502	0.636583	-0.308663	0.504744	1.10301	0.734428	1.65656
ebi-a-GCST90001439	j2IWvK	ad	IgD+ CD24+ B cell %lymphocyte	Inverse variance weighted	2	0.0657982	0.170878	0.700193	-0.269122	0.400718	1.06801	0.76405	1.4929
ebi-a-GCST90001442	erehYt	ad	CD24+ CD27+ B cell %lymphocyte	Inverse variance weighted	3	0.110552	0.130641	0.397428	-0.145505	0.366609	1.11689	0.864585	1.44283
ebi-a-GCST90001450	lFzJXO	ad	CD62L- monocyte Absolute Count	Inverse variance weighted	4	-0.00559258	0.0352292	0.873867	-0.0746418	0.0634567	0.994423	0.928076	1.06551
ebi-a-GCST90001451	fbksmE	ad	CD62L- monocyte %monocyte	Inverse variance weighted	3	0.00895745	0.0212676	0.673626	-0.0327271	0.050642	1.009	0.967803	1.05195
ebi-a-GCST90001458	YG2GQg	ad	Myeloid Dendritic Cell Absolute Count	Inverse variance weighted	5	0.0249626	0.0275687	0.365217	-0.029072	0.0789971	1.02528	0.971347	1.0822
ebi-a-GCST90001459	SK0L4r	ad	Myeloid Dendritic Cell %Dendritic Cell	Inverse variance weighted	2	0.0405273	0.0192999	0.0357404	0.00269945	0.0783551	1.04136	1.0027	1.08151
ebi-a-GCST90001461	ljA0UQ	ad	Dendritic Cell Absolute Count	Inverse variance weighted	2	0.0228904	0.0594918	0.700411	-0.0937136	0.139494	1.02315	0.910544	1.14969
ebi-a-GCST90001462	NY4XdH	ad	CD62L- Dendritic Cell Absolute Count	Inverse variance weighted	4	0.0250371	0.0274039	0.360909	-0.0286744	0.0787487	1.02535	0.971733	1.08193
ebi-a-GCST90001463	qIqsZF	ad	CD62L- Dendritic Cell %Dendritic Cell	Inverse variance weighted	3	-0.0434471	0.0349496	0.213819	-0.111948	0.0250542	0.957483	0.89409	1.02537
ebi-a-GCST90001464	8VmkKc	ad	CD86+ myeloid Dendritic Cell Absolute Count	Inverse variance weighted	4	0.0229716	0.0216817	0.289376	-0.0195245	0.0654677	1.02324	0.980665	1.06766
ebi-a-GCST90001465	3E78En	ad	CD86+ myeloid Dendritic Cell %Dendritic Cell	Inverse variance weighted	4	0.0257971	0.0208798	0.216642	-0.0151272	0.0667214	1.02613	0.984987	1.069
ebi-a-GCST90001468	VomKYe	ad	CD62L- myeloid Dendritic Cell Absolute Count	Inverse variance weighted	6	0.0208	0.0201122	0.301042	-0.0186198	0.0602199	1.02102	0.981552	1.06207
ebi-a-GCST90001469	4FtSit	ad	CD62L- myeloid Dendritic Cell %Dendritic Cell	Inverse variance weighted	7	0.00930848	0.0154499	0.546845	-0.0209733	0.0395902	1.00935	0.979245	1.04038
ebi-a-GCST90001470	w4WQcG	ad	CD62L- plasmacytoid Dendritic Cell Absolute Count	Inverse variance weighted	2	-0.00109392	0.0302117	0.971116	-0.0603088	0.058121	0.998907	0.941474	1.05984
ebi-a-GCST90001471	A1tSgF	ad	CD62L- plasmacytoid Dendritic Cell %Dendritic Cell	Inverse variance weighted	3	-0.0281511	0.0283809	0.321245	-0.0837778	0.0274755	0.972241	0.919636	1.02786
ebi-a-GCST90001472	oGolpf	ad	CD62L- CD86+ myeloid Dendritic Cell Absolute Count	Inverse variance weighted	5	0.0143379	0.016471	0.384029	-0.0179452	0.046621	1.01444	0.982215	1.04772
ebi-a-GCST90001473	a8ZHVl	ad	CD62L- CD86+ myeloid Dendritic Cell %Dendritic Cell	Inverse variance weighted	6	0.00987822	0.0161378	0.540461	-0.0217519	0.0415083	1.00993	0.978483	1.04238
ebi-a-GCST90001474	nccBnQ	ad	Plasmacytoid Dendritic Cell %Dendritic Cell	Inverse variance weighted	2	-0.127553	0.0414435	0.00208563	-0.208782	-0.0463238	0.880247	0.811572	0.954733
ebi-a-GCST90001475	bdWjjD	ad	HLA DR++ monocyte %monocyte	Inverse variance weighted	3	-0.0701569	0.0242105	0.00375806	-0.11761	-0.0227043	0.932248	0.889043	0.977552
ebi-a-GCST90001477	QfCoEi	ad	HLA DR++ monocyte Absolute Count	Inverse variance weighted	2	-0.0126294	0.0630603	0.841266	-0.136228	0.110969	0.98745	0.872644	1.11736
ebi-a-GCST90001478	BywUH6	ad	CD4 regulatory T cell %CD4+ T cell	Inverse variance weighted	2	-0.00711218	0.0433106	0.869563	-0.0920009	0.0777765	0.992913	0.912104	1.08088
ebi-a-GCST90001480	g7H8xO	ad	Resting CD4 regulatory T cell Absolute Count	Inverse variance weighted	6	0.0253882	0.00969383	0.00881857	0.00638832	0.0443881	1.02571	1.00641	1.04539
ebi-a-GCST90001481	cgQ95v	ad	Resting CD4 regulatory T cell %CD4 regulatory T cell	Inverse variance weighted	15	0.0178731	0.005146	0.000514	0.00778694	0.0279592	1.01803	1.00782	1.02835
ebi-a-GCST90001482	zi7rhx	ad	Resting CD4 regulatory T cell %CD4+ T cell	Inverse variance weighted	10	0.0215651	0.00629233	0.00061	0.00923216	0.0338981	1.0218	1.00927	1.03448
ebi-a-GCST90001483	mLpXYj	ad	CD39+ resting CD4 regulatory T cell Absolute Count	Inverse variance weighted	18	0.0158841	0.00752216	0.0347178	0.00114062	0.0306275	1.01601	1.00114	1.0311
ebi-a-GCST90001484	C4f0zM	ad	CD39+ resting CD4 regulatory T cell %resting CD4 regulatory T cell	Inverse variance weighted	15	0.0150767	0.00768724	0.0498487	9.69e-06	0.0301437	1.01519	1.00001	1.0306
ebi-a-GCST90001485	Jm1uoi	ad	CD39+ resting CD4 regulatory T cell %CD4 regulatory T cell	Inverse variance weighted	22	0.0172134	0.00602807	0.00429633	0.0053984	0.0290284	1.01736	1.00541	1.02945
ebi-a-GCST90001486	uOTe3c	ad	Activated CD4 regulatory T cell Absolute Count	Inverse variance weighted	3	-0.0339921	0.0147951	0.021589	-0.0629905	-0.00499368	0.966579	0.938952	0.995019
ebi-a-GCST90001487	eAPiZv	ad	Activated CD4 regulatory T cell %CD4 regulatory T cell	Inverse variance weighted	5	-0.0119769	0.010758	0.265576	-0.0330625	0.00910867	0.988094	0.967478	1.00915
ebi-a-GCST90001489	CvSRlD	ad	CD39+ activated CD4 regulatory T cell Absolute Count	Inverse variance weighted	13	0.0140648	0.00900655	0.118379	-0.00358808	0.0317176	1.01416	0.996418	1.03223
ebi-a-GCST90001491	WqLxa5	ad	CD39+ activated CD4 regulatory T cell %CD4 regulatory T cell	Inverse variance weighted	12	0.0122399	0.00860693	0.154998	-0.0046297	0.0291095	1.01232	0.995381	1.02954
ebi-a-GCST90001492	H7Dc2t	ad	Secreting CD4 regulatory T cell Absolute Count	Inverse variance weighted	6	-0.0309884	0.0083319	0.0002	-0.0473189	-0.0146578	0.969487	0.953783	0.985449
ebi-a-GCST90001493	1UQy5C	ad	Secreting CD4 regulatory T cell %CD4 regulatory T cell	Inverse variance weighted	11	-0.0226507	0.00570625	7.2e-05	-0.0338349	-0.0114664	0.977604	0.966731	0.988599
ebi-a-GCST90001494	FXLdfU	ad	Secreting CD4 regulatory T cell %CD4+ T cell	Inverse variance weighted	10	-0.0178589	0.00632532	0.00475178	-0.0302565	-0.00546126	0.9823	0.970197	0.994554
ebi-a-GCST90001495	ZsQiEt	ad	CD39+ secreting CD4 regulatory T cell Absolute Count	Inverse variance weighted	16	0.01367	0.007638	0.0734956	-0.00130044	0.0286405	1.01376	0.9987	1.02905
ebi-a-GCST90001496	5zt7zw	ad	CD39+ secreting CD4 regulatory T cell %secreting CD4 regulatory T cell	Inverse variance weighted	14	-0.00213335	0.01314	0.871026	-0.0278877	0.023621	0.997869	0.972498	1.0239
ebi-a-GCST90001497	PBUuH6	ad	CD39+ secreting CD4 regulatory T cell %CD4 regulatory T cell	Inverse variance weighted	13	0.00218098	0.013072	0.867493	-0.0234402	0.0278021	1.00218	0.976832	1.02819
ebi-a-GCST90001499	c4hqeu	ad	Activated & resting CD4 regulatory T cell %CD4 regulatory T cell	Inverse variance weighted	11	0.0223321	0.00562563	7.2e-05	0.0113058	0.0333583	1.02258	1.01137	1.03392
ebi-a-GCST90001500	lmswJj	ad	Activated & resting CD4 regulatory T cell %CD4+ T cell	Inverse variance weighted	6	0.0240414	0.00934231	0.0100708	0.00573048	0.0423523	1.02433	1.00575	1.04326
ebi-a-GCST90001501	B8bF2c	ad	Activated & secreting CD4 regulatory T cell Absolute Count	Inverse variance weighted	6	-0.0280538	0.00820709	0.00063	-0.0441397	-0.0119679	0.972336	0.95682	0.988103
ebi-a-GCST90001502	RSG0Vb	ad	Activated & secreting CD4 regulatory T cell %CD4 regulatory T cell	Inverse variance weighted	15	-0.0208829	0.00536698	9.98e-05	-0.0314021	-0.0103636	0.979334	0.969086	0.98969
ebi-a-GCST90001503	ZIMebt	ad	Activated & secreting CD4 regulatory T cell %CD4+ T cell	Inverse variance weighted	11	-0.0161874	0.00656011	0.0136044	-0.0290452	-0.00332953	0.983943	0.971373	0.996676
ebi-a-GCST90001507	o5PdKm	ad	CD25++ CD45RA+ CD4 not regulatory T cell Absolute Count	Inverse variance weighted	6	0.0204412	0.00792675	0.00991534	0.00490482	0.0359777	1.02065	1.00492	1.03663
ebi-a-GCST90001508	4yUDad	ad	CD25++ CD45RA+ CD4 not regulatory T cell %CD4+ T cell	Inverse variance weighted	9	0.0208149	0.00677479	0.00212343	0.00753629	0.0340935	1.02103	1.00756	1.03468
ebi-a-GCST90001509	vamPqZ	ad	CD25++ CD45RA+ CD4 not regulatory T cell %T cell	Inverse variance weighted	8	0.021344	0.00736736	0.00376631	0.00690394	0.035784	1.02157	1.00693	1.03643
ebi-a-GCST90001510	YUP1j0	ad	CD25++ CD45RA- CD4 not regulatory T cell Absolute Count	Inverse variance weighted	4	-0.0346578	0.0118516	0.00345211	-0.0578869	-0.0114287	0.965936	0.943757	0.988636
ebi-a-GCST90001511	pdwNGn	ad	CD25++ CD45RA- CD4 not regulatory T cell %CD4+ T cell	Inverse variance weighted	6	-0.0267274	0.0086321	0.00195966	-0.0436463	-0.00980847	0.973627	0.957292	0.990239
ebi-a-GCST90001512	37xpFN	ad	CD25++ CD45RA- CD4 not regulatory T cell %T cell	Inverse variance weighted	5	-0.0365431	0.0100423	0.000274	-0.056226	-0.0168603	0.964116	0.945325	0.983281
ebi-a-GCST90001514	60Q6a7	ad	Hematopoietic Stem Cell Absolute Count	Inverse variance weighted	3	0.0158019	0.0137004	0.248748	-0.0110508	0.0426546	1.01593	0.98901	1.04358
ebi-a-GCST90001515	FF8IeS	ad	Immature Myeloid-Derived Suppressor Cells Absolute Count	Inverse variance weighted	2	0.0795114	0.0311934	0.0108036	0.0183725	0.14065	1.08276	1.01854	1.15102
ebi-a-GCST90001516	dV4Dim	ad	Immature Myeloid-Derived Suppressor Cells %CD33dim HLA DR- CD66b-	Inverse variance weighted	2	0.062926	0.0788619	0.424913	-0.0916433	0.217495	1.06495	0.912431	1.24296
ebi-a-GCST90001520	f7PAQ9	ad	CD33+ HLA DR+ CD14dim Absolute Count	Inverse variance weighted	2	0.0735032	0.0532027	0.167104	-0.0307741	0.17778	1.07627	0.969695	1.19456
ebi-a-GCST90001524	KHkzCm	ad	Granulocytic Myeloid-Derived Suppressor Cells Absolute Count	Inverse variance weighted	2	0.117598	0.0301958	9.84e-05	0.0584138	0.176781	1.12479	1.06015	1.19337
ebi-a-GCST90001526	p85EKM	ad	CD33dim HLA DR+ CD11b+ %CD33dim HLA DR+	Inverse variance weighted	2	0.0243991	0.0132492	0.065541	-0.00156937	0.0503676	1.0247	0.998432	1.05166
ebi-a-GCST90001527	c5oxIc	ad	CD33dim HLA DR+ CD11b- Absolute Count	Inverse variance weighted	2	9.46e-05	0.0241428	0.996873	-0.0472253	0.0474145	1.00009	0.953872	1.04856
ebi-a-GCST90001528	A6DD9r	ad	CD33dim HLA DR+ CD11b- %CD33dim HLA DR+	Inverse variance weighted	2	-0.024372	0.0132501	0.0658597	-0.0503422	0.00159827	0.975923	0.950904	1.0016
ebi-a-GCST90001530	QrMnyU	ad	Monocytic Myeloid-Derived Suppressor Cells Absolute Count	Inverse variance weighted	4	0.0369775	0.0266537	0.165342	-0.0152639	0.0892188	1.03767	0.984852	1.09332
ebi-a-GCST90001531	ElzL7R	ad	CD33dim HLA DR- Absolute Count	Inverse variance weighted	2	0.002009	0.00970008	0.835922	-0.0170032	0.0210212	1.00201	0.983141	1.02124
ebi-a-GCST90001532	WwjAjA	ad	Basophil Absolute Count	Inverse variance weighted	3	0.0158821	0.0192637	0.40968	-0.0218748	0.053639	1.01601	0.978363	1.0551
ebi-a-GCST90001533	tpuwaW	ad	Basophil %CD33dim HLA DR- CD66b-	Inverse variance weighted	3	0.050343	0.0202572	0.0129481	0.010639	0.0900471	1.05163	1.0107	1.09423
ebi-a-GCST90001534	RIOuU5	ad	CD45RA- CD4+ T cell Absolute Count	Inverse variance weighted	2	-0.033192	0.0236158	0.159872	-0.079479	0.0130949	0.967353	0.923597	1.01318
ebi-a-GCST90001535	mC0NXX	ad	CD45RA- CD4+ T cell %CD4+ T cell	Inverse variance weighted	6	-0.0283194	0.010314	0.00603767	-0.0485349	-0.008104	0.972078	0.952624	0.991929
ebi-a-GCST90001536	OD6kJq	ad	CD45RA- CD4+ T cell %T cell	Inverse variance weighted	4	-0.0284613	0.0133855	0.0334806	-0.0546969	-0.00222564	0.97194	0.946772	0.997777
ebi-a-GCST90001540	JtHLvY	ad	Naive CD4+ T cell Absolute Count	Inverse variance weighted	2	-0.00209105	0.0845262	0.980264	-0.167762	0.16358	0.997911	0.845555	1.17772
ebi-a-GCST90001541	dGg8BS	ad	Naive CD4+ T cell %CD4+ T cell	Inverse variance weighted	2	0.0431123	0.0240437	0.0729607	-0.00401346	0.090238	1.04406	0.995995	1.09443
ebi-a-GCST90001543	vLITLE	ad	Effector Memory CD4+ T cell %CD4+ T cell	Inverse variance weighted	2	-0.0257956	0.0443145	0.560497	-0.112652	0.0610608	0.974534	0.893461	1.06296
ebi-a-GCST90001544	4XYWiY	ad	Effector Memory CD4+ T cell %T cell	Inverse variance weighted	4	-0.00834323	0.0229331	0.716002	-0.0532921	0.0366056	0.991691	0.948103	1.03728
ebi-a-GCST90001546	vsmitp	ad	Terminally Differentiated CD4+ T cell %CD4+ T cell	Inverse variance weighted	3	0.0632024	0.0254251	0.0129249	0.0133693	0.113036	1.06524	1.01346	1.11967
ebi-a-GCST90001547	2TwTQI	ad	Terminally Differentiated CD4+ T cell %T cell	Inverse variance weighted	4	0.030865	0.0312548	0.323385	-0.0303945	0.0921245	1.03135	0.970063	1.0965
ebi-a-GCST90001551	313Wa5	ad	Naive CD8+ T cell Absolute Count	Inverse variance weighted	2	0.0177708	0.0481277	0.711947	-0.0765596	0.112101	1.01793	0.926298	1.11863
ebi-a-GCST90001553	CBKYqT	ad	Naive CD8+ T cell %T cell	Inverse variance weighted	2	-0.00142636	0.00518185	0.783116	-0.0115828	0.00873006	0.998575	0.988484	1.00877
ebi-a-GCST90001554	qfr054	ad	Effector Memory CD8+ T cell Absolute Count	Inverse variance weighted	2	-0.00141679	0.018339	0.93842	-0.0373613	0.0345277	0.998584	0.963328	1.03513
ebi-a-GCST90001555	LzwxTZ	ad	Effector Memory CD8+ T cell %CD8+ T cell	Inverse variance weighted	6	-0.0222353	0.0090945	0.0144884	-0.0400605	-0.0044101	0.97801	0.960731	0.9956
ebi-a-GCST90001556	9keMob	ad	Effector Memory CD8+ T cell %T cell	Inverse variance weighted	2	-0.0135791	0.0180957	0.45301	-0.0490467	0.0218884	0.986513	0.952137	1.02213
ebi-a-GCST90001558	xuadsh	ad	Terminally Differentiated CD8+ T cell %CD8+ T cell	Inverse variance weighted	5	0.0274869	0.0164745	0.0952255	-0.00480305	0.0597768	1.02787	0.995208	1.0616
ebi-a-GCST90001559	SB6mDE	ad	Terminally Differentiated CD8+ T cell %T cell	Inverse variance weighted	2	0.0418766	0.022124	0.0583829	-0.00148648	0.0852397	1.04277	0.998515	1.08898
ebi-a-GCST90001560	usThBK	ad	CD45RA+ CD8+ T cell Absolute Count	Inverse variance weighted	3	-0.0219091	0.0713198	0.758695	-0.161696	0.117878	0.978329	0.8507	1.12511
ebi-a-GCST90001561	Z0G3iE	ad	CD45RA+ CD8+ T cell %CD8+ T cell	Inverse variance weighted	7	0.0172065	0.0065615	0.00873269	0.00434598	0.0300671	1.01736	1.00436	1.03052
ebi-a-GCST90001562	fGgyZ4	ad	CD45RA+ CD8+ T cell %T cell	Inverse variance weighted	4	0.0317583	0.0166353	0.0562504	-0.000847	0.0643636	1.03227	0.999153	1.06648
ebi-a-GCST90001569	TdECnO	ad	Effector Memory CD4-CD8- T cell Absolute Count	Inverse variance weighted	4	-0.0330839	0.0332272	0.319402	-0.0982093	0.0320415	0.967457	0.906459	1.03256
ebi-a-GCST90001570	sP6CaK	ad	Effector Memory CD4-CD8- T cell %CD4-CD8- T cell	Inverse variance weighted	4	-0.0161176	0.0114911	0.16073	-0.0386402	0.00640493	0.984012	0.962097	1.00643
ebi-a-GCST90001571	R9ufP9	ad	Effector Memory CD4-CD8- T cell %T cell	Inverse variance weighted	4	-0.0537389	0.0329013	0.102398	-0.118225	0.0107476	0.94768	0.888496	1.01081
ebi-a-GCST90001573	puZeuK	ad	Terminally Differentiated CD4-CD8- T cell %CD4-CD8- T cell	Inverse variance weighted	3	0.0177895	0.01229	0.147761	-0.00629879	0.0418778	1.01795	0.993721	1.04277
ebi-a-GCST90001574	rjPTCU	ad	Terminally Differentiated CD4-CD8- T cell %T cell	Inverse variance weighted	4	-0.00680494	0.0291804	0.815604	-0.0639986	0.0503887	0.993218	0.938006	1.05168
ebi-a-GCST90001580	xyiNvj	ad	CD14+ CD16+ monocyte Absolute Count	Inverse variance weighted	2	-0.0308509	0.031466	0.326863	-0.0925242	0.0308224	0.96962	0.911627	1.0313
ebi-a-GCST90001581	JaYMBL	ad	CD14- CD16- Absolute Count	Inverse variance weighted	3	-0.0124471	0.0507502	0.806253	-0.111917	0.0870232	0.98763	0.894118	1.09092
ebi-a-GCST90001582	zjbOyn	ad	CD14+ CD16- monocyte Absolute Count	Inverse variance weighted	3	-0.0460178	0.0449495	0.305945	-0.134119	0.0420832	0.955025	0.874486	1.04298
ebi-a-GCST90001585	f0nA19	ad	CD14+ CD16+ monocyte %monocyte	Inverse variance weighted	2	-0.0292423	0.027988	0.296109	-0.0840988	0.0256143	0.971181	0.91934	1.02595
ebi-a-GCST90001588	GajeGJ	ad	T/B cell	Inverse variance weighted	2	-0.101183	0.183051	0.580431	-0.459963	0.257598	0.903768	0.631307	1.29382
ebi-a-GCST90001592	3MO8rE	ad	CD8+ T cell Absolute Count	Inverse variance weighted	3	-0.0157243	0.0565968	0.781142	-0.126654	0.0952054	0.984399	0.881038	1.09988
ebi-a-GCST90001594	sTRm3I	ad	CD4+CD8+ T cell Absolute Count	Inverse variance weighted	2	0.0373059	0.0264768	0.158835	-0.0145887	0.0892005	1.03801	0.985517	1.0933
ebi-a-GCST90001596	wKWIUN	ad	CD8dim T cell Absolute Count	Inverse variance weighted	4	0.00477466	0.0336223	0.887073	-0.061125	0.0706743	1.00479	0.940706	1.07323
ebi-a-GCST90001597	Q4qTY6	ad	CD8dim T cell %T cell	Inverse variance weighted	3	-0.00258617	0.0354703	0.941877	-0.0721079	0.0669355	0.997417	0.930431	1.06923
ebi-a-GCST90001598	z94DRy	ad	CD4-CD8- T cell Absolute Count	Inverse variance weighted	2	-0.0321408	0.0532118	0.545833	-0.136436	0.0721544	0.96837	0.872462	1.07482
ebi-a-GCST90001599	7sy6SK	ad	CD4-CD8- T cell %T cell	Inverse variance weighted	3	-0.035003	0.04376	0.423777	-0.120773	0.0507666	0.965603	0.886235	1.05208
ebi-a-GCST90001603	O3A0FD	ad	T cell Absolute Count	Inverse variance weighted	2	-0.0952124	0.0361362	0.00841824	-0.166039	-0.0243854	0.90918	0.847013	0.97591
ebi-a-GCST90001604	sTLFJ3	ad	T cell %lymphocyte	Inverse variance weighted	2	0.0281483	0.0309214	0.362655	-0.0324576	0.0887542	1.02855	0.968063	1.09281
ebi-a-GCST90001607	l0AFsY	ad	CD8+ T cell %leukocyte	Inverse variance weighted	2	-0.0508627	0.104753	0.627287	-0.256179	0.154453	0.950409	0.774004	1.16702
ebi-a-GCST90001612	fRFj0i	ad	CD8dim T cell %leukocyte	Inverse variance weighted	3	-0.00203312	0.0374873	0.956748	-0.0755083	0.071442	0.997969	0.927272	1.07406
ebi-a-GCST90001613	nOIUPn	ad	CD4-CD8- T cell %leukocyte	Inverse variance weighted	4	-0.0187595	0.0379025	0.620642	-0.0930484	0.0555294	0.981415	0.911149	1.0571
ebi-a-GCST90001614	RFS3VV	ad	CD8+ and CD8dim T cell %leukocyte	Inverse variance weighted	3	-0.0619616	0.0406531	0.127471	-0.141642	0.0177186	0.939919	0.867932	1.01788
ebi-a-GCST90001618	yLtqVh	ad	HLA DR+ T cell Absolute Count	Inverse variance weighted	4	-0.0165859	0.0293868	0.572481	-0.074184	0.0410121	0.983551	0.928501	1.04186
ebi-a-GCST90001619	OT2s1U	ad	HLA DR+ T cell%T cell	Inverse variance weighted	3	-0.0273736	0.0185356	0.139726	-0.0637033	0.00895617	0.972998	0.938283	1.009
ebi-a-GCST90001620	XPhmnP	ad	HLA DR+ T cell%lymphocyte	Inverse variance weighted	4	-0.0256542	0.0178688	0.151087	-0.060677	0.00936856	0.974672	0.941127	1.00941
ebi-a-GCST90001621	SkfGaX	ad	Natural Killer T Absolute Count	Inverse variance weighted	6	0.00530225	0.0383759	0.890109	-0.0699144	0.0805189	1.00532	0.932474	1.08385
ebi-a-GCST90001622	taPnxW	ad	Natural Killer T %T cell	Inverse variance weighted	7	0.0265296	0.0241788	0.272543	-0.0208609	0.0739201	1.02688	0.979355	1.07672
ebi-a-GCST90001623	TyWwZb	ad	Natural Killer T %lymphocyte	Inverse variance weighted	8	0.0357947	0.020368	0.0788504	-0.00412665	0.0757161	1.03644	0.995882	1.07866
ebi-a-GCST90001624	jtnWga	ad	HLA DR+ CD4+ T cell Absolute Count	Inverse variance weighted	2	-0.0405777	0.0278619	0.145286	-0.0951869	0.0140316	0.960235	0.909203	1.01413
ebi-a-GCST90001626	npxM5Y	ad	HLA DR+ CD4+ T cell %lymphocyte	Inverse variance weighted	2	-0.0401827	0.0273269	0.141442	-0.0937435	0.0133781	0.960614	0.910516	1.01347
ebi-a-GCST90001627	FvjD0X	ad	HLA DR+ CD8+ T cell Absolute Count	Inverse variance weighted	3	-0.0196728	0.0383923	0.60836	-0.0949218	0.0555761	0.980519	0.909444	1.05715
ebi-a-GCST90001628	CZnCbS	ad	HLA DR+ CD8+ T cell %T cell	Inverse variance weighted	3	-0.022075	0.0363195	0.54332	-0.0932613	0.0491112	0.978167	0.910955	1.05034
ebi-a-GCST90001629	891toH	ad	HLA DR+ CD8+ T cell %lymphocyte	Inverse variance weighted	2	-0.025441	0.0528123	0.630001	-0.128953	0.0780711	0.97488	0.879015	1.0812
ebi-a-GCST90001630	CjPSdI	ad	CD8+ Natural Killer T Absolute Count	Inverse variance weighted	2	-0.0591781	0.119624	0.620812	-0.293642	0.175286	0.942539	0.745543	1.19159
ebi-a-GCST90001633	WMki1I	ad	CD8dim Natural Killer T Absolute Count	Inverse variance weighted	7	0.00886765	0.0209404	0.671952	-0.0321756	0.0499109	1.00891	0.968337	1.05118
ebi-a-GCST90001634	c5ihPF	ad	CD8dim Natural Killer T %T cell	Inverse variance weighted	7	0.00861522	0.0196391	0.660896	-0.0298774	0.0471079	1.00865	0.970564	1.04824
ebi-a-GCST90001635	Qz4jAp	ad	CD8dim Natural Killer T %lymphocyte	Inverse variance weighted	8	0.00877741	0.0189711	0.6436	-0.028406	0.0459608	1.00882	0.971994	1.04703
ebi-a-GCST90001637	SkjLbo	ad	CD4-CD8- Natural Killer T %T cell	Inverse variance weighted	8	0.00404613	0.0227861	0.859061	-0.0406147	0.0487069	1.00405	0.960199	1.04991
ebi-a-GCST90001638	iZokvF	ad	CD4-CD8- Natural Killer T %lymphocyte	Inverse variance weighted	8	-0.00454194	0.0188462	0.809555	-0.0414804	0.0323966	0.995468	0.959368	1.03293
ebi-a-GCST90001643	sX3IRp	ad	B cell %CD3- lymphocyte	Inverse variance weighted	3	-0.00136098	0.0183271	0.940803	-0.037282	0.03456	0.99864	0.963404	1.03516
ebi-a-GCST90001644	t8UyqM	ad	B cell %lymphocyte	Inverse variance weighted	2	0.0657294	0.162023	0.684977	-0.251835	0.383294	1.06794	0.777373	1.46711
ebi-a-GCST90001645	i9oIQ2	ad	Natural Killer Absolute Count	Inverse variance weighted	3	-0.0350726	0.03069	0.253122	-0.095225	0.0250799	0.965535	0.909168	1.0254
ebi-a-GCST90001646	UwptDb	ad	Natural Killer %CD3- lymphocyte	Inverse variance weighted	5	-0.00537391	0.0156908	0.731985	-0.036128	0.0253802	0.994641	0.964517	1.0257
ebi-a-GCST90001647	zL0NOo	ad	Natural Killer %lymphocyte	Inverse variance weighted	3	-0.0282213	0.0259921	0.277582	-0.0791658	0.0227231	0.972173	0.923887	1.02298
ebi-a-GCST90001648	9hUFdp	ad	HLA DR+ Natural Killer Absolute Count	Inverse variance weighted	3	-0.0240299	0.0214189	0.261906	-0.066011	0.0179513	0.976257	0.936121	1.01811
ebi-a-GCST90001649	yQSMZ4	ad	HLA DR+ Natural Killer %Natural Killer	Inverse variance weighted	5	-0.0264424	0.0148842	0.0756437	-0.0556154	0.00273063	0.973904	0.945903	1.00273
ebi-a-GCST90001650	tyeslR	ad	HLA DR+ Natural Killer %CD3- lymphocyte	Inverse variance weighted	4	-0.029382	0.0164638	0.0743183	-0.061651	0.00288694	0.971045	0.940211	1.00289
ebi-a-GCST90001654	8aAlun	ad	CD28- CD4-CD8- T cell Absolute Count	Inverse variance weighted	2	-0.0177534	0.050755	0.726499	-0.117233	0.0817264	0.982403	0.889378	1.08516
ebi-a-GCST90001658	Krwzz5	ad	CD39+ CD4+ T cell %T cell	Inverse variance weighted	17	-0.0159891	0.0115092	0.164758	-0.0385472	0.00656895	0.984138	0.962186	1.00659
ebi-a-GCST90001659	BKpbIM	ad	CD39+ CD4+ T cell %CD4+ T cell	Inverse variance weighted	15	-0.0129613	0.0119003	0.276086	-0.036286	0.0103634	0.987122	0.964364	1.01042
ebi-a-GCST90001660	pP5Dcn	ad	CD39+ CD4+ T cell Absolute Count	Inverse variance weighted	17	-0.0123724	0.0143043	0.387069	-0.0404089	0.015664	0.987704	0.960397	1.01579
ebi-a-GCST90001661	ZNm3YD	ad	CD28- CD8dim T cell %T cell	Inverse variance weighted	3	0.0742819	0.0435227	0.0878704	-0.0110225	0.159586	1.07711	0.989038	1.17303
ebi-a-GCST90001663	Dm2ud0	ad	CD28- CD8dim T cell Absolute Count	Inverse variance weighted	2	0.0562662	0.0700295	0.421706	-0.0809916	0.193524	1.05788	0.922201	1.21352
ebi-a-GCST90001664	yhX3Ox	ad	CD28+ CD45RA+ CD8dim T cell %T cell	Inverse variance weighted	8	0.0193383	0.0132259	0.143699	-0.00658449	0.0452611	1.01953	0.993437	1.0463
ebi-a-GCST90001665	wSlFn2	ad	CD28+ CD45RA+ CD8dim T cell %CD8dim T cell	Inverse variance weighted	7	0.0156794	0.00912973	0.0859066	-0.0022149	0.0335737	1.0158	0.997788	1.03414
ebi-a-GCST90001666	H2AkZd	ad	CD28+ CD45RA+ CD8dim T cell Absolute Count	Inverse variance weighted	8	0.00433044	0.00647665	0.503736	-0.0083638	0.0170247	1.00434	0.991671	1.01717
ebi-a-GCST90001667	EslJm1	ad	CD28+ CD45RA- CD8dim T cell %T cell	Inverse variance weighted	4	-0.0205677	0.00872231	0.0183708	-0.0376634	-0.00347199	0.979642	0.963037	0.996534
ebi-a-GCST90001668	StXSda	ad	CD28+ CD45RA- CD8dim T cell %CD8dim T cell	Inverse variance weighted	3	-0.0186556	0.0105385	0.0766899	-0.0393111	0.00199997	0.981517	0.961452	1.002
ebi-a-GCST90001669	Q0WfNi	ad	CD28+ CD45RA- CD8dim T cell Absolute Count	Inverse variance weighted	4	-0.0240476	0.0089915	0.00748446	-0.041671	-0.00642428	0.976239	0.959185	0.993596
ebi-a-GCST90001670	UavKZX	ad	CD39+ CD8+ T cell %T cell	Inverse variance weighted	20	-0.0212352	0.0124373	0.0877518	-0.0456123	0.00314194	0.978989	0.955412	1.00315
ebi-a-GCST90001671	ExZWJp	ad	CD39+ CD8+ T cell %CD8+ T cell	Inverse variance weighted	16	-0.02433	0.01412	0.0848721	-0.0520051	0.00334515	0.975964	0.949324	1.00335
ebi-a-GCST90001672	lHSzKD	ad	CD39+ CD8+ T cell Absolute Count	Inverse variance weighted	21	-0.0172814	0.0120942	0.153031	-0.040986	0.00642312	0.982867	0.959843	1.00644
ebi-a-GCST90001679	ikho7y	ad	CD25++ CD8+ T cell %T cell	Inverse variance weighted	2	-0.0161341	0.0475455	0.734354	-0.109323	0.0770551	0.983995	0.896441	1.0801
ebi-a-GCST90001681	EvJJ4d	ad	CD25++ CD8+ T cell Absolute Count	Inverse variance weighted	3	-0.0129392	0.0324347	0.689945	-0.0765111	0.0506328	0.987144	0.926343	1.05194
ebi-a-GCST90001684	S8JMnz	ad	CD127- CD8+ T cell Absolute Count	Inverse variance weighted	2	-0.049102	0.0964878	0.610827	-0.238218	0.140014	0.952084	0.788031	1.15029
ebi-a-GCST90001686	KoHNTO	ad	CD28- CD8+ T cell %CD8+ T cell	Inverse variance weighted	4	0.0612923	0.0348403	0.0785377	-0.00699474	0.129579	1.06321	0.99303	1.13835
ebi-a-GCST90001687	IGqHSv	ad	CD28- CD8+ T cell Absolute Count	Inverse variance weighted	3	-0.0243436	0.0730992	0.739118	-0.167618	0.118931	0.97595	0.845677	1.12629
ebi-a-GCST90001688	MFiGXg	ad	CD28+ CD45RA+ CD8+ T cell %T cell	Inverse variance weighted	33	0.00227172	0.00129483	0.0793532	-0.000266	0.0048096	1.00227	0.999734	1.00482
ebi-a-GCST90001690	TRPvJu	ad	CD28+ CD45RA+ CD8+ T cell Absolute Count	Inverse variance weighted	2	-0.0323427	0.127161	0.799229	-0.281578	0.216893	0.968175	0.754592	1.24221
ebi-a-GCST90001691	op7QIN	ad	CD28+ CD45RA- CD8+ T cell %T cell	Inverse variance weighted	6	-0.0208124	0.00786413	0.00813288	-0.0362261	-0.00539875	0.979403	0.964422	0.994616
ebi-a-GCST90001692	L2jPqP	ad	CD28+ CD45RA- CD8+ T cell %CD8+ T cell	Inverse variance weighted	6	-0.0219629	0.00836658	0.00866313	-0.0383614	-0.00556436	0.978277	0.962365	0.994451
ebi-a-GCST90001693	OH9M7q	ad	CD28+ CD45RA- CD8+ T cell Absolute Count	Inverse variance weighted	4	-0.0264137	0.0113817	0.0203022	-0.0487218	-0.00410555	0.973932	0.952446	0.995903
ebi-a-GCST90001694	Ri4C9R	ad	CD28- CD4-CD8- T cell %T cell	Inverse variance weighted	3	-0.0387601	0.0426021	0.362919	-0.12226	0.04474	0.961981	0.884918	1.04576
ebi-a-GCST90001695	Ghux4b	ad	CD45RA- CD28- CD8+ T cell Absolute Count	Inverse variance weighted	131	8.87e-06	6.35e-06	0.162372	-3.57e-06	2.13e-05	1.00001	0.999996	1.00002
ebi-a-GCST90001696	aau4wS	ad	CD45RA- CD28- CD8+ T cell %CD8+ T cell	Inverse variance weighted	11	0.000598	0.000431	0.16486	-0.000246	0.00144277	1.0006	0.999754	1.00144
ebi-a-GCST90001697	wvoDUT	ad	CD45RA- CD28- CD8+ T cell %T cell	Inverse variance weighted	36	0.000805	0.000258	0.00178008	0.0003	0.0013106	1.00081	1.0003	1.00131
ebi-a-GCST90001698	NK6OFS	ad	CD45RA+ CD28- CD8+ T cell Absolute Count	Inverse variance weighted	540	5.58e-06	2.77e-06	0.0438925	1.53e-07	1.1e-05	1.00001	1	1.00001
ebi-a-GCST90001700	RLghpz	ad	CD45RA+ CD28- CD8+ T cell %T cell	Inverse variance weighted	69	0.000335	0.000129	0.00954027	8.16e-05	0.000587	1.00033	1.00008	1.00059
ebi-a-GCST90001701	Bui6zd	ad	BAFF-R on CD20- CD38- B cell	Inverse variance weighted	2	0.0217166	0.0545284	0.690437	-0.0851591	0.128592	1.02195	0.918366	1.13723
ebi-a-GCST90001702	UyR7CG	ad	BAFF-R on CD24+ CD27+ B cell	Inverse variance weighted	22	-0.00949758	0.00888593	0.285145	-0.026914	0.00791885	0.990547	0.973445	1.00795
ebi-a-GCST90001703	sTEWnR	ad	BAFF-R on IgD+ CD24+ B cell	Inverse variance weighted	18	-0.00882279	0.00878037	0.314978	-0.0260323	0.00838674	0.991216	0.974304	1.00842
ebi-a-GCST90001704	g2OkhP	ad	BAFF-R on IgD+ CD24- B cell	Inverse variance weighted	25	-0.00621228	0.00736888	0.399204	-0.0206553	0.00823071	0.993807	0.979557	1.00826
ebi-a-GCST90001705	MGSGAo	ad	BAFF-R on IgD+ CD38- B cell	Inverse variance weighted	19	0.000103	0.00923891	0.991092	-0.0180051	0.0182114	1.0001	0.982156	1.01838
ebi-a-GCST90001706	Vumo5g	ad	BAFF-R on IgD+ CD38- naive B cell	Inverse variance weighted	12	-0.00650761	0.0133836	0.626799	-0.0327395	0.0197243	0.993514	0.967791	1.01992
ebi-a-GCST90001707	IDCSt9	ad	BAFF-R on IgD+ CD38- unswitched memory B cell	Inverse variance weighted	14	-0.00678067	0.00983086	0.490362	-0.0260492	0.0124878	0.993242	0.974287	1.01257
ebi-a-GCST90001708	OSYpbN	ad	BAFF-R on IgD+ CD38+ B cell	Inverse variance weighted	22	-0.00516052	0.00784312	0.510559	-0.020533	0.010212	0.994853	0.979676	1.01026
ebi-a-GCST90001709	4TXFZz	ad	BAFF-R on IgD+ CD38dim B cell	Inverse variance weighted	26	-0.00733943	0.00739637	0.321051	-0.0218363	0.00715746	0.992687	0.9784	1.00718
ebi-a-GCST90001710	GZ1QSI	ad	BAFF-R on IgD- CD24- B cell	Inverse variance weighted	21	-0.00884695	0.00868345	0.308284	-0.0258665	0.00817262	0.991192	0.974465	1.00821
ebi-a-GCST90001711	rO181c	ad	BAFF-R on IgD- CD27- B cell	Inverse variance weighted	22	-0.0113311	0.00886705	0.20129	-0.0287105	0.00604836	0.988733	0.971698	1.00607
ebi-a-GCST90001712	pTTNJ3	ad	BAFF-R on IgD- CD38- B cell	Inverse variance weighted	23	-0.00769317	0.00971437	0.428397	-0.0267333	0.011347	0.992336	0.973621	1.01141
ebi-a-GCST90001713	qvPMAY	ad	BAFF-R on IgD- CD38+ B cell	Inverse variance weighted	3	-0.0180688	0.0240971	0.453355	-0.0652991	0.0291615	0.982093	0.936787	1.02959
ebi-a-GCST90001715	Rgbbut	ad	BAFF-R on memory B cell	Inverse variance weighted	19	-0.00733655	0.00875129	0.40184	-0.0244891	0.00981599	0.99269	0.975808	1.00986
ebi-a-GCST90001716	WmlwfO	ad	BAFF-R on naive-mature B cell	Inverse variance weighted	25	-0.00665782	0.0075389	0.377167	-0.0214341	0.00811843	0.993364	0.978794	1.00815
ebi-a-GCST90001717	oG6epC	ad	BAFF-R on unswitched memory B cell	Inverse variance weighted	19	-0.00760312	0.0088244	0.388907	-0.024899	0.00969271	0.992426	0.975408	1.00974
ebi-a-GCST90001718	ArmzsW	ad	BAFF-R on switched memory B cell	Inverse variance weighted	23	-0.00966707	0.00899499	0.282501	-0.0272973	0.00796311	0.99038	0.973072	1.00799
ebi-a-GCST90001719	hizsJo	ad	BAFF-R on IgD+ B cell	Inverse variance weighted	25	-0.00612802	0.00738893	0.406906	-0.0206103	0.00835428	0.993891	0.979601	1.00839
ebi-a-GCST90001720	UkK0i7	ad	BAFF-R on transitional B cell	Inverse variance weighted	17	-0.00533232	0.00928357	0.565709	-0.0235281	0.0128635	0.994682	0.976747	1.01295
ebi-a-GCST90001723	QZbzAk	ad	CD19 on CD24+ CD27+ B cell	Inverse variance weighted	2	0.0313074	0.066896	0.639784	-0.0998087	0.162424	1.0318	0.905011	1.17636
ebi-a-GCST90001724	rcSXY5	ad	CD19 on IgD+ CD24+ B cell	Inverse variance weighted	3	0.0294385	0.0461363	0.523423	-0.0609886	0.119866	1.02988	0.940834	1.12735
ebi-a-GCST90001725	mbMbrU	ad	CD19 on IgD+ CD24- B cell	Inverse variance weighted	3	0.00274294	0.0397853	0.945035	-0.0752363	0.0807222	1.00275	0.927524	1.08407
ebi-a-GCST90001728	ra8uOq	ad	CD19 on IgD+ CD38- unswitched memory B cell	Inverse variance weighted	3	-0.00720689	0.0291718	0.80487	-0.0643837	0.0499699	0.992819	0.937645	1.05124
ebi-a-GCST90001729	XSC2g4	ad	CD19 on IgD+ CD38+ B cell	Inverse variance weighted	5	-0.005071	0.017408	0.770819	-0.0391907	0.0290486	0.994942	0.961567	1.02947
ebi-a-GCST90001730	ksHgIT	ad	CD19 on IgD+ CD38dim B cell	Inverse variance weighted	3	-0.00718841	0.0385478	0.852068	-0.0827421	0.0683652	0.992837	0.920589	1.07076
ebi-a-GCST90001735	GU2PT1	ad	CD19 on IgD- CD38dim B cell	Inverse variance weighted	2	-0.0150259	0.0225306	0.50483	-0.0591858	0.0291341	0.985086	0.942532	1.02956
ebi-a-GCST90001736	oW8ZB6	ad	CD19 on memory B cell	Inverse variance weighted	2	0.0407525	0.0819622	0.61904	-0.119893	0.201398	1.04159	0.887015	1.22311
ebi-a-GCST90001737	JlLPuT	ad	CD19 on naive-mature B cell	Inverse variance weighted	2	0.107994	0.100489	0.282515	-0.0889641	0.304952	1.11404	0.914878	1.35656
ebi-a-GCST90001738	DC0cEY	ad	CD19 on unswitched memory B cell	Inverse variance weighted	3	-0.00932511	0.0391029	0.811512	-0.0859668	0.0673165	0.990718	0.917625	1.06963
ebi-a-GCST90001740	Mfswvn	ad	CD19 on switched memory B cell	Inverse variance weighted	2	0.0360622	0.064382	0.575392	-0.0901266	0.162251	1.03672	0.913815	1.17616
ebi-a-GCST90001741	MVkYm6	ad	CD19 on IgD+ B cell	Inverse variance weighted	2	-0.0109014	0.048686	0.822825	-0.106326	0.0845232	0.989158	0.899131	1.0882
ebi-a-GCST90001742	lYtTiw	ad	CD19 on transitional B cell	Inverse variance weighted	3	-0.00722868	0.0372119	0.845975	-0.0801641	0.0657067	0.992797	0.922965	1.06791
ebi-a-GCST90001743	DyL8uW	ad	CD20 on B cell	Inverse variance weighted	3	0.0201223	0.0294893	0.495011	-0.0376767	0.0779213	1.02033	0.963024	1.08104
ebi-a-GCST90001745	LFPYca	ad	CD20 on CD24+ CD27+ B cell	Inverse variance weighted	4	0.0665044	0.0245187	0.00667989	0.0184478	0.114561	1.06877	1.01862	1.12138
ebi-a-GCST90001746	qeh0kr	ad	CD20 on IgD+ CD24+ B cell	Inverse variance weighted	2	0.0875749	0.0390757	0.0250156	0.0109866	0.164163	1.09152	1.01105	1.17841
ebi-a-GCST90001747	125171	ad	CD20 on IgD+ CD24- B cell	Inverse variance weighted	3	-0.00394528	0.0267186	0.882611	-0.0563138	0.0484232	0.996062	0.945242	1.04961
ebi-a-GCST90001748	oIdGqK	ad	CD20 on IgD+ CD38- B cell	Inverse variance weighted	3	0.0427639	0.0347213	0.218086	-0.0252898	0.110818	1.04369	0.975027	1.11719
ebi-a-GCST90001751	9v3Tyv	ad	CD20 on IgD+ CD38+ B cell	Inverse variance weighted	4	-0.00418468	0.0225347	0.85268	-0.0483526	0.0399833	0.995824	0.952798	1.04079
ebi-a-GCST90001752	Jr80cm	ad	CD20 on IgD+ CD38dim B cell	Inverse variance weighted	5	-0.00813687	0.0214023	0.703806	-0.0500853	0.0338116	0.991896	0.951148	1.03439
ebi-a-GCST90001754	xiOVII	ad	CD20 on IgD- CD27- B cell	Inverse variance weighted	4	0.0192957	0.0289106	0.5045	-0.0373691	0.0759605	1.01948	0.963321	1.07892
ebi-a-GCST90001755	tl4mFu	ad	CD20 on IgD- CD38- B cell	Inverse variance weighted	4	0.0530051	0.0301076	0.0783195	-0.00600585	0.112016	1.05444	0.994012	1.11853
ebi-a-GCST90001757	HdFOLd	ad	CD20 on IgD- CD38dim B cell	Inverse variance weighted	7	0.083347	0.0290546	0.00412253	0.0263999	0.140294	1.08692	1.02675	1.15061
ebi-a-GCST90001758	44y7VH	ad	CD20 on memory B cell	Inverse variance weighted	3	0.132614	0.0488023	0.00658042	0.0369611	0.228266	1.14181	1.03765	1.25642
ebi-a-GCST90001759	sDvfYS	ad	CD20 on naive-mature B cell	Inverse variance weighted	3	-0.0110558	0.0294985	0.707815	-0.0688728	0.0467612	0.989005	0.933445	1.04787
ebi-a-GCST90001760	zuPhrD	ad	CD20 on unswitched memory B cell	Inverse variance weighted	4	0.0760494	0.0279492	0.00650878	0.0212689	0.13083	1.07902	1.0215	1.13977
ebi-a-GCST90001761	IxX3Yk	ad	CD20 on switched memory B cell	Inverse variance weighted	7	0.0765733	0.0302506	0.0113642	0.017282	0.135865	1.07958	1.01743	1.14553
ebi-a-GCST90001762	E9pG3r	ad	CD20 on IgD+ B cell	Inverse variance weighted	3	-0.0176809	0.0274973	0.520219	-0.0715756	0.0362137	0.982474	0.930926	1.03688
ebi-a-GCST90001763	gXuHhZ	ad	CD20 on transitional B cell	Inverse variance weighted	2	0.00998031	0.0282119	0.723517	-0.045315	0.0652756	1.01003	0.955696	1.06745
ebi-a-GCST90001765	9pictr	ad	CD24 on IgD+ CD24+ B cell	Inverse variance weighted	3	-0.029301	0.0184004	0.111292	-0.0653658	0.00676378	0.971124	0.936725	1.00679
ebi-a-GCST90001766	Z45I4H	ad	CD24 on IgD+ CD38- B cell	Inverse variance weighted	2	-0.0508628	0.030475	0.0951178	-0.110594	0.0088683	0.950409	0.895302	1.00891
ebi-a-GCST90001767	EMjTrG	ad	CD24 on IgD+ CD38- unswitched memory B cell	Inverse variance weighted	2	-0.0291756	0.0168385	0.083155	-0.0621791	0.00382797	0.971246	0.939715	1.00384
ebi-a-GCST90001768	v5s54d	ad	CD24 on IgD+ CD38+ B cell	Inverse variance weighted	2	-0.00982266	0.073555	0.893765	-0.15399	0.134345	0.990225	0.85728	1.14379
ebi-a-GCST90001769	DMLVFv	ad	CD24 on IgD- CD38- B cell	Inverse variance weighted	2	-0.0404671	0.0244825	0.0983519	-0.0884529	0.00751867	0.960341	0.915346	1.00755
ebi-a-GCST90001771	Wku3IT	ad	CD24 on memory B cell	Inverse variance weighted	3	-0.0257762	0.0193845	0.183606	-0.0637697	0.0122174	0.974553	0.938221	1.01229
ebi-a-GCST90001772	zUX2Vs	ad	CD24 on unswitched memory B cell	Inverse variance weighted	2	-0.0363577	0.0208213	0.0807796	-0.0771675	0.004452	0.964295	0.925735	1.00446
ebi-a-GCST90001773	w9fCkw	ad	CD24 on switched memory B cell	Inverse variance weighted	2	-0.0317608	0.0211849	0.133817	-0.0732832	0.00976158	0.968738	0.929338	1.00981
ebi-a-GCST90001775	Shf4sD	ad	CD25 on B cell	Inverse variance weighted	3	-0.0273322	0.0258233	0.28986	-0.077946	0.0232816	0.973038	0.925014	1.02355
ebi-a-GCST90001777	pVErsF	ad	CD25 on CD24+ CD27+ B cell	Inverse variance weighted	3	0.0222378	0.0270008	0.410168	-0.0306837	0.0751592	1.02249	0.969782	1.07806
ebi-a-GCST90001778	0B1JEO	ad	CD25 on IgD+ CD24+ B cell	Inverse variance weighted	2	0.0283829	0.0406656	0.485204	-0.0513218	0.108087	1.02879	0.949973	1.11415
ebi-a-GCST90001779	Z24Y33	ad	CD25 on IgD+ CD24- B cell	Inverse variance weighted	4	-0.023218	0.0219118	0.28932	-0.0661651	0.0197291	0.977049	0.935976	1.01992
ebi-a-GCST90001780	LeIx66	ad	CD25 on IgD+ CD38- B cell	Inverse variance weighted	2	-0.0448679	0.0337778	0.18407	-0.111072	0.0213365	0.956124	0.894874	1.02157
ebi-a-GCST90001781	JQLsWq	ad	CD25 on IgD+ CD38- naive B cell	Inverse variance weighted	2	-0.0310581	0.0283227	0.272826	-0.0865707	0.0244545	0.969419	0.917071	1.02476
ebi-a-GCST90001783	RDvlDQ	ad	CD25 on IgD+ CD38+ B cell	Inverse variance weighted	2	-0.0374308	0.037351	0.316278	-0.110639	0.0357772	0.963261	0.895262	1.03642
ebi-a-GCST90001784	RHDFjB	ad	CD25 on IgD+ CD38dim B cell	Inverse variance weighted	3	-0.00999799	0.0218697	0.647554	-0.0528625	0.0328666	0.990052	0.94851	1.03341
ebi-a-GCST90001785	7pPX5G	ad	CD25 on IgD- CD24- B cell	Inverse variance weighted	2	0.0597495	0.226762	0.792173	-0.384705	0.504204	1.06157	0.680651	1.65567
ebi-a-GCST90001786	SQrTm0	ad	CD25 on IgD- CD27- B cell	Inverse variance weighted	2	-0.0134384	0.04429	0.761572	-0.100247	0.0733701	0.986652	0.904614	1.07613
ebi-a-GCST90001787	CD8zrZ	ad	CD25 on IgD- CD38- B cell	Inverse variance weighted	3	0.0372068	0.0230272	0.106143	-0.00792658	0.0823402	1.03791	0.992105	1.08583
ebi-a-GCST90001789	7UNlHL	ad	CD25 on IgD- CD38dim B cell	Inverse variance weighted	3	-0.0367294	0.0221526	0.0973136	-0.0801485	0.00668966	0.963937	0.922979	1.00671
ebi-a-GCST90001790	iyyyfx	ad	CD25 on memory B cell	Inverse variance weighted	3	0.0223861	0.0271072	0.408896	-0.0307439	0.0755162	1.02264	0.969724	1.07844
ebi-a-GCST90001791	JcCvBn	ad	CD25 on naive-mature B cell	Inverse variance weighted	4	-0.0268073	0.0221479	0.226136	-0.0702173	0.0166027	0.973549	0.932191	1.01674
ebi-a-GCST90001792	0whGPu	ad	CD25 on unswitched memory B cell	Inverse variance weighted	3	0.0220011	0.028825	0.445307	-0.034496	0.0784981	1.02224	0.966092	1.08166
ebi-a-GCST90001793	ajzTpO	ad	CD25 on switched memory B cell	Inverse variance weighted	2	-0.0379947	0.023364	0.103905	-0.0837881	0.00779867	0.962718	0.919626	1.00783
ebi-a-GCST90001794	MSZabd	ad	CD25 on IgD+ B cell	Inverse variance weighted	2	-0.0302605	0.0298473	0.310659	-0.0887612	0.0282403	0.970193	0.915064	1.02864
ebi-a-GCST90001798	YdA0Qm	ad	CD27 on CD24+ CD27+ B cell	Inverse variance weighted	11	0.0020746	0.0163602	0.899093	-0.0299914	0.0341406	1.00208	0.970454	1.03473
ebi-a-GCST90001800	SisK8F	ad	CD27 on IgD+ CD24+ B cell	Inverse variance weighted	7	0.00734485	0.0217399	0.735475	-0.0352653	0.049955	1.00737	0.965349	1.05122
ebi-a-GCST90001801	zJJZ7T	ad	CD27 on IgD+ CD38- unswitched memory B cell	Inverse variance weighted	4	0.00413445	0.0212406	0.845668	-0.0374971	0.045766	1.00414	0.963197	1.04683
ebi-a-GCST90001802	rwzTLV	ad	CD27 on IgD- CD38- B cell	Inverse variance weighted	7	-0.00375896	0.0161323	0.815754	-0.0353782	0.0278603	0.996248	0.96524	1.02825
ebi-a-GCST90001803	5aqxYF	ad	CD27 on IgD- CD38+ B cell	Inverse variance weighted	2	0.0309873	0.0469587	0.509328	-0.0610517	0.123026	1.03147	0.940775	1.13091
ebi-a-GCST90001804	1Vq6c5	ad	CD27 on IgD- CD38dim B cell	Inverse variance weighted	9	-0.00282075	0.0173328	0.870722	-0.036793	0.0311515	0.997183	0.963876	1.03164
ebi-a-GCST90001805	6XfMp6	ad	CD27 on memory B cell	Inverse variance weighted	8	0.0128506	0.0178516	0.471614	-0.0221385	0.0478396	1.01293	0.978105	1.049
ebi-a-GCST90001806	xVsu9U	ad	CD27 on unswitched memory B cell	Inverse variance weighted	10	0.00661894	0.0166039	0.69016	-0.0259247	0.0391626	1.00664	0.974408	1.03994
ebi-a-GCST90001808	mulhyR	ad	CD27 on switched memory B cell	Inverse variance weighted	10	-0.000168	0.0156576	0.99143	-0.0308571	0.0305207	0.999832	0.969614	1.03099
ebi-a-GCST90001811	4ZpEU6	ad	CD38 on IgD+ CD24- B cell	Inverse variance weighted	2	-0.00395609	0.0322109	0.902251	-0.0670895	0.0591773	0.996052	0.935112	1.06096
ebi-a-GCST90001812	GW4Fna	ad	CD38 on IgD+ CD38+ B cell	Inverse variance weighted	2	0.0448353	0.0363283	0.217139	-0.0263681	0.116039	1.04586	0.973976	1.12304
ebi-a-GCST90001813	2dwq4s	ad	CD38 on IgD+ CD38dim B cell	Inverse variance weighted	4	0.0151218	0.0194847	0.437697	-0.0230681	0.0533118	1.01524	0.977196	1.05476
ebi-a-GCST90001815	hOt64P	ad	CD38 on IgD- CD38dim B cell	Inverse variance weighted	4	0.014871	0.0212419	0.48388	-0.0267633	0.0565052	1.01498	0.973592	1.05813
ebi-a-GCST90001816	sDiMPv	ad	CD38 on naive-mature B cell	Inverse variance weighted	4	0.0168754	0.0232209	0.467391	-0.0286377	0.0623884	1.01702	0.971769	1.06438
ebi-a-GCST90001819	1aqFBG	ad	CD38 on transitional B cell	Inverse variance weighted	5	0.0105694	0.0184954	0.567686	-0.0256816	0.0468205	1.01063	0.974645	1.04793
ebi-a-GCST90001820	4SOoW3	ad	IgD on IgD+ CD24+ B cell	Inverse variance weighted	6	0.00032	0.0494424	0.994829	-0.0965867	0.0972276	1.00032	0.907931	1.10211
ebi-a-GCST90001821	jyTpWf	ad	IgD on IgD+ CD24- B cell	Inverse variance weighted	3	0.033509	0.0275995	0.224703	-0.020586	0.087604	1.03408	0.979624	1.09156
ebi-a-GCST90001824	KRT2Np	ad	IgD on IgD+ CD38+ B cell	Inverse variance weighted	2	0.027142	0.0326143	0.40529	-0.0367821	0.0910661	1.02751	0.963886	1.09534
ebi-a-GCST90001825	lSRUwW	ad	IgD on IgD+ CD38dim B cell	Inverse variance weighted	3	0.0327833	0.0271754	0.227679	-0.0204805	0.0860472	1.03333	0.979728	1.08986
ebi-a-GCST90001826	EKyMwD	ad	IgD on unswitched memory B cell	Inverse variance weighted	6	0.0226041	0.0569988	0.691684	-0.0891135	0.134322	1.02286	0.914742	1.14376
ebi-a-GCST90001828	zyLT6t	ad	IgD on transitional B cell	Inverse variance weighted	3	-0.0266193	0.0420169	0.526383	-0.108972	0.0557339	0.973732	0.896755	1.05732
ebi-a-GCST90001829	3zttjK	ad	BAFF-R on B cell	Inverse variance weighted	21	-0.00553983	0.0081612	0.497264	-0.0215358	0.0104561	0.994475	0.978694	1.01051
ebi-a-GCST90001831	uYwahx	ad	CD62L on CD62L+ myeloid Dendritic Cell	Inverse variance weighted	2	0.0211511	0.0272615	0.437832	-0.0322814	0.0745837	1.02138	0.968234	1.07744
ebi-a-GCST90001832	dpL93N	ad	CD62L on CD62L+ plasmacytoid Dendritic Cell	Inverse variance weighted	2	-0.0366484	0.0692844	0.596837	-0.172446	0.0991491	0.964015	0.841604	1.10423
ebi-a-GCST90001833	fHjv2q	ad	CD62L on CD62L+ Dendritic Cell	Inverse variance weighted	2	0.00607005	0.0348099	0.861569	-0.0621574	0.0742975	1.00609	0.939735	1.07713
ebi-a-GCST90001838	sigCzA	ad	CD3 on naive CD8+ T cell	Inverse variance weighted	8	0.0142437	0.01839	0.438613	-0.0218006	0.050288	1.01435	0.978435	1.05157
ebi-a-GCST90001839	HWkBXe	ad	CD3 on Effector Memory CD8+ T cell	Inverse variance weighted	3	0.022441	0.0254284	0.377497	-0.0273987	0.0722806	1.02269	0.972973	1.07496
ebi-a-GCST90001841	1992Pl	ad	CD3 on Central Memory CD4+ T cell	Inverse variance weighted	5	0.014578	0.0199942	0.465935	-0.0246107	0.0537667	1.01468	0.97569	1.05524
ebi-a-GCST90001842	5j1tK6	ad	CD3 on Naive CD4+ T cell	Inverse variance weighted	6	0.0126437	0.0147528	0.391427	-0.0162719	0.0415592	1.01272	0.98386	1.04243
ebi-a-GCST90001845	r5XEfg	ad	CD3 on CD45RA- CD4+ T cell	Inverse variance weighted	4	0.0189611	0.0229283	0.408252	-0.0259784	0.0639006	1.01914	0.974356	1.06599
ebi-a-GCST90001846	jE5yV2	ad	CD3 on Central Memory CD8+ T cell	Inverse variance weighted	4	0.0107632	0.03071	0.725981	-0.0494285	0.0709548	1.01082	0.951773	1.07353
ebi-a-GCST90001847	ZQ0IYb	ad	CD3 on HLA DR+ T cell	Inverse variance weighted	2	0.0227189	0.0525343	0.665408	-0.0802484	0.125686	1.02298	0.922887	1.13393
ebi-a-GCST90001848	hV1s4S	ad	CD3 on Natural Killer T	Inverse variance weighted	2	0.011295	0.0368956	0.759503	-0.0610203	0.0836102	1.01136	0.940804	1.08721
ebi-a-GCST90001851	NJLPtH	ad	CD3 on T cell	Inverse variance weighted	3	0.0325865	0.0191347	0.0885661	-0.0049174	0.0700905	1.03312	0.995095	1.07261
ebi-a-GCST90001853	ZOK01v	ad	CD3 on activated CD4 regulatory T cell	Inverse variance weighted	6	0.0142243	0.0107489	0.18573	-0.00684367	0.0352922	1.01433	0.99318	1.03592
ebi-a-GCST90001854	IJXpij	ad	CD3 on CD39+ activated CD4 regulatory T cell	Inverse variance weighted	6	0.0108995	0.0136464	0.424462	-0.0158475	0.0376465	1.01096	0.984277	1.03836
ebi-a-GCST90001855	Lik0Gb	ad	CD3 on secreting CD4 regulatory T cell	Inverse variance weighted	4	0.0140713	0.014524	0.33263	-0.0143958	0.0425384	1.01417	0.985707	1.04346
ebi-a-GCST90001856	5AfbTE	ad	CD3 on CD39+ secreting CD4 regulatory T cell	Inverse variance weighted	5	0.011069	0.0200457	0.580818	-0.0282205	0.0503586	1.01113	0.972174	1.05165
ebi-a-GCST90001857	Ldoexc	ad	CD3 on activated & secreting CD4 regulatory T cell	Inverse variance weighted	6	0.0155839	0.0104872	0.137281	-0.00497099	0.0361388	1.01571	0.995041	1.0368
ebi-a-GCST90001858	gIrbgk	ad	CD3 on CD45RA+ CD4+ T cell	Inverse variance weighted	8	0.01379	0.0144963	0.341463	-0.0146227	0.0422026	1.01389	0.985484	1.04311
ebi-a-GCST90001859	qiAGRL	ad	CD3 on CD8+ T cell	Inverse variance weighted	3	0.0246683	0.0209193	0.238313	-0.0163335	0.0656702	1.02498	0.983799	1.06787
ebi-a-GCST90001860	SiaogK	ad	CD3 on CD39+ CD4+ T cell	Inverse variance weighted	5	0.0173208	0.0108787	0.111344	-0.00400138	0.038643	1.01747	0.996007	1.0394
ebi-a-GCST90001861	zJI4Wu	ad	CD3 on CD28+ CD4+ T cell	Inverse variance weighted	3	0.0337035	0.016207	0.037565	0.00193786	0.0654691	1.03428	1.00194	1.06766
ebi-a-GCST90001863	AlFkgi	ad	CD3 on CD28+ CD45RA- CD8+ T cell	Inverse variance weighted	5	0.029627	0.0166868	0.0758191	-0.00307909	0.0623331	1.03007	0.996926	1.06432
ebi-a-GCST90001864	YzQcl2	ad	CD3 on CD28+ CD45RA+ CD8+ T cell	Inverse variance weighted	7	0.0171335	0.0147682	0.245983	-0.0118122	0.0460792	1.01728	0.988257	1.04716
ebi-a-GCST90001867	r5hrIY	ad	CD3 on CD4+ T cell	Inverse variance weighted	3	0.0113098	0.0244995	0.644345	-0.0367092	0.0593287	1.01137	0.963956	1.06112
ebi-a-GCST90001868	JJXyZv	ad	CD3 on CD4 regulatory T cell	Inverse variance weighted	5	0.013446	0.0119198	0.259305	-0.00991685	0.0368088	1.01354	0.990132	1.03749
ebi-a-GCST90001869	WbXu6p	ad	CD3 on resting CD4 regulatory T cell	Inverse variance weighted	7	-0.01767	0.0150522	0.240432	-0.0471724	0.0118324	0.982485	0.953923	1.0119
ebi-a-GCST90001870	aq3DI1	ad	CD34 on Hematopoietic Stem Cell	Inverse variance weighted	4	0.0305337	0.0391784	0.435773	-0.046256	0.107323	1.031	0.954798	1.11329
ebi-a-GCST90001872	FZOhTd	ad	HVEM on naive CD8+ T cell	Inverse variance weighted	2	0.0502577	0.0257497	0.0509645	-0.000212	0.100727	1.05154	0.999788	1.10597
ebi-a-GCST90001883	DrHRbu	ad	CD16-CD56 on Natural Killer T	Inverse variance weighted	7	0.0130249	0.0217058	0.548463	-0.0295184	0.0555682	1.01311	0.970913	1.05714
ebi-a-GCST90001884	uH5Eyv	ad	CD16-CD56 on Natural Killer	Inverse variance weighted	9	-0.0204665	0.0139324	0.141838	-0.047774	0.00684112	0.979742	0.953349	1.00686
ebi-a-GCST90001885	MrR1LE	ad	CD16-CD56 on HLA DR+ Natural Killer	Inverse variance weighted	2	0.0789312	0.0414038	0.0566015	-0.00222026	0.160083	1.08213	0.997782	1.17361
ebi-a-GCST90001886	erpCXO	ad	CD28 on CD39+ activated CD4 regulatory T cell	Inverse variance weighted	3	0.0243476	0.0360114	0.498972	-0.0462348	0.0949301	1.02465	0.954818	1.09958
ebi-a-GCST90001887	vM22Za	ad	CD28 on secreting CD4 regulatory T cell	Inverse variance weighted	4	0.0228915	0.0392171	0.559414	-0.053974	0.0997571	1.02316	0.947457	1.1049
ebi-a-GCST90001888	AEBbji	ad	CD28 on CD39+ secreting CD4 regulatory T cell	Inverse variance weighted	2	0.05282	0.0189657	0.00535218	0.0156473	0.0899927	1.05424	1.01577	1.09417
ebi-a-GCST90001889	IPeyj9	ad	CD28 on activated & secreting CD4 regulatory T cell	Inverse variance weighted	2	-0.0117987	0.0231014	0.609535	-0.0570774	0.03348	0.988271	0.944521	1.03405
ebi-a-GCST90001890	5abaDt	ad	CD28 on CD45RA+ CD4+ T cell	Inverse variance weighted	2	0.023636	0.0424367	0.577547	-0.0595399	0.106812	1.02392	0.942198	1.11272
ebi-a-GCST90001891	5uRLx9	ad	CD28 on CD45RA- CD4 not regulatory T cell	Inverse variance weighted	3	-0.00402832	0.0200683	0.840909	-0.0433622	0.0353056	0.99598	0.957564	1.03594
ebi-a-GCST90001892	D3LvOB	ad	CD28 on CD39+ CD4+ T cell	Inverse variance weighted	8	0.013873	0.0161288	0.389714	-0.0177395	0.0454855	1.01397	0.982417	1.04654
ebi-a-GCST90001893	uIirZs	ad	CD28 on CD28+ CD45RA- CD8+ T cell	Inverse variance weighted	2	-0.0102683	0.0202806	0.612638	-0.0500184	0.0294817	0.989784	0.951212	1.02992
ebi-a-GCST90001894	8ML4BV	ad	CD28 on CD28+ CD4+ T cell	Inverse variance weighted	3	0.0107651	0.0328795	0.743357	-0.0536788	0.075209	1.01082	0.947737	1.07811
ebi-a-GCST90001896	kWQqMP	ad	CD28 on CD28+ CD45RA+ CD8+ T cell	Inverse variance weighted	2	0.039901	0.0223854	0.0746745	-0.00397433	0.0837763	1.04071	0.996034	1.08739
ebi-a-GCST90001897	44e3Qz	ad	CD28 on CD39+ CD8+ T cell	Inverse variance weighted	2	-0.0194979	0.0105739	0.0651886	-0.0402228	0.00122697	0.980691	0.960575	1.00123
ebi-a-GCST90001898	OHx3fW	ad	CD28 on CD4+ T cell	Inverse variance weighted	3	0.010685	0.0344868	0.756692	-0.0569092	0.0782791	1.01074	0.94468	1.08142
ebi-a-GCST90001899	fgi5DR	ad	CD28 on CD4 regulatory T cell	Inverse variance weighted	2	-0.0140275	0.0261545	0.591728	-0.0652904	0.0372353	0.98607	0.936795	1.03794
ebi-a-GCST90001900	LnXNsg	ad	CD28 on resting CD4 regulatory T cell	Inverse variance weighted	2	-0.0166871	0.0188902	0.377035	-0.0537119	0.0203377	0.983451	0.947705	1.02055
ebi-a-GCST90001901	sqOVIs	ad	CD28 on CD39+ resting CD4 regulatory T cell	Inverse variance weighted	2	0.11201	0.0518848	0.0308645	0.0103155	0.213704	1.11852	1.01037	1.23826
ebi-a-GCST90001902	yyfAox	ad	CD28 on activated CD4 regulatory T cell	Inverse variance weighted	2	-0.0128521	0.0256553	0.616404	-0.0631365	0.0374323	0.98723	0.938815	1.03814
ebi-a-GCST90001906	uhFM6l	ad	CD86 on granulocyte	Inverse variance weighted	2	0.12412	0.0408751	0.0023929	0.0440047	0.204235	1.13215	1.04499	1.22659
ebi-a-GCST90001907	j4dGKn	ad	CCR7 on naive CD4+ T cell	Inverse variance weighted	4	0.024442	0.0306027	0.424471	-0.0355393	0.0844233	1.02474	0.965085	1.08809
ebi-a-GCST90001908	FdEr4T	ad	CCR7 on naive CD8+ T cell	Inverse variance weighted	2	0.0661102	0.0727291	0.363354	-0.0764389	0.208659	1.06834	0.92641	1.23203
ebi-a-GCST90001910	m86dFn	ad	CD45 on B cell	Inverse variance weighted	2	0.0664439	0.0764363	0.384699	-0.0833714	0.216259	1.0687	0.920009	1.24142
ebi-a-GCST90001911	6Bnnvr	ad	CD45 on Natural Killer	Inverse variance weighted	2	0.0434808	0.036892	0.238558	-0.0288274	0.115789	1.04444	0.971584	1.12276
ebi-a-GCST90001917	FfVovn	ad	CD45 on CD8+ T cell	Inverse variance weighted	2	-0.0126409	0.0109818	0.2497	-0.0341653	0.00888342	0.987439	0.966412	1.00892
ebi-a-GCST90001920	vFZRCJ	ad	CD45 on HLA DR+ CD4+ T cell	Inverse variance weighted	2	-0.0213273	0.0989357	0.829325	-0.215241	0.172587	0.978899	0.806347	1.18837
ebi-a-GCST90001924	A7iLcL	ad	CD127 on CD28+ CD4+ T cell	Inverse variance weighted	2	0.0617709	0.0834827	0.459346	-0.101855	0.225397	1.06372	0.90316	1.25282
ebi-a-GCST90001926	iDhplJ	ad	CD127 on granulocyte	Inverse variance weighted	8	-0.0111006	0.0185353	0.549245	-0.0474298	0.0252286	0.988961	0.953677	1.02555
ebi-a-GCST90001932	kMnbXz	ad	CD127 on CD45RA+ CD4+ T cell	Inverse variance weighted	4	0.0348468	0.0456256	0.445013	-0.0545793	0.124273	1.03546	0.946883	1.13232
ebi-a-GCST90001944	fCiWRT	ad	CD123 on plasmacytoid Dendritic Cell	Inverse variance weighted	2	-0.0460015	0.0709832	0.516945	-0.185129	0.0931255	0.955041	0.830997	1.0976
ebi-a-GCST90001945	DZ2Mfx	ad	CD123 on CD62L+ plasmacytoid Dendritic Cell	Inverse variance weighted	2	-0.0467014	0.0714547	0.513382	-0.186753	0.0933498	0.954372	0.829649	1.09785
ebi-a-GCST90001946	VGlAAY	ad	CD33 on CD14+ monocyte	Inverse variance weighted	8	0.022855	0.00733556	0.00183545	0.00847728	0.0372327	1.02312	1.00851	1.03793
ebi-a-GCST90001947	UEHLz0	ad	CD33 on CD33+ HLA DR+ CD14dim	Inverse variance weighted	6	0.0258517	0.0069777	0.000211	0.0121755	0.039528	1.02619	1.01225	1.04032
ebi-a-GCST90001948	0pUxFy	ad	CD33 on CD33dim HLA DR+ CD11b+	Inverse variance weighted	7	0.0230417	0.00758149	0.00237204	0.00818198	0.0379014	1.02331	1.00822	1.03863
ebi-a-GCST90001949	5td6iy	ad	CD33 on CD33dim HLA DR+ CD11b-	Inverse variance weighted	7	0.0209266	0.00883177	0.0178138	0.00361631	0.0382369	1.02115	1.00362	1.03898
ebi-a-GCST90001950	MjVxTn	ad	CD33 on Granulocytic Myeloid-Derived Suppressor Cells	Inverse variance weighted	3	0.0306038	0.0103281	0.0030449	0.0103608	0.0508469	1.03108	1.01041	1.05216
ebi-a-GCST90001951	RCNrSy	ad	CD33 on CD66b++ myeloid cell	Inverse variance weighted	6	0.0274242	0.00852416	0.00129432	0.0107169	0.0441316	1.0278	1.01077	1.04512
ebi-a-GCST90001952	horFa4	ad	CD33 on Monocytic Myeloid-Derived Suppressor Cells	Inverse variance weighted	4	0.0261237	0.00750919	0.000503	0.0114057	0.0408417	1.02647	1.01147	1.04169
ebi-a-GCST90001953	lWHSCu	ad	CD33 on CD33dim HLA DR-	Inverse variance weighted	5	0.0243604	0.00738772	0.000976	0.00988045	0.0388403	1.02466	1.00993	1.0396
ebi-a-GCST90001954	dcPQXI	ad	CD33 on basophil	Inverse variance weighted	8	0.0180083	0.00709918	0.0111912	0.00409388	0.0319227	1.01817	1.0041	1.03244
ebi-a-GCST90001955	gjui1T	ad	CD33 on Immature Myeloid-Derived Suppressor Cells	Inverse variance weighted	6	0.0197509	0.00750513	0.00849697	0.00504087	0.034461	1.01995	1.00505	1.03506
ebi-a-GCST90001956	WhwnGC	ad	CD33 on CD33+ HLA DR+	Inverse variance weighted	5	0.0247834	0.00705596	0.000444	0.0109537	0.0386131	1.02509	1.01101	1.03937
ebi-a-GCST90001957	SvpGGr	ad	CD33 on CD33+ HLA DR+ CD14-	Inverse variance weighted	5	0.0246955	0.00702893	0.000442	0.0109188	0.0384722	1.025	1.01098	1.03922
ebi-a-GCST90001959	JuyeVO	ad	CD4 on HLA DR+ CD4+ T cell	Inverse variance weighted	2	-0.0806305	0.0790822	0.307929	-0.235632	0.0743707	0.922535	0.790072	1.07721
ebi-a-GCST90001961	z1wfSc	ad	CD25 on CD39+ CD4+ T cell	Inverse variance weighted	9	-0.0099718	0.0148323	0.50139	-0.0390431	0.0190995	0.990078	0.961709	1.01928
ebi-a-GCST90001963	3PbSJY	ad	FSC-A on myeloid Dendritic Cell	Inverse variance weighted	3	-0.0241942	0.0417015	0.561796	-0.105929	0.0575407	0.976096	0.899488	1.05923
ebi-a-GCST90001964	hUaYb5	ad	FSC-A on plasmacytoid Dendritic Cell	Inverse variance weighted	4	-0.0104119	0.0553684	0.850839	-0.118934	0.0981102	0.989642	0.887866	1.10308
ebi-a-GCST90001965	8yLQoo	ad	FSC-A on monocyte	Inverse variance weighted	2	-0.043091	0.0385734	0.263945	-0.118695	0.0325129	0.957824	0.888079	1.03305
ebi-a-GCST90001969	01dGA9	ad	FSC-A on Natural Killer	Inverse variance weighted	3	-0.0273405	0.0274103	0.318544	-0.0810647	0.0263836	0.97303	0.922134	1.02673
ebi-a-GCST90001970	lWKfKG	ad	FSC-A on HLA DR+ Natural Killer	Inverse variance weighted	3	-0.0208706	0.0304255	0.492741	-0.0805046	0.0387635	0.979346	0.922651	1.03952
ebi-a-GCST90001973	IGP7qb	ad	FSC-A on CD4+ T cell	Inverse variance weighted	2	0.183756	0.061254	0.0027006	0.0636986	0.303814	1.20172	1.06577	1.35502
ebi-a-GCST90001976	jymM64	ad	FSC-A on Natural Killer T	Inverse variance weighted	2	0.0353293	0.0447709	0.430046	-0.0524217	0.12308	1.03596	0.948929	1.13098
ebi-a-GCST90001979	5UFIei	ad	CD16 on CD14- CD16+ monocyte	Inverse variance weighted	10	-0.0107551	0.0109811	0.327373	-0.0322782	0.0107679	0.989302	0.968237	1.01083
ebi-a-GCST90001980	KHlT5p	ad	CD40 on CD14+ CD16- monocyte	Inverse variance weighted	4	0.00840154	0.0106232	0.42902	-0.0124199	0.029223	1.00844	0.987657	1.02965
ebi-a-GCST90001981	4yOTHe	ad	CD40 on CD14+ CD16+ monocyte	Inverse variance weighted	5	0.0113127	0.010855	0.297337	-0.00996314	0.0325885	1.01138	0.990086	1.03313
ebi-a-GCST90001983	fbLsrf	ad	CD14 on CD14+ CD16+ monocyte	Inverse variance weighted	2	0.0482065	0.0353669	0.172869	-0.0211125	0.117526	1.04939	0.979109	1.12471
ebi-a-GCST90001984	xmVR0J	ad	HLA DR on CD14- CD16+ monocyte	Inverse variance weighted	6	-0.00899327	0.0288542	0.755284	-0.0655475	0.047561	0.991047	0.936555	1.04871
ebi-a-GCST90001985	wjYDN3	ad	CD40 on monocytes	Inverse variance weighted	6	0.0125055	0.00953569	0.189708	-0.00618445	0.0311955	1.01258	0.993835	1.03169
ebi-a-GCST90001987	MzuIRj	ad	CD64 on CD14+ CD16- monocyte	Inverse variance weighted	18	0.00858338	0.00907971	0.344487	-0.00921285	0.0263796	1.00862	0.990829	1.02673
ebi-a-GCST90001988	b0D2Fn	ad	HLA DR on CD14+ CD16- monocyte	Inverse variance weighted	9	-0.0459696	0.014613	0.00165636	-0.0746111	-0.0173281	0.955071	0.928104	0.982821
ebi-a-GCST90001989	Iv7prw	ad	CD40 on CD14- CD16+ monocyte	Inverse variance weighted	9	0.0157283	0.00907248	0.0829842	-0.00205376	0.0335104	1.01585	0.997948	1.03408
ebi-a-GCST90001991	AY2ICl	ad	HLA DR on CD14+ monocyte	Inverse variance weighted	8	-0.0466669	0.0152473	0.00220842	-0.0765515	-0.0167822	0.954405	0.926305	0.983358
ebi-a-GCST90001995	vTB6Gf	ad	CX3CR1 on monocyte	Inverse variance weighted	2	-0.031686	0.017362	0.0679984	-0.0657156	0.00234357	0.968811	0.936397	1.00235
ebi-a-GCST90001996	yqN1XA	ad	CX3CR1 on CD14+ CD16+ monocyte	Inverse variance weighted	2	-0.027707	0.0171391	0.105965	-0.0612996	0.00588556	0.972673	0.940541	1.0059
ebi-a-GCST90001997	DUfSji	ad	CX3CR1 on CD14+ CD16- monocyte	Inverse variance weighted	2	-0.0286558	0.0155174	0.0647921	-0.0590698	0.00175828	0.971751	0.942641	1.00176
ebi-a-GCST90002001	joVtKh	ad	CD64 on CD14- CD16-	Inverse variance weighted	2	0.0434694	0.0442279	0.325681	-0.0432173	0.130156	1.04443	0.957703	1.13901
ebi-a-GCST90002003	ywEqNR	ad	CCR2 on CD14- CD16-	Inverse variance weighted	3	-0.0165231	0.0343209	0.630211	-0.0837921	0.0507459	0.983613	0.919622	1.05206
ebi-a-GCST90002004	fLNwE0	ad	CCR2 on CD14+ CD16- monocyte	Inverse variance weighted	3	0.00680135	0.0277466	0.80636	-0.047582	0.0611847	1.00682	0.953532	1.0631
ebi-a-GCST90002005	2OmrRH	ad	CD16 on CD14+ CD16+ monocyte	Inverse variance weighted	7	-0.0279286	0.0152967	0.0678817	-0.05791	0.00205295	0.972458	0.943735	1.00206
ebi-a-GCST90002006	ZA7l6Y	ad	CD64 on monocyte	Inverse variance weighted	17	0.00515014	0.00955098	0.589731	-0.0135698	0.0238701	1.00516	0.986522	1.02416
ebi-a-GCST90002007	C6DjmL	ad	HLA DR on CD14+ CD16+ monocyte	Inverse variance weighted	6	0.0131348	0.0147054	0.371751	-0.0156877	0.0419574	1.01322	0.984435	1.04285
ebi-a-GCST90002008	xppglQ	ad	CCR2 on monocyte	Inverse variance weighted	2	0.00795004	0.0302399	0.792628	-0.0513201	0.0672202	1.00798	0.949974	1.06953
ebi-a-GCST90002009	fbwYOq	ad	HLA DR on CD14- CD16-	Inverse variance weighted	8	0.016088	0.0220821	0.466275	-0.027193	0.059369	1.01622	0.973173	1.06117
ebi-a-GCST90002010	q0KzY4	ad	HLA DR on monocyte	Inverse variance weighted	8	-0.0441123	0.0113094	9.6e-05	-0.0662787	-0.021946	0.956846	0.93587	0.978293
ebi-a-GCST90002011	rRFgfd	ad	CD64 on CD14+ CD16+ monocyte	Inverse variance weighted	2	-0.0482457	0.0428915	0.260661	-0.132313	0.0358217	0.9529	0.876067	1.03647
ebi-a-GCST90002012	IEkNkX	ad	CX3CR1 on CD14- CD16+ monocyte	Inverse variance weighted	2	-0.0199183	0.0574494	0.728809	-0.132519	0.0926825	0.980279	0.875886	1.09711
ebi-a-GCST90002013	8LuQcI	ad	CCR2 on myeloid Dendritic Cell	Inverse variance weighted	2	-0.0320193	0.0381845	0.401726	-0.106861	0.0428223	0.968488	0.898651	1.04375
ebi-a-GCST90002014	aHrrKy	ad	CCR2 on CD62L+ myeloid Dendritic Cell	Inverse variance weighted	2	0.0342291	0.0315394	0.277797	-0.027588	0.0960462	1.03482	0.972789	1.10081
ebi-a-GCST90002015	0fyLcm	ad	CCR2 on plasmacytoid Dendritic Cell	Inverse variance weighted	2	-0.00878457	0.0546463	0.872288	-0.115891	0.0983221	0.991254	0.890572	1.10332
ebi-a-GCST90002016	SdkacU	ad	CCR2 on CD62L+ plasmacytoid Dendritic Cell	Inverse variance weighted	2	-0.00877426	0.0547828	0.872751	-0.116149	0.0986	0.991264	0.890343	1.10362
ebi-a-GCST90002017	M7L6Kb	ad	CCR2 on monocyte	Inverse variance weighted	2	0.0232374	0.0200806	0.247189	-0.0161207	0.0625954	1.02351	0.984009	1.0646
ebi-a-GCST90002022	RTvRun	ad	CD4 on CD4+ T cell	Inverse variance weighted	2	-0.0567603	0.0377686	0.132879	-0.130787	0.0172661	0.94482	0.877405	1.01742
ebi-a-GCST90002024	tJmG9b	ad	CD4 on naive CD4+ T cell	Inverse variance weighted	5	-0.0568624	0.0372694	0.127081	-0.12991	0.0161856	0.944724	0.878174	1.01632
ebi-a-GCST90002025	Yqv6lz	ad	CD4 on Effector Memory CD4+ T cell	Inverse variance weighted	2	0.0263074	0.0706483	0.709616	-0.112163	0.164778	1.02666	0.893898	1.17913
ebi-a-GCST90002029	TbxUd7	ad	CD39 on CD39+ CD8+ T cell	Inverse variance weighted	2	-0.0472812	0.0401666	0.239146	-0.126008	0.0314455	0.953819	0.881608	1.03195
ebi-a-GCST90002030	pvpOdh	ad	CD39 on CD39+ activated CD4 regulatory T cell	Inverse variance weighted	11	-0.00556808	0.0115835	0.630736	-0.0282717	0.0171356	0.994447	0.972124	1.01728
ebi-a-GCST90002031	BVLqAr	ad	CD39 on CD39+ secreting CD4 regulatory T cell	Inverse variance weighted	13	0.0123984	0.00809572	0.125652	-0.00346922	0.028266	1.01248	0.996537	1.02867
ebi-a-GCST90002032	H3eIir	ad	CD39 on CD39+ CD4+ T cell	Inverse variance weighted	12	0.0112604	0.00802294	0.160461	-0.00446458	0.0269854	1.01132	0.995545	1.02735
ebi-a-GCST90002033	QdHcCq	ad	CD39 on granulocyte	Inverse variance weighted	3	0.0913646	0.0321192	0.00444747	0.0284109	0.154318	1.09567	1.02882	1.16686
ebi-a-GCST90002034	RPOJxa	ad	CD39 on monocyte	Inverse variance weighted	2	0.00941794	0.0478278	0.843895	-0.0843245	0.10316	1.00946	0.919133	1.10867
ebi-a-GCST90002035	zgC7mV	ad	CD80 on myeloid Dendritic Cell	Inverse variance weighted	4	0.0396642	0.0382642	0.299927	-0.0353335	0.114662	1.04046	0.965283	1.12149
ebi-a-GCST90002036	iV9Jw1	ad	CD80 on CD62L+ myeloid Dendritic Cell	Inverse variance weighted	3	0.0191032	0.0506248	0.705914	-0.0801214	0.118328	1.01929	0.923004	1.12561
ebi-a-GCST90002037	V14j4f	ad	CD80 on plasmacytoid Dendritic Cell	Inverse variance weighted	2	-0.0494765	0.07485	0.508607	-0.196183	0.0972296	0.951728	0.821862	1.10211
ebi-a-GCST90002038	L7K7Vv	ad	CD80 on CD62L+ plasmacytoid Dendritic Cell	Inverse variance weighted	2	-0.0502607	0.0752527	0.504202	-0.197756	0.0972346	0.950981	0.82057	1.10212
ebi-a-GCST90002039	4P3SFb	ad	CD80 on monocyte	Inverse variance weighted	7	-0.0064493	0.0146047	0.658785	-0.0350745	0.0221759	0.993571	0.965533	1.02242
ebi-a-GCST90002040	SPL66E	ad	CD80 on granulocyte	Inverse variance weighted	3	0.0632433	0.0348367	0.0694594	-0.00503669	0.131523	1.06529	0.994976	1.14056
ebi-a-GCST90002045	M6nUDh	ad	CD45 on CD33- HLA DR-	Inverse variance weighted	2	0.0492545	0.0258026	0.0562752	-0.00131855	0.0998275	1.05049	0.998682	1.10498
ebi-a-GCST90002052	9spVsZ	ad	CD45 on Immature Myeloid-Derived Suppressor Cells	Inverse variance weighted	2	-0.0676388	0.0154583	1.21e-05	-0.097937	-0.0373406	0.934598	0.906706	0.963348
ebi-a-GCST90002054	AgixsW	ad	CD8 on Central Memory CD8+ T cell	Inverse variance weighted	3	0.0203001	0.0246306	0.409836	-0.0279758	0.0685759	1.02051	0.972412	1.07098
ebi-a-GCST90002055	a1840n	ad	CD8 on naive CD8+ T cell	Inverse variance weighted	2	-0.0253577	0.0806733	0.753274	-0.183477	0.132762	0.974961	0.832371	1.14198
ebi-a-GCST90002056	iwU9Fg	ad	CD8 on Effector Memory CD8+ T cell	Inverse variance weighted	3	-0.00198243	0.0217683	0.927437	-0.0446482	0.0406833	0.99802	0.956334	1.04152
ebi-a-GCST90002060	jnEi12	ad	CD8 on HLA DR+ CD8+ T cell	Inverse variance weighted	2	0.0368248	0.0306004	0.228818	-0.023152	0.0968017	1.03751	0.977114	1.10164
ebi-a-GCST90002061	9eYxmj	ad	CD4 on CD39+ CD4+ T cell	Inverse variance weighted	7	0.0377833	0.0226393	0.0951318	-0.00658967	0.0821563	1.03851	0.993432	1.08563
ebi-a-GCST90002062	N84HPk	ad	CD4 on CD28+ CD4+ T cell	Inverse variance weighted	2	-0.0729898	0.0314224	0.0201867	-0.134578	-0.0114019	0.92961	0.874085	0.988663
ebi-a-GCST90002067	Mmcx0d	ad	CD4 on CD39+ activated CD4 regulatory T cell	Inverse variance weighted	4	-0.0188633	0.0233669	0.419512	-0.0646624	0.0269357	0.981313	0.937384	1.0273
ebi-a-GCST90002069	dw9EGN	ad	CD4 on CD39+ secreting CD4 regulatory T cell	Inverse variance weighted	3	0.0559008	0.0211577	0.00823945	0.0144316	0.0973699	1.05749	1.01454	1.10227
ebi-a-GCST90002071	2usnT0	ad	SSC-A on myeloid Dendritic Cell	Inverse variance weighted	4	-0.0190259	0.0366587	0.60376	-0.090877	0.0528252	0.981154	0.91313	1.05425
ebi-a-GCST90002072	hfd37q	ad	SSC-A on plasmacytoid Dendritic Cell	Inverse variance weighted	4	-0.0853897	0.0455471	0.0608266	-0.174662	0.00388273	0.918154	0.839741	1.00389
ebi-a-GCST90002073	KiodgE	ad	SSC-A on monocyte	Inverse variance weighted	10	-0.00420544	0.015364	0.784299	-0.0343188	0.025908	0.995803	0.966263	1.02625
ebi-a-GCST90002074	BSLRAj	ad	SSC-A on CD14+ monocyte	Inverse variance weighted	6	-0.000276	0.0187736	0.988286	-0.0370719	0.0365206	0.999724	0.963607	1.0372
ebi-a-GCST90002077	cOaDt5	ad	SSC-A on HLA DR+ Natural Killer	Inverse variance weighted	4	-0.0211695	0.0227041	0.351126	-0.0656696	0.0233306	0.979053	0.93644	1.0236
ebi-a-GCST90002078	BGKRWt	ad	SSC-A on granulocyte	Inverse variance weighted	2	0.0367983	0.0465001	0.428735	-0.054342	0.127939	1.03748	0.947108	1.13648
ebi-a-GCST90002081	9vgEs7	ad	SSC-A on CD4+ T cell	Inverse variance weighted	2	0.164842	0.0549822	0.00271673	0.0570768	0.272607	1.17921	1.05874	1.31338
ebi-a-GCST90002084	Y69UzP	ad	SSC-A on Natural Killer T	Inverse variance weighted	2	-0.0209987	0.050467	0.677346	-0.119914	0.0779166	0.97922	0.886997	1.08103
ebi-a-GCST90002087	99PqZf	ad	CD11c on myeloid Dendritic Cell	Inverse variance weighted	4	-0.00091	0.0453061	0.98397	-0.0897103	0.0878897	0.99909	0.914196	1.09187
ebi-a-GCST90002089	n6OfpJ	ad	CD11c on monocyte	Inverse variance weighted	2	0.0304846	0.0266413	0.252515	-0.0217323	0.0827015	1.03095	0.978502	1.08622
ebi-a-GCST90002090	DbfYmb	ad	CD11c on granulocyte	Inverse variance weighted	2	0.0464737	0.0236067	0.0489912	0.000205	0.0927428	1.04757	1.0002	1.09718
ebi-a-GCST90002098	kIvnqq	ad	CD45RA on naive CD4+ T cell	Inverse variance weighted	13	0.00986979	0.0124392	0.427519	-0.014511	0.0342506	1.00992	0.985594	1.03484
ebi-a-GCST90002099	cQKYfQ	ad	CD4RA on Terminally Differentiated CD4+ T cell	Inverse variance weighted	4	0.0224232	0.0112073	0.0454169	0.000457	0.0443895	1.02268	1.00046	1.04539
ebi-a-GCST90002100	tcKxOV	ad	CD45RA on naive CD8+ T cell	Inverse variance weighted	2	0.0423437	0.0256216	0.0984008	-0.00787463	0.092562	1.04325	0.992156	1.09698
ebi-a-GCST90002102	jVVTW2	ad	CD45RA on resting CD4 regulatory T cell	Inverse variance weighted	9	0.0161504	0.00698482	0.0207658	0.00246017	0.0298407	1.01628	1.00246	1.03029
ebi-a-GCST90002103	R5tKqF	ad	CD45RA on CD39+ resting CD4 regulatory T cell	Inverse variance weighted	2	0.0167932	0.0132096	0.203627	-0.00909764	0.0426839	1.01693	0.990944	1.04361
ebi-a-GCST90002104	8U6elL	ad	HLA DR on myeloid Dendritic Cell	Inverse variance weighted	10	-0.0725305	0.0199245	0.000272	-0.111582	-0.0334786	0.930037	0.894418	0.967076
ebi-a-GCST90002105	LcvlDq	ad	HLA DR on plasmacytoid Dendritic Cell	Inverse variance weighted	14	-0.00837264	0.0168987	0.620274	-0.041494	0.0247487	0.991662	0.959355	1.02506
ebi-a-GCST90002106	HHEXhF	ad	HLA DR on Dendritic Cell	Inverse variance weighted	11	0.0224879	0.0225861	0.319419	-0.0217809	0.0667567	1.02274	0.978455	1.06904
ebi-a-GCST90002108	10MYNa	ad	HLA DR on CD33+ HLA DR+ CD14-	Inverse variance weighted	9	-0.0141044	0.0134143	0.293056	-0.0403964	0.0121877	0.985995	0.960409	1.01226
ebi-a-GCST90002109	iXTkdl	ad	HLA DR on CD33+ HLA DR+ CD14dim	Inverse variance weighted	3	-0.040055	0.016973	0.0182788	-0.0733222	-0.00678787	0.960737	0.929301	0.993235
ebi-a-GCST90002110	Drm4aJ	ad	HLA DR on CD33dim HLA DR+ CD11b+	Inverse variance weighted	7	-0.0281855	0.0230668	0.221743	-0.0733966	0.0170255	0.972208	0.929232	1.01717
ebi-a-GCST90002111	ameh1K	ad	HLA DR on CD33dim HLA DR+ CD11b-	Inverse variance weighted	5	-0.0106363	0.031663	0.736929	-0.0726958	0.0514232	0.98942	0.929884	1.05277
ebi-a-GCST90002112	I6OL15	ad	HLA DR on CD33- HLA DR+	Inverse variance weighted	5	-0.00994785	0.0204709	0.627001	-0.0500707	0.030175	0.990101	0.951162	1.03063
ebi-a-GCST90002116	2Wy0f5	ad	HLA DR on B cell	Inverse variance weighted	10	-0.0378889	0.0188535	0.044469	-0.0748418	-0.000935943	0.96282	0.92789	0.999064
ebi-a-GCST90002117	sLwOZ8	ad	HLA DR on HLA DR+ Natural Killer	Inverse variance weighted	5	0.0266558	0.0266993	0.318099	-0.0256748	0.0789864	1.02701	0.974652	1.08219
ebi-a-GCST90002118	Wx2D2n	ad	CD8 on CD28+ CD45RA- CD8+ T cell	Inverse variance weighted	4	-0.0446715	0.0498346	0.370042	-0.142347	0.0530043	0.956312	0.86732	1.05443
ebi-a-GCST90002119	mK93wi	ad	CD8 on CD28+ CD45RA+ CD8+ T cell	Inverse variance weighted	8	0.00931173	0.0205461	0.650397	-0.0309587	0.0495821	1.00936	0.969516	1.05083
ebi-a-GCST90002120	PDlAI4	ad	CD8 on CD28- CD8+ T cell	Inverse variance weighted	3	0.0188839	0.0732599	0.796588	-0.124706	0.162473	1.01906	0.882757	1.17642
ebi-a-GCST90002121	1MXJFX	ad	CD8 on CD39+ CD8+ T cell	Inverse variance weighted	4	0.0214187	0.0560716	0.70247	-0.0884817	0.131319	1.02165	0.91532	1.14033
ebi-a-GCST90001399	Ure4zi	ad	IgD- CD27- B cell %B cell	MR Egger	3	0.0749271	0.0503376	0.376601	-0.0237347	0.173589	1.07781	0.976545	1.18957
ebi-a-GCST90001417	WXoBE0	ad	CD24+ CD27+ B cell %B cell	MR Egger	3	-0.0238608	0.518908	0.970747	-1.04092	0.993199	0.976422	0.353129	2.69986
ebi-a-GCST90001432	7MpxWk	ad	Unswitched memory B cell %lymphocyte	MR Egger	3	0.363125	0.300524	0.440127	-0.225903	0.952152	1.43781	0.797795	2.59128
ebi-a-GCST90001434	Axw6QC	ad	Switched memory B cell %lymphocyte	MR Egger	3	-0.592355	4.66281	0.919556	-9.73145	8.54674	0.553023	5.94e-05	5149.96
ebi-a-GCST90001442	erehYt	ad	CD24+ CD27+ B cell %lymphocyte	MR Egger	3	0.0635549	0.536689	0.924961	-0.988356	1.11547	1.06562	0.372188	3.05099
ebi-a-GCST90001450	lFzJXO	ad	CD62L- monocyte Absolute Count	MR Egger	4	-0.0136494	0.19267	0.949969	-0.391282	0.363983	0.986443	0.676189	1.43905
ebi-a-GCST90001451	fbksmE	ad	CD62L- monocyte %monocyte	MR Egger	3	-0.0687524	0.151044	0.728065	-0.364799	0.227294	0.933558	0.694336	1.2552
ebi-a-GCST90001458	YG2GQg	ad	Myeloid Dendritic Cell Absolute Count	MR Egger	5	0.0580029	0.0507521	0.336037	-0.0414712	0.157477	1.05972	0.959377	1.17055
ebi-a-GCST90001462	NY4XdH	ad	CD62L- Dendritic Cell Absolute Count	MR Egger	4	-0.0167806	0.0717476	0.836835	-0.157406	0.123845	0.983359	0.854357	1.13184
ebi-a-GCST90001463	qIqsZF	ad	CD62L- Dendritic Cell %Dendritic Cell	MR Egger	3	-0.0928687	0.121984	0.585748	-0.331957	0.14622	0.911313	0.717518	1.15745
ebi-a-GCST90001464	8VmkKc	ad	CD86+ myeloid Dendritic Cell Absolute Count	MR Egger	4	0.00560788	0.040355	0.902209	-0.0734879	0.0847036	1.00562	0.929147	1.08839
ebi-a-GCST90001465	3E78En	ad	CD86+ myeloid Dendritic Cell %Dendritic Cell	MR Egger	4	0.026761	0.0390802	0.564194	-0.0498362	0.103358	1.02712	0.951385	1.10889
ebi-a-GCST90001468	VomKYe	ad	CD62L- myeloid Dendritic Cell Absolute Count	MR Egger	6	0.0209109	0.036762	0.599896	-0.0511427	0.0929645	1.02113	0.950143	1.09742
ebi-a-GCST90001469	4FtSit	ad	CD62L- myeloid Dendritic Cell %Dendritic Cell	MR Egger	7	0.0367577	0.0253441	0.206656	-0.0129166	0.0864321	1.03744	0.987166	1.09028
ebi-a-GCST90001471	A1tSgF	ad	CD62L- plasmacytoid Dendritic Cell %Dendritic Cell	MR Egger	3	-0.161935	2.01109	0.948849	-4.10367	3.77979	0.850496	0.016512	43.807
ebi-a-GCST90001472	oGolpf	ad	CD62L- CD86+ myeloid Dendritic Cell Absolute Count	MR Egger	5	0.0981637	0.0493741	0.140935	0.00139039	0.194937	1.10314	1.00139	1.21523
ebi-a-GCST90001473	a8ZHVl	ad	CD62L- CD86+ myeloid Dendritic Cell %Dendritic Cell	MR Egger	6	0.0664684	0.0273847	0.0721985	0.0127943	0.120143	1.06873	1.01288	1.12766
ebi-a-GCST90001475	bdWjjD	ad	HLA DR++ monocyte %monocyte	MR Egger	3	-0.0610321	0.167768	0.77788	-0.389857	0.267793	0.940793	0.677153	1.30708
ebi-a-GCST90001480	g7H8xO	ad	Resting CD4 regulatory T cell Absolute Count	MR Egger	6	0.0180425	0.0142684	0.274707	-0.00992352	0.0460084	1.01821	0.990126	1.04708
ebi-a-GCST90001481	cgQ95v	ad	Resting CD4 regulatory T cell %CD4 regulatory T cell	MR Egger	15	0.0142448	0.00746709	0.0787677	-0.000391	0.0288803	1.01435	0.999609	1.0293
ebi-a-GCST90001482	zi7rhx	ad	Resting CD4 regulatory T cell %CD4+ T cell	MR Egger	10	0.0155184	0.00927295	0.132763	-0.00265663	0.0336934	1.01564	0.997347	1.03427
ebi-a-GCST90001483	mLpXYj	ad	CD39+ resting CD4 regulatory T cell Absolute Count	MR Egger	18	0.0225527	0.0104029	0.0455895	0.00216303	0.0429424	1.02281	1.00217	1.04388
ebi-a-GCST90001484	C4f0zM	ad	CD39+ resting CD4 regulatory T cell %resting CD4 regulatory T cell	MR Egger	15	0.0405879	0.0155688	0.0217154	0.0100731	0.0711028	1.04142	1.01012	1.07369
ebi-a-GCST90001485	Jm1uoi	ad	CD39+ resting CD4 regulatory T cell %CD4 regulatory T cell	MR Egger	22	0.0355729	0.00728471	8.99e-05	0.0212949	0.049851	1.03621	1.02152	1.05111
ebi-a-GCST90001486	uOTe3c	ad	Activated CD4 regulatory T cell Absolute Count	MR Egger	3	-0.0372987	0.0574545	0.633432	-0.149909	0.0753121	0.963388	0.860786	1.07822
ebi-a-GCST90001487	eAPiZv	ad	Activated CD4 regulatory T cell %CD4 regulatory T cell	MR Egger	5	-0.0403035	0.0278852	0.244122	-0.0949585	0.0143514	0.960498	0.909411	1.01445
ebi-a-GCST90001489	CvSRlD	ad	CD39+ activated CD4 regulatory T cell Absolute Count	MR Egger	13	0.0395672	0.0143333	0.0185394	0.0114738	0.0676605	1.04036	1.01154	1.07
ebi-a-GCST90001491	WqLxa5	ad	CD39+ activated CD4 regulatory T cell %CD4 regulatory T cell	MR Egger	12	0.0401048	0.0125612	0.00960901	0.0154849	0.0647246	1.04092	1.01561	1.06687
ebi-a-GCST90001492	H7Dc2t	ad	Secreting CD4 regulatory T cell Absolute Count	MR Egger	6	-0.0104537	0.0163851	0.55817	-0.0425686	0.0216612	0.989601	0.958325	1.0219
ebi-a-GCST90001493	1UQy5C	ad	Secreting CD4 regulatory T cell %CD4 regulatory T cell	MR Egger	11	-0.020974	0.00836976	0.0335344	-0.0373787	-0.00456923	0.979244	0.963311	0.995441
ebi-a-GCST90001494	FXLdfU	ad	Secreting CD4 regulatory T cell %CD4+ T cell	MR Egger	10	-0.0130621	0.00845867	0.161112	-0.0296411	0.0035169	0.987023	0.970794	1.00352
ebi-a-GCST90001495	ZsQiEt	ad	CD39+ secreting CD4 regulatory T cell Absolute Count	MR Egger	16	0.0315281	0.0124488	0.023909	0.0071285	0.0559276	1.03203	1.00715	1.05752
ebi-a-GCST90001496	5zt7zw	ad	CD39+ secreting CD4 regulatory T cell %secreting CD4 regulatory T cell	MR Egger	14	-0.0216722	0.0365366	0.564084	-0.0932838	0.0499395	0.978561	0.910935	1.05121
ebi-a-GCST90001497	PBUuH6	ad	CD39+ secreting CD4 regulatory T cell %CD4 regulatory T cell	MR Egger	13	-0.020384	0.0359964	0.582572	-0.0909369	0.0501688	0.979822	0.913075	1.05145
ebi-a-GCST90001499	c4hqeu	ad	Activated & resting CD4 regulatory T cell %CD4 regulatory T cell	MR Egger	11	0.0206039	0.00821529	0.0334208	0.0045019	0.0367058	1.02082	1.00451	1.03739
ebi-a-GCST90001500	lmswJj	ad	Activated & resting CD4 regulatory T cell %CD4+ T cell	MR Egger	6	0.0168217	0.0133674	0.276687	-0.00937846	0.0430219	1.01696	0.990665	1.04396
ebi-a-GCST90001501	B8bF2c	ad	Activated & secreting CD4 regulatory T cell Absolute Count	MR Egger	6	-0.00753415	0.0162586	0.667172	-0.0394009	0.0243326	0.992494	0.961365	1.02463
ebi-a-GCST90001502	RSG0Vb	ad	Activated & secreting CD4 regulatory T cell %CD4 regulatory T cell	MR Egger	15	-0.0241997	0.00730815	0.00562377	-0.0385237	-0.00987574	0.976091	0.962209	0.990173
ebi-a-GCST90001503	ZIMebt	ad	Activated & secreting CD4 regulatory T cell %CD4+ T cell	MR Egger	11	-0.0106684	0.00891588	0.262046	-0.0281435	0.00680671	0.989388	0.972249	1.00683
ebi-a-GCST90001507	o5PdKm	ad	CD25++ CD45RA+ CD4 not regulatory T cell Absolute Count	MR Egger	6	0.0254542	0.0103912	0.0704764	0.00508743	0.0458209	1.02578	1.0051	1.04689
ebi-a-GCST90001508	4yUDad	ad	CD25++ CD45RA+ CD4 not regulatory T cell %CD4+ T cell	MR Egger	9	0.0206529	0.0090542	0.05655	0.0029067	0.0383992	1.02087	1.00291	1.03915
ebi-a-GCST90001509	vamPqZ	ad	CD25++ CD45RA+ CD4 not regulatory T cell %T cell	MR Egger	8	0.0211307	0.00963654	0.0708042	0.00224308	0.0400183	1.02136	1.00225	1.04083
ebi-a-GCST90001510	YUP1j0	ad	CD25++ CD45RA- CD4 not regulatory T cell Absolute Count	MR Egger	4	-0.0143033	0.0275031	0.654859	-0.0682095	0.0396029	0.985799	0.934065	1.0404
ebi-a-GCST90001511	pdwNGn	ad	CD25++ CD45RA- CD4 not regulatory T cell %CD4+ T cell	MR Egger	6	0.00479416	0.0233628	0.847432	-0.0409969	0.0505852	1.00481	0.959832	1.05189
ebi-a-GCST90001512	37xpFN	ad	CD25++ CD45RA- CD4 not regulatory T cell %T cell	MR Egger	5	-0.0103362	0.0292921	0.747525	-0.0677487	0.0470762	0.989717	0.934495	1.0482
ebi-a-GCST90001514	60Q6a7	ad	Hematopoietic Stem Cell Absolute Count	MR Egger	3	-0.618764	0.464751	0.410112	-1.52968	0.292148	0.53861	0.216606	1.3393
ebi-a-GCST90001530	QrMnyU	ad	Monocytic Myeloid-Derived Suppressor Cells Absolute Count	MR Egger	4	0.224462	0.0570432	0.0589321	0.112658	0.336267	1.25165	1.11925	1.39971
ebi-a-GCST90001532	WwjAjA	ad	Basophil Absolute Count	MR Egger	3	-0.0107407	0.0241485	0.733574	-0.0580717	0.0365904	0.989317	0.943582	1.03727
ebi-a-GCST90001533	tpuwaW	ad	Basophil %CD33dim HLA DR- CD66b-	MR Egger	3	0.132979	0.0498395	0.228285	0.0352933	0.230664	1.14223	1.03592	1.25944
ebi-a-GCST90001535	mC0NXX	ad	CD45RA- CD4+ T cell %CD4+ T cell	MR Egger	6	-0.0356738	0.0133557	0.0557451	-0.061851	-0.00949657	0.964955	0.940023	0.990548
ebi-a-GCST90001536	OD6kJq	ad	CD45RA- CD4+ T cell %T cell	MR Egger	4	-0.0256956	0.017926	0.288138	-0.0608305	0.00943929	0.974632	0.940983	1.00948
ebi-a-GCST90001544	4XYWiY	ad	Effector Memory CD4+ T cell %T cell	MR Egger	4	-0.0423159	0.0196153	0.163685	-0.0807619	-0.0038698	0.958567	0.922413	0.996138
ebi-a-GCST90001546	vsmitp	ad	Terminally Differentiated CD4+ T cell %CD4+ T cell	MR Egger	3	0.0221181	0.0394675	0.674812	-0.0552381	0.0994744	1.02236	0.94626	1.10459
ebi-a-GCST90001547	2TwTQI	ad	Terminally Differentiated CD4+ T cell %T cell	MR Egger	4	-0.0167574	0.0340896	0.671677	-0.083573	0.0500582	0.983382	0.919824	1.05133
ebi-a-GCST90001555	LzwxTZ	ad	Effector Memory CD8+ T cell %CD8+ T cell	MR Egger	6	-0.0123128	0.0128665	0.392778	-0.0375312	0.0129056	0.987763	0.963164	1.01299
ebi-a-GCST90001558	xuadsh	ad	Terminally Differentiated CD8+ T cell %CD8+ T cell	MR Egger	5	0.0102978	0.020231	0.645819	-0.029355	0.0499506	1.01035	0.971072	1.05122
ebi-a-GCST90001560	usThBK	ad	CD45RA+ CD8+ T cell Absolute Count	MR Egger	3	-0.328222	0.9447	0.787122	-2.17983	1.52339	0.720203	0.11306	4.58775
ebi-a-GCST90001561	Z0G3iE	ad	CD45RA+ CD8+ T cell %CD8+ T cell	MR Egger	7	0.00995096	0.00880608	0.309747	-0.00730895	0.0272109	1.01	0.992718	1.02758
ebi-a-GCST90001562	fGgyZ4	ad	CD45RA+ CD8+ T cell %T cell	MR Egger	4	0.0241501	0.0213994	0.37626	-0.0177928	0.066093	1.02444	0.982365	1.06833
ebi-a-GCST90001569	TdECnO	ad	Effector Memory CD4-CD8- T cell Absolute Count	MR Egger	4	-0.0732977	0.0984474	0.534149	-0.266255	0.119659	0.929324	0.766244	1.12711
ebi-a-GCST90001570	sP6CaK	ad	Effector Memory CD4-CD8- T cell %CD4-CD8- T cell	MR Egger	4	-0.0142866	0.0194685	0.539419	-0.0524449	0.0238718	0.985815	0.948907	1.02416
ebi-a-GCST90001571	R9ufP9	ad	Effector Memory CD4-CD8- T cell %T cell	MR Egger	4	-0.0634905	0.126024	0.664419	-0.310497	0.183516	0.938483	0.733082	1.20143
ebi-a-GCST90001573	puZeuK	ad	Terminally Differentiated CD4-CD8- T cell %CD4-CD8- T cell	MR Egger	3	0.0138532	0.015311	0.531794	-0.0161563	0.0438627	1.01395	0.983974	1.04484
ebi-a-GCST90001574	rjPTCU	ad	Terminally Differentiated CD4-CD8- T cell %T cell	MR Egger	4	0.045223	0.0258195	0.221958	-0.00538315	0.0958292	1.04626	0.994631	1.10057
ebi-a-GCST90001581	JaYMBL	ad	CD14- CD16- Absolute Count	MR Egger	3	0.294248	0.179205	0.34825	-0.0569927	0.64549	1.34212	0.944601	1.90692
ebi-a-GCST90001582	zjbOyn	ad	CD14+ CD16- monocyte Absolute Count	MR Egger	3	-0.838299	0.441181	0.308411	-1.70301	0.0264158	0.432446	0.182134	1.02677
ebi-a-GCST90001592	3MO8rE	ad	CD8+ T cell Absolute Count	MR Egger	3	-1.06455	1.8005	0.66007	-4.59353	2.46444	0.344884	0.0101171	11.7569
ebi-a-GCST90001596	wKWIUN	ad	CD8dim T cell Absolute Count	MR Egger	4	0.00585865	0.0771426	0.946376	-0.145341	0.157058	1.00588	0.864727	1.17006
ebi-a-GCST90001597	Q4qTY6	ad	CD8dim T cell %T cell	MR Egger	3	-0.818126	0.543314	0.3732	-1.88302	0.246769	0.441258	0.15213	1.27988
ebi-a-GCST90001599	7sy6SK	ad	CD4-CD8- T cell %T cell	MR Egger	3	0.0291725	0.279149	0.933711	-0.517959	0.576304	1.0296	0.595735	1.77945
ebi-a-GCST90001612	fRFj0i	ad	CD8dim T cell %leukocyte	MR Egger	3	-1.34243	0.836097	0.354618	-2.98118	0.296321	0.261211	0.050733	1.3449
ebi-a-GCST90001613	nOIUPn	ad	CD4-CD8- T cell %leukocyte	MR Egger	4	-0.0763276	0.12922	0.614593	-0.329599	0.176944	0.926513	0.719212	1.19356
ebi-a-GCST90001614	RFS3VV	ad	CD8+ and CD8dim T cell %leukocyte	MR Egger	3	-0.450585	0.43503	0.48882	-1.30324	0.402074	0.637255	0.271649	1.49492
ebi-a-GCST90001618	yLtqVh	ad	HLA DR+ T cell Absolute Count	MR Egger	4	-0.0712824	0.0637355	0.379698	-0.196204	0.0536391	0.931199	0.821845	1.0551
ebi-a-GCST90001619	OT2s1U	ad	HLA DR+ T cell%T cell	MR Egger	3	-0.0541327	0.0349481	0.364959	-0.122631	0.0143656	0.947306	0.88459	1.01447
ebi-a-GCST90001620	XPhmnP	ad	HLA DR+ T cell%lymphocyte	MR Egger	4	-0.0550552	0.0390901	0.294346	-0.131672	0.0215613	0.946433	0.876629	1.0218
ebi-a-GCST90001621	SkfGaX	ad	Natural Killer T Absolute Count	MR Egger	6	-0.0863947	0.0697283	0.283073	-0.223062	0.0502727	0.917232	0.800065	1.05156
ebi-a-GCST90001622	taPnxW	ad	Natural Killer T %T cell	MR Egger	7	-0.0500239	0.0461109	0.327499	-0.140401	0.0403535	0.951207	0.869009	1.04118
ebi-a-GCST90001623	TyWwZb	ad	Natural Killer T %lymphocyte	MR Egger	8	-0.0133826	0.0454003	0.778103	-0.102367	0.0756019	0.986707	0.902698	1.07853
ebi-a-GCST90001627	FvjD0X	ad	HLA DR+ CD8+ T cell Absolute Count	MR Egger	3	-0.0774795	0.0987458	0.576455	-0.271021	0.116062	0.925446	0.7626	1.12307
ebi-a-GCST90001628	CZnCbS	ad	HLA DR+ CD8+ T cell %T cell	MR Egger	3	-0.0686522	0.0844178	0.565339	-0.234111	0.0968067	0.933651	0.791274	1.10165
ebi-a-GCST90001633	WMki1I	ad	CD8dim Natural Killer T Absolute Count	MR Egger	7	0.0119017	0.0403981	0.780131	-0.0672785	0.0910819	1.01197	0.934935	1.09536
ebi-a-GCST90001634	c5ihPF	ad	CD8dim Natural Killer T %T cell	MR Egger	7	0.00488865	0.0354959	0.895833	-0.0646833	0.0744606	1.0049	0.937364	1.0773
ebi-a-GCST90001635	Qz4jAp	ad	CD8dim Natural Killer T %lymphocyte	MR Egger	8	0.00704816	0.0338174	0.841797	-0.0592339	0.0733302	1.00707	0.942486	1.07609
ebi-a-GCST90001637	SkjLbo	ad	CD4-CD8- Natural Killer T %T cell	MR Egger	8	0.058739	0.0607343	0.370821	-0.0603003	0.177778	1.0605	0.941482	1.19456
ebi-a-GCST90001638	iZokvF	ad	CD4-CD8- Natural Killer T %lymphocyte	MR Egger	8	0.0241474	0.038887	0.557462	-0.0520712	0.100366	1.02444	0.949261	1.10558
ebi-a-GCST90001643	sX3IRp	ad	B cell %CD3- lymphocyte	MR Egger	3	0.00820477	0.0237846	0.788528	-0.0384131	0.0548226	1.00824	0.962315	1.05635
ebi-a-GCST90001645	i9oIQ2	ad	Natural Killer Absolute Count	MR Egger	3	-0.161089	0.201289	0.570334	-0.555615	0.233437	0.851216	0.573719	1.26293
ebi-a-GCST90001646	UwptDb	ad	Natural Killer %CD3- lymphocyte	MR Egger	5	-0.00551188	0.0221773	0.819761	-0.0489794	0.0379556	0.994503	0.952201	1.03869
ebi-a-GCST90001647	zL0NOo	ad	Natural Killer %lymphocyte	MR Egger	3	-0.217491	0.218847	0.501978	-0.646432	0.211449	0.804534	0.523912	1.23547
ebi-a-GCST90001648	9hUFdp	ad	HLA DR+ Natural Killer Absolute Count	MR Egger	3	-0.0522702	0.0386293	0.405172	-0.127984	0.0234431	0.949072	0.879868	1.02372
ebi-a-GCST90001649	yQSMZ4	ad	HLA DR+ Natural Killer %Natural Killer	MR Egger	5	-0.0460131	0.0248949	0.161698	-0.094807	0.00278089	0.955029	0.909548	1.00278
ebi-a-GCST90001650	tyeslR	ad	HLA DR+ Natural Killer %CD3- lymphocyte	MR Egger	4	-0.0629034	0.036904	0.2304	-0.135235	0.00942842	0.939034	0.87351	1.00947
ebi-a-GCST90001658	Krwzz5	ad	CD39+ CD4+ T cell %T cell	MR Egger	17	-0.0193437	0.0297212	0.524997	-0.0775972	0.0389099	0.980842	0.925337	1.03968
ebi-a-GCST90001659	BKpbIM	ad	CD39+ CD4+ T cell %CD4+ T cell	MR Egger	15	0.0229282	0.0367416	0.543398	-0.0490854	0.0949418	1.02319	0.9521	1.09959
ebi-a-GCST90001660	pP5Dcn	ad	CD39+ CD4+ T cell Absolute Count	MR Egger	17	0.0129077	0.0395193	0.748471	-0.0645502	0.0903655	1.01299	0.937489	1.09457
ebi-a-GCST90001661	ZNm3YD	ad	CD28- CD8dim T cell %T cell	MR Egger	3	-0.0804706	0.0935992	0.547924	-0.263925	0.102984	0.922682	0.768031	1.10847
ebi-a-GCST90001664	yhX3Ox	ad	CD28+ CD45RA+ CD8dim T cell %T cell	MR Egger	8	0.0253613	0.0169948	0.186225	-0.00794859	0.0586712	1.02569	0.992083	1.06043
ebi-a-GCST90001665	wSlFn2	ad	CD28+ CD45RA+ CD8dim T cell %CD8dim T cell	MR Egger	7	0.0225777	0.0107194	0.0890454	0.00156762	0.0435877	1.02283	1.00157	1.04455
ebi-a-GCST90001666	H2AkZd	ad	CD28+ CD45RA+ CD8dim T cell Absolute Count	MR Egger	8	0.00863532	0.00744585	0.290211	-0.00595854	0.0232292	1.00867	0.994059	1.0235
ebi-a-GCST90001667	EslJm1	ad	CD28+ CD45RA- CD8dim T cell %T cell	MR Egger	4	-0.0116591	0.0313932	0.746001	-0.0731898	0.0498716	0.988409	0.929424	1.05114
ebi-a-GCST90001668	StXSda	ad	CD28+ CD45RA- CD8dim T cell %CD8dim T cell	MR Egger	3	-0.014125	0.0517805	0.830464	-0.115615	0.0873648	0.985974	0.890818	1.09129
ebi-a-GCST90001669	Q0WfNi	ad	CD28+ CD45RA- CD8dim T cell Absolute Count	MR Egger	4	0.00507798	0.0323518	0.889689	-0.0583315	0.0684875	1.00509	0.943337	1.07089
ebi-a-GCST90001670	UavKZX	ad	CD39+ CD8+ T cell %T cell	MR Egger	20	-0.00110965	0.0297193	0.970627	-0.0593595	0.0571402	0.998891	0.942368	1.0588
ebi-a-GCST90001671	ExZWJp	ad	CD39+ CD8+ T cell %CD8+ T cell	MR Egger	16	0.0168264	0.0353127	0.641071	-0.0523865	0.0860393	1.01697	0.948962	1.08985
ebi-a-GCST90001672	lHSzKD	ad	CD39+ CD8+ T cell Absolute Count	MR Egger	21	0.0090452	0.0326509	0.78475	-0.0549505	0.0730409	1.00909	0.946532	1.07577
ebi-a-GCST90001681	EvJJ4d	ad	CD25++ CD8+ T cell Absolute Count	MR Egger	3	0.0338388	0.0440362	0.582892	-0.0524722	0.12015	1.03442	0.948881	1.12767
ebi-a-GCST90001686	KoHNTO	ad	CD28- CD8+ T cell %CD8+ T cell	MR Egger	4	-0.17753	0.186693	0.44201	-0.543448	0.188388	0.837336	0.580742	1.2073
ebi-a-GCST90001687	IGqHSv	ad	CD28- CD8+ T cell Absolute Count	MR Egger	3	1.40865	2.31729	0.65228	-3.13325	5.95054	4.09042	0.0435761	383.96
ebi-a-GCST90001688	MFiGXg	ad	CD28+ CD45RA+ CD8+ T cell %T cell	MR Egger	33	0.00454186	0.00304087	0.145388	-0.00141824	0.010502	1.00455	0.998583	1.01056
ebi-a-GCST90001691	op7QIN	ad	CD28+ CD45RA- CD8+ T cell %T cell	MR Egger	6	0.0251894	0.0254565	0.37843	-0.0247054	0.0750841	1.02551	0.975597	1.07797
ebi-a-GCST90001692	L2jPqP	ad	CD28+ CD45RA- CD8+ T cell %CD8+ T cell	MR Egger	6	-0.0278881	0.0115168	0.0726435	-0.050461	-0.00531524	0.972497	0.950791	0.994699
ebi-a-GCST90001693	OH9M7q	ad	CD28+ CD45RA- CD8+ T cell Absolute Count	MR Egger	4	0.009866	0.0230617	0.710452	-0.035335	0.055067	1.00991	0.965282	1.05661
ebi-a-GCST90001694	Ri4C9R	ad	CD28- CD4-CD8- T cell %T cell	MR Egger	3	-0.291166	0.139609	0.284632	-0.564799	-0.0175326	0.747392	0.568474	0.98262
ebi-a-GCST90001695	Ghux4b	ad	CD45RA- CD28- CD8+ T cell Absolute Count	MR Egger	131	8.48e-06	8.72e-06	0.33292	-8.62e-06	2.56e-05	1.00001	0.999991	1.00003
ebi-a-GCST90001696	aau4wS	ad	CD45RA- CD28- CD8+ T cell %CD8+ T cell	MR Egger	11	0.000524	0.000513	0.333957	-0.000482	0.00153014	1.00052	0.999518	1.00153
ebi-a-GCST90001697	wvoDUT	ad	CD45RA- CD28- CD8+ T cell %T cell	MR Egger	36	0.000896	0.000337	0.0119848	0.000234	0.00155722	1.0009	1.00023	1.00156
ebi-a-GCST90001698	NK6OFS	ad	CD45RA+ CD28- CD8+ T cell Absolute Count	MR Egger	540	-6.28e-07	3.51e-06	0.858085	-7.51e-06	6.26e-06	0.999999	0.999992	1.00001
ebi-a-GCST90001700	RLghpz	ad	CD45RA+ CD28- CD8+ T cell %T cell	MR Egger	69	0.000135	0.000192	0.483706	-0.000241	0.000512	1.00014	0.999759	1.00051
ebi-a-GCST90001702	UyR7CG	ad	BAFF-R on CD24+ CD27+ B cell	MR Egger	22	-0.00661115	0.013228	0.622682	-0.0325381	0.0193158	0.993411	0.967986	1.0195
ebi-a-GCST90001703	sTEWnR	ad	BAFF-R on IgD+ CD24+ B cell	MR Egger	18	-0.00341845	0.0140769	0.811214	-0.0310091	0.0241722	0.996587	0.969467	1.02447
ebi-a-GCST90001704	g2OkhP	ad	BAFF-R on IgD+ CD24- B cell	MR Egger	25	-0.00511502	0.0119307	0.67211	-0.0284992	0.0182692	0.994898	0.971903	1.01844
ebi-a-GCST90001705	MGSGAo	ad	BAFF-R on IgD+ CD38- B cell	MR Egger	19	-0.0135096	0.0136954	0.337756	-0.0403526	0.0133335	0.986581	0.960451	1.01342
ebi-a-GCST90001706	Vumo5g	ad	BAFF-R on IgD+ CD38- naive B cell	MR Egger	12	-0.0107431	0.0312039	0.737762	-0.0719028	0.0504167	0.989314	0.930621	1.05171
ebi-a-GCST90001707	IDCSt9	ad	BAFF-R on IgD+ CD38- unswitched memory B cell	MR Egger	14	0.00262961	0.019005	0.892247	-0.0346202	0.0398794	1.00263	0.965972	1.04069
ebi-a-GCST90001708	OSYpbN	ad	BAFF-R on IgD+ CD38+ B cell	MR Egger	22	0.00306829	0.0130914	0.817077	-0.0225909	0.0287274	1.00307	0.977662	1.02914
ebi-a-GCST90001709	4TXFZz	ad	BAFF-R on IgD+ CD38dim B cell	MR Egger	26	-0.00252183	0.0115065	0.828374	-0.0250745	0.0200309	0.997481	0.975237	1.02023
ebi-a-GCST90001710	GZ1QSI	ad	BAFF-R on IgD- CD24- B cell	MR Egger	21	-0.000328	0.0131097	0.98031	-0.0260229	0.0253672	0.999672	0.974313	1.02569
ebi-a-GCST90001711	rO181c	ad	BAFF-R on IgD- CD27- B cell	MR Egger	22	-0.00109938	0.0126425	0.931569	-0.0258787	0.02368	0.998901	0.974453	1.02396
ebi-a-GCST90001712	pTTNJ3	ad	BAFF-R on IgD- CD38- B cell	MR Egger	23	-0.0147002	0.0141318	0.310064	-0.0423985	0.012998	0.985407	0.958488	1.01308
ebi-a-GCST90001713	qvPMAY	ad	BAFF-R on IgD- CD38+ B cell	MR Egger	3	0.001745	0.0444688	0.975031	-0.0854138	0.0889038	1.00175	0.918132	1.09298
ebi-a-GCST90001715	Rgbbut	ad	BAFF-R on memory B cell	MR Egger	19	-0.00968578	0.0137138	0.489582	-0.0365648	0.0171933	0.990361	0.964096	1.01734
ebi-a-GCST90001716	WmlwfO	ad	BAFF-R on naive-mature B cell	MR Egger	25	-0.00484849	0.012278	0.696561	-0.0289134	0.0192164	0.995163	0.971501	1.0194
ebi-a-GCST90001717	oG6epC	ad	BAFF-R on unswitched memory B cell	MR Egger	19	-0.0101645	0.0131179	0.449066	-0.0358756	0.0155466	0.989887	0.96476	1.01567
ebi-a-GCST90001718	ArmzsW	ad	BAFF-R on switched memory B cell	MR Egger	23	-0.00576734	0.0130794	0.663758	-0.031403	0.0198684	0.994249	0.969085	1.02007
ebi-a-GCST90001719	hizsJo	ad	BAFF-R on IgD+ B cell	MR Egger	25	-0.00486374	0.0118942	0.686383	-0.0281763	0.0184488	0.995148	0.972217	1.01862
ebi-a-GCST90001720	UkK0i7	ad	BAFF-R on transitional B cell	MR Egger	17	-0.00549217	0.0201501	0.788905	-0.0449863	0.034002	0.994523	0.956011	1.03459
ebi-a-GCST90001724	rcSXY5	ad	CD19 on IgD+ CD24+ B cell	MR Egger	3	-0.0549736	0.0642167	0.549271	-0.180838	0.0708911	0.94651	0.83457	1.07346
ebi-a-GCST90001725	mbMbrU	ad	CD19 on IgD+ CD24- B cell	MR Egger	3	-0.057232	0.131119	0.737992	-0.314226	0.199762	0.944375	0.730354	1.22111
ebi-a-GCST90001728	ra8uOq	ad	CD19 on IgD+ CD38- unswitched memory B cell	MR Egger	3	-0.26198	0.444766	0.661119	-1.13372	0.609763	0.769527	0.321833	1.83999
ebi-a-GCST90001729	XSC2g4	ad	CD19 on IgD+ CD38+ B cell	MR Egger	5	-0.0456512	0.117043	0.722552	-0.275055	0.183753	0.955375	0.75953	1.20172
ebi-a-GCST90001730	ksHgIT	ad	CD19 on IgD+ CD38dim B cell	MR Egger	3	-0.12109	0.902355	0.915077	-1.88971	1.64753	0.885954	0.151116	5.19412
ebi-a-GCST90001738	DC0cEY	ad	CD19 on unswitched memory B cell	MR Egger	3	-0.334997	0.661052	0.701397	-1.63066	0.960665	0.71534	0.195801	2.61343
ebi-a-GCST90001742	lYtTiw	ad	CD19 on transitional B cell	MR Egger	3	0.433091	1.05504	0.752022	-1.63478	2.50097	1.54202	0.194994	12.1943
ebi-a-GCST90001743	DyL8uW	ad	CD20 on B cell	MR Egger	3	0.204156	0.594145	0.789296	-0.960369	1.36868	1.22649	0.382751	3.93016
ebi-a-GCST90001745	LFPYca	ad	CD20 on CD24+ CD27+ B cell	MR Egger	4	0.0707874	0.122067	0.620602	-0.168463	0.310038	1.07335	0.844962	1.36348
ebi-a-GCST90001747	125171	ad	CD20 on IgD+ CD24- B cell	MR Egger	3	0.26156	0.218474	0.443013	-0.16665	0.68977	1.29895	0.846496	1.99326
ebi-a-GCST90001748	oIdGqK	ad	CD20 on IgD+ CD38- B cell	MR Egger	3	0.250867	0.180154	0.396479	-0.102235	0.603969	1.28514	0.902817	1.82936
ebi-a-GCST90001751	9v3Tyv	ad	CD20 on IgD+ CD38+ B cell	MR Egger	4	0.0939415	0.0695895	0.309523	-0.042454	0.230337	1.0985	0.958435	1.25902
ebi-a-GCST90001752	Jr80cm	ad	CD20 on IgD+ CD38dim B cell	MR Egger	5	0.0516597	0.103488	0.651958	-0.151177	0.254496	1.05302	0.859696	1.28981
ebi-a-GCST90001754	xiOVII	ad	CD20 on IgD- CD27- B cell	MR Egger	4	-0.335397	0.544721	0.600812	-1.40305	0.732257	0.715054	0.245846	2.07977
ebi-a-GCST90001755	tl4mFu	ad	CD20 on IgD- CD38- B cell	MR Egger	4	0.349675	0.411869	0.485296	-0.457588	1.15694	1.41861	0.632808	3.18018
ebi-a-GCST90001757	HdFOLd	ad	CD20 on IgD- CD38dim B cell	MR Egger	7	-0.0819138	0.114001	0.504592	-0.305355	0.141527	0.921351	0.736862	1.15203
ebi-a-GCST90001758	44y7VH	ad	CD20 on memory B cell	MR Egger	3	-0.184181	0.802075	0.856304	-1.75625	1.38789	0.831785	0.172692	4.00637
ebi-a-GCST90001759	sDvfYS	ad	CD20 on naive-mature B cell	MR Egger	3	-0.0904706	0.194296	0.722575	-0.471291	0.29035	0.913501	0.624196	1.33689
ebi-a-GCST90001760	zuPhrD	ad	CD20 on unswitched memory B cell	MR Egger	4	0.100087	0.676274	0.895919	-1.22541	1.42558	1.10527	0.293637	4.16029
ebi-a-GCST90001761	IxX3Yk	ad	CD20 on switched memory B cell	MR Egger	7	-0.0848684	0.108786	0.470606	-0.298088	0.128351	0.918633	0.742236	1.13695
ebi-a-GCST90001762	E9pG3r	ad	CD20 on IgD+ B cell	MR Egger	3	0.119884	0.184908	0.633809	-0.242536	0.482305	1.12737	0.784635	1.6198
ebi-a-GCST90001765	9pictr	ad	CD24 on IgD+ CD24+ B cell	MR Egger	3	-0.0408789	0.0300695	0.403748	-0.0998152	0.0180574	0.959945	0.905005	1.01822
ebi-a-GCST90001771	Wku3IT	ad	CD24 on memory B cell	MR Egger	3	-0.0377518	0.0327102	0.454527	-0.101864	0.0263602	0.962952	0.903152	1.02671
ebi-a-GCST90001775	Shf4sD	ad	CD25 on B cell	MR Egger	3	-0.0328051	0.0564004	0.664619	-0.14335	0.0777396	0.967727	0.866451	1.08084
ebi-a-GCST90001777	pVErsF	ad	CD25 on CD24+ CD27+ B cell	MR Egger	3	-0.0155347	0.0784589	0.87556	-0.169314	0.138245	0.984585	0.844244	1.14826
ebi-a-GCST90001779	Z24Y33	ad	CD25 on IgD+ CD24- B cell	MR Egger	4	-0.0215003	0.0478519	0.697205	-0.11529	0.0722894	0.978729	0.891108	1.07497
ebi-a-GCST90001784	RHDFjB	ad	CD25 on IgD+ CD38dim B cell	MR Egger	3	0.0290679	0.0816676	0.78231	-0.131001	0.189136	1.02949	0.877217	1.20821
ebi-a-GCST90001787	CD8zrZ	ad	CD25 on IgD- CD38- B cell	MR Egger	3	0.0793414	0.0801687	0.503302	-0.0777893	0.236472	1.08257	0.925159	1.26677
ebi-a-GCST90001789	7UNlHL	ad	CD25 on IgD- CD38dim B cell	MR Egger	3	-0.0404197	0.0490462	0.561196	-0.13655	0.0557109	0.960386	0.872362	1.05729
ebi-a-GCST90001790	iyyyfx	ad	CD25 on memory B cell	MR Egger	3	-0.0165294	0.0801768	0.870567	-0.173676	0.140617	0.983606	0.840569	1.15098
ebi-a-GCST90001791	JcCvBn	ad	CD25 on naive-mature B cell	MR Egger	4	-0.0294168	0.0503156	0.617953	-0.128035	0.0692019	0.971012	0.879822	1.07165
ebi-a-GCST90001792	0whGPu	ad	CD25 on unswitched memory B cell	MR Egger	3	-0.0236312	0.0807098	0.818671	-0.181822	0.13456	0.976646	0.833749	1.14403
ebi-a-GCST90001798	YdA0Qm	ad	CD27 on CD24+ CD27+ B cell	MR Egger	11	-0.0152083	0.0334941	0.660538	-0.0808568	0.0504402	0.984907	0.922326	1.05173
ebi-a-GCST90001800	SisK8F	ad	CD27 on IgD+ CD24+ B cell	MR Egger	7	-0.0741941	0.0427918	0.14348	-0.158066	0.00967797	0.928491	0.853793	1.00972
ebi-a-GCST90001801	zJJZ7T	ad	CD27 on IgD+ CD38- unswitched memory B cell	MR Egger	4	-0.0878911	0.0350042	0.128699	-0.156499	-0.0192829	0.915861	0.855132	0.980902
ebi-a-GCST90001802	rwzTLV	ad	CD27 on IgD- CD38- B cell	MR Egger	7	-0.0225308	0.0393105	0.591356	-0.0995794	0.0545178	0.977721	0.905218	1.05603
ebi-a-GCST90001804	1Vq6c5	ad	CD27 on IgD- CD38dim B cell	MR Egger	9	-0.0192856	0.0352046	0.600843	-0.0882866	0.0497155	0.980899	0.915498	1.05097
ebi-a-GCST90001805	6XfMp6	ad	CD27 on memory B cell	MR Egger	8	-0.0765575	0.0349593	0.0710844	-0.145078	-0.00803721	0.9263	0.864955	0.991995
ebi-a-GCST90001806	xVsu9U	ad	CD27 on unswitched memory B cell	MR Egger	10	-0.00859254	0.0393469	0.832602	-0.0857124	0.0685274	0.991444	0.917858	1.07093
ebi-a-GCST90001808	mulhyR	ad	CD27 on switched memory B cell	MR Egger	10	-0.0179745	0.0397302	0.662986	-0.0958458	0.0598967	0.982186	0.908604	1.06173
ebi-a-GCST90001813	2dwq4s	ad	CD38 on IgD+ CD38dim B cell	MR Egger	4	-0.0347287	0.0482582	0.546477	-0.129315	0.0598574	0.965867	0.878697	1.06169
ebi-a-GCST90001815	hOt64P	ad	CD38 on IgD- CD38dim B cell	MR Egger	4	-0.0416267	0.0479826	0.477105	-0.135673	0.0524193	0.959228	0.873128	1.05382
ebi-a-GCST90001816	sDiMPv	ad	CD38 on naive-mature B cell	MR Egger	4	-0.0439531	0.0554452	0.511035	-0.152626	0.0647195	0.956999	0.858451	1.06686
ebi-a-GCST90001819	1aqFBG	ad	CD38 on transitional B cell	MR Egger	5	0.019563	0.032494	0.589601	-0.0441253	0.0832513	1.01976	0.956834	1.08681
ebi-a-GCST90001820	4SOoW3	ad	IgD on IgD+ CD24+ B cell	MR Egger	6	0.340266	0.254271	0.251836	-0.158105	0.838636	1.40532	0.853761	2.31321
ebi-a-GCST90001821	jyTpWf	ad	IgD on IgD+ CD24- B cell	MR Egger	3	-0.0571969	0.23051	0.845162	-0.508996	0.394603	0.944408	0.601099	1.48379
ebi-a-GCST90001825	lSRUwW	ad	IgD on IgD+ CD38dim B cell	MR Egger	3	-0.047314	0.196535	0.849602	-0.432522	0.337894	0.953788	0.64887	1.40199
ebi-a-GCST90001826	EKyMwD	ad	IgD on unswitched memory B cell	MR Egger	6	0.588562	0.363998	0.181198	-0.124873	1.302	1.8014	0.882609	3.67663
ebi-a-GCST90001828	zyLT6t	ad	IgD on transitional B cell	MR Egger	3	0.235772	0.213051	0.4678	-0.181808	0.653353	1.26589	0.833761	1.92197
ebi-a-GCST90001829	3zttjK	ad	BAFF-R on B cell	MR Egger	21	-0.00584937	0.0130959	0.660171	-0.0315173	0.0198185	0.994168	0.968974	1.02002
ebi-a-GCST90001838	sigCzA	ad	CD3 on naive CD8+ T cell	MR Egger	8	0.0508018	0.0407262	0.25873	-0.0290214	0.130625	1.05211	0.971396	1.13954
ebi-a-GCST90001839	HWkBXe	ad	CD3 on Effector Memory CD8+ T cell	MR Egger	3	0.00259557	0.12373	0.986647	-0.239914	0.245106	1.0026	0.786695	1.27776
ebi-a-GCST90001841	1992Pl	ad	CD3 on Central Memory CD4+ T cell	MR Egger	5	0.126953	0.0393888	0.0484707	0.0497508	0.204155	1.13536	1.05101	1.22649
ebi-a-GCST90001842	5j1tK6	ad	CD3 on Naive CD4+ T cell	MR Egger	6	0.0427437	0.0298977	0.226033	-0.0158559	0.101343	1.04367	0.984269	1.10666
ebi-a-GCST90001845	r5XEfg	ad	CD3 on CD45RA- CD4+ T cell	MR Egger	4	0.159033	0.0827928	0.194713	-0.00324047	0.321307	1.17238	0.996765	1.37893
ebi-a-GCST90001846	jE5yV2	ad	CD3 on Central Memory CD8+ T cell	MR Egger	4	0.0772297	0.0901148	0.481736	-0.0993952	0.253855	1.08029	0.905385	1.28898
ebi-a-GCST90001851	NJLPtH	ad	CD3 on T cell	MR Egger	3	-0.125583	0.387886	0.800666	-0.88584	0.634673	0.881982	0.412368	1.88641
ebi-a-GCST90001853	ZOK01v	ad	CD3 on activated CD4 regulatory T cell	MR Egger	6	0.0198799	0.0223575	0.424149	-0.0239408	0.0637005	1.02008	0.976343	1.06577
ebi-a-GCST90001854	IJXpij	ad	CD3 on CD39+ activated CD4 regulatory T cell	MR Egger	6	0.0416203	0.0271753	0.200392	-0.0116433	0.0948839	1.0425	0.988424	1.09953
ebi-a-GCST90001855	Lik0Gb	ad	CD3 on secreting CD4 regulatory T cell	MR Egger	4	0.037272	0.0518108	0.546606	-0.0642772	0.138821	1.03798	0.937745	1.14892
ebi-a-GCST90001856	5AfbTE	ad	CD3 on CD39+ secreting CD4 regulatory T cell	MR Egger	5	0.0394554	0.0488532	0.478401	-0.0562969	0.135208	1.04024	0.945258	1.14477
ebi-a-GCST90001857	Ldoexc	ad	CD3 on activated & secreting CD4 regulatory T cell	MR Egger	6	0.0339389	0.0227686	0.210324	-0.0106877	0.0785654	1.03452	0.989369	1.08173
ebi-a-GCST90001858	gIrbgk	ad	CD3 on CD45RA+ CD4+ T cell	MR Egger	8	0.0194939	0.0320305	0.5651	-0.0432858	0.0822736	1.01969	0.957638	1.08575
ebi-a-GCST90001859	qiAGRL	ad	CD3 on CD8+ T cell	MR Egger	3	0.0559534	0.0786868	0.606486	-0.0982727	0.21018	1.05755	0.906402	1.2339
ebi-a-GCST90001860	SiaogK	ad	CD3 on CD39+ CD4+ T cell	MR Egger	5	0.0305293	0.0214014	0.248984	-0.0114175	0.0724762	1.031	0.988647	1.07517
ebi-a-GCST90001861	zJI4Wu	ad	CD3 on CD28+ CD4+ T cell	MR Egger	3	0.333821	0.253071	0.412955	-0.162199	0.82984	1.39629	0.850272	2.29295
ebi-a-GCST90001863	AlFkgi	ad	CD3 on CD28+ CD45RA- CD8+ T cell	MR Egger	5	0.0459227	0.0453411	0.385732	-0.0429458	0.134791	1.04699	0.957963	1.1443
ebi-a-GCST90001864	YzQcl2	ad	CD3 on CD28+ CD45RA+ CD8+ T cell	MR Egger	7	0.0779318	0.0267865	0.0334242	0.0254303	0.130433	1.08105	1.02576	1.13932
ebi-a-GCST90001867	r5hrIY	ad	CD3 on CD4+ T cell	MR Egger	3	0.0523331	0.0964006	0.683375	-0.136612	0.241278	1.05373	0.872309	1.27288
ebi-a-GCST90001868	JJXyZv	ad	CD3 on CD4 regulatory T cell	MR Egger	5	0.020216	0.0280262	0.522843	-0.0347153	0.0751474	1.02042	0.96588	1.07804
ebi-a-GCST90001869	WbXu6p	ad	CD3 on resting CD4 regulatory T cell	MR Egger	7	-0.0315987	0.0261383	0.280743	-0.0828299	0.0196324	0.968895	0.920508	1.01983
ebi-a-GCST90001870	aq3DI1	ad	CD34 on Hematopoietic Stem Cell	MR Egger	4	0.235415	0.187887	0.336855	-0.132844	0.603673	1.26543	0.875602	1.82882
ebi-a-GCST90001883	DrHRbu	ad	CD16-CD56 on Natural Killer T	MR Egger	7	0.0534916	0.0601942	0.414892	-0.064489	0.171472	1.05495	0.937546	1.18705
ebi-a-GCST90001884	uH5Eyv	ad	CD16-CD56 on Natural Killer	MR Egger	9	0.0189944	0.0257934	0.485424	-0.0315606	0.0695494	1.01918	0.968932	1.07203
ebi-a-GCST90001886	erpCXO	ad	CD28 on CD39+ activated CD4 regulatory T cell	MR Egger	3	0.00660941	0.190369	0.977906	-0.366514	0.379733	1.00663	0.693146	1.46189
ebi-a-GCST90001887	vM22Za	ad	CD28 on secreting CD4 regulatory T cell	MR Egger	4	-0.0779353	0.0760726	0.41334	-0.227038	0.071167	0.925024	0.796891	1.07376
ebi-a-GCST90001891	5uRLx9	ad	CD28 on CD45RA- CD4 not regulatory T cell	MR Egger	3	-0.0359761	0.0565487	0.639284	-0.146811	0.0748592	0.964663	0.863457	1.07773
ebi-a-GCST90001892	D3LvOB	ad	CD28 on CD39+ CD4+ T cell	MR Egger	8	0.0459504	0.0371881	0.262781	-0.0269384	0.118839	1.04702	0.973421	1.12619
ebi-a-GCST90001894	8ML4BV	ad	CD28 on CD28+ CD4+ T cell	MR Egger	3	-0.0454301	0.141312	0.801978	-0.322401	0.231541	0.955586	0.724407	1.26054
ebi-a-GCST90001898	OHx3fW	ad	CD28 on CD4+ T cell	MR Egger	3	-0.0612454	0.152473	0.756841	-0.360093	0.237602	0.940592	0.697611	1.2682
ebi-a-GCST90001907	j4dGKn	ad	CCR7 on naive CD4+ T cell	MR Egger	4	-0.0556433	0.07415	0.531277	-0.200977	0.0896908	0.945877	0.817931	1.09384
ebi-a-GCST90001926	iDhplJ	ad	CD127 on granulocyte	MR Egger	8	-0.0910893	0.038459	0.0556363	-0.166469	-0.0157096	0.912936	0.846649	0.984413
ebi-a-GCST90001932	kMnbXz	ad	CD127 on CD45RA+ CD4+ T cell	MR Egger	4	-0.176905	0.379812	0.687181	-0.921336	0.567527	0.83786	0.397987	1.7639
ebi-a-GCST90001946	VGlAAY	ad	CD33 on CD14+ monocyte	MR Egger	8	0.0349008	0.0119192	0.0263511	0.0115393	0.0582624	1.03552	1.01161	1.05999
ebi-a-GCST90001947	UEHLz0	ad	CD33 on CD33+ HLA DR+ CD14dim	MR Egger	6	0.0344926	0.0118086	0.0432012	0.0113478	0.0576375	1.03509	1.01141	1.05933
ebi-a-GCST90001948	0pUxFy	ad	CD33 on CD33dim HLA DR+ CD11b+	MR Egger	7	0.0382699	0.0116812	0.0220469	0.0153748	0.061165	1.03901	1.01549	1.06307
ebi-a-GCST90001949	5td6iy	ad	CD33 on CD33dim HLA DR+ CD11b-	MR Egger	7	0.0458897	0.0126488	0.0150926	0.021098	0.0706815	1.04696	1.02132	1.07324
ebi-a-GCST90001950	MjVxTn	ad	CD33 on Granulocytic Myeloid-Derived Suppressor Cells	MR Egger	3	0.0471666	0.0200837	0.256272	0.00780247	0.0865307	1.0483	1.00783	1.09038
ebi-a-GCST90001951	RCNrSy	ad	CD33 on CD66b++ myeloid cell	MR Egger	6	0.0522088	0.0156172	0.0287547	0.021599	0.0828185	1.0536	1.02183	1.08634
ebi-a-GCST90001952	horFa4	ad	CD33 on Monocytic Myeloid-Derived Suppressor Cells	MR Egger	4	0.0378501	0.0129316	0.0995941	0.0125041	0.0631961	1.03858	1.01258	1.06524
ebi-a-GCST90001953	lWHSCu	ad	CD33 on CD33dim HLA DR-	MR Egger	5	0.0413129	0.0146698	0.0669491	0.0125601	0.0700657	1.04218	1.01264	1.07258
ebi-a-GCST90001954	dcPQXI	ad	CD33 on basophil	MR Egger	8	0.0389503	0.013367	0.026843	0.012751	0.0651496	1.03972	1.01283	1.06732
ebi-a-GCST90001955	gjui1T	ad	CD33 on Immature Myeloid-Derived Suppressor Cells	MR Egger	6	0.0406553	0.0145823	0.0494133	0.012074	0.0692366	1.04149	1.01215	1.07169
ebi-a-GCST90001956	WhwnGC	ad	CD33 on CD33+ HLA DR+	MR Egger	5	0.0367508	0.0120743	0.0557033	0.0130852	0.0604165	1.03743	1.01317	1.06228
ebi-a-GCST90001957	SvpGGr	ad	CD33 on CD33+ HLA DR+ CD14-	MR Egger	5	0.0366715	0.0120371	0.055579	0.0130789	0.0602642	1.03735	1.01316	1.06212
ebi-a-GCST90001961	z1wfSc	ad	CD25 on CD39+ CD4+ T cell	MR Egger	9	-0.0794159	0.0316631	0.0405064	-0.141476	-0.0173561	0.923656	0.868076	0.982794
ebi-a-GCST90001963	3PbSJY	ad	FSC-A on myeloid Dendritic Cell	MR Egger	3	0.237872	0.595235	0.757966	-0.928787	1.40453	1.26855	0.395032	4.07362
ebi-a-GCST90001964	hUaYb5	ad	FSC-A on plasmacytoid Dendritic Cell	MR Egger	4	0.12077	0.115814	0.406526	-0.106224	0.347765	1.12837	0.899223	1.4159
ebi-a-GCST90001969	01dGA9	ad	FSC-A on Natural Killer	MR Egger	3	0.00567781	0.0864639	0.958255	-0.163791	0.175147	1.00569	0.848919	1.19142
ebi-a-GCST90001970	lWKfKG	ad	FSC-A on HLA DR+ Natural Killer	MR Egger	3	-0.0878989	0.0374764	0.256571	-0.161353	-0.0144451	0.915853	0.850992	0.985659
ebi-a-GCST90001979	5UFIei	ad	CD16 on CD14- CD16+ monocyte	MR Egger	10	-0.0355293	0.0143465	0.0383193	-0.0636485	-0.00741017	0.965094	0.938335	0.992617
ebi-a-GCST90001980	KHlT5p	ad	CD40 on CD14+ CD16- monocyte	MR Egger	4	0.0166402	0.0288364	0.6222	-0.039879	0.0731595	1.01678	0.960906	1.0759
ebi-a-GCST90001981	4yOTHe	ad	CD40 on CD14+ CD16+ monocyte	MR Egger	5	-0.0187775	0.0284429	0.556298	-0.0745256	0.0369705	0.981398	0.928184	1.03766
ebi-a-GCST90001984	xmVR0J	ad	HLA DR on CD14- CD16+ monocyte	MR Egger	6	-0.112084	0.121442	0.408272	-0.350111	0.125943	0.893969	0.70461	1.13422
ebi-a-GCST90001985	wjYDN3	ad	CD40 on monocytes	MR Egger	6	-0.00769128	0.0257444	0.780004	-0.0581503	0.0427677	0.992338	0.943508	1.0437
ebi-a-GCST90001987	MzuIRj	ad	CD64 on CD14+ CD16- monocyte	MR Egger	18	0.0156319	0.021419	0.476053	-0.0263494	0.0576132	1.01575	0.973995	1.05931
ebi-a-GCST90001988	b0D2Fn	ad	HLA DR on CD14+ CD16- monocyte	MR Egger	9	0.0361193	0.0717265	0.630021	-0.104465	0.176703	1.03678	0.900807	1.19328
ebi-a-GCST90001989	Iv7prw	ad	CD40 on CD14- CD16+ monocyte	MR Egger	9	0.00158516	0.0197611	0.938311	-0.0371467	0.040317	1.00159	0.963535	1.04114
ebi-a-GCST90001991	AY2ICl	ad	HLA DR on CD14+ monocyte	MR Egger	8	0.0353668	0.075355	0.6554	-0.112329	0.183062	1.036	0.89375	1.20089
ebi-a-GCST90002003	ywEqNR	ad	CCR2 on CD14- CD16-	MR Egger	3	-0.0432119	0.130842	0.79693	-0.299662	0.213238	0.957708	0.741069	1.23768
ebi-a-GCST90002004	fLNwE0	ad	CCR2 on CD14+ CD16- monocyte	MR Egger	3	-0.0382072	0.127925	0.815231	-0.288941	0.212526	0.962514	0.749057	1.2368
ebi-a-GCST90002005	2OmrRH	ad	CD16 on CD14+ CD16+ monocyte	MR Egger	7	-0.0196755	0.0288302	0.525276	-0.0761828	0.0368318	0.980517	0.926647	1.03752
ebi-a-GCST90002006	ZA7l6Y	ad	CD64 on monocyte	MR Egger	17	0.0240913	0.0196069	0.238109	-0.0143383	0.0625208	1.02438	0.985764	1.06452
ebi-a-GCST90002007	C6DjmL	ad	HLA DR on CD14+ CD16+ monocyte	MR Egger	6	-0.0282009	0.0599422	0.662527	-0.145688	0.0892858	0.972193	0.864428	1.09339
ebi-a-GCST90002009	fbwYOq	ad	HLA DR on CD14- CD16-	MR Egger	8	-0.00191671	0.101759	0.985583	-0.201365	0.197531	0.998085	0.817614	1.21839
ebi-a-GCST90002010	q0KzY4	ad	HLA DR on monocyte	MR Egger	8	-0.0126217	0.0278943	0.66682	-0.0672946	0.0420511	0.987458	0.93492	1.04295
ebi-a-GCST90002024	tJmG9b	ad	CD4 on naive CD4+ T cell	MR Egger	5	0.229261	0.326585	0.533244	-0.410845	0.869367	1.25767	0.66309	2.3854
ebi-a-GCST90002030	pvpOdh	ad	CD39 on CD39+ activated CD4 regulatory T cell	MR Egger	11	0.0287803	0.0536331	0.604543	-0.0763405	0.133901	1.0292	0.926501	1.14328
ebi-a-GCST90002031	BVLqAr	ad	CD39 on CD39+ secreting CD4 regulatory T cell	MR Egger	13	0.02902	0.0132592	0.0510875	0.00303186	0.0550081	1.02945	1.00304	1.05655
ebi-a-GCST90002032	H3eIir	ad	CD39 on CD39+ CD4+ T cell	MR Egger	12	0.0331829	0.0128587	0.0273894	0.00797976	0.058386	1.03374	1.00801	1.06012
ebi-a-GCST90002033	QdHcCq	ad	CD39 on granulocyte	MR Egger	3	-0.0185685	0.291896	0.959557	-0.590684	0.553547	0.981603	0.553948	1.73941
ebi-a-GCST90002035	zgC7mV	ad	CD80 on myeloid Dendritic Cell	MR Egger	4	-0.112755	0.0807098	0.297225	-0.270947	0.045436	0.893369	0.762657	1.04648
ebi-a-GCST90002036	iV9Jw1	ad	CD80 on CD62L+ myeloid Dendritic Cell	MR Egger	3	-0.149986	0.0648817	0.259917	-0.277155	-0.0228182	0.86072	0.757937	0.97744
ebi-a-GCST90002039	4P3SFb	ad	CD80 on monocyte	MR Egger	7	0.0123469	0.0245339	0.636164	-0.0357396	0.0604335	1.01242	0.964892	1.0623
ebi-a-GCST90002040	SPL66E	ad	CD80 on granulocyte	MR Egger	3	0.112292	0.11054	0.494996	-0.104367	0.328951	1.11884	0.900895	1.38951
ebi-a-GCST90002054	AgixsW	ad	CD8 on Central Memory CD8+ T cell	MR Egger	3	0.197332	0.0921073	0.278017	0.0168012	0.377862	1.21815	1.01694	1.45916
ebi-a-GCST90002056	iwU9Fg	ad	CD8 on Effector Memory CD8+ T cell	MR Egger	3	-0.140344	0.12179	0.455016	-0.379052	0.0983649	0.869059	0.68451	1.10337
ebi-a-GCST90002061	9eYxmj	ad	CD4 on CD39+ CD4+ T cell	MR Egger	7	0.00453821	0.0480775	0.928463	-0.0896937	0.0987701	1.00455	0.914211	1.10381
ebi-a-GCST90002067	Mmcx0d	ad	CD4 on CD39+ activated CD4 regulatory T cell	MR Egger	4	-0.364458	0.508143	0.547684	-1.36042	0.631502	0.694573	0.256554	1.88043
ebi-a-GCST90002069	dw9EGN	ad	CD4 on CD39+ secreting CD4 regulatory T cell	MR Egger	3	0.107618	0.0928793	0.453286	-0.0744255	0.289661	1.11362	0.928277	1.33598
ebi-a-GCST90002071	2usnT0	ad	SSC-A on myeloid Dendritic Cell	MR Egger	4	-0.139722	0.553072	0.824149	-1.22374	0.944299	0.8696	0.294127	2.57101
ebi-a-GCST90002072	hfd37q	ad	SSC-A on plasmacytoid Dendritic Cell	MR Egger	4	0.0427569	0.193007	0.845242	-0.335537	0.421051	1.04368	0.714954	1.52356
ebi-a-GCST90002073	KiodgE	ad	SSC-A on monocyte	MR Egger	10	0.00166054	0.0258632	0.950383	-0.0490312	0.0523523	1.00166	0.952151	1.05375
ebi-a-GCST90002074	BSLRAj	ad	SSC-A on CD14+ monocyte	MR Egger	6	-0.0197044	0.0349486	0.602992	-0.0882037	0.0487948	0.980488	0.915574	1.05
ebi-a-GCST90002077	cOaDt5	ad	SSC-A on HLA DR+ Natural Killer	MR Egger	4	-0.084418	0.0344024	0.133591	-0.151847	-0.0169893	0.919047	0.85912	0.983154
ebi-a-GCST90002087	99PqZf	ad	CD11c on myeloid Dendritic Cell	MR Egger	4	-0.338366	0.358004	0.444349	-1.04005	0.363322	0.712934	0.353436	1.4381
ebi-a-GCST90002098	kIvnqq	ad	CD45RA on naive CD4+ T cell	MR Egger	13	0.0414485	0.0131593	0.00924617	0.0156563	0.0672407	1.04232	1.01578	1.06955
ebi-a-GCST90002099	cQKYfQ	ad	CD4RA on Terminally Differentiated CD4+ T cell	MR Egger	4	0.0180279	0.0147693	0.346605	-0.0109199	0.0469756	1.01819	0.989139	1.0481
ebi-a-GCST90002102	jVVTW2	ad	CD45RA on resting CD4 regulatory T cell	MR Egger	9	0.0223979	0.00965783	0.0534617	0.00346856	0.0413272	1.02265	1.00347	1.04219
ebi-a-GCST90002104	8U6elL	ad	HLA DR on myeloid Dendritic Cell	MR Egger	10	-0.171854	0.0509733	0.00976464	-0.271761	-0.071946	0.842102	0.762036	0.930581
ebi-a-GCST90002105	LcvlDq	ad	HLA DR on plasmacytoid Dendritic Cell	MR Egger	14	-0.0215913	0.0562254	0.707686	-0.131793	0.0886105	0.97864	0.876522	1.09266
ebi-a-GCST90002106	HHEXhF	ad	HLA DR on Dendritic Cell	MR Egger	11	-0.101898	0.0511944	0.0777454	-0.202239	-0.00155674	0.903122	0.8169	0.998444
ebi-a-GCST90002108	10MYNa	ad	HLA DR on CD33+ HLA DR+ CD14-	MR Egger	9	-0.0741738	0.0353498	0.0740586	-0.143459	-0.00488829	0.92851	0.866356	0.995124
ebi-a-GCST90002109	iXTkdl	ad	HLA DR on CD33+ HLA DR+ CD14dim	MR Egger	3	-0.0727373	0.0887213	0.562819	-0.246631	0.101156	0.929845	0.781429	1.10645
ebi-a-GCST90002110	Drm4aJ	ad	HLA DR on CD33dim HLA DR+ CD11b+	MR Egger	7	0.044081	0.108435	0.701176	-0.168451	0.256613	1.04507	0.844972	1.29255
ebi-a-GCST90002111	ameh1K	ad	HLA DR on CD33dim HLA DR+ CD11b-	MR Egger	5	0.119917	0.457022	0.810008	-0.775846	1.01568	1.1274	0.460314	2.76124
ebi-a-GCST90002112	I6OL15	ad	HLA DR on CD33- HLA DR+	MR Egger	5	-0.0132936	0.0932447	0.895669	-0.196053	0.169466	0.986794	0.821969	1.18467
ebi-a-GCST90002116	2Wy0f5	ad	HLA DR on B cell	MR Egger	10	-0.00701005	0.0518356	0.895766	-0.108608	0.0945877	0.993014	0.897082	1.09921
ebi-a-GCST90002117	sLwOZ8	ad	HLA DR on HLA DR+ Natural Killer	MR Egger	5	-0.0112409	0.113012	0.927042	-0.232745	0.210263	0.988822	0.792356	1.234
ebi-a-GCST90002118	Wx2D2n	ad	CD8 on CD28+ CD45RA- CD8+ T cell	MR Egger	4	-0.0217595	0.433789	0.964553	-0.871987	0.828468	0.978476	0.41812	2.28981
ebi-a-GCST90002119	mK93wi	ad	CD8 on CD28+ CD45RA+ CD8+ T cell	MR Egger	8	0.0587526	0.0462337	0.250854	-0.0318654	0.149371	1.06051	0.968637	1.1611
ebi-a-GCST90002120	PDlAI4	ad	CD8 on CD28- CD8+ T cell	MR Egger	3	-0.01026	0.935862	0.993021	-1.84455	1.82403	0.989792	0.158097	6.19678
ebi-a-GCST90002121	1MXJFX	ad	CD8 on CD39+ CD8+ T cell	MR Egger	4	0.27184	0.185099	0.279676	-0.0909534	0.634634	1.31238	0.91306	1.88633
ebi-a-GCST90001399	Ure4zi	ad	IgD- CD27- B cell %B cell	Simple mode	3	0.0274811	0.0365412	0.530476	-0.0441397	0.0991019	1.02786	0.95682	1.10418
ebi-a-GCST90001417	WXoBE0	ad	CD24+ CD27+ B cell %B cell	Simple mode	3	0.132709	0.0891404	0.274974	-0.0420065	0.307424	1.14192	0.958864	1.35992
ebi-a-GCST90001432	7MpxWk	ad	Unswitched memory B cell %lymphocyte	Simple mode	3	-0.077483	0.0800557	0.435219	-0.234392	0.0794262	0.925443	0.791052	1.08267
ebi-a-GCST90001434	Axw6QC	ad	Switched memory B cell %lymphocyte	Simple mode	3	-0.100895	0.0487981	0.174606	-0.19654	-0.00525112	0.904028	0.821569	0.994763
ebi-a-GCST90001442	erehYt	ad	CD24+ CD27+ B cell %lymphocyte	Simple mode	3	0.255551	0.0797375	0.0851123	0.0992654	0.411836	1.29117	1.10436	1.50959
ebi-a-GCST90001450	lFzJXO	ad	CD62L- monocyte Absolute Count	Simple mode	4	0.0160201	0.0468079	0.754736	-0.0757234	0.107764	1.01615	0.927073	1.11378
ebi-a-GCST90001451	fbksmE	ad	CD62L- monocyte %monocyte	Simple mode	3	0.000605	0.029256	0.985381	-0.0567368	0.0579467	1.00061	0.944843	1.05966
ebi-a-GCST90001458	YG2GQg	ad	Myeloid Dendritic Cell Absolute Count	Simple mode	5	-0.063257	0.0574322	0.332534	-0.175824	0.0493101	0.938702	0.838765	1.05055
ebi-a-GCST90001462	NY4XdH	ad	CD62L- Dendritic Cell Absolute Count	Simple mode	4	-0.0577457	0.0576228	0.390121	-0.170686	0.055195	0.94389	0.843086	1.05675
ebi-a-GCST90001463	qIqsZF	ad	CD62L- Dendritic Cell %Dendritic Cell	Simple mode	3	-0.0613226	0.0480213	0.329819	-0.155444	0.0327991	0.94052	0.856035	1.03334
ebi-a-GCST90001464	8VmkKc	ad	CD86+ myeloid Dendritic Cell Absolute Count	Simple mode	4	-0.057738	0.0496564	0.329017	-0.155065	0.0395885	0.943897	0.85636	1.04038
ebi-a-GCST90001465	3E78En	ad	CD86+ myeloid Dendritic Cell %Dendritic Cell	Simple mode	4	-0.0692787	0.0481139	0.245519	-0.163582	0.0250246	0.933067	0.849097	1.02534
ebi-a-GCST90001468	VomKYe	ad	CD62L- myeloid Dendritic Cell Absolute Count	Simple mode	6	-0.0283205	0.0400583	0.511155	-0.106835	0.0501937	0.972077	0.898674	1.05147
ebi-a-GCST90001469	4FtSit	ad	CD62L- myeloid Dendritic Cell %Dendritic Cell	Simple mode	7	-0.0578668	0.0477786	0.271374	-0.151513	0.0357792	0.943776	0.859407	1.03643
ebi-a-GCST90001471	A1tSgF	ad	CD62L- plasmacytoid Dendritic Cell %Dendritic Cell	Simple mode	3	0.0120471	0.0425607	0.803741	-0.0713719	0.0954661	1.01212	0.931116	1.10017
ebi-a-GCST90001472	oGolpf	ad	CD62L- CD86+ myeloid Dendritic Cell Absolute Count	Simple mode	5	-0.0641086	0.0491036	0.261724	-0.160352	0.0321344	0.937903	0.851844	1.03266
ebi-a-GCST90001473	a8ZHVl	ad	CD62L- CD86+ myeloid Dendritic Cell %Dendritic Cell	Simple mode	6	-0.0613732	0.050463	0.278186	-0.160281	0.0375343	0.940472	0.851905	1.03825
ebi-a-GCST90001475	bdWjjD	ad	HLA DR++ monocyte %monocyte	Simple mode	3	-0.0862773	0.0314458	0.111132	-0.147911	-0.0246434	0.91734	0.862508	0.975658
ebi-a-GCST90001480	g7H8xO	ad	Resting CD4 regulatory T cell Absolute Count	Simple mode	6	0.0203854	0.0170223	0.284756	-0.0129783	0.0537491	1.02059	0.987106	1.05522
ebi-a-GCST90001481	cgQ95v	ad	Resting CD4 regulatory T cell %CD4 regulatory T cell	Simple mode	15	0.0180033	0.00937835	0.0755136	-0.000378	0.0363848	1.01817	0.999622	1.03705
ebi-a-GCST90001482	zi7rhx	ad	Resting CD4 regulatory T cell %CD4+ T cell	Simple mode	10	0.0263944	0.0123216	0.0608102	0.00224412	0.0505446	1.02675	1.00225	1.05184
ebi-a-GCST90001483	mLpXYj	ad	CD39+ resting CD4 regulatory T cell Absolute Count	Simple mode	18	0.02316	0.0159972	0.165876	-0.0081944	0.0545145	1.02343	0.991839	1.05603
ebi-a-GCST90001484	C4f0zM	ad	CD39+ resting CD4 regulatory T cell %resting CD4 regulatory T cell	Simple mode	15	0.012794	0.0144973	0.392402	-0.0156207	0.0412088	1.01288	0.984501	1.04207
ebi-a-GCST90001485	Jm1uoi	ad	CD39+ resting CD4 regulatory T cell %CD4 regulatory T cell	Simple mode	22	0.0251905	0.00983875	0.0182287	0.00590659	0.0444745	1.02551	1.00592	1.04548
ebi-a-GCST90001486	uOTe3c	ad	Activated CD4 regulatory T cell Absolute Count	Simple mode	3	-0.0346561	0.0211093	0.242343	-0.0760303	0.00671811	0.965938	0.926788	1.00674
ebi-a-GCST90001487	eAPiZv	ad	Activated CD4 regulatory T cell %CD4 regulatory T cell	Simple mode	5	-0.0184329	0.0149768	0.285835	-0.0477875	0.0109217	0.981736	0.953336	1.01098
ebi-a-GCST90001489	CvSRlD	ad	CD39+ activated CD4 regulatory T cell Absolute Count	Simple mode	13	0.00545612	0.0239985	0.823977	-0.0415809	0.0524932	1.00547	0.959272	1.0539
ebi-a-GCST90001491	WqLxa5	ad	CD39+ activated CD4 regulatory T cell %CD4 regulatory T cell	Simple mode	12	0.000376	0.0291395	0.989933	-0.0567373	0.0574895	1.00038	0.944842	1.05917
ebi-a-GCST90001492	H7Dc2t	ad	Secreting CD4 regulatory T cell Absolute Count	Simple mode	6	-0.0341572	0.0134869	0.0523628	-0.0605917	-0.00772283	0.96642	0.941207	0.992307
ebi-a-GCST90001493	1UQy5C	ad	Secreting CD4 regulatory T cell %CD4 regulatory T cell	Simple mode	11	-0.0254857	0.0109456	0.0421656	-0.0469391	-0.00403228	0.974836	0.954145	0.995976
ebi-a-GCST90001494	FXLdfU	ad	Secreting CD4 regulatory T cell %CD4+ T cell	Simple mode	10	-0.030834	0.0124432	0.0351078	-0.0552228	-0.0064453	0.969636	0.946274	0.993575
ebi-a-GCST90001495	ZsQiEt	ad	CD39+ secreting CD4 regulatory T cell Absolute Count	Simple mode	16	0.00239389	0.020168	0.90709	-0.0371354	0.0419232	1.0024	0.963546	1.04281
ebi-a-GCST90001496	5zt7zw	ad	CD39+ secreting CD4 regulatory T cell %secreting CD4 regulatory T cell	Simple mode	14	0.000528	0.0271337	0.984774	-0.0526542	0.0537099	1.00053	0.948708	1.05518
ebi-a-GCST90001497	PBUuH6	ad	CD39+ secreting CD4 regulatory T cell %CD4 regulatory T cell	Simple mode	13	-0.00471711	0.0245782	0.851012	-0.0528905	0.0434562	0.995294	0.948484	1.04441
ebi-a-GCST90001499	c4hqeu	ad	Activated & resting CD4 regulatory T cell %CD4 regulatory T cell	Simple mode	11	0.0254253	0.0101068	0.0306144	0.00561591	0.0452346	1.02575	1.00563	1.04627
ebi-a-GCST90001500	lmswJj	ad	Activated & resting CD4 regulatory T cell %CD4+ T cell	Simple mode	6	0.0201214	0.0162506	0.270608	-0.0117298	0.0519726	1.02033	0.988339	1.05335
ebi-a-GCST90001501	B8bF2c	ad	Activated & secreting CD4 regulatory T cell Absolute Count	Simple mode	6	-0.0221434	0.0137615	0.168513	-0.049116	0.00482922	0.9781	0.952071	1.00484
ebi-a-GCST90001502	RSG0Vb	ad	Activated & secreting CD4 regulatory T cell %CD4 regulatory T cell	Simple mode	15	-0.022558	0.0103248	0.0464	-0.0427947	-0.00232133	0.977695	0.958108	0.997681
ebi-a-GCST90001503	ZIMebt	ad	Activated & secreting CD4 regulatory T cell %CD4+ T cell	Simple mode	11	-0.0297653	0.0132057	0.0478557	-0.0556485	-0.00388213	0.970673	0.945872	0.996125
ebi-a-GCST90001507	o5PdKm	ad	CD25++ CD45RA+ CD4 not regulatory T cell Absolute Count	Simple mode	6	0.0323754	0.0139247	0.0676277	0.00508306	0.0596678	1.03291	1.0051	1.06148
ebi-a-GCST90001508	4yUDad	ad	CD25++ CD45RA+ CD4 not regulatory T cell %CD4+ T cell	Simple mode	9	0.0294676	0.0121156	0.0410604	0.0057211	0.0532142	1.02991	1.00574	1.05466
ebi-a-GCST90001509	vamPqZ	ad	CD25++ CD45RA+ CD4 not regulatory T cell %T cell	Simple mode	8	0.0312212	0.012872	0.0457207	0.00599209	0.0564504	1.03171	1.00601	1.05807
ebi-a-GCST90001510	YUP1j0	ad	CD25++ CD45RA- CD4 not regulatory T cell Absolute Count	Simple mode	4	-0.0515411	0.0222437	0.103357	-0.0951389	-0.00794338	0.949765	0.909247	0.992088
ebi-a-GCST90001511	pdwNGn	ad	CD25++ CD45RA- CD4 not regulatory T cell %CD4+ T cell	Simple mode	6	-0.0429965	0.0167008	0.0497618	-0.0757301	-0.0102629	0.957915	0.927066	0.98979
ebi-a-GCST90001512	37xpFN	ad	CD25++ CD45RA- CD4 not regulatory T cell %T cell	Simple mode	5	-0.0490086	0.018245	0.0548777	-0.0847688	-0.0132484	0.952173	0.918725	0.986839
ebi-a-GCST90001514	60Q6a7	ad	Hematopoietic Stem Cell Absolute Count	Simple mode	3	0.0224923	0.0219325	0.412951	-0.0204954	0.0654801	1.02275	0.979713	1.06767
ebi-a-GCST90001530	QrMnyU	ad	Monocytic Myeloid-Derived Suppressor Cells Absolute Count	Simple mode	4	0.0457221	0.0224222	0.134157	0.00177464	0.0896696	1.04678	1.00178	1.09381
ebi-a-GCST90001532	WwjAjA	ad	Basophil Absolute Count	Simple mode	3	0.00143251	0.016331	0.938094	-0.0305763	0.0334413	1.00143	0.969886	1.03401
ebi-a-GCST90001533	tpuwaW	ad	Basophil %CD33dim HLA DR- CD66b-	Simple mode	3	0.0262544	0.039137	0.571422	-0.0504541	0.102963	1.0266	0.950798	1.10845
ebi-a-GCST90001535	mC0NXX	ad	CD45RA- CD4+ T cell %CD4+ T cell	Simple mode	6	-0.032668	0.0169229	0.111433	-0.0658368	0.000501	0.96786	0.936284	1.0005
ebi-a-GCST90001536	OD6kJq	ad	CD45RA- CD4+ T cell %T cell	Simple mode	4	-0.0244	0.0181344	0.27112	-0.0599435	0.0111434	0.975895	0.941818	1.01121
ebi-a-GCST90001544	4XYWiY	ad	Effector Memory CD4+ T cell %T cell	Simple mode	4	0.0714736	0.0332647	0.120864	0.00627487	0.136672	1.07409	1.00629	1.14645
ebi-a-GCST90001546	vsmitp	ad	Terminally Differentiated CD4+ T cell %CD4+ T cell	Simple mode	3	0.0841363	0.0572105	0.2792	-0.0279964	0.196269	1.08778	0.972392	1.21685
ebi-a-GCST90001547	2TwTQI	ad	Terminally Differentiated CD4+ T cell %T cell	Simple mode	4	0.018628	0.0565447	0.763485	-0.0921995	0.129456	1.0188	0.911923	1.13821
ebi-a-GCST90001555	LzwxTZ	ad	Effector Memory CD8+ T cell %CD8+ T cell	Simple mode	6	-0.0101868	0.0164432	0.562713	-0.0424156	0.0220419	0.989865	0.958471	1.02229
ebi-a-GCST90001558	xuadsh	ad	Terminally Differentiated CD8+ T cell %CD8+ T cell	Simple mode	5	0.0335102	0.0203604	0.175139	-0.00639613	0.0734166	1.03408	0.993624	1.07618
ebi-a-GCST90001560	usThBK	ad	CD45RA+ CD8+ T cell Absolute Count	Simple mode	3	0.0238998	0.0529049	0.695712	-0.0797938	0.127593	1.02419	0.923307	1.13609
ebi-a-GCST90001561	Z0G3iE	ad	CD45RA+ CD8+ T cell %CD8+ T cell	Simple mode	7	0.00847065	0.0116609	0.494935	-0.0143847	0.031326	1.00851	0.985718	1.03182
ebi-a-GCST90001562	fGgyZ4	ad	CD45RA+ CD8+ T cell %T cell	Simple mode	4	0.0495542	0.0281343	0.176397	-0.00558911	0.104697	1.0508	0.994426	1.11037
ebi-a-GCST90001569	TdECnO	ad	Effector Memory CD4-CD8- T cell Absolute Count	Simple mode	4	-0.0276499	0.0577211	0.664669	-0.140783	0.0854834	0.972729	0.868678	1.08924
ebi-a-GCST90001570	sP6CaK	ad	Effector Memory CD4-CD8- T cell %CD4-CD8- T cell	Simple mode	4	-0.0155509	0.0173096	0.435181	-0.0494776	0.0183759	0.984569	0.951726	1.01855
ebi-a-GCST90001571	R9ufP9	ad	Effector Memory CD4-CD8- T cell %T cell	Simple mode	4	-0.0975732	0.0524179	0.1596	-0.200312	0.00516585	0.907036	0.818475	1.00518
ebi-a-GCST90001573	puZeuK	ad	Terminally Differentiated CD4-CD8- T cell %CD4-CD8- T cell	Simple mode	3	0.0172469	0.0150786	0.371148	-0.0123072	0.0468011	1.0174	0.987768	1.04791
ebi-a-GCST90001574	rjPTCU	ad	Terminally Differentiated CD4-CD8- T cell %T cell	Simple mode	4	-0.0821863	0.0562216	0.239949	-0.192381	0.028008	0.9211	0.824993	1.0284
ebi-a-GCST90001581	JaYMBL	ad	CD14- CD16- Absolute Count	Simple mode	3	0.0169501	0.0428905	0.730866	-0.0671152	0.101015	1.01709	0.935087	1.10629
ebi-a-GCST90001582	zjbOyn	ad	CD14+ CD16- monocyte Absolute Count	Simple mode	3	-0.0127806	0.0479437	0.814765	-0.10675	0.0811891	0.987301	0.89875	1.08458
ebi-a-GCST90001592	3MO8rE	ad	CD8+ T cell Absolute Count	Simple mode	3	0.0177036	0.0411918	0.709227	-0.0630323	0.0984395	1.01786	0.938913	1.10345
ebi-a-GCST90001596	wKWIUN	ad	CD8dim T cell Absolute Count	Simple mode	4	0.0203381	0.0456854	0.686354	-0.0692054	0.109882	1.02055	0.933135	1.11615
ebi-a-GCST90001597	Q4qTY6	ad	CD8dim T cell %T cell	Simple mode	3	0.0207546	0.0448609	0.689076	-0.0671727	0.108682	1.02097	0.935034	1.11481
ebi-a-GCST90001599	7sy6SK	ad	CD4-CD8- T cell %T cell	Simple mode	3	-0.0772752	0.0555181	0.29854	-0.186091	0.0315403	0.925635	0.830198	1.03204
ebi-a-GCST90001612	fRFj0i	ad	CD8dim T cell %leukocyte	Simple mode	3	0.0217498	0.0453268	0.678691	-0.0670907	0.11059	1.02199	0.93511	1.11694
ebi-a-GCST90001613	nOIUPn	ad	CD4-CD8- T cell %leukocyte	Simple mode	4	0.030987	0.0617362	0.650242	-0.0900159	0.15199	1.03147	0.913917	1.16415
ebi-a-GCST90001614	RFS3VV	ad	CD8+ and CD8dim T cell %leukocyte	Simple mode	3	-0.0525447	0.0687045	0.524313	-0.187205	0.0821161	0.948812	0.829273	1.08558
ebi-a-GCST90001618	yLtqVh	ad	HLA DR+ T cell Absolute Count	Simple mode	4	0.00680685	0.034356	0.855612	-0.060531	0.0741447	1.00683	0.941265	1.07696
ebi-a-GCST90001619	OT2s1U	ad	HLA DR+ T cell%T cell	Simple mode	3	0.00699625	0.0386637	0.873083	-0.0687845	0.082777	1.00702	0.933528	1.0863
ebi-a-GCST90001620	XPhmnP	ad	HLA DR+ T cell%lymphocyte	Simple mode	4	-0.00883061	0.033002	0.806366	-0.0735146	0.0558534	0.991208	0.929123	1.05744
ebi-a-GCST90001621	SkfGaX	ad	Natural Killer T Absolute Count	Simple mode	6	-0.00695693	0.0674681	0.92188	-0.139194	0.125281	0.993067	0.870059	1.13347
ebi-a-GCST90001622	taPnxW	ad	Natural Killer T %T cell	Simple mode	7	0.00594967	0.0429502	0.894358	-0.0782327	0.090132	1.00597	0.924749	1.09432
ebi-a-GCST90001623	TyWwZb	ad	Natural Killer T %lymphocyte	Simple mode	8	0.00589321	0.0401269	0.887379	-0.0727554	0.0845418	1.00591	0.929828	1.08822
ebi-a-GCST90001627	FvjD0X	ad	HLA DR+ CD8+ T cell Absolute Count	Simple mode	3	-0.0105986	0.0426894	0.82709	-0.0942698	0.0730727	0.989457	0.910037	1.07581
ebi-a-GCST90001628	CZnCbS	ad	HLA DR+ CD8+ T cell %T cell	Simple mode	3	-0.0117659	0.0405688	0.799103	-0.0912807	0.0677489	0.988303	0.912761	1.0701
ebi-a-GCST90001633	WMki1I	ad	CD8dim Natural Killer T Absolute Count	Simple mode	7	-0.00976209	0.0371905	0.801725	-0.0826555	0.0631314	0.990285	0.920668	1.06517
ebi-a-GCST90001634	c5ihPF	ad	CD8dim Natural Killer T %T cell	Simple mode	7	-0.0104867	0.0358683	0.779853	-0.0807886	0.0598153	0.989568	0.922389	1.06164
ebi-a-GCST90001635	Qz4jAp	ad	CD8dim Natural Killer T %lymphocyte	Simple mode	8	-0.00419634	0.0344892	0.906579	-0.0717951	0.0634024	0.995812	0.930722	1.06546
ebi-a-GCST90001637	SkjLbo	ad	CD4-CD8- Natural Killer T %T cell	Simple mode	8	-0.0160656	0.0359009	0.668036	-0.0864314	0.0543003	0.984063	0.917198	1.0558
ebi-a-GCST90001638	iZokvF	ad	CD4-CD8- Natural Killer T %lymphocyte	Simple mode	8	-0.0126205	0.0393189	0.757599	-0.0896856	0.0644446	0.987459	0.914219	1.06657
ebi-a-GCST90001643	sX3IRp	ad	B cell %CD3- lymphocyte	Simple mode	3	0.00446732	0.0232908	0.865603	-0.0411826	0.0501172	1.00448	0.959654	1.05139
ebi-a-GCST90001645	i9oIQ2	ad	Natural Killer Absolute Count	Simple mode	3	-0.079491	0.050548	0.256444	-0.178565	0.019583	0.923586	0.83647	1.01978
ebi-a-GCST90001646	UwptDb	ad	Natural Killer %CD3- lymphocyte	Simple mode	5	-0.0384909	0.0291004	0.256491	-0.0955277	0.018546	0.96224	0.908893	1.01872
ebi-a-GCST90001647	zL0NOo	ad	Natural Killer %lymphocyte	Simple mode	3	-0.0575193	0.0400206	0.287206	-0.13596	0.0209211	0.944104	0.872878	1.02114
ebi-a-GCST90001648	9hUFdp	ad	HLA DR+ Natural Killer Absolute Count	Simple mode	3	0.00811028	0.0510462	0.888356	-0.0919403	0.108161	1.00814	0.91216	1.11423
ebi-a-GCST90001649	yQSMZ4	ad	HLA DR+ Natural Killer %Natural Killer	Simple mode	5	-0.00252986	0.0250856	0.924523	-0.0516977	0.046638	0.997473	0.949616	1.04774
ebi-a-GCST90001650	tyeslR	ad	HLA DR+ Natural Killer %CD3- lymphocyte	Simple mode	4	-0.0341803	0.0365954	0.4192	-0.105907	0.0375466	0.966397	0.899508	1.03826
ebi-a-GCST90001658	Krwzz5	ad	CD39+ CD4+ T cell %T cell	Simple mode	17	-0.0289138	0.0255018	0.273584	-0.0788973	0.0210697	0.9715	0.924135	1.02129
ebi-a-GCST90001659	BKpbIM	ad	CD39+ CD4+ T cell %CD4+ T cell	Simple mode	15	-0.0312434	0.0282243	0.286966	-0.086563	0.0240762	0.96924	0.917078	1.02437
ebi-a-GCST90001660	pP5Dcn	ad	CD39+ CD4+ T cell Absolute Count	Simple mode	17	-0.0288194	0.024585	0.258261	-0.077006	0.0193671	0.971592	0.925884	1.01956
ebi-a-GCST90001661	ZNm3YD	ad	CD28- CD8dim T cell %T cell	Simple mode	3	0.109937	0.0620634	0.218511	-0.011707	0.231581	1.11621	0.988361	1.26059
ebi-a-GCST90001664	yhX3Ox	ad	CD28+ CD45RA+ CD8dim T cell %T cell	Simple mode	8	0.029237	0.0139248	0.0739114	0.00194435	0.0565297	1.02967	1.00195	1.05816
ebi-a-GCST90001665	wSlFn2	ad	CD28+ CD45RA+ CD8dim T cell %CD8dim T cell	Simple mode	7	0.0300635	0.0146139	0.0853884	0.00142027	0.0587068	1.03052	1.00142	1.06046
ebi-a-GCST90001666	H2AkZd	ad	CD28+ CD45RA+ CD8dim T cell Absolute Count	Simple mode	8	0.0116762	0.00950346	0.25891	-0.00695055	0.030303	1.01174	0.993074	1.03077
ebi-a-GCST90001667	EslJm1	ad	CD28+ CD45RA- CD8dim T cell %T cell	Simple mode	4	-0.00924121	0.0154595	0.592109	-0.0395418	0.0210594	0.990801	0.96123	1.02128
ebi-a-GCST90001668	StXSda	ad	CD28+ CD45RA- CD8dim T cell %CD8dim T cell	Simple mode	3	-0.0183634	0.014375	0.329685	-0.0465383	0.00981156	0.981804	0.954528	1.00986
ebi-a-GCST90001669	Q0WfNi	ad	CD28+ CD45RA- CD8dim T cell Absolute Count	Simple mode	4	-0.0204171	0.014831	0.262369	-0.0494858	0.00865161	0.97979	0.951719	1.00869
ebi-a-GCST90001670	UavKZX	ad	CD39+ CD8+ T cell %T cell	Simple mode	20	-0.0391453	0.0303508	0.212612	-0.0986328	0.0203422	0.961611	0.906075	1.02055
ebi-a-GCST90001671	ExZWJp	ad	CD39+ CD8+ T cell %CD8+ T cell	Simple mode	16	-0.0427292	0.0274486	0.140387	-0.0965285	0.0110701	0.958171	0.907984	1.01113
ebi-a-GCST90001672	lHSzKD	ad	CD39+ CD8+ T cell Absolute Count	Simple mode	21	-0.0344472	0.0325579	0.302655	-0.0982607	0.0293663	0.966139	0.906413	1.0298
ebi-a-GCST90001681	EvJJ4d	ad	CD25++ CD8+ T cell Absolute Count	Simple mode	3	-0.0825486	0.0608512	0.307755	-0.201817	0.0367198	0.920767	0.817244	1.0374
ebi-a-GCST90001686	KoHNTO	ad	CD28- CD8+ T cell %CD8+ T cell	Simple mode	4	0.10126	0.0664004	0.224669	-0.0288844	0.231405	1.10656	0.971529	1.26037
ebi-a-GCST90001687	IGqHSv	ad	CD28- CD8+ T cell Absolute Count	Simple mode	3	0.0676975	0.0472116	0.288019	-0.0248373	0.160232	1.07004	0.975469	1.17378
ebi-a-GCST90001688	MFiGXg	ad	CD28+ CD45RA+ CD8+ T cell %T cell	Simple mode	33	0.00405612	0.00309943	0.199968	-0.00201876	0.010131	1.00406	0.997983	1.01018
ebi-a-GCST90001691	op7QIN	ad	CD28+ CD45RA- CD8+ T cell %T cell	Simple mode	6	-0.0338923	0.0142888	0.0637983	-0.0618984	-0.00588627	0.966676	0.939978	0.994131
ebi-a-GCST90001692	L2jPqP	ad	CD28+ CD45RA- CD8+ T cell %CD8+ T cell	Simple mode	6	-0.0196531	0.0128911	0.187883	-0.0449198	0.00561348	0.980539	0.956074	1.00563
ebi-a-GCST90001693	OH9M7q	ad	CD28+ CD45RA- CD8+ T cell Absolute Count	Simple mode	4	-0.0189699	0.0171268	0.348852	-0.0525384	0.0145986	0.981209	0.948818	1.01471
ebi-a-GCST90001694	Ri4C9R	ad	CD28- CD4-CD8- T cell %T cell	Simple mode	3	-0.0909918	0.0560783	0.246147	-0.200905	0.0189216	0.913025	0.81799	1.0191
ebi-a-GCST90001695	Ghux4b	ad	CD45RA- CD28- CD8+ T cell Absolute Count	Simple mode	131	5.16e-05	1.84e-05	0.00588145	1.55e-05	8.77e-05	1.00005	1.00002	1.00009
ebi-a-GCST90001696	aau4wS	ad	CD45RA- CD28- CD8+ T cell %CD8+ T cell	Simple mode	11	7.94e-05	0.00111403	0.944576	-0.00210408	0.00226291	1.00008	0.997898	1.00227
ebi-a-GCST90001697	wvoDUT	ad	CD45RA- CD28- CD8+ T cell %T cell	Simple mode	36	0.00135329	0.000631	0.0390757	0.000116	0.00259056	1.00135	1.00012	1.00259
ebi-a-GCST90001698	NK6OFS	ad	CD45RA+ CD28- CD8+ T cell Absolute Count	Simple mode	540	1.86e-05	1.12e-05	0.0959253	-3.27e-06	4.06e-05	1.00002	0.999997	1.00004
ebi-a-GCST90001700	RLghpz	ad	CD45RA+ CD28- CD8+ T cell %T cell	Simple mode	69	0.000963	0.000376	0.0126071	0.000226	0.00169897	1.00096	1.00023	1.0017
ebi-a-GCST90001702	UyR7CG	ad	BAFF-R on CD24+ CD27+ B cell	Simple mode	22	0.0225002	0.0275018	0.422467	-0.0314034	0.0764038	1.02276	0.969085	1.0794
ebi-a-GCST90001703	sTEWnR	ad	BAFF-R on IgD+ CD24+ B cell	Simple mode	18	0.0128446	0.0221584	0.56974	-0.0305859	0.0562751	1.01293	0.969877	1.05789
ebi-a-GCST90001704	g2OkhP	ad	BAFF-R on IgD+ CD24- B cell	Simple mode	25	-0.0305476	0.0200943	0.141524	-0.0699324	0.00883723	0.969914	0.932457	1.00888
ebi-a-GCST90001705	MGSGAo	ad	BAFF-R on IgD+ CD38- B cell	Simple mode	19	0.0303324	0.0251835	0.244012	-0.0190272	0.0796921	1.0308	0.981153	1.08295
ebi-a-GCST90001706	Vumo5g	ad	BAFF-R on IgD+ CD38- naive B cell	Simple mode	12	0.00837336	0.0256383	0.750104	-0.0418777	0.0586244	1.00841	0.958987	1.06038
ebi-a-GCST90001707	IDCSt9	ad	BAFF-R on IgD+ CD38- unswitched memory B cell	Simple mode	14	0.00892317	0.021106	0.679366	-0.0324445	0.0502909	1.00896	0.968076	1.05158
ebi-a-GCST90001708	OSYpbN	ad	BAFF-R on IgD+ CD38+ B cell	Simple mode	22	0.000685	0.0202216	0.97329	-0.0389492	0.0403196	1.00069	0.9618	1.04114
ebi-a-GCST90001709	4TXFZz	ad	BAFF-R on IgD+ CD38dim B cell	Simple mode	26	-0.0373354	0.0178874	0.0472176	-0.0723947	-0.00227615	0.963353	0.930164	0.997726
ebi-a-GCST90001710	GZ1QSI	ad	BAFF-R on IgD- CD24- B cell	Simple mode	21	0.0165328	0.019911	0.416153	-0.0224929	0.0555584	1.01667	0.977758	1.05713
ebi-a-GCST90001711	rO181c	ad	BAFF-R on IgD- CD27- B cell	Simple mode	22	0.0183202	0.0244817	0.462564	-0.0296639	0.0663043	1.01849	0.970772	1.06855
ebi-a-GCST90001712	pTTNJ3	ad	BAFF-R on IgD- CD38- B cell	Simple mode	23	0.0134551	0.0223155	0.552707	-0.0302833	0.0571935	1.01355	0.970171	1.05886
ebi-a-GCST90001713	qvPMAY	ad	BAFF-R on IgD- CD38+ B cell	Simple mode	3	-0.0257518	0.0393816	0.580313	-0.10294	0.0514363	0.974577	0.902181	1.05278
ebi-a-GCST90001715	Rgbbut	ad	BAFF-R on memory B cell	Simple mode	19	0.0239705	0.022735	0.305672	-0.02059	0.0685311	1.02426	0.97962	1.07093
ebi-a-GCST90001716	WmlwfO	ad	BAFF-R on naive-mature B cell	Simple mode	25	-0.0318766	0.0179587	0.088585	-0.0670757	0.00332251	0.968626	0.935124	1.00333
ebi-a-GCST90001717	oG6epC	ad	BAFF-R on unswitched memory B cell	Simple mode	19	0.0244888	0.0236823	0.314806	-0.0219286	0.0709061	1.02479	0.97831	1.07348
ebi-a-GCST90001718	ArmzsW	ad	BAFF-R on switched memory B cell	Simple mode	23	0.0188841	0.0250429	0.458803	-0.0302	0.0679681	1.01906	0.970252	1.07033
ebi-a-GCST90001719	hizsJo	ad	BAFF-R on IgD+ B cell	Simple mode	25	-0.0314701	0.0185766	0.103191	-0.0678801	0.00493994	0.96902	0.934372	1.00495
ebi-a-GCST90001720	UkK0i7	ad	BAFF-R on transitional B cell	Simple mode	17	0.0302197	0.0229319	0.206128	-0.0147268	0.0751663	1.03068	0.985381	1.07806
ebi-a-GCST90001724	rcSXY5	ad	CD19 on IgD+ CD24+ B cell	Simple mode	3	0.0175346	0.06699	0.818007	-0.113766	0.148835	1.01769	0.892467	1.16048
ebi-a-GCST90001725	mbMbrU	ad	CD19 on IgD+ CD24- B cell	Simple mode	3	0.028623	0.0576315	0.668651	-0.0843348	0.141581	1.02904	0.919124	1.15209
ebi-a-GCST90001728	ra8uOq	ad	CD19 on IgD+ CD38- unswitched memory B cell	Simple mode	3	0.00757255	0.0435878	0.87807	-0.0778596	0.0930047	1.0076	0.925094	1.09747
ebi-a-GCST90001729	XSC2g4	ad	CD19 on IgD+ CD38+ B cell	Simple mode	5	0.00748142	0.0293583	0.811419	-0.0500609	0.0650237	1.00751	0.951172	1.06718
ebi-a-GCST90001730	ksHgIT	ad	CD19 on IgD+ CD38dim B cell	Simple mode	3	0.00950496	0.055424	0.879616	-0.0991262	0.118136	1.00955	0.905628	1.1254
ebi-a-GCST90001738	DC0cEY	ad	CD19 on unswitched memory B cell	Simple mode	3	0.0105116	0.0593164	0.875665	-0.105749	0.126772	1.01057	0.899651	1.13516
ebi-a-GCST90001742	lYtTiw	ad	CD19 on transitional B cell	Simple mode	3	0.0104445	0.0568691	0.871215	-0.101019	0.121908	1.0105	0.903916	1.12965
ebi-a-GCST90001743	DyL8uW	ad	CD20 on B cell	Simple mode	3	-0.00732516	0.0407525	0.873913	-0.0872	0.0725496	0.992702	0.916494	1.07525
ebi-a-GCST90001745	LFPYca	ad	CD20 on CD24+ CD27+ B cell	Simple mode	4	0.0607487	0.0356967	0.187347	-0.00921681	0.130714	1.06263	0.990826	1.13964
ebi-a-GCST90001747	125171	ad	CD20 on IgD+ CD24- B cell	Simple mode	3	-0.015229	0.040172	0.741081	-0.0939662	0.0635082	0.984886	0.910314	1.06557
ebi-a-GCST90001748	oIdGqK	ad	CD20 on IgD+ CD38- B cell	Simple mode	3	0.0606461	0.0503803	0.351825	-0.0380994	0.159391	1.06252	0.962617	1.1728
ebi-a-GCST90001751	9v3Tyv	ad	CD20 on IgD+ CD38+ B cell	Simple mode	4	-0.0539692	0.0439466	0.306986	-0.140105	0.0321661	0.947461	0.869267	1.03269
ebi-a-GCST90001752	Jr80cm	ad	CD20 on IgD+ CD38dim B cell	Simple mode	5	0.00809777	0.0376555	0.840249	-0.065707	0.0819026	1.00813	0.936405	1.08535
ebi-a-GCST90001754	xiOVII	ad	CD20 on IgD- CD27- B cell	Simple mode	4	0.0298592	0.0531611	0.613566	-0.0743366	0.134055	1.03031	0.928359	1.14346
ebi-a-GCST90001755	tl4mFu	ad	CD20 on IgD- CD38- B cell	Simple mode	4	0.0667403	0.0486096	0.263383	-0.0285344	0.162015	1.06902	0.971869	1.17588
ebi-a-GCST90001757	HdFOLd	ad	CD20 on IgD- CD38dim B cell	Simple mode	7	0.0613515	0.0396294	0.172559	-0.0163221	0.139025	1.06327	0.98381	1.14915
ebi-a-GCST90001758	44y7VH	ad	CD20 on memory B cell	Simple mode	3	0.0888305	0.0573055	0.26125	-0.0234882	0.201149	1.0929	0.976785	1.22281
ebi-a-GCST90001759	sDvfYS	ad	CD20 on naive-mature B cell	Simple mode	3	-0.0170498	0.0444576	0.738273	-0.104187	0.0700871	0.983095	0.901057	1.0726
ebi-a-GCST90001760	zuPhrD	ad	CD20 on unswitched memory B cell	Simple mode	4	0.087164	0.0437388	0.140298	0.00143596	0.172892	1.09108	1.00144	1.18874
ebi-a-GCST90001761	IxX3Yk	ad	CD20 on switched memory B cell	Simple mode	7	0.0514802	0.0371648	0.215296	-0.0213628	0.124323	1.05283	0.978864	1.13238
ebi-a-GCST90001762	E9pG3r	ad	CD20 on IgD+ B cell	Simple mode	3	-0.00618334	0.0403468	0.892263	-0.085263	0.0728964	0.993836	0.918271	1.07562
ebi-a-GCST90001765	9pictr	ad	CD24 on IgD+ CD24+ B cell	Simple mode	3	-0.0162868	0.0309897	0.651653	-0.0770265	0.044453	0.983845	0.925865	1.04546
ebi-a-GCST90001771	Wku3IT	ad	CD24 on memory B cell	Simple mode	3	-0.0158316	0.0333482	0.681764	-0.0811941	0.049531	0.984293	0.922015	1.05078
ebi-a-GCST90001775	Shf4sD	ad	CD25 on B cell	Simple mode	3	-0.0280935	0.0382303	0.538915	-0.103025	0.0468378	0.972297	0.902105	1.04795
ebi-a-GCST90001777	pVErsF	ad	CD25 on CD24+ CD27+ B cell	Simple mode	3	-0.00668805	0.0357493	0.868856	-0.0767568	0.0633807	0.993334	0.926115	1.06543
ebi-a-GCST90001779	Z24Y33	ad	CD25 on IgD+ CD24- B cell	Simple mode	4	-0.0218978	0.0314297	0.536109	-0.0835	0.0397044	0.97834	0.919891	1.0405
ebi-a-GCST90001784	RHDFjB	ad	CD25 on IgD+ CD38dim B cell	Simple mode	3	0.00372296	0.0338965	0.922569	-0.0627142	0.0701602	1.00373	0.939212	1.07268
ebi-a-GCST90001787	CD8zrZ	ad	CD25 on IgD- CD38- B cell	Simple mode	3	0.033558	0.0358652	0.448217	-0.0367377	0.103854	1.03413	0.963929	1.10944
ebi-a-GCST90001789	7UNlHL	ad	CD25 on IgD- CD38dim B cell	Simple mode	3	-0.0390661	0.0304862	0.328537	-0.098819	0.0206869	0.961687	0.905907	1.0209
ebi-a-GCST90001790	iyyyfx	ad	CD25 on memory B cell	Simple mode	3	-0.00616175	0.0319673	0.864953	-0.0688177	0.0564942	0.993857	0.933497	1.05812
ebi-a-GCST90001791	JcCvBn	ad	CD25 on naive-mature B cell	Simple mode	4	-0.0268959	0.0336621	0.4827	-0.0928737	0.0390818	0.973463	0.911309	1.03986
ebi-a-GCST90001792	0whGPu	ad	CD25 on unswitched memory B cell	Simple mode	3	-0.00671888	0.0352903	0.866579	-0.0758879	0.0624501	0.993304	0.92692	1.06444
ebi-a-GCST90001798	YdA0Qm	ad	CD27 on CD24+ CD27+ B cell	Simple mode	11	0.0118681	0.0329479	0.726183	-0.0527098	0.076446	1.01194	0.948655	1.07944
ebi-a-GCST90001800	SisK8F	ad	CD27 on IgD+ CD24+ B cell	Simple mode	7	0.105433	0.0434493	0.0514008	0.0202726	0.190594	1.11119	1.02048	1.20997
ebi-a-GCST90001801	zJJZ7T	ad	CD27 on IgD+ CD38- unswitched memory B cell	Simple mode	4	0.0626989	0.0298673	0.126656	0.00415893	0.121239	1.06471	1.00417	1.12889
ebi-a-GCST90001802	rwzTLV	ad	CD27 on IgD- CD38- B cell	Simple mode	7	-0.0306363	0.0295015	0.33908	-0.0884593	0.0271866	0.969828	0.91534	1.02756
ebi-a-GCST90001804	1Vq6c5	ad	CD27 on IgD- CD38dim B cell	Simple mode	9	-0.0178831	0.0296222	0.562761	-0.0759426	0.0401763	0.982276	0.926869	1.04099
ebi-a-GCST90001805	6XfMp6	ad	CD27 on memory B cell	Simple mode	8	0.0409912	0.0456057	0.398611	-0.0483959	0.130378	1.04184	0.952757	1.13926
ebi-a-GCST90001806	xVsu9U	ad	CD27 on unswitched memory B cell	Simple mode	10	0.0438802	0.0379375	0.277195	-0.0304773	0.118238	1.04486	0.969982	1.12551
ebi-a-GCST90001808	mulhyR	ad	CD27 on switched memory B cell	Simple mode	10	0.0101854	0.0285897	0.729855	-0.0458505	0.0662213	1.01024	0.955185	1.06846
ebi-a-GCST90001813	2dwq4s	ad	CD38 on IgD+ CD38dim B cell	Simple mode	4	0.035636	0.0363675	0.399403	-0.0356443	0.106916	1.03628	0.964983	1.11284
ebi-a-GCST90001815	hOt64P	ad	CD38 on IgD- CD38dim B cell	Simple mode	4	0.0379311	0.0387143	0.399453	-0.037949	0.113811	1.03866	0.962762	1.12054
ebi-a-GCST90001816	sDiMPv	ad	CD38 on naive-mature B cell	Simple mode	4	0.0426354	0.0441478	0.405412	-0.0438942	0.129165	1.04356	0.957055	1.13788
ebi-a-GCST90001819	1aqFBG	ad	CD38 on transitional B cell	Simple mode	5	0.0019447	0.035415	0.958842	-0.0674688	0.0713582	1.00195	0.934757	1.07397
ebi-a-GCST90001820	4SOoW3	ad	IgD on IgD+ CD24+ B cell	Simple mode	6	0.113068	0.0773345	0.203576	-0.0385075	0.264644	1.11971	0.962224	1.30297
ebi-a-GCST90001821	jyTpWf	ad	IgD on IgD+ CD24- B cell	Simple mode	3	0.0181819	0.0422195	0.70869	-0.0645683	0.100932	1.01835	0.937472	1.1062
ebi-a-GCST90001825	lSRUwW	ad	IgD on IgD+ CD38dim B cell	Simple mode	3	0.0177335	0.0396071	0.698169	-0.0598964	0.0953634	1.01789	0.941862	1.10006
ebi-a-GCST90001826	EKyMwD	ad	IgD on unswitched memory B cell	Simple mode	6	0.148221	0.0786699	0.118255	-0.00597229	0.302414	1.15977	0.994046	1.35312
ebi-a-GCST90001828	zyLT6t	ad	IgD on transitional B cell	Simple mode	3	-0.0818112	0.0677602	0.350704	-0.214621	0.0509989	0.921446	0.806847	1.05232
ebi-a-GCST90001829	3zttjK	ad	BAFF-R on B cell	Simple mode	21	0.00427402	0.0184977	0.819618	-0.0319815	0.0405296	1.00428	0.968524	1.04136
ebi-a-GCST90001838	sigCzA	ad	CD3 on naive CD8+ T cell	Simple mode	8	0.024603	0.020379	0.266533	-0.0153398	0.0645458	1.02491	0.984777	1.06667
ebi-a-GCST90001839	HWkBXe	ad	CD3 on Effector Memory CD8+ T cell	Simple mode	3	-0.0276895	0.045394	0.603948	-0.116662	0.0612827	0.97269	0.889886	1.0632
ebi-a-GCST90001841	1992Pl	ad	CD3 on Central Memory CD4+ T cell	Simple mode	5	0.0169533	0.0285423	0.584493	-0.0389895	0.0728961	1.0171	0.961761	1.07562
ebi-a-GCST90001842	5j1tK6	ad	CD3 on Naive CD4+ T cell	Simple mode	6	0.0140726	0.0262974	0.615493	-0.0374704	0.0656155	1.01417	0.963223	1.06782
ebi-a-GCST90001845	r5XEfg	ad	CD3 on CD45RA- CD4+ T cell	Simple mode	4	0.0315512	0.0210079	0.230134	-0.00962417	0.0727267	1.03205	0.990422	1.07544
ebi-a-GCST90001846	jE5yV2	ad	CD3 on Central Memory CD8+ T cell	Simple mode	4	-0.011411	0.0416995	0.802114	-0.093142	0.0703201	0.988654	0.911064	1.07285
ebi-a-GCST90001851	NJLPtH	ad	CD3 on T cell	Simple mode	3	0.04898	0.0283978	0.226709	-0.00667969	0.10464	1.0502	0.993343	1.11031
ebi-a-GCST90001853	ZOK01v	ad	CD3 on activated CD4 regulatory T cell	Simple mode	6	0.0108588	0.026266	0.696433	-0.0406225	0.0623402	1.01092	0.960192	1.06432
ebi-a-GCST90001854	IJXpij	ad	CD3 on CD39+ activated CD4 regulatory T cell	Simple mode	6	0.00992527	0.0258779	0.717085	-0.0407954	0.060646	1.00997	0.960025	1.06252
ebi-a-GCST90001855	Lik0Gb	ad	CD3 on secreting CD4 regulatory T cell	Simple mode	4	-0.0210043	0.0351031	0.591762	-0.0898064	0.0477977	0.979215	0.914108	1.04896
ebi-a-GCST90001856	5AfbTE	ad	CD3 on CD39+ secreting CD4 regulatory T cell	Simple mode	5	0.00336524	0.0370688	0.932029	-0.0692896	0.0760201	1.00337	0.933056	1.07898
ebi-a-GCST90001857	Ldoexc	ad	CD3 on activated & secreting CD4 regulatory T cell	Simple mode	6	-0.0145491	0.0222669	0.54235	-0.0581922	0.029094	0.985556	0.943469	1.02952
ebi-a-GCST90001858	gIrbgk	ad	CD3 on CD45RA+ CD4+ T cell	Simple mode	8	0.00799859	0.0284577	0.786784	-0.0477785	0.0637757	1.00803	0.953345	1.06585
ebi-a-GCST90001859	qiAGRL	ad	CD3 on CD8+ T cell	Simple mode	3	-0.0176827	0.0420688	0.715101	-0.100137	0.0647721	0.982473	0.904713	1.06692
ebi-a-GCST90001860	SiaogK	ad	CD3 on CD39+ CD4+ T cell	Simple mode	5	0.0108574	0.0232403	0.664684	-0.0346935	0.0564084	1.01092	0.965901	1.05803
ebi-a-GCST90001861	zJI4Wu	ad	CD3 on CD28+ CD4+ T cell	Simple mode	3	0.0439215	0.0231348	0.198044	-0.00142264	0.0892657	1.0449	0.998578	1.09337
ebi-a-GCST90001863	AlFkgi	ad	CD3 on CD28+ CD45RA- CD8+ T cell	Simple mode	5	0.0381823	0.0321588	0.300796	-0.024849	0.101214	1.03892	0.975457	1.10651
ebi-a-GCST90001864	YzQcl2	ad	CD3 on CD28+ CD45RA+ CD8+ T cell	Simple mode	7	0.0216628	0.0180099	0.274349	-0.0136366	0.0569623	1.0219	0.986456	1.05862
ebi-a-GCST90001867	r5hrIY	ad	CD3 on CD4+ T cell	Simple mode	3	-0.0228934	0.0449306	0.661038	-0.110957	0.0651705	0.977367	0.894977	1.06734
ebi-a-GCST90001868	JJXyZv	ad	CD3 on CD4 regulatory T cell	Simple mode	5	-0.014044	0.0313663	0.677519	-0.0755219	0.047434	0.986054	0.927259	1.04858
ebi-a-GCST90001869	WbXu6p	ad	CD3 on resting CD4 regulatory T cell	Simple mode	7	-0.0151425	0.0245021	0.559281	-0.0631667	0.0328816	0.984972	0.938787	1.03343
ebi-a-GCST90001870	aq3DI1	ad	CD34 on Hematopoietic Stem Cell	Simple mode	4	0.0361853	0.0433995	0.465585	-0.0488777	0.121248	1.03685	0.952298	1.12891
ebi-a-GCST90001883	DrHRbu	ad	CD16-CD56 on Natural Killer T	Simple mode	7	0.00734271	0.0296958	0.812947	-0.0508611	0.0655465	1.00737	0.950411	1.06774
ebi-a-GCST90001884	uH5Eyv	ad	CD16-CD56 on Natural Killer	Simple mode	9	-0.0266575	0.0260606	0.336286	-0.0777363	0.0244212	0.973695	0.925208	1.02472
ebi-a-GCST90001886	erpCXO	ad	CD28 on CD39+ activated CD4 regulatory T cell	Simple mode	3	-0.0114271	0.0490496	0.837457	-0.107564	0.0847102	0.988638	0.898019	1.0884
ebi-a-GCST90001887	vM22Za	ad	CD28 on secreting CD4 regulatory T cell	Simple mode	4	0.00657965	0.0507559	0.90506	-0.0929019	0.106061	1.0066	0.911283	1.11189
ebi-a-GCST90001891	5uRLx9	ad	CD28 on CD45RA- CD4 not regulatory T cell	Simple mode	3	-0.00837422	0.0258751	0.776919	-0.0590893	0.0423409	0.991661	0.942623	1.04325
ebi-a-GCST90001892	D3LvOB	ad	CD28 on CD39+ CD4+ T cell	Simple mode	8	-0.0145778	0.0324343	0.66669	-0.078149	0.0489935	0.985528	0.924827	1.05021
ebi-a-GCST90001894	8ML4BV	ad	CD28 on CD28+ CD4+ T cell	Simple mode	3	-0.00818663	0.0315996	0.819806	-0.0701218	0.0537485	0.991847	0.93228	1.05522
ebi-a-GCST90001898	OHx3fW	ad	CD28 on CD4+ T cell	Simple mode	3	-0.00860951	0.0303781	0.803504	-0.0681506	0.0509315	0.991427	0.93412	1.05225
ebi-a-GCST90001907	j4dGKn	ad	CCR7 on naive CD4+ T cell	Simple mode	4	-0.0211014	0.0391398	0.627239	-0.0978155	0.0556127	0.97912	0.906816	1.05719
ebi-a-GCST90001926	iDhplJ	ad	CD127 on granulocyte	Simple mode	8	-0.0463918	0.0302272	0.168714	-0.105637	0.0128536	0.954668	0.899751	1.01294
ebi-a-GCST90001932	kMnbXz	ad	CD127 on CD45RA+ CD4+ T cell	Simple mode	4	0.0762751	0.0649202	0.324799	-0.0509686	0.203519	1.07926	0.950309	1.22571
ebi-a-GCST90001946	VGlAAY	ad	CD33 on CD14+ monocyte	Simple mode	8	0.0167146	0.0212689	0.457715	-0.0249725	0.0584017	1.01686	0.975337	1.06014
ebi-a-GCST90001947	UEHLz0	ad	CD33 on CD33+ HLA DR+ CD14dim	Simple mode	6	0.0309233	0.0173971	0.135631	-0.00317497	0.0650216	1.03141	0.99683	1.06718
ebi-a-GCST90001948	0pUxFy	ad	CD33 on CD33dim HLA DR+ CD11b+	Simple mode	7	0.0236211	0.0213825	0.311614	-0.0182887	0.0655308	1.0239	0.981878	1.06773
ebi-a-GCST90001949	5td6iy	ad	CD33 on CD33dim HLA DR+ CD11b-	Simple mode	7	0.0126143	0.0230827	0.604444	-0.0326277	0.0578564	1.01269	0.967899	1.05956
ebi-a-GCST90001950	MjVxTn	ad	CD33 on Granulocytic Myeloid-Derived Suppressor Cells	Simple mode	3	0.0281924	0.0189388	0.275009	-0.00892755	0.0653124	1.02859	0.991112	1.06749
ebi-a-GCST90001951	RCNrSy	ad	CD33 on CD66b++ myeloid cell	Simple mode	6	-0.00650342	0.025948	0.812071	-0.0573615	0.0443547	0.993518	0.944253	1.04535
ebi-a-GCST90001952	horFa4	ad	CD33 on Monocytic Myeloid-Derived Suppressor Cells	Simple mode	4	0.00345349	0.0176516	0.857388	-0.0311436	0.0380506	1.00346	0.969336	1.03878
ebi-a-GCST90001953	lWHSCu	ad	CD33 on CD33dim HLA DR-	Simple mode	5	-0.00240124	0.0198611	0.909599	-0.0413289	0.0365264	0.997602	0.959513	1.0372
ebi-a-GCST90001954	dcPQXI	ad	CD33 on basophil	Simple mode	8	0.0139269	0.0220317	0.547385	-0.0292552	0.057109	1.01402	0.971169	1.05877
ebi-a-GCST90001955	gjui1T	ad	CD33 on Immature Myeloid-Derived Suppressor Cells	Simple mode	6	0.0206745	0.0252745	0.450566	-0.0288635	0.0702126	1.02089	0.971549	1.07274
ebi-a-GCST90001956	WhwnGC	ad	CD33 on CD33+ HLA DR+	Simple mode	5	0.0262203	0.0171684	0.201414	-0.0074298	0.0598705	1.02657	0.992598	1.0617
ebi-a-GCST90001957	SvpGGr	ad	CD33 on CD33+ HLA DR+ CD14-	Simple mode	5	0.0260302	0.0176187	0.213625	-0.00850247	0.0605629	1.02637	0.991534	1.06243
ebi-a-GCST90001961	z1wfSc	ad	CD25 on CD39+ CD4+ T cell	Simple mode	9	-0.0279996	0.0411085	0.515027	-0.108572	0.052573	0.972389	0.897114	1.05398
ebi-a-GCST90001963	3PbSJY	ad	FSC-A on myeloid Dendritic Cell	Simple mode	3	-0.0528133	0.0327648	0.248304	-0.117032	0.0114057	0.948557	0.889556	1.01147
ebi-a-GCST90001964	hUaYb5	ad	FSC-A on plasmacytoid Dendritic Cell	Simple mode	4	-0.0770724	0.0624526	0.305029	-0.19948	0.0453347	0.925823	0.819157	1.04638
ebi-a-GCST90001969	01dGA9	ad	FSC-A on Natural Killer	Simple mode	3	-0.0040668	0.0379591	0.92446	-0.0784666	0.070333	0.995941	0.924533	1.07287
ebi-a-GCST90001970	lWKfKG	ad	FSC-A on HLA DR+ Natural Killer	Simple mode	3	0.0560755	0.0658188	0.483973	-0.0729294	0.18508	1.05768	0.929666	1.20332
ebi-a-GCST90001979	5UFIei	ad	CD16 on CD14- CD16+ monocyte	Simple mode	10	0.0537509	0.031906	0.126337	-0.00878478	0.116287	1.05522	0.991254	1.12332
ebi-a-GCST90001980	KHlT5p	ad	CD40 on CD14+ CD16- monocyte	Simple mode	4	-0.0181304	0.0185273	0.399956	-0.054444	0.0181832	0.982033	0.947012	1.01835
ebi-a-GCST90001981	4yOTHe	ad	CD40 on CD14+ CD16+ monocyte	Simple mode	5	0.0177339	0.0192538	0.409142	-0.0200035	0.0554714	1.01789	0.980195	1.05704
ebi-a-GCST90001984	xmVR0J	ad	HLA DR on CD14- CD16+ monocyte	Simple mode	6	0.027324	0.042292	0.546706	-0.0555683	0.110216	1.0277	0.945947	1.11652
ebi-a-GCST90001985	wjYDN3	ad	CD40 on monocytes	Simple mode	6	0.00772149	0.0161565	0.652872	-0.0239453	0.0393883	1.00775	0.976339	1.04017
ebi-a-GCST90001987	MzuIRj	ad	CD64 on CD14+ CD16- monocyte	Simple mode	18	-0.0161437	0.0239929	0.510084	-0.0631697	0.0308823	0.983986	0.938784	1.03136
ebi-a-GCST90001988	b0D2Fn	ad	HLA DR on CD14+ CD16- monocyte	Simple mode	9	-0.041879	0.0329116	0.238942	-0.106386	0.0226277	0.958986	0.899078	1.02289
ebi-a-GCST90001989	Iv7prw	ad	CD40 on CD14- CD16+ monocyte	Simple mode	9	0.00852469	0.0203755	0.686675	-0.0314113	0.0484607	1.00856	0.969077	1.04965
ebi-a-GCST90001991	AY2ICl	ad	HLA DR on CD14+ monocyte	Simple mode	8	-0.0260181	0.0338734	0.467545	-0.09241	0.0403738	0.974317	0.911731	1.0412
ebi-a-GCST90002003	ywEqNR	ad	CCR2 on CD14- CD16-	Simple mode	3	-0.011344	0.0451512	0.825082	-0.0998404	0.0771524	0.98872	0.904982	1.08021
ebi-a-GCST90002004	fLNwE0	ad	CCR2 on CD14+ CD16- monocyte	Simple mode	3	-0.010973	0.0364513	0.791803	-0.0824175	0.0604716	0.989087	0.920887	1.06234
ebi-a-GCST90002005	2OmrRH	ad	CD16 on CD14+ CD16+ monocyte	Simple mode	7	-0.0440977	0.0333453	0.234189	-0.109455	0.0212591	0.95686	0.896323	1.02149
ebi-a-GCST90002006	ZA7l6Y	ad	CD64 on monocyte	Simple mode	17	-0.0137104	0.0270343	0.618969	-0.0666976	0.0392768	0.986383	0.935478	1.04006
ebi-a-GCST90002007	C6DjmL	ad	HLA DR on CD14+ CD16+ monocyte	Simple mode	6	0.0101072	0.0275478	0.728713	-0.0438866	0.0641009	1.01016	0.957062	1.0662
ebi-a-GCST90002009	fbwYOq	ad	HLA DR on CD14- CD16-	Simple mode	8	0.00935418	0.0231749	0.698528	-0.0360686	0.054777	1.0094	0.964574	1.05631
ebi-a-GCST90002010	q0KzY4	ad	HLA DR on monocyte	Simple mode	8	-0.0385119	0.0234783	0.144945	-0.0845292	0.00750551	0.96222	0.918945	1.00753
ebi-a-GCST90002024	tJmG9b	ad	CD4 on naive CD4+ T cell	Simple mode	5	-0.101641	0.0396355	0.0623475	-0.179327	-0.0239554	0.903354	0.835833	0.976329
ebi-a-GCST90002030	pvpOdh	ad	CD39 on CD39+ activated CD4 regulatory T cell	Simple mode	11	-0.0275056	0.0255507	0.306984	-0.0775849	0.0225738	0.972869	0.925348	1.02283
ebi-a-GCST90002031	BVLqAr	ad	CD39 on CD39+ secreting CD4 regulatory T cell	Simple mode	13	0.00939341	0.0202762	0.651458	-0.0303479	0.0491347	1.00944	0.970108	1.05036
ebi-a-GCST90002032	H3eIir	ad	CD39 on CD39+ CD4+ T cell	Simple mode	12	-0.00225065	0.0222793	0.921353	-0.0459181	0.0414168	0.997752	0.95512	1.04229
ebi-a-GCST90002033	QdHcCq	ad	CD39 on granulocyte	Simple mode	3	0.130155	0.0557256	0.144586	0.0209331	0.239377	1.13901	1.02115	1.27046
ebi-a-GCST90002035	zgC7mV	ad	CD80 on myeloid Dendritic Cell	Simple mode	4	-0.0101205	0.0615142	0.87978	-0.130688	0.110447	0.989931	0.877491	1.11678
ebi-a-GCST90002036	iV9Jw1	ad	CD80 on CD62L+ myeloid Dendritic Cell	Simple mode	3	-0.0292703	0.0510778	0.624451	-0.129383	0.0708423	0.971154	0.878638	1.07341
ebi-a-GCST90002039	4P3SFb	ad	CD80 on monocyte	Simple mode	7	0.0158487	0.0285062	0.598333	-0.0400233	0.0717208	1.01597	0.960767	1.07436
ebi-a-GCST90002040	SPL66E	ad	CD80 on granulocyte	Simple mode	3	0.0850481	0.0383809	0.157045	0.00982161	0.160275	1.08877	1.00987	1.17383
ebi-a-GCST90002054	AgixsW	ad	CD8 on Central Memory CD8+ T cell	Simple mode	3	0.0418094	0.0298505	0.296315	-0.0166976	0.100316	1.0427	0.983441	1.10552
ebi-a-GCST90002056	iwU9Fg	ad	CD8 on Effector Memory CD8+ T cell	Simple mode	3	-0.0190822	0.0276631	0.561603	-0.0733018	0.0351374	0.981099	0.92932	1.03576
ebi-a-GCST90002061	9eYxmj	ad	CD4 on CD39+ CD4+ T cell	Simple mode	7	0.0609264	0.0359583	0.141134	-0.00955193	0.131405	1.06282	0.990494	1.14043
ebi-a-GCST90002067	Mmcx0d	ad	CD4 on CD39+ activated CD4 regulatory T cell	Simple mode	4	0.0133233	0.0383944	0.751499	-0.0619298	0.0885764	1.01341	0.939949	1.09262
ebi-a-GCST90002069	dw9EGN	ad	CD4 on CD39+ secreting CD4 regulatory T cell	Simple mode	3	0.062757	0.0328398	0.196172	-0.00160896	0.127123	1.06477	0.998392	1.13556
ebi-a-GCST90002071	2usnT0	ad	SSC-A on myeloid Dendritic Cell	Simple mode	4	0.00319955	0.0434752	0.945965	-0.0820119	0.088411	1.0032	0.921261	1.09244
ebi-a-GCST90002072	hfd37q	ad	SSC-A on plasmacytoid Dendritic Cell	Simple mode	4	-0.012738	0.0654196	0.858059	-0.14096	0.115484	0.987343	0.868524	1.12242
ebi-a-GCST90002073	KiodgE	ad	SSC-A on monocyte	Simple mode	10	-0.00578603	0.0262162	0.830248	-0.0571698	0.0455977	0.994231	0.944434	1.04665
ebi-a-GCST90002074	BSLRAj	ad	SSC-A on CD14+ monocyte	Simple mode	6	-0.03401	0.0260514	0.248565	-0.0850708	0.0170508	0.966562	0.918447	1.0172
ebi-a-GCST90002077	cOaDt5	ad	SSC-A on HLA DR+ Natural Killer	Simple mode	4	-0.0335939	0.0416577	0.478999	-0.115243	0.0480552	0.966964	0.89115	1.04923
ebi-a-GCST90002087	99PqZf	ad	CD11c on myeloid Dendritic Cell	Simple mode	4	-0.00720313	0.0617455	0.914502	-0.128224	0.113818	0.992823	0.879656	1.12055
ebi-a-GCST90002098	kIvnqq	ad	CD45RA on naive CD4+ T cell	Simple mode	13	0.0240363	0.0128742	0.0865134	-0.00119723	0.0492698	1.02433	0.998803	1.0505
ebi-a-GCST90002099	cQKYfQ	ad	CD4RA on Terminally Differentiated CD4+ T cell	Simple mode	4	0.0345918	0.0180305	0.150857	-0.000748	0.0699315	1.0352	0.999252	1.07243
ebi-a-GCST90002102	jVVTW2	ad	CD45RA on resting CD4 regulatory T cell	Simple mode	9	0.0149725	0.013202	0.289587	-0.0109034	0.0408485	1.01509	0.989156	1.04169
ebi-a-GCST90002104	8U6elL	ad	HLA DR on myeloid Dendritic Cell	Simple mode	10	0.00238265	0.0422196	0.956229	-0.0803678	0.0851331	1.00239	0.922777	1.08886
ebi-a-GCST90002105	LcvlDq	ad	HLA DR on plasmacytoid Dendritic Cell	Simple mode	14	0.014907	0.0452851	0.747262	-0.0738519	0.103666	1.01502	0.928809	1.10923
ebi-a-GCST90002106	HHEXhF	ad	HLA DR on Dendritic Cell	Simple mode	11	0.0185044	0.0273474	0.513979	-0.0350965	0.0721054	1.01868	0.965512	1.07477
ebi-a-GCST90002108	10MYNa	ad	HLA DR on CD33+ HLA DR+ CD14-	Simple mode	9	-0.0339824	0.0187839	0.108036	-0.0707988	0.00283407	0.966589	0.931649	1.00284
ebi-a-GCST90002109	iXTkdl	ad	HLA DR on CD33+ HLA DR+ CD14dim	Simple mode	3	-0.0457238	0.02607	0.221542	-0.096821	0.00537343	0.955306	0.907718	1.00539
ebi-a-GCST90002110	Drm4aJ	ad	HLA DR on CD33dim HLA DR+ CD11b+	Simple mode	7	0.0185136	0.0527636	0.737671	-0.0849031	0.12193	1.01869	0.918601	1.12968
ebi-a-GCST90002111	ameh1K	ad	HLA DR on CD33dim HLA DR+ CD11b-	Simple mode	5	0.0571516	0.0527528	0.339576	-0.0462439	0.160547	1.05882	0.954809	1.17415
ebi-a-GCST90002112	I6OL15	ad	HLA DR on CD33- HLA DR+	Simple mode	5	-0.000586	0.0321307	0.986324	-0.0635622	0.0623903	0.999414	0.938416	1.06438
ebi-a-GCST90002116	2Wy0f5	ad	HLA DR on B cell	Simple mode	10	0.00947749	0.0383069	0.810143	-0.0656041	0.084559	1.00952	0.936502	1.08824
ebi-a-GCST90002117	sLwOZ8	ad	HLA DR on HLA DR+ Natural Killer	Simple mode	5	0.0314031	0.0379019	0.453941	-0.0428847	0.105691	1.0319	0.958022	1.11148
ebi-a-GCST90002118	Wx2D2n	ad	CD8 on CD28+ CD45RA- CD8+ T cell	Simple mode	4	-0.0863273	0.0720345	0.316795	-0.227515	0.0548604	0.917294	0.796511	1.05639
ebi-a-GCST90002119	mK93wi	ad	CD8 on CD28+ CD45RA+ CD8+ T cell	Simple mode	8	-0.0225419	0.0325892	0.511409	-0.0864166	0.0413329	0.97771	0.917212	1.0422
ebi-a-GCST90002120	PDlAI4	ad	CD8 on CD28- CD8+ T cell	Simple mode	3	0.0327184	0.0638971	0.659556	-0.0925199	0.157957	1.03326	0.911631	1.17112
ebi-a-GCST90002121	1MXJFX	ad	CD8 on CD39+ CD8+ T cell	Simple mode	4	0.0672469	0.0410164	0.199639	-0.0131454	0.147639	1.06956	0.986941	1.15909
ebi-a-GCST90001395	Y3cpMr	ad	IgD+ CD38- B cell %B cell	Wald ratio	1	0.0479643	0.0602342	0.42586	-0.0700948	0.166023	1.04913	0.932305	1.1806
ebi-a-GCST90001397	DtQJIR	ad	Unswitched memory B cell %B cell	Wald ratio	1	0.279229	0.0981805	0.00445459	0.0867952	0.471663	1.32211	1.09067	1.60266
ebi-a-GCST90001406	VMKJ76	ad	Memory B cell %B cell	Wald ratio	1	0.196249	0.108343	0.0700837	-0.016103	0.4086	1.21683	0.984026	1.50471
ebi-a-GCST90001407	0Z2YPr	ad	Memory B cell Absolute Count	Wald ratio	1	-0.198266	0.1	0.0474055	-0.394266	-0.0022659	0.820152	0.674175	0.997737
ebi-a-GCST90001408	xBRERY	ad	Naive-mature B cell %B cell	Wald ratio	1	-0.206237	0.113857	0.0700837	-0.429397	0.0169226	0.81364	0.650902	1.01707
ebi-a-GCST90001410	g50dJc	ad	IgD- CD38+ B cell %B cell	Wald ratio	1	-0.0810235	0.0604122	0.179863	-0.199431	0.0373845	0.922172	0.819196	1.03809
ebi-a-GCST90001412	lhJNIG	ad	IgD+ CD24+ B cell Absolute Count	Wald ratio	1	-0.174733	0.0881304	0.0474055	-0.347468	-0.00199694	0.839682	0.706475	0.998005
ebi-a-GCST90001415	Wi1vjG	ad	IgD+ CD24- B cell %B cell	Wald ratio	1	-0.0637681	0.0550725	0.246907	-0.17171	0.0441739	0.938223	0.842223	1.04516
ebi-a-GCST90001418	9d07Id	ad	CD24+ CD27+ B cell Absolute Count	Wald ratio	1	-0.202839	0.102306	0.0474055	-0.403359	-0.00231816	0.81641	0.668072	0.997685
ebi-a-GCST90001422	xtXbq4	ad	CD20- CD38- B cell %B cell	Wald ratio	1	-0.00754672	0.0425252	0.859143	-0.090896	0.0758026	0.992482	0.913113	1.07875
ebi-a-GCST90001429	c06JPR	ad	IgD+ CD38+ B cell %lymphocyte	Wald ratio	1	-0.0950792	0.0975813	0.329878	-0.286339	0.0961802	0.909301	0.751008	1.10096
ebi-a-GCST90001431	pNNpd2	ad	IgD+ CD38- B cell %lymphocyte	Wald ratio	1	-0.200117	0.100933	0.0474055	-0.397946	-0.00228705	0.818635	0.671698	0.997716
ebi-a-GCST90001435	jFUyUM	ad	Plasma Blast-Plasma Cell %lymphocyte	Wald ratio	1	0.130435	0.0655738	0.0466868	0.00191019	0.258959	1.13932	1.00191	1.29558
ebi-a-GCST90001452	ns09UY	ad	CD11c+ CD62L- monocyte Absolute Count	Wald ratio	1	-0.144831	0.0685462	0.0346091	-0.279182	-0.0104809	0.865168	0.756402	0.989574
ebi-a-GCST90001457	XIEfyO	ad	CD11c+ HLA DR++ monocyte %monocyte	Wald ratio	1	0.073957	0.0530973	0.163663	-0.0301138	0.178028	1.07676	0.970335	1.19486
ebi-a-GCST90001460	687kpb	ad	Plasmacytoid Dendritic Cell Absolute Count	Wald ratio	1	-0.134744	0.0480124	0.00500904	-0.228849	-0.0406402	0.873939	0.795449	0.960175
ebi-a-GCST90001467	ERqF0H	ad	CD86+ plasmacytoid Dendritic Cell %Dendritic Cell	Wald ratio	1	-0.0963855	0.0463673	0.0376412	-0.187265	-0.00550566	0.908114	0.829224	0.994509
ebi-a-GCST90001476	a4Vcug	ad	HLA DR++ monocyte %leukocyte	Wald ratio	1	-0.0699816	0.0309392	0.0237033	-0.130622	-0.0093407	0.932411	0.877549	0.990703
ebi-a-GCST90001479	gFsiLO	ad	CD4 regulatory T cell %T cell	Wald ratio	1	-0.0496592	0.0574489	0.387364	-0.162259	0.0629406	0.951554	0.850221	1.06496
ebi-a-GCST90001498	wHovVK	ad	Activated & resting CD4 regulatory T cell Absolute Count	Wald ratio	1	0.0278699	0.0550763	0.61284	-0.0800796	0.13582	1.02826	0.923043	1.14548
ebi-a-GCST90001504	vSO22l	ad	CD25++ CD4+ T cell Absolute Count	Wald ratio	1	-0.0646486	0.0311351	0.037858	-0.125674	-0.00362378	0.937397	0.881903	0.996383
ebi-a-GCST90001505	KHv0k4	ad	CD25++ CD4+ T cell %CD4+ T cell	Wald ratio	1	-0.0505068	0.0243243	0.037858	-0.0981824	-0.00283108	0.950748	0.906484	0.997173
ebi-a-GCST90001506	mg2GUr	ad	CD25++ CD4+ T cell %T cell	Wald ratio	1	-0.0579907	0.0279286	0.037858	-0.112731	-0.00325058	0.943659	0.893391	0.996755
ebi-a-GCST90001517	0Z1xcD	ad	CD33+ HLA DR+ Absolute Count	Wald ratio	1	0.0911797	0.0251623	0.00029	0.0418615	0.140498	1.09547	1.04275	1.15085
ebi-a-GCST90001518	ZxPiIb	ad	CD33+ HLA DR+ CD14- Absolute Count	Wald ratio	1	0.0894611	0.0246881	0.00029	0.0410725	0.13785	1.09358	1.04193	1.1478
ebi-a-GCST90001519	Z2lmwk	ad	CD33+ HLA DR+ CD14- %CD33+ HLA DR+	Wald ratio	1	0.0907928	0.0294118	0.00202217	0.0331458	0.14844	1.09504	1.0337	1.16002
ebi-a-GCST90001521	KoTYlk	ad	CD33+ HLA DR+ CD14dim %CD33+ HLA DR+	Wald ratio	1	0.0147106	0.0235531	0.532251	-0.0314534	0.0608746	1.01482	0.969036	1.06277
ebi-a-GCST90001522	U5x4j9	ad	CD33- HLA DR- Absolute Count	Wald ratio	1	-0.0052521	0.0430672	0.902938	-0.0896639	0.0791597	0.994762	0.914238	1.08238
ebi-a-GCST90001523	x9IXSM	ad	CD33- HLA DR+ Absolute Count	Wald ratio	1	-0.10304	0.0339518	0.00240628	-0.169585	-0.0364943	0.902091	0.844015	0.964164
ebi-a-GCST90001525	zq6PDe	ad	CD33dim HLA DR+ CD11b+ Absolute Count	Wald ratio	1	0.039358	0.0309515	0.203514	-0.0213068	0.100023	1.04014	0.978919	1.1052
ebi-a-GCST90001537	EUb5f7	ad	Central Memory CD4+ T cell Absolute Count	Wald ratio	1	-0.0981976	0.0503418	0.0511026	-0.196868	0.000472	0.90647	0.821299	1.00047
ebi-a-GCST90001538	sUrJAe	ad	Central Memory CD4+ T cell %CD4+ T cell	Wald ratio	1	-0.0243337	0.0480881	0.61284	-0.118586	0.0699189	0.97596	0.888175	1.07242
ebi-a-GCST90001542	CmjDbi	ad	Effector Memory CD4+ T cell Absolute Count	Wald ratio	1	-0.0253348	0.0191964	0.186913	-0.0629598	0.0122902	0.974983	0.938981	1.01237
ebi-a-GCST90001545	azAFPg	ad	Terminally Differentiated CD4+ T cell Absolute Count	Wald ratio	1	0.0431694	0.0590164	0.464485	-0.0725027	0.158842	1.04411	0.930063	1.17215
ebi-a-GCST90001548	a0cBFb	ad	Central Memory CD8+ T cell Absolute Count	Wald ratio	1	-0.0485318	0.0269984	0.0722431	-0.101449	0.00438499	0.952627	0.903528	1.00439
ebi-a-GCST90001552	RY4VsA	ad	Naive CD8+ T cell %CD8+ T cell	Wald ratio	1	-0.213748	0.079096	0.00688448	-0.368776	-0.0587194	0.807552	0.69158	0.942971
ebi-a-GCST90001557	XOAZlg	ad	Terminally Differentiated CD8+ T cell Absolute Count	Wald ratio	1	0.0549163	0.0570084	0.335396	-0.0568201	0.166653	1.05645	0.944764	1.18134
ebi-a-GCST90001568	5EhrOj	ad	Naive CD4-CD8- T cell %T cell	Wald ratio	1	-0.211564	0.0584757	0.000297	-0.326176	-0.0969514	0.809318	0.721678	0.9076
ebi-a-GCST90001572	quKjuQ	ad	Terminally Differentiated CD4-CD8- T cell Absolute Count	Wald ratio	1	-0.0547703	0.0441696	0.214975	-0.141343	0.0318021	0.946703	0.868192	1.03231
ebi-a-GCST90001575	yG5jv1	ad	Naive CD4+ T cell %T cell	Wald ratio	1	0.0747664	0.0632638	0.237278	-0.0492308	0.198763	1.07763	0.951961	1.21989
ebi-a-GCST90001583	aUEOLa	ad	Monocyte Absolute Count	Wald ratio	1	-0.030479	0.0587808	0.604097	-0.145689	0.0847315	0.969981	0.864426	1.08842
ebi-a-GCST90001586	cfmbaA	ad	CD14+ CD16- monocyte %monocyte	Wald ratio	1	0.162205	0.107087	0.129847	-0.047685	0.372094	1.1761	0.953434	1.45077
ebi-a-GCST90001587	m47oFU	ad	CD16+ monocyte %monocyte	Wald ratio	1	-0.161189	0.106416	0.129847	-0.369765	0.0473865	0.851131	0.690896	1.04853
ebi-a-GCST90001589	1TouZ0	ad	CD4+/CD8+ T cell	Wald ratio	1	0.0645669	0.0824147	0.433369	-0.0969659	0.2261	1.0667	0.907587	1.2537
ebi-a-GCST90001590	fzkH63	ad	CD4+ T cell Absolute Count	Wald ratio	1	-0.085963	0.0440696	0.0511026	-0.172339	0.000413	0.917628	0.841693	1.00041
ebi-a-GCST90001593	JLCGKj	ad	CD8+ T cell %T cell	Wald ratio	1	-0.0635988	0.0811789	0.433369	-0.222709	0.0955119	0.938381	0.800347	1.10022
ebi-a-GCST90001601	dNT3ZH	ad	Lymphocyte Absolute Count	Wald ratio	1	-0.10437	0.0550129	0.057802	-0.212195	0.00345501	0.900892	0.808807	1.00346
ebi-a-GCST90001602	7qKAzH	ad	Lymphocyte %leukocyte	Wald ratio	1	-0.0146471	0.069241	0.832467	-0.15036	0.121065	0.98546	0.860399	1.1287
ebi-a-GCST90001606	oVWc60	ad	CD4+ T cell %leukocyte	Wald ratio	1	0.119708	0.0829133	0.148804	-0.0428024	0.282218	1.12717	0.958101	1.32607
ebi-a-GCST90001608	aYYcui	ad	CD4+CD8+ T cell %leukocyte	Wald ratio	1	0.0311751	0.0301473	0.301094	-0.0279137	0.0902638	1.03167	0.972472	1.09446
ebi-a-GCST90001609	vet5uQ	ad	CD4+ CD8dim T cell Absolute Count	Wald ratio	1	0.118689	0.0757307	0.117056	-0.0297431	0.267121	1.12602	0.970695	1.3062
ebi-a-GCST90001610	SNJ0Da	ad	CD4+ CD8dim T cell %lymphocyte	Wald ratio	1	0.0931526	0.0594369	0.117056	-0.0233438	0.209649	1.09763	0.976927	1.23325
ebi-a-GCST90001611	JPX2W3	ad	CD4+ CD8dim T cell %leukocyte	Wald ratio	1	0.0996653	0.0635924	0.117056	-0.0249758	0.224306	1.1048	0.975333	1.25145
ebi-a-GCST90001625	fDnLM6	ad	HLA DR+ CD4+ T cell %T cell	Wald ratio	1	-0.0311141	0.0324523	0.337678	-0.0947206	0.0324925	0.969365	0.909627	1.03303
ebi-a-GCST90001631	mstj0s	ad	CD8+ Natural Killer T %T cell	Wald ratio	1	0.0517241	0.0544335	0.341997	-0.0549655	0.158414	1.05309	0.946518	1.17165
ebi-a-GCST90001632	ex2zZU	ad	CD8+ Natural Killer T %lymphocyte	Wald ratio	1	0.0666498	0.0547841	0.22376	-0.0407271	0.174027	1.06892	0.960091	1.19009
ebi-a-GCST90001639	5UGJFB	ad	CD3- lymphocyte Absolute Count	Wald ratio	1	0.0219512	0.0243902	0.36812	-0.0258537	0.0697561	1.02219	0.974478	1.07225
ebi-a-GCST90001641	rkotJS	ad	CD3- lymphocyte %leukocyte	Wald ratio	1	-0.0943482	0.0656335	0.150576	-0.22299	0.0342935	0.909966	0.800123	1.03489
ebi-a-GCST90001642	q10Ypt	ad	B cell Absolute Count	Wald ratio	1	-0.106051	0.0637606	0.0962593	-0.231021	0.01892	0.899379	0.793722	1.0191
ebi-a-GCST90001652	Wevwd6	ad	Granulocyte %leukocyte	Wald ratio	1	0.0145503	0.0687831	0.832467	-0.120265	0.149365	1.01466	0.886686	1.1611
ebi-a-GCST90001653	mc7hnP	ad	CD28- CD4-CD8- T cell %CD4-CD8- T cell	Wald ratio	1	0.0850103	0.0591376	0.150576	-0.0308994	0.20092	1.08873	0.969573	1.22253
ebi-a-GCST90001655	OUi1YZ	ad	CD28+ CD4-CD8- T cell %T cell	Wald ratio	1	-0.0723327	0.0566606	0.201745	-0.183388	0.0387221	0.930221	0.832445	1.03948
ebi-a-GCST90001656	EoMIgQ	ad	CD28+ CD4-CD8- T cell %CD4-CD8- T cell	Wald ratio	1	-0.0850103	0.0591376	0.150576	-0.20092	0.0308994	0.918503	0.817978	1.03138
ebi-a-GCST90001662	ag7mSs	ad	CD28- CD8dim T cell %CD8dim T cell	Wald ratio	1	0.0906702	0.0630749	0.150576	-0.0329566	0.214297	1.09491	0.967581	1.23899
ebi-a-GCST90001678	kbRVu3	ad	CD28- CD25++ CD8+ T cell Absolute Count	Wald ratio	1	-0.180964	0.0544771	0.000894	-0.28774	-0.0741891	0.834465	0.749957	0.928496
ebi-a-GCST90001680	OgYke2	ad	CD25++ CD8+ T cell %CD8+ T cell	Wald ratio	1	0	0.027125	1	-0.053165	0.053165	1	0.948224	1.0546
ebi-a-GCST90001689	T1vw5Y	ad	CD28+ CD45RA+ CD8+ T cell %CD8+ T cell	Wald ratio	1	0.0141297	0.0293617	0.630354	-0.0434192	0.0716785	1.01423	0.95751	1.07431
ebi-a-GCST90001699	1EJGvi	ad	CD45RA+ CD28- CD8+ T cell %CD8+ T cell	Wald ratio	1	0.00313297	0.00313297	0.317311	-0.00300765	0.00927359	1.00314	0.996997	1.00932
ebi-a-GCST90001714	93rSKf	ad	BAFF-R on IgD- CD38dim B cell	Wald ratio	1	-0.0615296	0.0471535	0.191934	-0.153951	0.0308913	0.940325	0.857314	1.03137
ebi-a-GCST90001721	mhd1dg	ad	CD19 on CD20- B cell	Wald ratio	1	-0.0148662	0.0272547	0.585441	-0.0682854	0.038553	0.985244	0.933994	1.03931
ebi-a-GCST90001722	fbirPz	ad	CD19 on CD20- CD38- B cell	Wald ratio	1	0.0179727	0.0690151	0.794542	-0.117297	0.153242	1.01814	0.889321	1.16561
ebi-a-GCST90001733	vVoUFW	ad	CD19 on IgD- CD38- B cell	Wald ratio	1	0.0920502	0.0599721	0.124812	-0.0254951	0.209596	1.09642	0.974827	1.23318
ebi-a-GCST90001753	VYFuZ3	ad	CD20 on IgD- CD24- B cell	Wald ratio	1	0.075	0.0510204	0.141562	-0.025	0.175	1.07788	0.97531	1.19125
ebi-a-GCST90001774	uPe7N8	ad	CD24 on transitional B cell	Wald ratio	1	-0.0491142	0.0390222	0.208167	-0.125598	0.0273694	0.952072	0.88197	1.02775
ebi-a-GCST90001782	vT23Fe	ad	CD25 on IgD+ CD38- unswitched memory B cell	Wald ratio	1	0.00903681	0.0216002	0.675679	-0.0332995	0.0513732	1.00908	0.967249	1.05272
ebi-a-GCST90001795	BIfStc	ad	CD25 on transitional B cell	Wald ratio	1	-0.0572583	0.0582688	0.325775	-0.171465	0.0569485	0.94435	0.84243	1.0586
ebi-a-GCST90001799	Gy1tSQ	ad	CD27 on T cell	Wald ratio	1	-0.0330977	0.0260283	0.203514	-0.0841131	0.0179177	0.967444	0.919327	1.01808
ebi-a-GCST90001807	keUQqz	ad	CD27 on Plasma Blast-Plasma Cell	Wald ratio	1	-0.0721024	0.0552561	0.191934	-0.180404	0.0361995	0.930436	0.834933	1.03686
ebi-a-GCST90001810	BUdOuf	ad	CD38 on CD3- CD19-	Wald ratio	1	-0.0270812	0.0446339	0.544022	-0.114564	0.0604012	0.973282	0.891755	1.06226
ebi-a-GCST90001818	KDsPVb	ad	CD38 on IgD+ B cell	Wald ratio	1	0.0367441	0.0598122	0.539001	-0.0804877	0.153976	1.03743	0.922666	1.16646
ebi-a-GCST90001823	0G0Ofd	ad	IgD on IgD+ CD38- unswitched memory B cell	Wald ratio	1	0.137476	0.110358	0.212862	-0.0788249	0.353778	1.14737	0.924202	1.42444
ebi-a-GCST90001827	21n1DF	ad	IgD on IgD+ B cell	Wald ratio	1	0.0211549	0.0468839	0.651831	-0.0707376	0.113047	1.02138	0.931706	1.11969
ebi-a-GCST90001830	68fSHa	ad	BAFF-R on CD20- B cell	Wald ratio	1	-0.00782918	0.0351127	0.823557	-0.0766501	0.0609917	0.992201	0.926214	1.06289
ebi-a-GCST90001834	C7l4HD	ad	CD62L on monocyte	Wald ratio	1	-0.00581135	0.0194457	0.765054	-0.0439249	0.0323022	0.994205	0.957026	1.03283
ebi-a-GCST90001840	HMFOMa	ad	CD3 on Terminally Differentiated CD8+ T cell	Wald ratio	1	0.0757356	0.040521	0.0616162	-0.00368548	0.155157	1.07868	0.996321	1.16784
ebi-a-GCST90001843	Pqbv6P	ad	CD3 on Effector Memory CD4+ T cell	Wald ratio	1	0.0420377	0.0173949	0.0156634	0.00794367	0.0761317	1.04293	1.00798	1.0791
ebi-a-GCST90001844	WvXuy6	ad	CD3 on Terminally Differentiated CD4+ T cell	Wald ratio	1	0.0668615	0.0306905	0.0293635	0.00670807	0.127015	1.06915	1.00673	1.13543
ebi-a-GCST90001849	IU05mr	ad	CD3 on HLA DR+ CD4+ T cell	Wald ratio	1	0.0417427	0.0191606	0.0293635	0.00418796	0.0792974	1.04263	1.0042	1.08253
ebi-a-GCST90001850	SgLods	ad	CD3 on HLA DR+ CD8+ T cell	Wald ratio	1	0.0659537	0.0299465	0.0276384	0.00725847	0.124649	1.06818	1.00728	1.13275
ebi-a-GCST90001852	e1lnjr	ad	CD3 on CD39+ resting CD4 regulatory T cell	Wald ratio	1	0.0575804	0.0254211	0.023509	0.00775498	0.107406	1.05927	1.00779	1.11339
ebi-a-GCST90001865	SJ9OfF	ad	CD3 on CD28- CD8+ T cell	Wald ratio	1	0.0688648	0.0346411	0.046817	0.000968	0.136761	1.07129	1.00097	1.14655
ebi-a-GCST90001866	SIENyr	ad	CD3 on CD39+ CD8+ T cell	Wald ratio	1	0.0523455	0.0240275	0.0293635	0.00525172	0.0994394	1.05374	1.00527	1.10455
ebi-a-GCST90001871	OTWZWF	ad	HVEM on T cell	Wald ratio	1	0.0356145	0.0286313	0.213535	-0.0205028	0.0917318	1.03626	0.979706	1.09607
ebi-a-GCST90001873	KDStvZ	ad	HVEM on Effector Memory CD8+ T cell	Wald ratio	1	0.0357018	0.0287014	0.213535	-0.020553	0.0919566	1.03635	0.979657	1.09632
ebi-a-GCST90001875	MChcnG	ad	HVEM on CD4+ T cell	Wald ratio	1	0.0348361	0.0280055	0.213535	-0.0200546	0.0897268	1.03545	0.980145	1.09388
ebi-a-GCST90001876	8fYv0d	ad	HVEM on Central Memory CD4+ T cell	Wald ratio	1	0.0357018	0.0287014	0.213535	-0.020553	0.0919566	1.03635	0.979657	1.09632
ebi-a-GCST90001877	tayAej	ad	HVEM on naive CD4+ T cell	Wald ratio	1	0.0422705	0.0330113	0.200374	-0.0224316	0.106973	1.04318	0.977818	1.1129
ebi-a-GCST90001878	xx3aMV	ad	HVEM on Effector Memory CD4+ T cell	Wald ratio	1	0.0298404	0.0281055	0.288359	-0.0252464	0.0849271	1.03029	0.97507	1.08864
ebi-a-GCST90001879	L3HXdD	ad	HVEM on Terminally Differentiated CD4+ T cell	Wald ratio	1	0.0524769	0.0344249	0.127411	-0.0149958	0.11995	1.05388	0.985116	1.12744
ebi-a-GCST90001880	4sL6Ml	ad	HVEM on CD45RA- CD4+ T cell	Wald ratio	1	0.0339547	0.0272969	0.213535	-0.0195473	0.0874567	1.03454	0.980643	1.0914
ebi-a-GCST90001881	2dd33O	ad	HVEM on CD8+ T cell	Wald ratio	1	0.0483746	0.0317337	0.127411	-0.0138235	0.110573	1.04956	0.986272	1.11692
ebi-a-GCST90001882	vwOeEZ	ad	HVEM on Central Memory CD8+ T cell	Wald ratio	1	0.0329884	0.0265201	0.213535	-0.0189909	0.0849677	1.03354	0.981188	1.08868
ebi-a-GCST90001903	9tEsVR	ad	CD86 on myeloid Dendritic Cell	Wald ratio	1	0.0467667	0.0238645	0.0500335	-7.7e-06	0.0935412	1.04788	0.999992	1.09806
ebi-a-GCST90001913	hdOWAb	ad	CD45 on granulocyte	Wald ratio	1	-0.304624	0.0531792	1.01e-08	-0.408855	-0.200393	0.7374	0.66441	0.818409
ebi-a-GCST90001916	x9JItO	ad	CD45 on CD4+ T cell	Wald ratio	1	-0.0150267	0.0484731	0.756561	-0.110034	0.0799806	0.985086	0.895804	1.08327
ebi-a-GCST90001919	acfzRD	ad	CD45 on Natural Killer T	Wald ratio	1	-0.00239234	0.0545455	0.965016	-0.109301	0.104517	0.997611	0.89646	1.11017
ebi-a-GCST90001927	Xu9O0E	ad	CD127 on CD8+ T cell	Wald ratio	1	0.00981461	0.0474373	0.836091	-0.0831625	0.102792	1.00986	0.920202	1.10826
ebi-a-GCST90001928	lhEgJS	ad	CD127 on CD28+ CD45RA- CD8+ T cell	Wald ratio	1	-0.0367932	0.0313859	0.241083	-0.0983096	0.0247232	0.963875	0.906368	1.02503
ebi-a-GCST90001929	iR6npH	ad	CD127 on CD28+ CD45RA+ CD8+ T cell	Wald ratio	1	0.156648	0.0503947	0.00188082	0.0578749	0.255422	1.16958	1.05958	1.29101
ebi-a-GCST90001933	C5lRRU	ad	CD25 on CD45RA- CD4 not regulatory T cell	Wald ratio	1	-0.0489122	0.0235564	0.037858	-0.0950826	-0.0027417	0.952265	0.909298	0.997262
ebi-a-GCST90001934	0dM5Ka	ad	CD25 on CD45RA+ CD4 not regulatory T cell	Wald ratio	1	0.0657606	0.039018	0.0919127	-0.0107146	0.142236	1.06797	0.989343	1.15285
ebi-a-GCST90001935	NSxxM2	ad	CD25 on CD39+ CD4 regulatory T cell	Wald ratio	1	-0.0489011	0.0456044	0.28359	-0.138286	0.0404835	0.952275	0.87085	1.04131
ebi-a-GCST90001937	14A7Px	ad	CD25 on resting CD4 regulatory T cell	Wald ratio	1	0.0401619	0.0806351	0.618435	-0.117883	0.198207	1.04098	0.8888	1.21921
ebi-a-GCST90001938	poYuR8	ad	CD25 on CD39+ resting CD4 regulatory T cell	Wald ratio	1	-0.05	0.0639785	0.434501	-0.175398	0.0753978	0.951229	0.839123	1.07831
ebi-a-GCST90001940	fKZjtz	ad	CD25 on CD39+ activated CD4 regulatory T cell	Wald ratio	1	-0.0519253	0.0484247	0.28359	-0.146838	0.0429872	0.9494	0.863434	1.04392
ebi-a-GCST90001941	AErpOt	ad	CD25 on secreting CD4 regulatory T cell	Wald ratio	1	0.0652389	0.0260297	0.0121992	0.0142208	0.116257	1.06741	1.01432	1.12328
ebi-a-GCST90001942	B4wzAE	ad	CD25 on CD39+ secreting CD4 regulatory T cell	Wald ratio	1	0.0666106	0.026577	0.0121992	0.0145198	0.118701	1.06888	1.01463	1.12603
ebi-a-GCST90001943	a4JvqU	ad	CD25 on activated & secreting CD4 regulatory T cell	Wald ratio	1	0.0741573	0.029588	0.0121992	0.0161648	0.13215	1.07698	1.0163	1.14128
ebi-a-GCST90001958	U3mEDM	ad	CD4 on monocyte	Wald ratio	1	0.0304775	0.0358957	0.39585	-0.0398781	0.100833	1.03095	0.960907	1.10609
ebi-a-GCST90001960	pdsdg3	ad	CD25 on CD4+ T cell	Wald ratio	1	-0.0774611	0.0373057	0.037858	-0.15058	-0.00434197	0.925463	0.860209	0.995667
ebi-a-GCST90001966	xu7ENh	ad	FSC-A on granulocyte	Wald ratio	1	0.0661453	0.0290503	0.0227908	0.0092067	0.123084	1.06838	1.00925	1.13098
ebi-a-GCST90001967	yxlogT	ad	FSC-A on CD14+ monocyte	Wald ratio	1	0.00456343	0.0775783	0.953093	-0.14749	0.156617	1.00457	0.862871	1.16955
ebi-a-GCST90001974	0jxY9K	ad	FSC-A on CD8+ T cell	Wald ratio	1	0.0480329	0.0933211	0.606759	-0.134876	0.230942	1.04921	0.873824	1.25979
ebi-a-GCST90001986	KnFeQl	ad	CD14 on CD14+ CD16- monocyte	Wald ratio	1	-0.0165959	0.0374373	0.65755	-0.089973	0.0567812	0.983541	0.913956	1.05842
ebi-a-GCST90001990	Zv2HjA	ad	CD64 on CD14- CD16+ monocyte	Wald ratio	1	0.0118508	0.0630882	0.850998	-0.111802	0.135504	1.01192	0.894221	1.14511
ebi-a-GCST90001992	9UwjYG	ad	CCR2 on CD14+ CD16+ monocyte	Wald ratio	1	-0.0871692	0.0693326	0.208659	-0.223061	0.0487227	0.916522	0.800066	1.04993
ebi-a-GCST90001993	Ok86HE	ad	PDL-1 on CD14+ CD16- monocyte	Wald ratio	1	0.0338066	0.0601758	0.574254	-0.0841379	0.151751	1.03438	0.919304	1.16387
ebi-a-GCST90001994	tlH53S	ad	CX3CR1 on CD14- CD16-	Wald ratio	1	0.157704	0.0519637	0.00240628	0.055855	0.259553	1.17082	1.05744	1.29635
ebi-a-GCST90001998	epdYTE	ad	PDL-1 on CD14+ CD16+ monocyte	Wald ratio	1	0.071231	0.0560166	0.203514	-0.0385615	0.181024	1.07383	0.962172	1.19844
ebi-a-GCST90001999	2zLTfF	ad	PDL-1 on CD14- CD16+ monocyte	Wald ratio	1	-0.0425262	0.0224394	0.058071	-0.0865074	0.00145494	0.958365	0.917129	1.00146
ebi-a-GCST90002000	8VYDnQ	ad	PDL-1 on CD14- CD16-	Wald ratio	1	-0.00178763	0.0589918	0.975825	-0.117412	0.113836	0.998214	0.889219	1.12057
ebi-a-GCST90002018	odPbrF	ad	CCR2 on granulocyte	Wald ratio	1	0.104742	0.0460014	0.0227908	0.0145789	0.194904	1.11042	1.01469	1.21519
ebi-a-GCST90002019	wHuYKU	ad	CD14 on Monocytic Myeloid-Derived Suppressor Cells	Wald ratio	1	0.0310054	0.0291993	0.288301	-0.0262252	0.088236	1.03149	0.974116	1.09225
ebi-a-GCST90002021	2yxD3v	ad	CD14 on CD33dim HLA DR+ CD11b+	Wald ratio	1	-0.0304824	0.0239716	0.203514	-0.0774667	0.0165019	0.969978	0.925458	1.01664
ebi-a-GCST90002023	dmIpTO	ad	CD4 on Central Memory CD4+ T cell	Wald ratio	1	-0.0280343	0.0296834	0.344943	-0.0862137	0.0301451	0.972355	0.917398	1.0306
ebi-a-GCST90002027	BoiuSj	ad	CD4 on CD45RA+ CD4+ T cell	Wald ratio	1	-0.0260417	0.0275735	0.344943	-0.0800858	0.0280025	0.974294	0.923037	1.0284
ebi-a-GCST90002042	2AHKJT	ad	CD45 on CD33+ HLA DR+ CD14-	Wald ratio	1	0.0239159	0.0454665	0.59888	-0.0651984	0.11303	1.0242	0.936882	1.11967
ebi-a-GCST90002046	JGbx2p	ad	CD45 on CD33- HLA DR+	Wald ratio	1	-0.135157	0.0364645	0.00021	-0.206627	-0.0636861	0.873579	0.813323	0.938299
ebi-a-GCST90002057	a9UNGh	ad	CD8 on Terminally Differentiated CD8+ T cell	Wald ratio	1	-0.0184822	0.0238029	0.437471	-0.0651358	0.0281714	0.981688	0.93694	1.02857
ebi-a-GCST90002058	YpOCjn	ad	CD8 on CD8+ T cell	Wald ratio	1	0.0315627	0.021555	0.143116	-0.0106851	0.0738106	1.03207	0.989372	1.0766
ebi-a-GCST90002059	24yskN	ad	CD8 on Natural Killer T	Wald ratio	1	-0.16048	0.0491148	0.00108524	-0.256745	-0.0642147	0.851735	0.773566	0.937804
ebi-a-GCST90002063	PCMB7i	ad	CD4 on CD4 regulatory T cell	Wald ratio	1	-0.0351676	0.0372362	0.344943	-0.108151	0.0378155	0.965444	0.897492	1.03854
ebi-a-GCST90002064	XDRYiS	ad	CD4 on resting CD4 regulatory T cell	Wald ratio	1	-0.0460206	0.0487277	0.344943	-0.141527	0.0494857	0.955022	0.868032	1.05073
ebi-a-GCST90002065	1okwYZ	ad	CD4 on CD39+ resting CD4 regulatory T cell	Wald ratio	1	0.0819452	0.0513165	0.110297	-0.0186351	0.182526	1.0854	0.981537	1.20024
ebi-a-GCST90002066	TRZtVW	ad	CD4 on activated CD4 regulatory T cell	Wald ratio	1	-0.034288	0.036305	0.344943	-0.105446	0.0368697	0.966293	0.899923	1.03756
ebi-a-GCST90002068	QAzwYE	ad	CD4 on secreting CD4 regulatory T cell	Wald ratio	1	-0.0415445	0.0439883	0.344943	-0.127761	0.0446725	0.959307	0.880063	1.04569
ebi-a-GCST90002070	YjfqD9	ad	CD4 on activated & secreting CD4 regulatory T cell	Wald ratio	1	-0.0359104	0.0380228	0.344943	-0.110435	0.0386143	0.964727	0.895444	1.03937
ebi-a-GCST90002076	Vw9SVU	ad	SSC-A on Natural Killer	Wald ratio	1	-0.0156853	0.0306467	0.608783	-0.0757529	0.0443822	0.984437	0.927045	1.04538
ebi-a-GCST90002079	N0XpMO	ad	SSC-A on lymphocyte	Wald ratio	1	-0.00596303	0.0506857	0.906347	-0.105307	0.093381	0.994055	0.900048	1.09788
ebi-a-GCST90002080	Xvp2Gf	ad	SSC-A on T cell	Wald ratio	1	-0.0647303	0.0670124	0.334072	-0.196075	0.0666141	0.93732	0.821951	1.06888
ebi-a-GCST90002088	kN2Ke1	ad	CD11c on CD62L+ myeloid Dendritic Cell	Wald ratio	1	0.064802	0.02437	0.00783518	0.0170368	0.112567	1.06695	1.01718	1.11915
ebi-a-GCST90002091	XdnTBS	ad	CD11b on CD14+ monocyte	Wald ratio	1	0.0165064	0.0129808	0.203514	-0.0089359	0.0419487	1.01664	0.991104	1.04284
ebi-a-GCST90002094	GpxfK7	ad	CD11b on Monocytic Myeloid-Derived Suppressor Cells	Wald ratio	1	0.0223427	0.0175705	0.203514	-0.0120954	0.0567809	1.02259	0.987977	1.05842
ebi-a-GCST90002095	snXjMB	ad	CD11b on CD33dim HLA DR-	Wald ratio	1	-0.0148266	0.024635	0.547273	-0.0631113	0.033458	0.985283	0.938839	1.03402
ebi-a-GCST90002096	ig9zJj	ad	CD11b on basophil	Wald ratio	1	-0.0143933	0.023915	0.547273	-0.0612666	0.0324801	0.98571	0.940572	1.03301
ebi-a-GCST90002097	rhOtCw	ad	CD11b on CD33+ HLA DR+ CD14dim	Wald ratio	1	0.020846	0.0163934	0.203514	-0.0112852	0.0529771	1.02106	0.988778	1.05441
ebi-a-GCST90002101	pcbTOf	ad	CD45RA on Terminally Differentiated CD8+ T cell	Wald ratio	1	0.0693261	0.0549961	0.207466	-0.0384663	0.177119	1.07179	0.962264	1.19377
ebi-a-GCST90002113	fUTW5r	ad	HLA DR on HLA DR+ T cell	Wald ratio	1	0.080148	0.0369914	0.0302603	0.00764488	0.152651	1.08345	1.00767	1.16492
ebi-a-GCST90002114	xtCjiu	ad	HLA DR on HLA DR+ CD4+ T cell	Wald ratio	1	0.116487	0.0537634	0.0302603	0.0111111	0.221864	1.12354	1.01117	1.2484
ebi-a-GCST90001399	Ure4zi	ad	IgD- CD27- B cell %B cell	Weighted median	3	0.00726231	0.0224037	0.745819	-0.0366489	0.0511735	1.00729	0.964015	1.05251
ebi-a-GCST90001417	WXoBE0	ad	CD24+ CD27+ B cell %B cell	Weighted median	3	0.100589	0.0497804	0.0433149	0.0030197	0.198159	1.10582	1.00302	1.21916
ebi-a-GCST90001432	7MpxWk	ad	Unswitched memory B cell %lymphocyte	Weighted median	3	-0.0345069	0.0596977	0.563245	-0.151514	0.0825006	0.966082	0.859405	1.086
ebi-a-GCST90001434	Axw6QC	ad	Switched memory B cell %lymphocyte	Weighted median	3	-0.0832682	0.0477237	0.0810199	-0.176807	0.0102702	0.920104	0.837942	1.01032
ebi-a-GCST90001442	erehYt	ad	CD24+ CD27+ B cell %lymphocyte	Weighted median	3	0.125321	0.0753287	0.0961816	-0.0223234	0.272965	1.13351	0.977924	1.31385
ebi-a-GCST90001450	lFzJXO	ad	CD62L- monocyte Absolute Count	Weighted median	4	0.0115803	0.0330442	0.726001	-0.0531862	0.0763469	1.01165	0.948203	1.07934
ebi-a-GCST90001451	fbksmE	ad	CD62L- monocyte %monocyte	Weighted median	3	0.00556016	0.0229978	0.808959	-0.0395156	0.0506359	1.00558	0.961255	1.05194
ebi-a-GCST90001458	YG2GQg	ad	Myeloid Dendritic Cell Absolute Count	Weighted median	5	0.0226596	0.0175929	0.197749	-0.0118226	0.0571417	1.02292	0.988247	1.05881
ebi-a-GCST90001462	NY4XdH	ad	CD62L- Dendritic Cell Absolute Count	Weighted median	4	0.0233405	0.0162215	0.15019	-0.00845365	0.0551347	1.02362	0.991582	1.05668
ebi-a-GCST90001463	qIqsZF	ad	CD62L- Dendritic Cell %Dendritic Cell	Weighted median	3	-0.0491768	0.0399598	0.218451	-0.127498	0.0291444	0.952013	0.880295	1.02957
ebi-a-GCST90001464	8VmkKc	ad	CD86+ myeloid Dendritic Cell Absolute Count	Weighted median	4	0.0258737	0.0144037	0.0724429	-0.00235753	0.0541049	1.02621	0.997645	1.0556
ebi-a-GCST90001465	3E78En	ad	CD86+ myeloid Dendritic Cell %Dendritic Cell	Weighted median	4	0.0289629	0.0149372	0.0525039	-0.000314	0.0582398	1.02939	0.999686	1.05997
ebi-a-GCST90001468	VomKYe	ad	CD62L- myeloid Dendritic Cell Absolute Count	Weighted median	6	0.0209798	0.0147118	0.153855	-0.00785543	0.049815	1.0212	0.992175	1.05108
ebi-a-GCST90001469	4FtSit	ad	CD62L- myeloid Dendritic Cell %Dendritic Cell	Weighted median	7	0.0138365	0.0147292	0.347532	-0.0150329	0.0427058	1.01393	0.98508	1.04363
ebi-a-GCST90001471	A1tSgF	ad	CD62L- plasmacytoid Dendritic Cell %Dendritic Cell	Weighted median	3	-0.0266918	0.026395	0.3119	-0.0784259	0.0250424	0.973661	0.924571	1.02536
ebi-a-GCST90001472	oGolpf	ad	CD62L- CD86+ myeloid Dendritic Cell Absolute Count	Weighted median	5	0.0150208	0.013177	0.254318	-0.0108061	0.0408477	1.01513	0.989252	1.04169
ebi-a-GCST90001473	a8ZHVl	ad	CD62L- CD86+ myeloid Dendritic Cell %Dendritic Cell	Weighted median	6	0.0102433	0.013221	0.438472	-0.0156698	0.0361564	1.0103	0.984452	1.03682
ebi-a-GCST90001475	bdWjjD	ad	HLA DR++ monocyte %monocyte	Weighted median	3	-0.0809344	0.0247171	0.00105877	-0.12938	-0.0324888	0.922254	0.87864	0.968033
ebi-a-GCST90001480	g7H8xO	ad	Resting CD4 regulatory T cell Absolute Count	Weighted median	6	0.0139494	0.0122588	0.255157	-0.0100778	0.0379766	1.01405	0.989973	1.03871
ebi-a-GCST90001481	cgQ95v	ad	Resting CD4 regulatory T cell %CD4 regulatory T cell	Weighted median	15	0.0157422	0.00692464	0.0230043	0.00216993	0.0293145	1.01587	1.00217	1.02975
ebi-a-GCST90001482	zi7rhx	ad	Resting CD4 regulatory T cell %CD4+ T cell	Weighted median	10	0.0177792	0.00840473	0.0343975	0.00130593	0.0342525	1.01794	1.00131	1.03485
ebi-a-GCST90001483	mLpXYj	ad	CD39+ resting CD4 regulatory T cell Absolute Count	Weighted median	18	0.00889884	0.00916877	0.331767	-0.00907194	0.0268696	1.00894	0.990969	1.02723
ebi-a-GCST90001484	C4f0zM	ad	CD39+ resting CD4 regulatory T cell %resting CD4 regulatory T cell	Weighted median	15	0.016699	0.00842302	0.047419	0.00019	0.0332081	1.01684	1.00019	1.03377
ebi-a-GCST90001485	Jm1uoi	ad	CD39+ resting CD4 regulatory T cell %CD4 regulatory T cell	Weighted median	22	0.0221093	0.00677026	0.00109214	0.00883957	0.035379	1.02236	1.00888	1.03601
ebi-a-GCST90001486	uOTe3c	ad	Activated CD4 regulatory T cell Absolute Count	Weighted median	3	-0.0339084	0.0178232	0.0571081	-0.068842	0.00102515	0.96666	0.933474	1.00103
ebi-a-GCST90001487	eAPiZv	ad	Activated CD4 regulatory T cell %CD4 regulatory T cell	Weighted median	5	-0.0102306	0.0129402	0.429174	-0.0355934	0.0151322	0.989822	0.965033	1.01525
ebi-a-GCST90001489	CvSRlD	ad	CD39+ activated CD4 regulatory T cell Absolute Count	Weighted median	13	0.0208755	0.00888206	0.0187586	0.00346662	0.0382843	1.02109	1.00347	1.03903
ebi-a-GCST90001491	WqLxa5	ad	CD39+ activated CD4 regulatory T cell %CD4 regulatory T cell	Weighted median	12	0.0203103	0.00836608	0.0151948	0.00391283	0.0367079	1.02052	1.00392	1.03739
ebi-a-GCST90001492	H7Dc2t	ad	Secreting CD4 regulatory T cell Absolute Count	Weighted median	6	-0.0291059	0.0108184	0.00713666	-0.05031	-0.00790176	0.971314	0.950935	0.992129
ebi-a-GCST90001493	1UQy5C	ad	Secreting CD4 regulatory T cell %CD4 regulatory T cell	Weighted median	11	-0.0236721	0.00737523	0.00132881	-0.0381276	-0.0092167	0.976606	0.96259	0.990826
ebi-a-GCST90001494	FXLdfU	ad	Secreting CD4 regulatory T cell %CD4+ T cell	Weighted median	10	-0.0247709	0.00866587	0.00425718	-0.041756	-0.00778584	0.975533	0.959104	0.992244
ebi-a-GCST90001495	ZsQiEt	ad	CD39+ secreting CD4 regulatory T cell Absolute Count	Weighted median	16	0.0184737	0.00799431	0.0208409	0.00280483	0.0341425	1.01865	1.00281	1.03473
ebi-a-GCST90001496	5zt7zw	ad	CD39+ secreting CD4 regulatory T cell %secreting CD4 regulatory T cell	Weighted median	14	-0.0010328	0.018086	0.954462	-0.0364815	0.0344159	0.998968	0.964176	1.03501
ebi-a-GCST90001497	PBUuH6	ad	CD39+ secreting CD4 regulatory T cell %CD4 regulatory T cell	Weighted median	13	-0.000895	0.0172476	0.958609	-0.0347005	0.0329102	0.999105	0.965895	1.03346
ebi-a-GCST90001499	c4hqeu	ad	Activated & resting CD4 regulatory T cell %CD4 regulatory T cell	Weighted median	11	0.0234968	0.00754078	0.00183343	0.0087169	0.0382768	1.02378	1.00876	1.03902
ebi-a-GCST90001500	lmswJj	ad	Activated & resting CD4 regulatory T cell %CD4+ T cell	Weighted median	6	0.0126833	0.0116358	0.275704	-0.0101229	0.0354895	1.01276	0.989928	1.03613
ebi-a-GCST90001501	B8bF2c	ad	Activated & secreting CD4 regulatory T cell Absolute Count	Weighted median	6	-0.0249061	0.0102095	0.0147073	-0.0449167	-0.00489552	0.975401	0.956077	0.995116
ebi-a-GCST90001502	RSG0Vb	ad	Activated & secreting CD4 regulatory T cell %CD4 regulatory T cell	Weighted median	15	-0.0229619	0.00720426	0.00143626	-0.0370822	-0.00884152	0.9773	0.963597	0.991197
ebi-a-GCST90001503	ZIMebt	ad	Activated & secreting CD4 regulatory T cell %CD4+ T cell	Weighted median	11	-0.0222056	0.00845821	0.00865661	-0.0387837	-0.00562747	0.978039	0.961959	0.994388
ebi-a-GCST90001507	o5PdKm	ad	CD25++ CD45RA+ CD4 not regulatory T cell Absolute Count	Weighted median	6	0.0194266	0.0103042	0.0593868	-0.00077	0.0396228	1.01962	0.999231	1.04042
ebi-a-GCST90001508	4yUDad	ad	CD25++ CD45RA+ CD4 not regulatory T cell %CD4+ T cell	Weighted median	9	0.0209922	0.00906049	0.0205091	0.0032337	0.0387508	1.02121	1.00324	1.03951
ebi-a-GCST90001509	vamPqZ	ad	CD25++ CD45RA+ CD4 not regulatory T cell %T cell	Weighted median	8	0.0190994	0.00989202	0.053509	-0.000289	0.0384878	1.01928	0.999711	1.03924
ebi-a-GCST90001510	YUP1j0	ad	CD25++ CD45RA- CD4 not regulatory T cell Absolute Count	Weighted median	4	-0.0366733	0.0147031	0.0126223	-0.0654914	-0.00785516	0.963991	0.936607	0.992176
ebi-a-GCST90001511	pdwNGn	ad	CD25++ CD45RA- CD4 not regulatory T cell %CD4+ T cell	Weighted median	6	-0.0356167	0.0112331	0.00152071	-0.0576335	-0.0135999	0.96501	0.943996	0.986492
ebi-a-GCST90001512	37xpFN	ad	CD25++ CD45RA- CD4 not regulatory T cell %T cell	Weighted median	5	-0.0409425	0.0128801	0.00147918	-0.0661876	-0.0156975	0.959884	0.935955	0.984425
ebi-a-GCST90001514	60Q6a7	ad	Hematopoietic Stem Cell Absolute Count	Weighted median	3	0.0180845	0.0173029	0.295945	-0.0158292	0.0519982	1.01825	0.984295	1.05337
ebi-a-GCST90001530	QrMnyU	ad	Monocytic Myeloid-Derived Suppressor Cells Absolute Count	Weighted median	4	0.0511424	0.0162535	0.00165214	0.0192855	0.0829994	1.05247	1.01947	1.08654
ebi-a-GCST90001532	WwjAjA	ad	Basophil Absolute Count	Weighted median	3	0.0106562	0.0104872	0.309576	-0.00989875	0.0312111	1.01071	0.99015	1.0317
ebi-a-GCST90001533	tpuwaW	ad	Basophil %CD33dim HLA DR- CD66b-	Weighted median	3	0.0534273	0.0169408	0.00161177	0.0202234	0.0866313	1.05488	1.02043	1.09049
ebi-a-GCST90001535	mC0NXX	ad	CD45RA- CD4+ T cell %CD4+ T cell	Weighted median	6	-0.0298685	0.0129039	0.0206304	-0.0551601	-0.00457678	0.970573	0.946334	0.995434
ebi-a-GCST90001536	OD6kJq	ad	CD45RA- CD4+ T cell %T cell	Weighted median	4	-0.0270658	0.0163063	0.0969479	-0.0590261	0.0048946	0.973297	0.942682	1.00491
ebi-a-GCST90001544	4XYWiY	ad	Effector Memory CD4+ T cell %T cell	Weighted median	4	-0.0203085	0.0177024	0.251291	-0.0550052	0.0143882	0.979896	0.94648	1.01449
ebi-a-GCST90001546	vsmitp	ad	Terminally Differentiated CD4+ T cell %CD4+ T cell	Weighted median	3	0.0580049	0.0270511	0.032011	0.00498479	0.111025	1.05972	1.005	1.11742
ebi-a-GCST90001547	2TwTQI	ad	Terminally Differentiated CD4+ T cell %T cell	Weighted median	4	0.0187567	0.0228528	0.411781	-0.0260347	0.0635481	1.01893	0.974301	1.06561
ebi-a-GCST90001555	LzwxTZ	ad	Effector Memory CD8+ T cell %CD8+ T cell	Weighted median	6	-0.00993095	0.0123332	0.420691	-0.0341039	0.014242	0.990118	0.966471	1.01434
ebi-a-GCST90001558	xuadsh	ad	Terminally Differentiated CD8+ T cell %CD8+ T cell	Weighted median	5	0.0201683	0.01399	0.14941	-0.00725218	0.0475887	1.02037	0.992774	1.04874
ebi-a-GCST90001560	usThBK	ad	CD45RA+ CD8+ T cell Absolute Count	Weighted median	3	0.0118363	0.0429409	0.782824	-0.072328	0.0960005	1.01191	0.930226	1.10076
ebi-a-GCST90001561	Z0G3iE	ad	CD45RA+ CD8+ T cell %CD8+ T cell	Weighted median	7	0.0107171	0.008594	0.212379	-0.00612709	0.0275614	1.01077	0.993892	1.02794
ebi-a-GCST90001562	fGgyZ4	ad	CD45RA+ CD8+ T cell %T cell	Weighted median	4	0.0323403	0.0205304	0.115202	-0.00789936	0.0725799	1.03287	0.992132	1.07528
ebi-a-GCST90001569	TdECnO	ad	Effector Memory CD4-CD8- T cell Absolute Count	Weighted median	4	-0.0257206	0.0379357	0.497769	-0.100075	0.0486334	0.974607	0.90477	1.04984
ebi-a-GCST90001570	sP6CaK	ad	Effector Memory CD4-CD8- T cell %CD4-CD8- T cell	Weighted median	4	-0.0163902	0.0128482	0.202066	-0.0415726	0.00879213	0.983743	0.95928	1.00883
ebi-a-GCST90001571	R9ufP9	ad	Effector Memory CD4-CD8- T cell %T cell	Weighted median	4	-0.0729785	0.0364456	0.0452422	-0.144412	-0.00154513	0.929621	0.865531	0.998456
ebi-a-GCST90001573	puZeuK	ad	Terminally Differentiated CD4-CD8- T cell %CD4-CD8- T cell	Weighted median	3	0.0170614	0.0130731	0.191868	-0.00856197	0.0426848	1.01721	0.991475	1.04361
ebi-a-GCST90001574	rjPTCU	ad	Terminally Differentiated CD4-CD8- T cell %T cell	Weighted median	4	-0.00689591	0.0206715	0.738685	-0.047412	0.0336202	0.993128	0.953694	1.03419
ebi-a-GCST90001581	JaYMBL	ad	CD14- CD16- Absolute Count	Weighted median	3	0.0142652	0.0356798	0.689296	-0.0556672	0.0841975	1.01437	0.945854	1.08784
ebi-a-GCST90001582	zjbOyn	ad	CD14+ CD16- monocyte Absolute Count	Weighted median	3	-0.0186373	0.0437695	0.670249	-0.104426	0.0671509	0.981535	0.900842	1.06946
ebi-a-GCST90001592	3MO8rE	ad	CD8+ T cell Absolute Count	Weighted median	3	0.0114518	0.0347725	0.741903	-0.0567023	0.0796059	1.01152	0.944875	1.08286
ebi-a-GCST90001596	wKWIUN	ad	CD8dim T cell Absolute Count	Weighted median	4	0.0194083	0.0387497	0.616467	-0.0565411	0.0953577	1.0196	0.945028	1.10005
ebi-a-GCST90001597	Q4qTY6	ad	CD8dim T cell %T cell	Weighted median	3	0.0200026	0.0349539	0.567148	-0.048507	0.0885123	1.0202	0.952651	1.09255
ebi-a-GCST90001599	7sy6SK	ad	CD4-CD8- T cell %T cell	Weighted median	3	-0.0376179	0.039292	0.338369	-0.11463	0.0393944	0.963081	0.891696	1.04018
ebi-a-GCST90001612	fRFj0i	ad	CD8dim T cell %leukocyte	Weighted median	3	0.0213478	0.0377074	0.571295	-0.0525586	0.0952543	1.02158	0.948799	1.09994
ebi-a-GCST90001613	nOIUPn	ad	CD4-CD8- T cell %leukocyte	Weighted median	4	-0.00888368	0.0357869	0.80395	-0.0790261	0.0612587	0.991156	0.924016	1.06317
ebi-a-GCST90001614	RFS3VV	ad	CD8+ and CD8dim T cell %leukocyte	Weighted median	3	-0.0507981	0.0482073	0.292	-0.145284	0.0436882	0.950471	0.864776	1.04466
ebi-a-GCST90001618	yLtqVh	ad	HLA DR+ T cell Absolute Count	Weighted median	4	-0.0224459	0.020196	0.266394	-0.0620301	0.0171382	0.977804	0.939855	1.01729
ebi-a-GCST90001619	OT2s1U	ad	HLA DR+ T cell%T cell	Weighted median	3	-0.0269099	0.0188611	0.153654	-0.0638777	0.0100578	0.973449	0.93812	1.01011
ebi-a-GCST90001620	XPhmnP	ad	HLA DR+ T cell%lymphocyte	Weighted median	4	-0.0286422	0.018355	0.118652	-0.064618	0.00733362	0.971764	0.937425	1.00736
ebi-a-GCST90001621	SkfGaX	ad	Natural Killer T Absolute Count	Weighted median	6	-0.0016199	0.0358829	0.963993	-0.0719504	0.0687106	0.998381	0.930577	1.07113
ebi-a-GCST90001622	taPnxW	ad	Natural Killer T %T cell	Weighted median	7	0.0155781	0.0291096	0.592543	-0.0414766	0.0726328	1.0157	0.959372	1.07534
ebi-a-GCST90001623	TyWwZb	ad	Natural Killer T %lymphocyte	Weighted median	8	0.0351684	0.0268825	0.190797	-0.0175214	0.0878581	1.03579	0.982631	1.09183
ebi-a-GCST90001627	FvjD0X	ad	HLA DR+ CD8+ T cell Absolute Count	Weighted median	3	-0.0285162	0.0207896	0.17017	-0.0692639	0.0122314	0.971887	0.93308	1.01231
ebi-a-GCST90001628	CZnCbS	ad	HLA DR+ CD8+ T cell %T cell	Weighted median	3	-0.0297	0.0199464	0.136491	-0.068795	0.00939501	0.970737	0.933518	1.00944
ebi-a-GCST90001633	WMki1I	ad	CD8dim Natural Killer T Absolute Count	Weighted median	7	0.00058	0.0260059	0.982204	-0.0503915	0.0515517	1.00058	0.950857	1.0529
ebi-a-GCST90001634	c5ihPF	ad	CD8dim Natural Killer T %T cell	Weighted median	7	-0.00233756	0.0244908	0.92396	-0.0503396	0.0456645	0.997665	0.950906	1.04672
ebi-a-GCST90001635	Qz4jAp	ad	CD8dim Natural Killer T %lymphocyte	Weighted median	8	0.00545871	0.0247515	0.82545	-0.0430542	0.0539716	1.00547	0.957859	1.05545
ebi-a-GCST90001637	SkjLbo	ad	CD4-CD8- Natural Killer T %T cell	Weighted median	8	-0.0087004	0.0255469	0.733431	-0.0587724	0.0413716	0.991337	0.942921	1.04224
ebi-a-GCST90001638	iZokvF	ad	CD4-CD8- Natural Killer T %lymphocyte	Weighted median	8	-0.00732169	0.0252412	0.771764	-0.0567945	0.0421511	0.992705	0.944788	1.04305
ebi-a-GCST90001643	sX3IRp	ad	B cell %CD3- lymphocyte	Weighted median	3	0.00339452	0.0139256	0.807416	-0.0238997	0.0306888	1.0034	0.976384	1.03116
ebi-a-GCST90001645	i9oIQ2	ad	Natural Killer Absolute Count	Weighted median	3	-0.0352555	0.0325427	0.278648	-0.0990392	0.0285282	0.965359	0.905707	1.02894
ebi-a-GCST90001646	UwptDb	ad	Natural Killer %CD3- lymphocyte	Weighted median	5	-0.00364399	0.0139992	0.794632	-0.0310823	0.0237944	0.996363	0.969396	1.02408
ebi-a-GCST90001647	zL0NOo	ad	Natural Killer %lymphocyte	Weighted median	3	-0.0267997	0.0268565	0.318336	-0.0794384	0.0258391	0.973556	0.923635	1.02618
ebi-a-GCST90001648	9hUFdp	ad	HLA DR+ Natural Killer Absolute Count	Weighted median	3	-0.027048	0.0170332	0.112295	-0.060433	0.00633696	0.973314	0.941357	1.00636
ebi-a-GCST90001649	yQSMZ4	ad	HLA DR+ Natural Killer %Natural Killer	Weighted median	5	-0.0266521	0.0165504	0.107319	-0.0590908	0.00578665	0.9737	0.942621	1.0058
ebi-a-GCST90001650	tyeslR	ad	HLA DR+ Natural Killer %CD3- lymphocyte	Weighted median	4	-0.032608	0.0167713	0.0518624	-0.0654797	0.000264	0.967918	0.936618	1.00026
ebi-a-GCST90001658	Krwzz5	ad	CD39+ CD4+ T cell %T cell	Weighted median	17	-0.0147494	0.0160494	0.358094	-0.0462062	0.0167074	0.985359	0.954845	1.01685
ebi-a-GCST90001659	BKpbIM	ad	CD39+ CD4+ T cell %CD4+ T cell	Weighted median	15	-0.00808734	0.016588	0.625874	-0.0405997	0.0244251	0.991945	0.960213	1.02473
ebi-a-GCST90001660	pP5Dcn	ad	CD39+ CD4+ T cell Absolute Count	Weighted median	17	-0.011307	0.0156375	0.469635	-0.0419565	0.0193424	0.988757	0.958911	1.01953
ebi-a-GCST90001661	ZNm3YD	ad	CD28- CD8dim T cell %T cell	Weighted median	3	0.0954868	0.0445255	0.0319896	0.00821678	0.182757	1.10019	1.00825	1.20052
ebi-a-GCST90001664	yhX3Ox	ad	CD28+ CD45RA+ CD8dim T cell %T cell	Weighted median	8	0.0176329	0.0105992	0.0961913	-0.00314154	0.0384073	1.01779	0.996863	1.03915
ebi-a-GCST90001665	wSlFn2	ad	CD28+ CD45RA+ CD8dim T cell %CD8dim T cell	Weighted median	7	0.0158525	0.0101355	0.117806	-0.00401316	0.0357181	1.01598	0.995995	1.03636
ebi-a-GCST90001666	H2AkZd	ad	CD28+ CD45RA+ CD8dim T cell Absolute Count	Weighted median	8	0.000339	0.00673603	0.959907	-0.012864	0.0135412	1.00034	0.987218	1.01363
ebi-a-GCST90001667	EslJm1	ad	CD28+ CD45RA- CD8dim T cell %T cell	Weighted median	4	-0.0169306	0.0106484	0.111842	-0.0378014	0.00394025	0.983212	0.962904	1.00395
ebi-a-GCST90001668	StXSda	ad	CD28+ CD45RA- CD8dim T cell %CD8dim T cell	Weighted median	3	-0.0178142	0.0122122	0.144644	-0.0417501	0.00612182	0.982344	0.959109	1.00614
ebi-a-GCST90001669	Q0WfNi	ad	CD28+ CD45RA- CD8dim T cell Absolute Count	Weighted median	4	-0.0211942	0.0112258	0.0590267	-0.0431968	0.000808	0.979029	0.957723	1.00081
ebi-a-GCST90001670	UavKZX	ad	CD39+ CD8+ T cell %T cell	Weighted median	20	-0.0363436	0.0165282	0.0278859	-0.0687388	-0.00394838	0.964309	0.93357	0.996059
ebi-a-GCST90001671	ExZWJp	ad	CD39+ CD8+ T cell %CD8+ T cell	Weighted median	16	-0.0408892	0.0170528	0.0164936	-0.0743127	-0.00746581	0.959935	0.928381	0.992562
ebi-a-GCST90001672	lHSzKD	ad	CD39+ CD8+ T cell Absolute Count	Weighted median	21	-0.0393139	0.0163101	0.0159348	-0.0712817	-0.00734616	0.961449	0.9312	0.992681
ebi-a-GCST90001681	EvJJ4d	ad	CD25++ CD8+ T cell Absolute Count	Weighted median	3	-0.0095631	0.0258571	0.711498	-0.060243	0.0411168	0.990482	0.941536	1.04197
ebi-a-GCST90001686	KoHNTO	ad	CD28- CD8+ T cell %CD8+ T cell	Weighted median	4	0.0759206	0.0417921	0.0692744	-0.00599189	0.157833	1.07888	0.994026	1.17097
ebi-a-GCST90001687	IGqHSv	ad	CD28- CD8+ T cell Absolute Count	Weighted median	3	0.00325043	0.0409661	0.936759	-0.077043	0.0835439	1.00326	0.92585	1.08713
ebi-a-GCST90001688	MFiGXg	ad	CD28+ CD45RA+ CD8+ T cell %T cell	Weighted median	33	0.00310358	0.00192646	0.107174	-0.000672	0.00687944	1.00311	0.999328	1.0069
ebi-a-GCST90001691	op7QIN	ad	CD28+ CD45RA- CD8+ T cell %T cell	Weighted median	6	-0.0122521	0.0096654	0.204933	-0.0311962	0.00669213	0.987823	0.969285	1.00671
ebi-a-GCST90001692	L2jPqP	ad	CD28+ CD45RA- CD8+ T cell %CD8+ T cell	Weighted median	6	-0.0232758	0.0109335	0.0332658	-0.0447054	-0.00184622	0.976993	0.956279	0.998155
ebi-a-GCST90001693	OH9M7q	ad	CD28+ CD45RA- CD8+ T cell Absolute Count	Weighted median	4	-0.0191049	0.0117737	0.104659	-0.0421815	0.0039716	0.981076	0.958696	1.00398
ebi-a-GCST90001694	Ri4C9R	ad	CD28- CD4-CD8- T cell %T cell	Weighted median	3	-0.03754	0.0397651	0.345147	-0.11548	0.0403996	0.963156	0.890939	1.04123
ebi-a-GCST90001695	Ghux4b	ad	CD45RA- CD28- CD8+ T cell Absolute Count	Weighted median	131	6.45e-06	1.1e-05	0.558612	-1.52e-05	2.81e-05	1.00001	0.999985	1.00003
ebi-a-GCST90001696	aau4wS	ad	CD45RA- CD28- CD8+ T cell %CD8+ T cell	Weighted median	11	0.000674	0.000461	0.143406	-0.000229	0.00157681	1.00067	0.999771	1.00158
ebi-a-GCST90001697	wvoDUT	ad	CD45RA- CD28- CD8+ T cell %T cell	Weighted median	36	0.00102289	0.000369	0.00557138	0.0003	0.00174614	1.00102	1.0003	1.00175
ebi-a-GCST90001698	NK6OFS	ad	CD45RA+ CD28- CD8+ T cell Absolute Count	Weighted median	540	-2.31e-06	4.5e-06	0.608437	-1.11e-05	6.52e-06	0.999998	0.999989	1.00001
ebi-a-GCST90001700	RLghpz	ad	CD45RA+ CD28- CD8+ T cell %T cell	Weighted median	69	0.000262	0.00019	0.168482	-0.000111	0.000635	1.00026	0.999889	1.00064
ebi-a-GCST90001702	UyR7CG	ad	BAFF-R on CD24+ CD27+ B cell	Weighted median	22	-0.00300673	0.0094803	0.751125	-0.0215881	0.0155746	0.996998	0.978643	1.0157
ebi-a-GCST90001703	sTEWnR	ad	BAFF-R on IgD+ CD24+ B cell	Weighted median	18	-0.00194252	0.00978016	0.842561	-0.0211116	0.0172266	0.998059	0.97911	1.01738
ebi-a-GCST90001704	g2OkhP	ad	BAFF-R on IgD+ CD24- B cell	Weighted median	25	-0.00472372	0.00879401	0.591163	-0.02196	0.0125125	0.995287	0.978279	1.01259
ebi-a-GCST90001705	MGSGAo	ad	BAFF-R on IgD+ CD38- B cell	Weighted median	19	-0.00156056	0.00944537	0.868772	-0.0200735	0.0169524	0.998441	0.980127	1.0171
ebi-a-GCST90001706	Vumo5g	ad	BAFF-R on IgD+ CD38- naive B cell	Weighted median	12	-0.0134818	0.0149916	0.368498	-0.0428654	0.0159018	0.986609	0.95804	1.01603
ebi-a-GCST90001707	IDCSt9	ad	BAFF-R on IgD+ CD38- unswitched memory B cell	Weighted median	14	-0.00233849	0.0092004	0.799362	-0.0203713	0.0156943	0.997664	0.979835	1.01582
ebi-a-GCST90001708	OSYpbN	ad	BAFF-R on IgD+ CD38+ B cell	Weighted median	22	-0.00227569	0.00948337	0.810357	-0.0208631	0.0163117	0.997727	0.979353	1.01645
ebi-a-GCST90001709	4TXFZz	ad	BAFF-R on IgD+ CD38dim B cell	Weighted median	26	-0.00508905	0.00886939	0.566119	-0.0224731	0.012295	0.994924	0.977778	1.01237
ebi-a-GCST90001710	GZ1QSI	ad	BAFF-R on IgD- CD24- B cell	Weighted median	21	-0.00131592	0.0100351	0.895671	-0.0209846	0.0183528	0.998685	0.979234	1.01852
ebi-a-GCST90001711	rO181c	ad	BAFF-R on IgD- CD27- B cell	Weighted median	22	-0.00207909	0.00922705	0.821726	-0.0201641	0.0160059	0.997923	0.980038	1.01613
ebi-a-GCST90001712	pTTNJ3	ad	BAFF-R on IgD- CD38- B cell	Weighted median	23	-0.00154017	0.00972649	0.874182	-0.0206041	0.0175237	0.998461	0.979607	1.01768
ebi-a-GCST90001713	qvPMAY	ad	BAFF-R on IgD- CD38+ B cell	Weighted median	3	-0.0135503	0.0262195	0.605294	-0.0649404	0.0378398	0.986541	0.937123	1.03856
ebi-a-GCST90001715	Rgbbut	ad	BAFF-R on memory B cell	Weighted median	19	-0.00175329	0.00931981	0.850779	-0.0200201	0.0165135	0.998248	0.980179	1.01665
ebi-a-GCST90001716	WmlwfO	ad	BAFF-R on naive-mature B cell	Weighted median	25	-0.0047537	0.00922329	0.606273	-0.0228314	0.013324	0.995258	0.977427	1.01341
ebi-a-GCST90001717	oG6epC	ad	BAFF-R on unswitched memory B cell	Weighted median	19	-0.00217837	0.00927712	0.814356	-0.0203615	0.0160048	0.997824	0.979844	1.01613
ebi-a-GCST90001718	ArmzsW	ad	BAFF-R on switched memory B cell	Weighted median	23	-0.00183787	0.00940463	0.845063	-0.020271	0.0165952	0.998164	0.979933	1.01673
ebi-a-GCST90001719	hizsJo	ad	BAFF-R on IgD+ B cell	Weighted median	25	-0.0045577	0.00894732	0.610477	-0.0220944	0.012979	0.995453	0.978148	1.01306
ebi-a-GCST90001720	UkK0i7	ad	BAFF-R on transitional B cell	Weighted median	17	-0.00349635	0.00999827	0.726567	-0.023093	0.0161003	0.99651	0.977172	1.01623
ebi-a-GCST90001724	rcSXY5	ad	CD19 on IgD+ CD24+ B cell	Weighted median	3	0.0269331	0.04742	0.570056	-0.0660101	0.119876	1.0273	0.936121	1.12736
ebi-a-GCST90001725	mbMbrU	ad	CD19 on IgD+ CD24- B cell	Weighted median	3	0.0244662	0.0461586	0.59608	-0.0660047	0.114937	1.02477	0.936127	1.1218
ebi-a-GCST90001728	ra8uOq	ad	CD19 on IgD+ CD38- unswitched memory B cell	Weighted median	3	0.00147706	0.0353726	0.966692	-0.0678533	0.0708074	1.00148	0.934398	1.07337
ebi-a-GCST90001729	XSC2g4	ad	CD19 on IgD+ CD38+ B cell	Weighted median	5	-0.0060581	0.0206208	0.768922	-0.046475	0.0343588	0.99396	0.954588	1.03496
ebi-a-GCST90001730	ksHgIT	ad	CD19 on IgD+ CD38dim B cell	Weighted median	3	0.00367329	0.0434017	0.932552	-0.0813941	0.0887406	1.00368	0.92183	1.0928
ebi-a-GCST90001738	DC0cEY	ad	CD19 on unswitched memory B cell	Weighted median	3	0.00252186	0.0465131	0.956761	-0.0886438	0.0936875	1.00253	0.915172	1.09822
ebi-a-GCST90001742	lYtTiw	ad	CD19 on transitional B cell	Weighted median	3	0.00453358	0.0442264	0.918353	-0.0821501	0.0912172	1.00454	0.921134	1.09551
ebi-a-GCST90001743	DyL8uW	ad	CD20 on B cell	Weighted median	3	-0.00436045	0.0355109	0.902272	-0.0739618	0.0652409	0.995649	0.928707	1.06742
ebi-a-GCST90001745	LFPYca	ad	CD20 on CD24+ CD27+ B cell	Weighted median	4	0.0637245	0.0278981	0.0223606	0.00904417	0.118405	1.0658	1.00909	1.1257
ebi-a-GCST90001747	125171	ad	CD20 on IgD+ CD24- B cell	Weighted median	3	-0.00405269	0.0322074	0.899866	-0.0671793	0.0590739	0.995956	0.935028	1.06085
ebi-a-GCST90001748	oIdGqK	ad	CD20 on IgD+ CD38- B cell	Weighted median	3	0.0509207	0.0444988	0.252493	-0.036297	0.138138	1.05224	0.964354	1.14813
ebi-a-GCST90001751	9v3Tyv	ad	CD20 on IgD+ CD38+ B cell	Weighted median	4	0.00382754	0.0259815	0.882881	-0.0470961	0.0547512	1.00383	0.953996	1.05628
ebi-a-GCST90001752	Jr80cm	ad	CD20 on IgD+ CD38dim B cell	Weighted median	5	-0.00477292	0.0270626	0.860006	-0.0578155	0.0482697	0.995238	0.943824	1.04945
ebi-a-GCST90001754	xiOVII	ad	CD20 on IgD- CD27- B cell	Weighted median	4	0.023501	0.0362296	0.516552	-0.0475089	0.094511	1.02378	0.953602	1.09912
ebi-a-GCST90001755	tl4mFu	ad	CD20 on IgD- CD38- B cell	Weighted median	4	0.0712718	0.0344852	0.038759	0.00368081	0.138863	1.07387	1.00369	1.14897
ebi-a-GCST90001757	HdFOLd	ad	CD20 on IgD- CD38dim B cell	Weighted median	7	0.0580396	0.0267464	0.0300067	0.00561678	0.110463	1.05976	1.00563	1.11679
ebi-a-GCST90001758	44y7VH	ad	CD20 on memory B cell	Weighted median	3	0.0913493	0.0490252	0.062418	-0.00474003	0.187439	1.09565	0.995271	1.20616
ebi-a-GCST90001759	sDvfYS	ad	CD20 on naive-mature B cell	Weighted median	3	-0.012954	0.034587	0.708009	-0.0807445	0.0548366	0.98713	0.922429	1.05637
ebi-a-GCST90001760	zuPhrD	ad	CD20 on unswitched memory B cell	Weighted median	4	0.0811647	0.0313538	0.0096348	0.0197111	0.142618	1.08455	1.01991	1.15329
ebi-a-GCST90001761	IxX3Yk	ad	CD20 on switched memory B cell	Weighted median	7	0.0553565	0.0262818	0.035181	0.00384422	0.106869	1.05692	1.00385	1.11279
ebi-a-GCST90001762	E9pG3r	ad	CD20 on IgD+ B cell	Weighted median	3	-0.00848577	0.0298442	0.776153	-0.0669804	0.0500088	0.99155	0.935214	1.05128
ebi-a-GCST90001765	9pictr	ad	CD24 on IgD+ CD24+ B cell	Weighted median	3	-0.0313169	0.0193165	0.104963	-0.0691773	0.0065434	0.969168	0.933161	1.00656
ebi-a-GCST90001771	Wku3IT	ad	CD24 on memory B cell	Weighted median	3	-0.0278915	0.0198301	0.15957	-0.0667586	0.0109756	0.972494	0.935421	1.01104
ebi-a-GCST90001775	Shf4sD	ad	CD25 on B cell	Weighted median	3	-0.0301436	0.0284774	0.289823	-0.0859592	0.0256721	0.970306	0.917632	1.026
ebi-a-GCST90001777	pVErsF	ad	CD25 on CD24+ CD27+ B cell	Weighted median	3	0.0161484	0.0216201	0.455114	-0.026227	0.0585238	1.01628	0.974114	1.06027
ebi-a-GCST90001779	Z24Y33	ad	CD25 on IgD+ CD24- B cell	Weighted median	4	-0.0255037	0.023975	0.287436	-0.0724947	0.0214873	0.974819	0.930071	1.02172
ebi-a-GCST90001784	RHDFjB	ad	CD25 on IgD+ CD38dim B cell	Weighted median	3	-0.0087609	0.0254804	0.730975	-0.0587025	0.0411807	0.991277	0.942987	1.04204
ebi-a-GCST90001787	CD8zrZ	ad	CD25 on IgD- CD38- B cell	Weighted median	3	0.0406914	0.0252864	0.107569	-0.00887003	0.0902528	1.04153	0.991169	1.09445
ebi-a-GCST90001789	7UNlHL	ad	CD25 on IgD- CD38dim B cell	Weighted median	3	-0.0381282	0.0238751	0.110268	-0.0849233	0.00866688	0.96259	0.918583	1.0087
ebi-a-GCST90001790	iyyyfx	ad	CD25 on memory B cell	Weighted median	3	0.0160195	0.0218182	0.462812	-0.0267443	0.0587832	1.01615	0.97361	1.06055
ebi-a-GCST90001791	JcCvBn	ad	CD25 on naive-mature B cell	Weighted median	4	-0.0285093	0.0258006	0.269165	-0.0790784	0.0220598	0.971893	0.923967	1.0223
ebi-a-GCST90001792	0whGPu	ad	CD25 on unswitched memory B cell	Weighted median	3	0.0127913	0.0227218	0.573466	-0.0317434	0.057326	1.01287	0.968755	1.059
ebi-a-GCST90001798	YdA0Qm	ad	CD27 on CD24+ CD27+ B cell	Weighted median	11	-0.00819927	0.0146404	0.575449	-0.0368944	0.0204959	0.991834	0.963778	1.02071
ebi-a-GCST90001800	SisK8F	ad	CD27 on IgD+ CD24+ B cell	Weighted median	7	-0.00832047	0.0177118	0.638519	-0.0430355	0.0263946	0.991714	0.957877	1.02675
ebi-a-GCST90001801	zJJZ7T	ad	CD27 on IgD+ CD38- unswitched memory B cell	Weighted median	4	-0.00871295	0.0151396	0.564948	-0.0383865	0.0209606	0.991325	0.962341	1.02118
ebi-a-GCST90001802	rwzTLV	ad	CD27 on IgD- CD38- B cell	Weighted median	7	-0.0117263	0.0167661	0.484298	-0.0445879	0.0211352	0.988342	0.956392	1.02136
ebi-a-GCST90001804	1Vq6c5	ad	CD27 on IgD- CD38dim B cell	Weighted median	9	-0.00858671	0.0133482	0.520037	-0.0347491	0.0175757	0.99145	0.965848	1.01773
ebi-a-GCST90001805	6XfMp6	ad	CD27 on memory B cell	Weighted median	8	-0.000582	0.0173972	0.97333	-0.0346802	0.033517	0.999419	0.965914	1.03408
ebi-a-GCST90001806	xVsu9U	ad	CD27 on unswitched memory B cell	Weighted median	10	-0.00540146	0.0171504	0.752802	-0.0390162	0.0282132	0.994613	0.961735	1.02862
ebi-a-GCST90001808	mulhyR	ad	CD27 on switched memory B cell	Weighted median	10	-0.00933055	0.0139662	0.504082	-0.0367043	0.0180432	0.990713	0.963961	1.01821
ebi-a-GCST90001813	2dwq4s	ad	CD38 on IgD+ CD38dim B cell	Weighted median	4	0.0222196	0.0237382	0.34926	-0.0243073	0.0687466	1.02247	0.975986	1.07116
ebi-a-GCST90001815	hOt64P	ad	CD38 on IgD- CD38dim B cell	Weighted median	4	0.0214418	0.0260427	0.410318	-0.0296018	0.0724855	1.02167	0.970832	1.07518
ebi-a-GCST90001816	sDiMPv	ad	CD38 on naive-mature B cell	Weighted median	4	0.0254212	0.0287884	0.377216	-0.031004	0.0818464	1.02575	0.969472	1.08529
ebi-a-GCST90001819	1aqFBG	ad	CD38 on transitional B cell	Weighted median	5	0.0142818	0.0238443	0.549198	-0.032453	0.0610167	1.01438	0.968068	1.06292
ebi-a-GCST90001820	4SOoW3	ad	IgD on IgD+ CD24+ B cell	Weighted median	6	0.0598322	0.0437199	0.171145	-0.0258588	0.145523	1.06166	0.974473	1.15664
ebi-a-GCST90001821	jyTpWf	ad	IgD on IgD+ CD24- B cell	Weighted median	3	0.018451	0.0335719	0.582596	-0.0473499	0.0842518	1.01862	0.953754	1.0879
ebi-a-GCST90001825	lSRUwW	ad	IgD on IgD+ CD38dim B cell	Weighted median	3	0.0178843	0.0321156	0.577613	-0.0450622	0.0808309	1.01805	0.955938	1.08419
ebi-a-GCST90001826	EKyMwD	ad	IgD on unswitched memory B cell	Weighted median	6	0.0450583	0.0505611	0.37284	-0.0540414	0.144158	1.04609	0.947393	1.15507
ebi-a-GCST90001828	zyLT6t	ad	IgD on transitional B cell	Weighted median	3	-0.0395494	0.0380706	0.298877	-0.114168	0.035069	0.961222	0.892108	1.03569
ebi-a-GCST90001829	3zttjK	ad	BAFF-R on B cell	Weighted median	21	-0.00478677	0.00853677	0.574986	-0.0215188	0.0119453	0.995225	0.978711	1.01202
ebi-a-GCST90001838	sigCzA	ad	CD3 on naive CD8+ T cell	Weighted median	8	0.0299203	0.0121413	0.0137265	0.00612336	0.0537173	1.03037	1.00614	1.05519
ebi-a-GCST90001839	HWkBXe	ad	CD3 on Effector Memory CD8+ T cell	Weighted median	3	0.0201702	0.0221204	0.361855	-0.0231858	0.0635261	1.02037	0.977081	1.06559
ebi-a-GCST90001841	1992Pl	ad	CD3 on Central Memory CD4+ T cell	Weighted median	5	0.0276823	0.0144016	0.0545852	-0.000545	0.0559094	1.02807	0.999455	1.0575
ebi-a-GCST90001842	5j1tK6	ad	CD3 on Naive CD4+ T cell	Weighted median	6	0.0235671	0.0106988	0.0276112	0.00259733	0.0445368	1.02385	1.0026	1.04554
ebi-a-GCST90001845	r5XEfg	ad	CD3 on CD45RA- CD4+ T cell	Weighted median	4	0.0300808	0.0151027	0.0463988	0.000479	0.0596822	1.03054	1.00048	1.0615
ebi-a-GCST90001846	jE5yV2	ad	CD3 on Central Memory CD8+ T cell	Weighted median	4	0.0180524	0.0192771	0.349034	-0.0197308	0.0558356	1.01822	0.980463	1.05742
ebi-a-GCST90001851	NJLPtH	ad	CD3 on T cell	Weighted median	3	0.0402332	0.0186793	0.0312482	0.00362185	0.0768445	1.04105	1.00363	1.07987
ebi-a-GCST90001853	ZOK01v	ad	CD3 on activated CD4 regulatory T cell	Weighted median	6	0.0198986	0.0120586	0.0989097	-0.0037362	0.0435335	1.0201	0.996271	1.04449
ebi-a-GCST90001854	IJXpij	ad	CD3 on CD39+ activated CD4 regulatory T cell	Weighted median	6	0.0190273	0.0141595	0.17902	-0.00872538	0.0467799	1.01921	0.991313	1.04789
ebi-a-GCST90001855	Lik0Gb	ad	CD3 on secreting CD4 regulatory T cell	Weighted median	4	0.0142835	0.0124467	0.251144	-0.010112	0.0386791	1.01439	0.989939	1.03944
ebi-a-GCST90001856	5AfbTE	ad	CD3 on CD39+ secreting CD4 regulatory T cell	Weighted median	5	0.0250743	0.01477	0.0895743	-0.00387496	0.0540236	1.02539	0.996133	1.05551
ebi-a-GCST90001857	Ldoexc	ad	CD3 on activated & secreting CD4 regulatory T cell	Weighted median	6	0.0185136	0.0117484	0.115062	-0.0045132	0.0415404	1.01869	0.995497	1.04242
ebi-a-GCST90001858	gIrbgk	ad	CD3 on CD45RA+ CD4+ T cell	Weighted median	8	0.0244669	0.0113461	0.0310504	0.00222866	0.0467052	1.02477	1.00223	1.04781
ebi-a-GCST90001859	qiAGRL	ad	CD3 on CD8+ T cell	Weighted median	3	0.0215908	0.0193296	0.264003	-0.0162953	0.0594769	1.02183	0.983837	1.06128
ebi-a-GCST90001860	SiaogK	ad	CD3 on CD39+ CD4+ T cell	Weighted median	5	0.0207742	0.011767	0.0774847	-0.00228902	0.0438375	1.02099	0.997714	1.04481
ebi-a-GCST90001861	zJI4Wu	ad	CD3 on CD28+ CD4+ T cell	Weighted median	3	0.0422671	0.0155979	0.00673232	0.0116953	0.0728389	1.04317	1.01176	1.07556
ebi-a-GCST90001863	AlFkgi	ad	CD3 on CD28+ CD45RA- CD8+ T cell	Weighted median	5	0.0381565	0.0203316	0.060558	-0.00169344	0.0780065	1.03889	0.998308	1.08113
ebi-a-GCST90001864	YzQcl2	ad	CD3 on CD28+ CD45RA+ CD8+ T cell	Weighted median	7	0.0298052	0.012176	0.0143706	0.00594023	0.0536701	1.03025	1.00596	1.05514
ebi-a-GCST90001867	r5hrIY	ad	CD3 on CD4+ T cell	Weighted median	3	-0.0107112	0.0289777	0.711653	-0.0675075	0.0460851	0.989346	0.934721	1.04716
ebi-a-GCST90001868	JJXyZv	ad	CD3 on CD4 regulatory T cell	Weighted median	5	0.0219248	0.0122343	0.0731219	-0.00205452	0.045904	1.02217	0.997948	1.04697
ebi-a-GCST90001869	WbXu6p	ad	CD3 on resting CD4 regulatory T cell	Weighted median	7	-0.0186206	0.0158321	0.239543	-0.0496515	0.0124103	0.981552	0.951561	1.01249
ebi-a-GCST90001870	aq3DI1	ad	CD34 on Hematopoietic Stem Cell	Weighted median	4	0.0311147	0.0290215	0.283663	-0.0257674	0.0879968	1.0316	0.974562	1.09198
ebi-a-GCST90001883	DrHRbu	ad	CD16-CD56 on Natural Killer T	Weighted median	7	0.00429417	0.0216143	0.842519	-0.0380698	0.0466581	1.0043	0.962646	1.04776
ebi-a-GCST90001884	uH5Eyv	ad	CD16-CD56 on Natural Killer	Weighted median	9	-0.0332089	0.0179635	0.0645038	-0.0684174	0.00199968	0.967336	0.933871	1.002
ebi-a-GCST90001886	erpCXO	ad	CD28 on CD39+ activated CD4 regulatory T cell	Weighted median	3	-0.00341586	0.0287971	0.905578	-0.0598582	0.0530264	0.99659	0.941898	1.05446
ebi-a-GCST90001887	vM22Za	ad	CD28 on secreting CD4 regulatory T cell	Weighted median	4	-0.00829581	0.0230298	0.718682	-0.0534342	0.0368426	0.991739	0.947968	1.03753
ebi-a-GCST90001891	5uRLx9	ad	CD28 on CD45RA- CD4 not regulatory T cell	Weighted median	3	-0.0105525	0.0201177	0.599905	-0.0499831	0.0288782	0.989503	0.951245	1.0293
ebi-a-GCST90001892	D3LvOB	ad	CD28 on CD39+ CD4+ T cell	Weighted median	8	0.0225357	0.0140869	0.109652	-0.00507471	0.0501461	1.02279	0.994938	1.05142
ebi-a-GCST90001894	8ML4BV	ad	CD28 on CD28+ CD4+ T cell	Weighted median	3	-0.00896389	0.021884	0.682093	-0.0518566	0.0339288	0.991076	0.949465	1.03451
ebi-a-GCST90001898	OHx3fW	ad	CD28 on CD4+ T cell	Weighted median	3	-0.00935666	0.0221277	0.672407	-0.052727	0.0340137	0.990687	0.948639	1.0346
ebi-a-GCST90001907	j4dGKn	ad	CCR7 on naive CD4+ T cell	Weighted median	4	0.00723836	0.0278223	0.794737	-0.0472933	0.06177	1.00726	0.953808	1.06372
ebi-a-GCST90001926	iDhplJ	ad	CD127 on granulocyte	Weighted median	8	-0.0219835	0.0221572	0.32112	-0.0654116	0.0214446	0.978256	0.936682	1.02168
ebi-a-GCST90001932	kMnbXz	ad	CD127 on CD45RA+ CD4+ T cell	Weighted median	4	0.0463103	0.0294532	0.115873	-0.011418	0.104039	1.0474	0.988647	1.10964
ebi-a-GCST90001946	VGlAAY	ad	CD33 on CD14+ monocyte	Weighted median	8	0.027005	0.00775186	0.000495	0.0118114	0.0421987	1.02737	1.01188	1.0431
ebi-a-GCST90001947	UEHLz0	ad	CD33 on CD33+ HLA DR+ CD14dim	Weighted median	6	0.0273029	0.00749572	0.00027	0.0126113	0.0419945	1.02768	1.01269	1.04289
ebi-a-GCST90001948	0pUxFy	ad	CD33 on CD33dim HLA DR+ CD11b+	Weighted median	7	0.0272778	0.00767391	0.000379	0.012237	0.0423187	1.02765	1.01231	1.04323
ebi-a-GCST90001949	5td6iy	ad	CD33 on CD33dim HLA DR+ CD11b-	Weighted median	7	0.0270304	0.00786274	0.000587	0.0116194	0.0424413	1.0274	1.01169	1.04335
ebi-a-GCST90001950	MjVxTn	ad	CD33 on Granulocytic Myeloid-Derived Suppressor Cells	Weighted median	3	0.0325003	0.0111042	0.00342415	0.0107361	0.0542646	1.03303	1.01079	1.05576
ebi-a-GCST90001951	RCNrSy	ad	CD33 on CD66b++ myeloid cell	Weighted median	6	0.0319533	0.00968733	0.00097216	0.0129661	0.0509405	1.03247	1.01305	1.05226
ebi-a-GCST90001952	horFa4	ad	CD33 on Monocytic Myeloid-Derived Suppressor Cells	Weighted median	4	0.0274876	0.00769852	0.000356	0.0123985	0.0425767	1.02787	1.01248	1.0435
ebi-a-GCST90001953	lWHSCu	ad	CD33 on CD33dim HLA DR-	Weighted median	5	0.0270348	0.00776279	0.000497	0.0118197	0.0422499	1.0274	1.01189	1.04316
ebi-a-GCST90001954	dcPQXI	ad	CD33 on basophil	Weighted median	8	0.0240955	0.00753224	0.00137912	0.00933234	0.0388587	1.02439	1.00938	1.03962
ebi-a-GCST90001955	gjui1T	ad	CD33 on Immature Myeloid-Derived Suppressor Cells	Weighted median	6	0.0250052	0.00813069	0.00210217	0.00906901	0.0409413	1.02532	1.00911	1.04179
ebi-a-GCST90001956	WhwnGC	ad	CD33 on CD33+ HLA DR+	Weighted median	5	0.0267351	0.00723198	0.000218	0.0125604	0.0409098	1.0271	1.01264	1.04176
ebi-a-GCST90001957	SvpGGr	ad	CD33 on CD33+ HLA DR+ CD14-	Weighted median	5	0.0266295	0.00744083	0.000345	0.0120455	0.0412135	1.02699	1.01212	1.04207
ebi-a-GCST90001961	z1wfSc	ad	CD25 on CD39+ CD4+ T cell	Weighted median	9	-0.0285067	0.0117955	0.0156605	-0.051626	-0.00538742	0.971896	0.949684	0.994627
ebi-a-GCST90001963	3PbSJY	ad	FSC-A on myeloid Dendritic Cell	Weighted median	3	-0.0350642	0.0231274	0.129487	-0.0803939	0.0102656	0.965543	0.922753	1.01032
ebi-a-GCST90001964	hUaYb5	ad	FSC-A on plasmacytoid Dendritic Cell	Weighted median	4	-0.0491664	0.0437433	0.261023	-0.134903	0.0365704	0.952023	0.873801	1.03725
ebi-a-GCST90001969	01dGA9	ad	FSC-A on Natural Killer	Weighted median	3	-0.0147166	0.0283785	0.604052	-0.0703384	0.0409052	0.985391	0.932078	1.04175
ebi-a-GCST90001970	lWKfKG	ad	FSC-A on HLA DR+ Natural Killer	Weighted median	3	-0.0198615	0.0216697	0.359375	-0.0623341	0.0226111	0.980334	0.939569	1.02287
ebi-a-GCST90001979	5UFIei	ad	CD16 on CD14- CD16+ monocyte	Weighted median	10	-0.0249764	0.00966804	0.00978314	-0.0439258	-0.00602707	0.975333	0.957025	0.993991
ebi-a-GCST90001980	KHlT5p	ad	CD40 on CD14+ CD16- monocyte	Weighted median	4	0.0099575	0.0123047	0.418377	-0.0141598	0.0340748	1.01001	0.98594	1.03466
ebi-a-GCST90001981	4yOTHe	ad	CD40 on CD14+ CD16+ monocyte	Weighted median	5	0.0113505	0.0110881	0.305994	-0.0103822	0.0330833	1.01142	0.989671	1.03364
ebi-a-GCST90001984	xmVR0J	ad	HLA DR on CD14- CD16+ monocyte	Weighted median	6	-0.0192837	0.0260735	0.459548	-0.0703878	0.0318204	0.980901	0.932032	1.03233
ebi-a-GCST90001985	wjYDN3	ad	CD40 on monocytes	Weighted median	6	0.0067805	0.0112368	0.54623	-0.0152436	0.0288046	1.0068	0.984872	1.02922
ebi-a-GCST90001987	MzuIRj	ad	CD64 on CD14+ CD16- monocyte	Weighted median	18	0.00597371	0.0124801	0.63218	-0.0184872	0.0304346	1.00599	0.981683	1.0309
ebi-a-GCST90001988	b0D2Fn	ad	HLA DR on CD14+ CD16- monocyte	Weighted median	9	-0.0380116	0.0194108	0.0501981	-0.0760567	3.35e-05	0.962702	0.926764	1.00003
ebi-a-GCST90001989	Iv7prw	ad	CD40 on CD14- CD16+ monocyte	Weighted median	9	0.0067546	0.0107746	0.530726	-0.0143637	0.0278729	1.00678	0.985739	1.02826
ebi-a-GCST90001991	AY2ICl	ad	HLA DR on CD14+ monocyte	Weighted median	8	-0.0359101	0.0193446	0.0634061	-0.0738256	0.0020054	0.964727	0.928834	1.00201
ebi-a-GCST90002003	ywEqNR	ad	CCR2 on CD14- CD16-	Weighted median	3	-0.0141183	0.0384	0.713123	-0.0893823	0.0611456	0.985981	0.914496	1.06305
ebi-a-GCST90002004	fLNwE0	ad	CCR2 on CD14+ CD16- monocyte	Weighted median	3	0.00708654	0.0283486	0.802604	-0.0484767	0.0626498	1.00711	0.95268	1.06465
ebi-a-GCST90002005	2OmrRH	ad	CD16 on CD14+ CD16+ monocyte	Weighted median	7	-0.0294166	0.0139721	0.0352585	-0.0568019	-0.00203123	0.971012	0.944781	0.997971
ebi-a-GCST90002006	ZA7l6Y	ad	CD64 on monocyte	Weighted median	17	0.00410747	0.0145604	0.777867	-0.0244308	0.0326458	1.00412	0.975865	1.03318
ebi-a-GCST90002007	C6DjmL	ad	HLA DR on CD14+ CD16+ monocyte	Weighted median	6	0.00783335	0.0180164	0.663715	-0.0274788	0.0431455	1.00786	0.972895	1.04409
ebi-a-GCST90002009	fbwYOq	ad	HLA DR on CD14- CD16-	Weighted median	8	0.00504765	0.0182392	0.781974	-0.0307012	0.0407965	1.00506	0.969765	1.04164
ebi-a-GCST90002010	q0KzY4	ad	HLA DR on monocyte	Weighted median	8	-0.0344431	0.0136266	0.0114835	-0.0611512	-0.0077349	0.966143	0.940681	0.992295
ebi-a-GCST90002024	tJmG9b	ad	CD4 on naive CD4+ T cell	Weighted median	5	-0.0991762	0.0315294	0.00165793	-0.160974	-0.0373786	0.905583	0.851314	0.963311
ebi-a-GCST90002030	pvpOdh	ad	CD39 on CD39+ activated CD4 regulatory T cell	Weighted median	11	-0.0107384	0.0147565	0.466796	-0.0396612	0.0181844	0.989319	0.961115	1.01835
ebi-a-GCST90002031	BVLqAr	ad	CD39 on CD39+ secreting CD4 regulatory T cell	Weighted median	13	0.01689	0.00799991	0.0347485	0.0012102	0.0325698	1.01703	1.00121	1.03311
ebi-a-GCST90002032	H3eIir	ad	CD39 on CD39+ CD4+ T cell	Weighted median	12	0.0167335	0.00817209	0.0405959	0.000716	0.0327508	1.01687	1.00072	1.03329
ebi-a-GCST90002033	QdHcCq	ad	CD39 on granulocyte	Weighted median	3	0.0982936	0.0390376	0.0118049	0.02178	0.174807	1.10329	1.02202	1.19102
ebi-a-GCST90002035	zgC7mV	ad	CD80 on myeloid Dendritic Cell	Weighted median	4	0.03988	0.0283033	0.158829	-0.0155945	0.0953545	1.04069	0.984526	1.10005
ebi-a-GCST90002036	iV9Jw1	ad	CD80 on CD62L+ myeloid Dendritic Cell	Weighted median	3	-0.0132097	0.0377357	0.726296	-0.0871717	0.0607524	0.986877	0.91652	1.06264
ebi-a-GCST90002039	4P3SFb	ad	CD80 on monocyte	Weighted median	7	-0.00557485	0.0198386	0.778702	-0.0444585	0.0333088	0.994441	0.956515	1.03387
ebi-a-GCST90002040	SPL66E	ad	CD80 on granulocyte	Weighted median	3	0.0844788	0.0301165	0.00503056	0.0254505	0.143507	1.08815	1.02578	1.15432
ebi-a-GCST90002054	AgixsW	ad	CD8 on Central Memory CD8+ T cell	Weighted median	3	0.039131	0.0221485	0.0772684	-0.00427996	0.082542	1.03991	0.995729	1.08604
ebi-a-GCST90002056	iwU9Fg	ad	CD8 on Effector Memory CD8+ T cell	Weighted median	3	-0.0154106	0.0205997	0.4544	-0.0557859	0.0249647	0.984708	0.945742	1.02528
ebi-a-GCST90002061	9eYxmj	ad	CD4 on CD39+ CD4+ T cell	Weighted median	7	0.0420753	0.015516	0.00669325	0.0116639	0.0724868	1.04297	1.01173	1.07518
ebi-a-GCST90002067	Mmcx0d	ad	CD4 on CD39+ activated CD4 regulatory T cell	Weighted median	4	-0.0278058	0.0279917	0.320535	-0.0826695	0.0270579	0.972577	0.920655	1.02743
ebi-a-GCST90002069	dw9EGN	ad	CD4 on CD39+ secreting CD4 regulatory T cell	Weighted median	3	0.0625303	0.0236132	0.00809449	0.0162483	0.108812	1.06453	1.01638	1.11495
ebi-a-GCST90002071	2usnT0	ad	SSC-A on myeloid Dendritic Cell	Weighted median	4	-0.00257501	0.0356613	0.942437	-0.0724712	0.0673212	0.997428	0.930093	1.06964
ebi-a-GCST90002072	hfd37q	ad	SSC-A on plasmacytoid Dendritic Cell	Weighted median	4	-0.0429111	0.0452175	0.342624	-0.131537	0.0457152	0.957997	0.876747	1.04678
ebi-a-GCST90002073	KiodgE	ad	SSC-A on monocyte	Weighted median	10	-0.00266106	0.0118862	0.822852	-0.025958	0.0206359	0.997342	0.974376	1.02085
ebi-a-GCST90002074	BSLRAj	ad	SSC-A on CD14+ monocyte	Weighted median	6	-0.00514538	0.0140871	0.714922	-0.0327562	0.0224654	0.994868	0.967774	1.02272
ebi-a-GCST90002077	cOaDt5	ad	SSC-A on HLA DR+ Natural Killer	Weighted median	4	-0.0395094	0.0191052	0.0386409	-0.0769557	-0.00206318	0.961261	0.925931	0.997939
ebi-a-GCST90002087	99PqZf	ad	CD11c on myeloid Dendritic Cell	Weighted median	4	0.0215296	0.029171	0.460485	-0.0356455	0.0787046	1.02176	0.964982	1.08188
ebi-a-GCST90002098	kIvnqq	ad	CD45RA on naive CD4+ T cell	Weighted median	13	0.00983962	0.00959653	0.305207	-0.00896958	0.0286488	1.00989	0.991071	1.02906
ebi-a-GCST90002099	cQKYfQ	ad	CD4RA on Terminally Differentiated CD4+ T cell	Weighted median	4	0.0211273	0.0131133	0.107151	-0.00457483	0.0468294	1.02135	0.995436	1.04794
ebi-a-GCST90002102	jVVTW2	ad	CD45RA on resting CD4 regulatory T cell	Weighted median	9	0.0169144	0.0087159	0.052303	-0.000169	0.0339975	1.01706	0.999831	1.03458
ebi-a-GCST90002104	8U6elL	ad	HLA DR on myeloid Dendritic Cell	Weighted median	10	-0.0797295	0.0170615	2.97e-06	-0.11317	-0.0462889	0.923366	0.892999	0.954766
ebi-a-GCST90002105	LcvlDq	ad	HLA DR on plasmacytoid Dendritic Cell	Weighted median	14	0.00365784	0.0196737	0.852503	-0.0349025	0.0422182	1.00366	0.9657	1.04312
ebi-a-GCST90002106	HHEXhF	ad	HLA DR on Dendritic Cell	Weighted median	11	0.013072	0.0199442	0.512192	-0.0260187	0.0521627	1.01316	0.974317	1.05355
ebi-a-GCST90002108	10MYNa	ad	HLA DR on CD33+ HLA DR+ CD14-	Weighted median	9	-0.0303671	0.0128648	0.0182516	-0.0555821	-0.00515204	0.970089	0.945934	0.994861
ebi-a-GCST90002109	iXTkdl	ad	HLA DR on CD33+ HLA DR+ CD14dim	Weighted median	3	-0.0402462	0.0191135	0.0352352	-0.0777086	-0.00278377	0.960553	0.925234	0.99722
ebi-a-GCST90002110	Drm4aJ	ad	HLA DR on CD33dim HLA DR+ CD11b+	Weighted median	7	-0.0230088	0.0249694	0.3568	-0.0719489	0.0259313	0.977254	0.930578	1.02627
ebi-a-GCST90002111	ameh1K	ad	HLA DR on CD33dim HLA DR+ CD11b-	Weighted median	5	0.0323882	0.0257185	0.207909	-0.01802	0.0827965	1.03292	0.982141	1.08632
ebi-a-GCST90002112	I6OL15	ad	HLA DR on CD33- HLA DR+	Weighted median	5	-0.00526716	0.0247969	0.831785	-0.0538691	0.0433347	0.994747	0.947556	1.04429
ebi-a-GCST90002116	2Wy0f5	ad	HLA DR on B cell	Weighted median	10	-0.038031	0.0212763	0.0738598	-0.0797325	0.00367056	0.962683	0.923363	1.00368
ebi-a-GCST90002117	sLwOZ8	ad	HLA DR on HLA DR+ Natural Killer	Weighted median	5	0.0328559	0.0221695	0.138332	-0.0105963	0.0763082	1.0334	0.98946	1.0793
ebi-a-GCST90002118	Wx2D2n	ad	CD8 on CD28+ CD45RA- CD8+ T cell	Weighted median	4	-0.0419229	0.0374546	0.263013	-0.115334	0.0314882	0.958944	0.891069	1.03199
ebi-a-GCST90002119	mK93wi	ad	CD8 on CD28+ CD45RA+ CD8+ T cell	Weighted median	8	0.0212487	0.0156764	0.175272	-0.00947704	0.0519743	1.02148	0.990568	1.05335
ebi-a-GCST90002120	PDlAI4	ad	CD8 on CD28- CD8+ T cell	Weighted median	3	0.039316	0.0370429	0.288524	-0.033288	0.11192	1.0401	0.96726	1.11842
ebi-a-GCST90002121	1MXJFX	ad	CD8 on CD39+ CD8+ T cell	Weighted median	4	0.0761196	0.032114	0.0177741	0.0131761	0.139063	1.07909	1.01326	1.1492
ebi-a-GCST90001399	Ure4zi	ad	IgD- CD27- B cell %B cell	Weighted mode	3	0.010826	0.0235538	0.690907	-0.0353394	0.0569914	1.01088	0.965278	1.05865
ebi-a-GCST90001417	WXoBE0	ad	CD24+ CD27+ B cell %B cell	Weighted mode	3	0.0822922	0.0513607	0.250272	-0.0183747	0.182959	1.08577	0.981793	1.20077
ebi-a-GCST90001432	7MpxWk	ad	Unswitched memory B cell %lymphocyte	Weighted mode	3	-0.0508674	0.0634331	0.506746	-0.175196	0.0734616	0.950405	0.839292	1.07623
ebi-a-GCST90001434	Axw6QC	ad	Switched memory B cell %lymphocyte	Weighted mode	3	-0.0984073	0.0449018	0.15975	-0.186415	-0.0103998	0.90628	0.829929	0.989654
ebi-a-GCST90001442	erehYt	ad	CD24+ CD27+ B cell %lymphocyte	Weighted mode	3	0.226999	0.0878466	0.122782	0.0548192	0.399178	1.25483	1.05635	1.4906
ebi-a-GCST90001450	lFzJXO	ad	CD62L- monocyte Absolute Count	Weighted mode	4	0.0137625	0.0344208	0.716047	-0.0537023	0.0812273	1.01386	0.947714	1.08462
ebi-a-GCST90001451	fbksmE	ad	CD62L- monocyte %monocyte	Weighted mode	3	0.00439718	0.0257356	0.880056	-0.0460446	0.054839	1.00441	0.954999	1.05637
ebi-a-GCST90001458	YG2GQg	ad	Myeloid Dendritic Cell Absolute Count	Weighted mode	5	0.0323959	0.0177359	0.141791	-0.00236648	0.0671583	1.03293	0.997636	1.06946
ebi-a-GCST90001462	NY4XdH	ad	CD62L- Dendritic Cell Absolute Count	Weighted mode	4	0.0279518	0.0157547	0.174132	-0.00292744	0.058831	1.02835	0.997077	1.0606
ebi-a-GCST90001463	qIqsZF	ad	CD62L- Dendritic Cell %Dendritic Cell	Weighted mode	3	-0.0246969	0.0439594	0.630805	-0.110857	0.0614635	0.975606	0.895066	1.06339
ebi-a-GCST90001464	8VmkKc	ad	CD86+ myeloid Dendritic Cell Absolute Count	Weighted mode	4	0.030557	0.0157006	0.146814	-0.000216	0.0613302	1.03103	0.999784	1.06325
ebi-a-GCST90001465	3E78En	ad	CD86+ myeloid Dendritic Cell %Dendritic Cell	Weighted mode	4	0.0311416	0.0150377	0.13013	0.00166765	0.0606155	1.03163	1.00167	1.06249
ebi-a-GCST90001468	VomKYe	ad	CD62L- myeloid Dendritic Cell Absolute Count	Weighted mode	6	0.023979	0.0151815	0.175059	-0.00577666	0.0537347	1.02427	0.99424	1.0552
ebi-a-GCST90001469	4FtSit	ad	CD62L- myeloid Dendritic Cell %Dendritic Cell	Weighted mode	7	0.0292813	0.0164063	0.124554	-0.00287514	0.0614377	1.02971	0.997129	1.06336
ebi-a-GCST90001471	A1tSgF	ad	CD62L- plasmacytoid Dendritic Cell %Dendritic Cell	Weighted mode	3	-0.00238014	0.0292933	0.942641	-0.0597949	0.0550347	0.997623	0.941958	1.05658
ebi-a-GCST90001472	oGolpf	ad	CD62L- CD86+ myeloid Dendritic Cell Absolute Count	Weighted mode	5	0.0262441	0.013344	0.12062	8.98e-05	0.0523983	1.02659	1.00009	1.0538
ebi-a-GCST90001473	a8ZHVl	ad	CD62L- CD86+ myeloid Dendritic Cell %Dendritic Cell	Weighted mode	6	0.0263026	0.0134281	0.107456	-1.64e-05	0.0526217	1.02665	0.999984	1.05403
ebi-a-GCST90001475	bdWjjD	ad	HLA DR++ monocyte %monocyte	Weighted mode	3	-0.0827788	0.0286024	0.101531	-0.138839	-0.0267181	0.920555	0.870368	0.973636
ebi-a-GCST90001480	g7H8xO	ad	Resting CD4 regulatory T cell Absolute Count	Weighted mode	6	0.0154396	0.0138489	0.31561	-0.0117043	0.0425834	1.01556	0.988364	1.0435
ebi-a-GCST90001481	cgQ95v	ad	Resting CD4 regulatory T cell %CD4 regulatory T cell	Weighted mode	15	0.0142211	0.00659691	0.0489913	0.0012912	0.0271511	1.01432	1.00129	1.02752
ebi-a-GCST90001482	zi7rhx	ad	Resting CD4 regulatory T cell %CD4+ T cell	Weighted mode	10	0.00937103	0.0102781	0.385671	-0.010774	0.029516	1.00942	0.989284	1.02996
ebi-a-GCST90001483	mLpXYj	ad	CD39+ resting CD4 regulatory T cell Absolute Count	Weighted mode	18	0.0169488	0.00762777	0.0401472	0.00199836	0.0318992	1.01709	1.002	1.03241
ebi-a-GCST90001484	C4f0zM	ad	CD39+ resting CD4 regulatory T cell %resting CD4 regulatory T cell	Weighted mode	15	0.0175338	0.00798088	0.0453567	0.00189127	0.0331763	1.01769	1.00189	1.03373
ebi-a-GCST90001485	Jm1uoi	ad	CD39+ resting CD4 regulatory T cell %CD4 regulatory T cell	Weighted mode	22	0.0224968	0.0055375	0.000559	0.0116433	0.0333503	1.02275	1.01171	1.03391
ebi-a-GCST90001486	uOTe3c	ad	Activated CD4 regulatory T cell Absolute Count	Weighted mode	3	-0.0290506	0.0207031	0.295663	-0.0696288	0.0115275	0.971367	0.93274	1.01159
ebi-a-GCST90001487	eAPiZv	ad	Activated CD4 regulatory T cell %CD4 regulatory T cell	Weighted mode	5	-0.0141391	0.0136446	0.358622	-0.0408826	0.0126043	0.98596	0.959942	1.01268
ebi-a-GCST90001489	CvSRlD	ad	CD39+ activated CD4 regulatory T cell Absolute Count	Weighted mode	13	0.0205846	0.00892968	0.0398216	0.00308245	0.0380868	1.0208	1.00309	1.03882
ebi-a-GCST90001491	WqLxa5	ad	CD39+ activated CD4 regulatory T cell %CD4 regulatory T cell	Weighted mode	12	0.0198128	0.00860437	0.0418369	0.00294823	0.0366774	1.02001	1.00295	1.03736
ebi-a-GCST90001492	H7Dc2t	ad	Secreting CD4 regulatory T cell Absolute Count	Weighted mode	6	-0.0312542	0.0127395	0.0577002	-0.0562237	-0.00628471	0.969229	0.945328	0.993735
ebi-a-GCST90001493	1UQy5C	ad	Secreting CD4 regulatory T cell %CD4 regulatory T cell	Weighted mode	11	-0.0256917	0.00847723	0.0126626	-0.0423071	-0.00907634	0.974636	0.958575	0.990965
ebi-a-GCST90001494	FXLdfU	ad	Secreting CD4 regulatory T cell %CD4+ T cell	Weighted mode	10	-0.0282623	0.0104194	0.0239003	-0.0486842	-0.00784033	0.972133	0.952482	0.99219
ebi-a-GCST90001495	ZsQiEt	ad	CD39+ secreting CD4 regulatory T cell Absolute Count	Weighted mode	16	0.0169275	0.00795473	0.0503287	0.00133625	0.0325188	1.01707	1.00134	1.03305
ebi-a-GCST90001496	5zt7zw	ad	CD39+ secreting CD4 regulatory T cell %secreting CD4 regulatory T cell	Weighted mode	14	-0.000102	0.0177513	0.995517	-0.0348942	0.0346908	0.999898	0.965708	1.0353
ebi-a-GCST90001497	PBUuH6	ad	CD39+ secreting CD4 regulatory T cell %CD4 regulatory T cell	Weighted mode	13	-0.000967	0.0192175	0.9607	-0.0386332	0.0366994	0.999034	0.962104	1.03738
ebi-a-GCST90001499	c4hqeu	ad	Activated & resting CD4 regulatory T cell %CD4 regulatory T cell	Weighted mode	11	0.0252234	0.00940082	0.02297	0.00679778	0.043649	1.02554	1.00682	1.04462
ebi-a-GCST90001500	lmswJj	ad	Activated & resting CD4 regulatory T cell %CD4+ T cell	Weighted mode	6	0.013426	0.0131967	0.35565	-0.0124396	0.0392916	1.01352	0.987637	1.04007
ebi-a-GCST90001501	B8bF2c	ad	Activated & secreting CD4 regulatory T cell Absolute Count	Weighted mode	6	-0.0241105	0.0117742	0.095919	-0.047188	-0.00103302	0.976178	0.953908	0.998968
ebi-a-GCST90001502	RSG0Vb	ad	Activated & secreting CD4 regulatory T cell %CD4 regulatory T cell	Weighted mode	15	-0.0229621	0.00723299	0.00675275	-0.0371388	-0.00878542	0.9773	0.963542	0.991253
ebi-a-GCST90001503	ZIMebt	ad	Activated & secreting CD4 regulatory T cell %CD4+ T cell	Weighted mode	11	-0.0231631	0.0111696	0.0648731	-0.0450556	-0.00127068	0.977103	0.955944	0.99873
ebi-a-GCST90001507	o5PdKm	ad	CD25++ CD45RA+ CD4 not regulatory T cell Absolute Count	Weighted mode	6	0.0144332	0.01226	0.292075	-0.00959643	0.0384629	1.01454	0.990449	1.03921
ebi-a-GCST90001508	4yUDad	ad	CD25++ CD45RA+ CD4 not regulatory T cell %CD4+ T cell	Weighted mode	9	0.0134783	0.0102543	0.225141	-0.0066201	0.0335767	1.01357	0.993402	1.03415
ebi-a-GCST90001509	vamPqZ	ad	CD25++ CD45RA+ CD4 not regulatory T cell %T cell	Weighted mode	8	0.0135291	0.0111499	0.264336	-0.00832483	0.0353829	1.01362	0.99171	1.03602
ebi-a-GCST90001510	YUP1j0	ad	CD25++ CD45RA- CD4 not regulatory T cell Absolute Count	Weighted mode	4	-0.0411393	0.0194373	0.124595	-0.0792364	-0.00304208	0.959695	0.923821	0.996963
ebi-a-GCST90001511	pdwNGn	ad	CD25++ CD45RA- CD4 not regulatory T cell %CD4+ T cell	Weighted mode	6	-0.00899133	0.0152395	0.580843	-0.0388608	0.0208781	0.991049	0.961885	1.0211
ebi-a-GCST90001512	37xpFN	ad	CD25++ CD45RA- CD4 not regulatory T cell %T cell	Weighted mode	5	-0.0464489	0.0183432	0.0645132	-0.0824016	-0.0104961	0.954613	0.920902	0.989559
ebi-a-GCST90001514	60Q6a7	ad	Hematopoietic Stem Cell Absolute Count	Weighted mode	3	0.0224923	0.0198222	0.374184	-0.0163591	0.0613438	1.02275	0.983774	1.06326
ebi-a-GCST90001530	QrMnyU	ad	Monocytic Myeloid-Derived Suppressor Cells Absolute Count	Weighted mode	4	0.0543092	0.0172021	0.050984	0.0205931	0.0880253	1.05581	1.02081	1.09202
ebi-a-GCST90001532	WwjAjA	ad	Basophil Absolute Count	Weighted mode	3	0.00203782	0.00991956	0.856245	-0.0174045	0.0214802	1.00204	0.982746	1.02171
ebi-a-GCST90001533	tpuwaW	ad	Basophil %CD33dim HLA DR- CD66b-	Weighted mode	3	0.0611767	0.0187513	0.0824905	0.0244242	0.0979292	1.06309	1.02472	1.10288
ebi-a-GCST90001535	mC0NXX	ad	CD45RA- CD4+ T cell %CD4+ T cell	Weighted mode	6	-0.0316238	0.0142878	0.0777771	-0.059628	-0.00361967	0.968871	0.942115	0.996387
ebi-a-GCST90001536	OD6kJq	ad	CD45RA- CD4+ T cell %T cell	Weighted mode	4	-0.0283057	0.0163045	0.180953	-0.0602625	0.00365102	0.972091	0.941517	1.00366
ebi-a-GCST90001544	4XYWiY	ad	Effector Memory CD4+ T cell %T cell	Weighted mode	4	-0.0241979	0.0173707	0.257888	-0.0582444	0.00984856	0.976092	0.943419	1.0099
ebi-a-GCST90001546	vsmitp	ad	Terminally Differentiated CD4+ T cell %CD4+ T cell	Weighted mode	3	0.051908	0.0286995	0.212227	-0.004343	0.108159	1.05328	0.995666	1.11422
ebi-a-GCST90001547	2TwTQI	ad	Terminally Differentiated CD4+ T cell %T cell	Weighted mode	4	0.0118951	0.0237113	0.650406	-0.034579	0.0583692	1.01197	0.966012	1.06011
ebi-a-GCST90001555	LzwxTZ	ad	Effector Memory CD8+ T cell %CD8+ T cell	Weighted mode	6	-0.00921354	0.0139935	0.539376	-0.0366408	0.0182137	0.990829	0.964022	1.01838
ebi-a-GCST90001558	xuadsh	ad	Terminally Differentiated CD8+ T cell %CD8+ T cell	Weighted mode	5	0.0200905	0.0140007	0.224621	-0.00735085	0.0475318	1.02029	0.992676	1.04868
ebi-a-GCST90001560	usThBK	ad	CD45RA+ CD8+ T cell Absolute Count	Weighted mode	3	0.0200019	0.0429995	0.687546	-0.0642772	0.104281	1.0202	0.937745	1.10991
ebi-a-GCST90001561	Z0G3iE	ad	CD45RA+ CD8+ T cell %CD8+ T cell	Weighted mode	7	0.00976482	0.00917636	0.328209	-0.00822083	0.0277505	1.00981	0.991813	1.02814
ebi-a-GCST90001562	fGgyZ4	ad	CD45RA+ CD8+ T cell %T cell	Weighted mode	4	0.0435626	0.0229048	0.153345	-0.00133084	0.0884561	1.04453	0.99867	1.09249
ebi-a-GCST90001569	TdECnO	ad	Effector Memory CD4-CD8- T cell Absolute Count	Weighted mode	4	-0.0176969	0.0435478	0.711716	-0.103051	0.0676568	0.982459	0.902081	1.07
ebi-a-GCST90001570	sP6CaK	ad	Effector Memory CD4-CD8- T cell %CD4-CD8- T cell	Weighted mode	4	-0.0176591	0.0137408	0.288969	-0.0445912	0.00927294	0.982496	0.956388	1.00932
ebi-a-GCST90001571	R9ufP9	ad	Effector Memory CD4-CD8- T cell %T cell	Weighted mode	4	-0.0775057	0.0454306	0.186546	-0.16655	0.0115384	0.925422	0.846581	1.01161
ebi-a-GCST90001573	puZeuK	ad	Terminally Differentiated CD4-CD8- T cell %CD4-CD8- T cell	Weighted mode	3	0.016785	0.0141272	0.356746	-0.0109043	0.0444742	1.01693	0.989155	1.04548
ebi-a-GCST90001574	rjPTCU	ad	Terminally Differentiated CD4-CD8- T cell %T cell	Weighted mode	4	0.0289985	0.0232041	0.300019	-0.0164814	0.0744785	1.02942	0.983654	1.07732
ebi-a-GCST90001581	JaYMBL	ad	CD14- CD16- Absolute Count	Weighted mode	3	0.0207816	0.0372	0.632603	-0.0521303	0.0936936	1.021	0.949205	1.09822
ebi-a-GCST90001582	zjbOyn	ad	CD14+ CD16- monocyte Absolute Count	Weighted mode	3	-0.0121497	0.0427615	0.803028	-0.0959623	0.0716629	0.987924	0.908498	1.07429
ebi-a-GCST90001592	3MO8rE	ad	CD8+ T cell Absolute Count	Weighted mode	3	0.0196871	0.0330037	0.61136	-0.0450001	0.0843743	1.01988	0.955997	1.08804
ebi-a-GCST90001596	wKWIUN	ad	CD8dim T cell Absolute Count	Weighted mode	4	0.0293973	0.0439301	0.551272	-0.0567057	0.1155	1.02983	0.944872	1.12243
ebi-a-GCST90001597	Q4qTY6	ad	CD8dim T cell %T cell	Weighted mode	3	0.0221853	0.0377604	0.616346	-0.051825	0.0961956	1.02243	0.949495	1.10097
ebi-a-GCST90001599	7sy6SK	ad	CD4-CD8- T cell %T cell	Weighted mode	3	-0.0514396	0.043323	0.356995	-0.136353	0.0334736	0.949861	0.872535	1.03404
ebi-a-GCST90001612	fRFj0i	ad	CD8dim T cell %leukocyte	Weighted mode	3	0.0232429	0.0396056	0.616718	-0.054384	0.10087	1.02352	0.947068	1.10613
ebi-a-GCST90001613	nOIUPn	ad	CD4-CD8- T cell %leukocyte	Weighted mode	4	-0.0214418	0.0436876	0.657228	-0.107069	0.0641858	0.978786	0.898463	1.06629
ebi-a-GCST90001614	RFS3VV	ad	CD8+ and CD8dim T cell %leukocyte	Weighted mode	3	-0.0351721	0.0517376	0.566754	-0.136578	0.0662335	0.965439	0.872338	1.06848
ebi-a-GCST90001618	yLtqVh	ad	HLA DR+ T cell Absolute Count	Weighted mode	4	-0.0342355	0.0196955	0.180557	-0.0728388	0.00436771	0.966344	0.929751	1.00438
ebi-a-GCST90001619	OT2s1U	ad	HLA DR+ T cell%T cell	Weighted mode	3	-0.0354637	0.0214236	0.239687	-0.077454	0.00652663	0.965158	0.92547	1.00655
ebi-a-GCST90001620	XPhmnP	ad	HLA DR+ T cell%lymphocyte	Weighted mode	4	-0.0326899	0.0200045	0.200743	-0.0718988	0.00651898	0.967839	0.930625	1.00654
ebi-a-GCST90001621	SkfGaX	ad	Natural Killer T Absolute Count	Weighted mode	6	-0.00326579	0.0664301	0.962694	-0.133469	0.126937	0.99674	0.875055	1.13535
ebi-a-GCST90001622	taPnxW	ad	Natural Killer T %T cell	Weighted mode	7	0.0128458	0.0377231	0.745065	-0.0610915	0.0867831	1.01293	0.940737	1.09066
ebi-a-GCST90001623	TyWwZb	ad	Natural Killer T %lymphocyte	Weighted mode	8	0.0256448	0.0420256	0.560997	-0.0567253	0.108015	1.02598	0.944854	1.11406
ebi-a-GCST90001627	FvjD0X	ad	HLA DR+ CD8+ T cell Absolute Count	Weighted mode	3	-0.0329985	0.0224333	0.279125	-0.0769677	0.0109707	0.96754	0.92592	1.01103
ebi-a-GCST90001628	CZnCbS	ad	HLA DR+ CD8+ T cell %T cell	Weighted mode	3	-0.0327571	0.0203929	0.249442	-0.0727273	0.00721298	0.967774	0.929854	1.00724
ebi-a-GCST90001633	WMki1I	ad	CD8dim Natural Killer T Absolute Count	Weighted mode	7	-0.00976209	0.0334387	0.780164	-0.0753019	0.0557777	0.990285	0.927463	1.05736
ebi-a-GCST90001634	c5ihPF	ad	CD8dim Natural Killer T %T cell	Weighted mode	7	-0.00923996	0.031321	0.777929	-0.0706292	0.0521492	0.990803	0.931807	1.05353
ebi-a-GCST90001635	Qz4jAp	ad	CD8dim Natural Killer T %lymphocyte	Weighted mode	8	-0.00651011	0.0313571	0.841443	-0.0679701	0.0549499	0.993511	0.934288	1.05649
ebi-a-GCST90001637	SkjLbo	ad	CD4-CD8- Natural Killer T %T cell	Weighted mode	8	-0.00572024	0.0320695	0.863485	-0.0685765	0.057136	0.994296	0.933722	1.0588
ebi-a-GCST90001638	iZokvF	ad	CD4-CD8- Natural Killer T %lymphocyte	Weighted mode	8	-0.0101732	0.04026	0.807769	-0.0890828	0.0687364	0.989878	0.91477	1.07115
ebi-a-GCST90001643	sX3IRp	ad	B cell %CD3- lymphocyte	Weighted mode	3	0.00351079	0.0128059	0.809687	-0.0215888	0.0286104	1.00352	0.978643	1.02902
ebi-a-GCST90001645	i9oIQ2	ad	Natural Killer Absolute Count	Weighted mode	3	-0.00614199	0.0384313	0.887707	-0.0814674	0.0691834	0.993877	0.921763	1.07163
ebi-a-GCST90001646	UwptDb	ad	Natural Killer %CD3- lymphocyte	Weighted mode	5	-0.00571584	0.0132027	0.687388	-0.0315932	0.0201615	0.9943	0.968901	1.02037
ebi-a-GCST90001647	zL0NOo	ad	Natural Killer %lymphocyte	Weighted mode	3	-0.0193125	0.0314484	0.601696	-0.0809514	0.0423263	0.980873	0.922239	1.04323
ebi-a-GCST90001648	9hUFdp	ad	HLA DR+ Natural Killer Absolute Count	Weighted mode	3	-0.0311417	0.0176071	0.218971	-0.0656517	0.0033683	0.969338	0.936457	1.00337
ebi-a-GCST90001649	yQSMZ4	ad	HLA DR+ Natural Killer %Natural Killer	Weighted mode	5	-0.0314158	0.018025	0.156306	-0.0667448	0.00391312	0.969073	0.935434	1.00392
ebi-a-GCST90001650	tyeslR	ad	HLA DR+ Natural Killer %CD3- lymphocyte	Weighted mode	4	-0.0333283	0.0165543	0.137547	-0.0657747	-0.000882	0.967221	0.936342	0.999118
ebi-a-GCST90001658	Krwzz5	ad	CD39+ CD4+ T cell %T cell	Weighted mode	17	-0.00846304	0.0201768	0.680469	-0.0480096	0.0310835	0.991573	0.953125	1.03157
ebi-a-GCST90001659	BKpbIM	ad	CD39+ CD4+ T cell %CD4+ T cell	Weighted mode	15	-0.00434688	0.0187745	0.820252	-0.041145	0.0324512	0.995663	0.95969	1.03298
ebi-a-GCST90001660	pP5Dcn	ad	CD39+ CD4+ T cell Absolute Count	Weighted mode	17	-0.016162	0.0183122	0.390529	-0.0520539	0.0197298	0.983968	0.949278	1.01993
ebi-a-GCST90001661	ZNm3YD	ad	CD28- CD8dim T cell %T cell	Weighted mode	3	0.11357	0.0652489	0.223887	-0.0143179	0.241458	1.12027	0.985784	1.2731
ebi-a-GCST90001664	yhX3Ox	ad	CD28+ CD45RA+ CD8dim T cell %T cell	Weighted mode	8	0.0169645	0.00981182	0.127438	-0.00226666	0.0361957	1.01711	0.997736	1.03686
ebi-a-GCST90001665	wSlFn2	ad	CD28+ CD45RA+ CD8dim T cell %CD8dim T cell	Weighted mode	7	0.0159128	0.0099649	0.161404	-0.00361838	0.035444	1.01604	0.996388	1.03608
ebi-a-GCST90001666	H2AkZd	ad	CD28+ CD45RA+ CD8dim T cell Absolute Count	Weighted mode	8	0.00241235	0.00633042	0.714451	-0.00999526	0.01482	1.00242	0.990055	1.01493
ebi-a-GCST90001667	EslJm1	ad	CD28+ CD45RA- CD8dim T cell %T cell	Weighted mode	4	-0.0123354	0.0139958	0.44302	-0.0397673	0.0150965	0.98774	0.961013	1.01521
ebi-a-GCST90001668	StXSda	ad	CD28+ CD45RA- CD8dim T cell %CD8dim T cell	Weighted mode	3	-0.0171925	0.0142379	0.350658	-0.0450988	0.0107139	0.982954	0.955903	1.01077
ebi-a-GCST90001669	Q0WfNi	ad	CD28+ CD45RA- CD8dim T cell Absolute Count	Weighted mode	4	-0.0181974	0.0143804	0.295066	-0.0463829	0.00998815	0.981967	0.954676	1.01004
ebi-a-GCST90001670	UavKZX	ad	CD39+ CD8+ T cell %T cell	Weighted mode	20	-0.0461216	0.0194011	0.0281007	-0.0841478	-0.00809546	0.954926	0.919295	0.991937
ebi-a-GCST90001671	ExZWJp	ad	CD39+ CD8+ T cell %CD8+ T cell	Weighted mode	16	-0.0501712	0.0215162	0.0340618	-0.092343	-0.00799947	0.951067	0.911792	0.992032
ebi-a-GCST90001672	lHSzKD	ad	CD39+ CD8+ T cell Absolute Count	Weighted mode	21	-0.0462032	0.0212019	0.0414454	-0.087759	-0.00464745	0.954848	0.915982	0.995363
ebi-a-GCST90001681	EvJJ4d	ad	CD25++ CD8+ T cell Absolute Count	Weighted mode	3	0.00966736	0.0262232	0.74775	-0.0417301	0.0610649	1.00971	0.959129	1.06297
ebi-a-GCST90001686	KoHNTO	ad	CD28- CD8+ T cell %CD8+ T cell	Weighted mode	4	0.102154	0.0566309	0.169026	-0.00884251	0.213151	1.10755	0.991196	1.23757
ebi-a-GCST90001687	IGqHSv	ad	CD28- CD8+ T cell Absolute Count	Weighted mode	3	0.0516124	0.0507636	0.416268	-0.0478843	0.151109	1.05297	0.953244	1.16312
ebi-a-GCST90001688	MFiGXg	ad	CD28+ CD45RA+ CD8+ T cell %T cell	Weighted mode	33	0.00317677	0.00212179	0.144138	-0.000982	0.00733548	1.00318	0.999019	1.00736
ebi-a-GCST90001691	op7QIN	ad	CD28+ CD45RA- CD8+ T cell %T cell	Weighted mode	6	-0.0114032	0.0109695	0.346187	-0.0329034	0.010097	0.988662	0.967632	1.01015
ebi-a-GCST90001692	L2jPqP	ad	CD28+ CD45RA- CD8+ T cell %CD8+ T cell	Weighted mode	6	-0.0223869	0.0115825	0.11109	-0.0450887	0.000315	0.977862	0.955913	1.00031
ebi-a-GCST90001693	OH9M7q	ad	CD28+ CD45RA- CD8+ T cell Absolute Count	Weighted mode	4	-0.0176754	0.0121526	0.241805	-0.0414944	0.00614367	0.98248	0.959355	1.00616
ebi-a-GCST90001694	Ri4C9R	ad	CD28- CD4-CD8- T cell %T cell	Weighted mode	3	-0.0477134	0.0520307	0.455936	-0.149694	0.0542668	0.953407	0.860972	1.05577
ebi-a-GCST90001695	Ghux4b	ad	CD45RA- CD28- CD8+ T cell Absolute Count	Weighted mode	131	1.07e-05	9.2e-06	0.24714	-7.34e-06	2.87e-05	1.00001	0.999993	1.00003
ebi-a-GCST90001696	aau4wS	ad	CD45RA- CD28- CD8+ T cell %CD8+ T cell	Weighted mode	11	0.000718	0.000437	0.131143	-0.000138	0.00157443	1.00072	0.999862	1.00158
ebi-a-GCST90001697	wvoDUT	ad	CD45RA- CD28- CD8+ T cell %T cell	Weighted mode	36	0.00106263	0.000387	0.00945771	0.000304	0.00182106	1.00106	1.0003	1.00182
ebi-a-GCST90001698	NK6OFS	ad	CD45RA+ CD28- CD8+ T cell Absolute Count	Weighted mode	540	8.03e-07	3.69e-06	0.827722	-6.42e-06	8.03e-06	1	0.999994	1.00001
ebi-a-GCST90001700	RLghpz	ad	CD45RA+ CD28- CD8+ T cell %T cell	Weighted mode	69	0.000293	0.000154	0.0608523	-8.27e-06	0.000594	1.00029	0.999992	1.00059
ebi-a-GCST90001702	UyR7CG	ad	BAFF-R on CD24+ CD27+ B cell	Weighted mode	22	-0.00155613	0.00991649	0.876804	-0.0209924	0.0178802	0.998445	0.979226	1.01804
ebi-a-GCST90001703	sTEWnR	ad	BAFF-R on IgD+ CD24+ B cell	Weighted mode	18	-0.00135577	0.00941258	0.887164	-0.0198044	0.0170929	0.998645	0.98039	1.01724
ebi-a-GCST90001704	g2OkhP	ad	BAFF-R on IgD+ CD24- B cell	Weighted mode	25	-0.00529643	0.0086397	0.54562	-0.0222302	0.0116374	0.994718	0.978015	1.01171
ebi-a-GCST90001705	MGSGAo	ad	BAFF-R on IgD+ CD38- B cell	Weighted mode	19	-0.00155431	0.00949797	0.871833	-0.0201703	0.0170617	0.998447	0.980032	1.01721
ebi-a-GCST90001706	Vumo5g	ad	BAFF-R on IgD+ CD38- naive B cell	Weighted mode	12	-0.0133817	0.0219632	0.554716	-0.0564295	0.0296662	0.986707	0.945133	1.03011
ebi-a-GCST90001707	IDCSt9	ad	BAFF-R on IgD+ CD38- unswitched memory B cell	Weighted mode	14	-0.000696	0.00970683	0.943939	-0.0197213	0.0183295	0.999304	0.980472	1.0185
ebi-a-GCST90001708	OSYpbN	ad	BAFF-R on IgD+ CD38+ B cell	Weighted mode	22	-0.00360371	0.00992794	0.720243	-0.0230625	0.0158551	0.996403	0.977201	1.01598
ebi-a-GCST90001709	4TXFZz	ad	BAFF-R on IgD+ CD38dim B cell	Weighted mode	26	-0.00613412	0.00914493	0.508519	-0.0240582	0.01179	0.993885	0.976229	1.01186
ebi-a-GCST90001710	GZ1QSI	ad	BAFF-R on IgD- CD24- B cell	Weighted mode	21	9.4e-05	0.0102111	0.992748	-0.0199197	0.0201077	1.00009	0.980277	1.02031
ebi-a-GCST90001711	rO181c	ad	BAFF-R on IgD- CD27- B cell	Weighted mode	22	-0.000134	0.00984875	0.989272	-0.0194376	0.0191695	0.999866	0.98075	1.01935
ebi-a-GCST90001712	pTTNJ3	ad	BAFF-R on IgD- CD38- B cell	Weighted mode	23	-0.000853	0.00950941	0.929325	-0.0194916	0.0177853	0.999147	0.980697	1.01794
ebi-a-GCST90001713	qvPMAY	ad	BAFF-R on IgD- CD38+ B cell	Weighted mode	3	-0.0093496	0.0287027	0.775544	-0.0656068	0.0469076	0.990694	0.936499	1.04803
ebi-a-GCST90001715	Rgbbut	ad	BAFF-R on memory B cell	Weighted mode	19	-0.000437	0.00973696	0.964693	-0.0195215	0.0186474	0.999563	0.980668	1.01882
ebi-a-GCST90001716	WmlwfO	ad	BAFF-R on naive-mature B cell	Weighted mode	25	-0.00505368	0.00893681	0.576989	-0.0225698	0.0124625	0.994959	0.977683	1.01254
ebi-a-GCST90001717	oG6epC	ad	BAFF-R on unswitched memory B cell	Weighted mode	19	-0.000899	0.00990053	0.928613	-0.0203045	0.0185055	0.999101	0.9799	1.01868
ebi-a-GCST90001718	ArmzsW	ad	BAFF-R on switched memory B cell	Weighted mode	23	-0.00132707	0.00949544	0.890122	-0.0199381	0.017284	0.998674	0.980259	1.01743
ebi-a-GCST90001719	hizsJo	ad	BAFF-R on IgD+ B cell	Weighted mode	25	-0.00504909	0.00924791	0.590125	-0.023175	0.0130768	0.994964	0.977091	1.01316
ebi-a-GCST90001720	UkK0i7	ad	BAFF-R on transitional B cell	Weighted mode	17	-0.00360763	0.010911	0.745205	-0.0249932	0.0177779	0.996399	0.975317	1.01794
ebi-a-GCST90001724	rcSXY5	ad	CD19 on IgD+ CD24+ B cell	Weighted mode	3	0.0256618	0.0661536	0.735475	-0.103999	0.155323	1.02599	0.901226	1.16804
ebi-a-GCST90001725	mbMbrU	ad	CD19 on IgD+ CD24- B cell	Weighted mode	3	0.0277678	0.0549569	0.663552	-0.0799477	0.135483	1.02816	0.923165	1.14509
ebi-a-GCST90001728	ra8uOq	ad	CD19 on IgD+ CD38- unswitched memory B cell	Weighted mode	3	0.0106642	0.0420454	0.823469	-0.0717447	0.0930732	1.01072	0.930768	1.09754
ebi-a-GCST90001729	XSC2g4	ad	CD19 on IgD+ CD38+ B cell	Weighted mode	5	-0.00582727	0.0216731	0.801327	-0.0483065	0.036652	0.99419	0.952842	1.03733
ebi-a-GCST90001730	ksHgIT	ad	CD19 on IgD+ CD38dim B cell	Weighted mode	3	0.0139351	0.0546479	0.82255	-0.0931746	0.121045	1.01403	0.911034	1.12868
ebi-a-GCST90001738	DC0cEY	ad	CD19 on unswitched memory B cell	Weighted mode	3	0.014641	0.0579494	0.824133	-0.0989398	0.128222	1.01475	0.905797	1.13681
ebi-a-GCST90001742	lYtTiw	ad	CD19 on transitional B cell	Weighted mode	3	0.0134856	0.0538341	0.825582	-0.0920292	0.119	1.01358	0.912079	1.12637
ebi-a-GCST90001743	DyL8uW	ad	CD20 on B cell	Weighted mode	3	-0.00818651	0.0433456	0.867627	-0.0931439	0.0767709	0.991847	0.911062	1.07979
ebi-a-GCST90001745	LFPYca	ad	CD20 on CD24+ CD27+ B cell	Weighted mode	4	0.0616194	0.0331071	0.159638	-0.00327059	0.126509	1.06356	0.996735	1.13486
ebi-a-GCST90001747	125171	ad	CD20 on IgD+ CD24- B cell	Weighted mode	3	-0.00597727	0.0424555	0.900937	-0.08919	0.0772354	0.994041	0.914672	1.0803
ebi-a-GCST90001748	oIdGqK	ad	CD20 on IgD+ CD38- B cell	Weighted mode	3	0.0606461	0.0524128	0.366762	-0.042083	0.163375	1.06252	0.95879	1.17748
ebi-a-GCST90001751	9v3Tyv	ad	CD20 on IgD+ CD38+ B cell	Weighted mode	4	0.016727	0.029962	0.615616	-0.0419985	0.0754524	1.01687	0.958871	1.07837
ebi-a-GCST90001752	Jr80cm	ad	CD20 on IgD+ CD38dim B cell	Weighted mode	5	-0.00110796	0.0342806	0.975765	-0.068298	0.066082	0.998893	0.933982	1.06831
ebi-a-GCST90001754	xiOVII	ad	CD20 on IgD- CD27- B cell	Weighted mode	4	0.0314734	0.0466411	0.548154	-0.0599432	0.12289	1.03197	0.941818	1.13076
ebi-a-GCST90001755	tl4mFu	ad	CD20 on IgD- CD38- B cell	Weighted mode	4	0.0712043	0.0376812	0.155208	-0.00265088	0.145059	1.0738	0.997353	1.15611
ebi-a-GCST90001757	HdFOLd	ad	CD20 on IgD- CD38dim B cell	Weighted mode	7	0.057795	0.0306955	0.108724	-0.00236813	0.117958	1.0595	0.997635	1.1252
ebi-a-GCST90001758	44y7VH	ad	CD20 on memory B cell	Weighted mode	3	0.0874815	0.0510839	0.228935	-0.0126429	0.187606	1.09142	0.987437	1.20636
ebi-a-GCST90001759	sDvfYS	ad	CD20 on naive-mature B cell	Weighted mode	3	-0.0146608	0.0379664	0.736593	-0.089075	0.0597534	0.985446	0.914777	1.06157
ebi-a-GCST90001760	zuPhrD	ad	CD20 on unswitched memory B cell	Weighted mode	4	0.0615951	0.040342	0.224243	-0.0174752	0.140665	1.06353	0.982677	1.15104
ebi-a-GCST90001761	IxX3Yk	ad	CD20 on switched memory B cell	Weighted mode	7	0.0535532	0.0283665	0.107965	-0.00204508	0.109152	1.05501	0.997957	1.11533
ebi-a-GCST90001762	E9pG3r	ad	CD20 on IgD+ B cell	Weighted mode	3	-0.00692415	0.0358344	0.864626	-0.0771597	0.0633114	0.9931	0.925742	1.06536
ebi-a-GCST90001765	9pictr	ad	CD24 on IgD+ CD24+ B cell	Weighted mode	3	-0.0352401	0.0212971	0.239816	-0.0769825	0.00650228	0.965374	0.925906	1.00652
ebi-a-GCST90001771	Wku3IT	ad	CD24 on memory B cell	Weighted mode	3	-0.0322133	0.0214625	0.272186	-0.0742799	0.00985329	0.9683	0.928412	1.0099
ebi-a-GCST90001775	Shf4sD	ad	CD25 on B cell	Weighted mode	3	-0.0397168	0.0324307	0.34537	-0.103281	0.0238474	0.961062	0.901873	1.02413
ebi-a-GCST90001777	pVErsF	ad	CD25 on CD24+ CD27+ B cell	Weighted mode	3	0.00728354	0.0248107	0.796751	-0.0413454	0.0559124	1.00731	0.959498	1.05751
ebi-a-GCST90001779	Z24Y33	ad	CD25 on IgD+ CD24- B cell	Weighted mode	4	-0.0257646	0.026142	0.397015	-0.0770029	0.0254738	0.974565	0.925887	1.0258
ebi-a-GCST90001784	RHDFjB	ad	CD25 on IgD+ CD38dim B cell	Weighted mode	3	-0.0241845	0.0321461	0.530343	-0.087191	0.0388219	0.976106	0.916502	1.03959
ebi-a-GCST90001787	CD8zrZ	ad	CD25 on IgD- CD38- B cell	Weighted mode	3	0.0448359	0.0273995	0.243401	-0.00886709	0.0985389	1.04586	0.991172	1.10356
ebi-a-GCST90001789	7UNlHL	ad	CD25 on IgD- CD38dim B cell	Weighted mode	3	-0.0385367	0.0298531	0.325834	-0.0970487	0.0199754	0.962196	0.907512	1.02018
ebi-a-GCST90001790	iyyyfx	ad	CD25 on memory B cell	Weighted mode	3	0.00767261	0.0219604	0.760159	-0.0353697	0.050715	1.0077	0.965248	1.05202
ebi-a-GCST90001791	JcCvBn	ad	CD25 on naive-mature B cell	Weighted mode	4	-0.0322305	0.0268189	0.315663	-0.0847955	0.0203344	0.968283	0.9187	1.02054
ebi-a-GCST90001792	0whGPu	ad	CD25 on unswitched memory B cell	Weighted mode	3	0.00748754	0.0234461	0.779731	-0.0384668	0.0534419	1.00752	0.962264	1.0549
ebi-a-GCST90001798	YdA0Qm	ad	CD27 on CD24+ CD27+ B cell	Weighted mode	11	-0.0105322	0.0154221	0.510163	-0.0407595	0.0196951	0.989523	0.96006	1.01989
ebi-a-GCST90001800	SisK8F	ad	CD27 on IgD+ CD24+ B cell	Weighted mode	7	-0.0130516	0.0169063	0.469423	-0.0461878	0.0200847	0.987033	0.954863	1.02029
ebi-a-GCST90001801	zJJZ7T	ad	CD27 on IgD+ CD38- unswitched memory B cell	Weighted mode	4	-0.0125893	0.0160112	0.48909	-0.0439713	0.0187926	0.98749	0.956981	1.01897
ebi-a-GCST90001802	rwzTLV	ad	CD27 on IgD- CD38- B cell	Weighted mode	7	-0.0175645	0.0189561	0.38989	-0.0547185	0.0195895	0.982589	0.946752	1.01978
ebi-a-GCST90001804	1Vq6c5	ad	CD27 on IgD- CD38dim B cell	Weighted mode	9	-0.0113546	0.0134255	0.422267	-0.0376685	0.0149594	0.98871	0.963032	1.01507
ebi-a-GCST90001805	6XfMp6	ad	CD27 on memory B cell	Weighted mode	8	-0.00816632	0.0179873	0.663567	-0.0434214	0.0270887	0.991867	0.957508	1.02746
ebi-a-GCST90001806	xVsu9U	ad	CD27 on unswitched memory B cell	Weighted mode	10	-0.0129851	0.0196572	0.525427	-0.0515132	0.0255429	0.987099	0.949791	1.02587
ebi-a-GCST90001808	mulhyR	ad	CD27 on switched memory B cell	Weighted mode	10	-0.0130655	0.0150654	0.408334	-0.0425937	0.0164628	0.98702	0.958301	1.0166
ebi-a-GCST90001813	2dwq4s	ad	CD38 on IgD+ CD38dim B cell	Weighted mode	4	0.0288897	0.0333577	0.45017	-0.0364915	0.0942708	1.02931	0.964166	1.09886
ebi-a-GCST90001815	hOt64P	ad	CD38 on IgD- CD38dim B cell	Weighted mode	4	0.028611	0.0367015	0.492498	-0.043324	0.100546	1.02902	0.957601	1.10577
ebi-a-GCST90001816	sDiMPv	ad	CD38 on naive-mature B cell	Weighted mode	4	0.0337941	0.0360021	0.417148	-0.0367701	0.104358	1.03437	0.963898	1.11
ebi-a-GCST90001819	1aqFBG	ad	CD38 on transitional B cell	Weighted mode	5	0.00904945	0.0315473	0.78847	-0.0527833	0.0708822	1.00909	0.948586	1.07345
ebi-a-GCST90001820	4SOoW3	ad	IgD on IgD+ CD24+ B cell	Weighted mode	6	0.0881788	0.0894131	0.369325	-0.0870709	0.263429	1.09218	0.916612	1.30138
ebi-a-GCST90001821	jyTpWf	ad	IgD on IgD+ CD24- B cell	Weighted mode	3	0.0181819	0.038131	0.680504	-0.0565549	0.0929187	1.01835	0.945015	1.09737
ebi-a-GCST90001825	lSRUwW	ad	IgD on IgD+ CD38dim B cell	Weighted mode	3	0.0177335	0.0379662	0.686382	-0.0566802	0.0921472	1.01789	0.944896	1.09653
ebi-a-GCST90001826	EKyMwD	ad	IgD on unswitched memory B cell	Weighted mode	6	0.107982	0.0592732	0.128118	-0.00819384	0.224157	1.11403	0.99184	1.25127
ebi-a-GCST90001828	zyLT6t	ad	IgD on transitional B cell	Weighted mode	3	0.034037	0.0455985	0.533212	-0.0553361	0.12341	1.03462	0.946167	1.13135
ebi-a-GCST90001829	3zttjK	ad	BAFF-R on B cell	Weighted mode	21	-0.00569681	0.00941459	0.551914	-0.0241494	0.0127558	0.994319	0.97614	1.01284
ebi-a-GCST90001838	sigCzA	ad	CD3 on naive CD8+ T cell	Weighted mode	8	0.0308636	0.0116902	0.0334177	0.00795076	0.0537765	1.03134	1.00798	1.05525
ebi-a-GCST90001839	HWkBXe	ad	CD3 on Effector Memory CD8+ T cell	Weighted mode	3	0.0489759	0.0222137	0.158278	0.00543699	0.0925147	1.05019	1.00545	1.09693
ebi-a-GCST90001841	1992Pl	ad	CD3 on Central Memory CD4+ T cell	Weighted mode	5	0.0294491	0.013814	0.100001	0.00237372	0.0565244	1.02989	1.00238	1.05815
ebi-a-GCST90001842	5j1tK6	ad	CD3 on Naive CD4+ T cell	Weighted mode	6	0.0241724	0.0114485	0.0884652	0.00173326	0.0466115	1.02447	1.00173	1.04771
ebi-a-GCST90001845	r5XEfg	ad	CD3 on CD45RA- CD4+ T cell	Weighted mode	4	0.0336997	0.0150741	0.111416	0.00415435	0.063245	1.03427	1.00416	1.06529
ebi-a-GCST90001846	jE5yV2	ad	CD3 on Central Memory CD8+ T cell	Weighted mode	4	0.0386523	0.0193198	0.139238	0.000785	0.0765192	1.03941	1.00079	1.07952
ebi-a-GCST90001851	NJLPtH	ad	CD3 on T cell	Weighted mode	3	0.0451889	0.0210834	0.165321	0.00386545	0.0865124	1.04623	1.00387	1.09036
ebi-a-GCST90001853	ZOK01v	ad	CD3 on activated CD4 regulatory T cell	Weighted mode	6	0.0261874	0.0131894	0.103847	0.000336	0.0520386	1.02653	1.00034	1.05342
ebi-a-GCST90001854	IJXpij	ad	CD3 on CD39+ activated CD4 regulatory T cell	Weighted mode	6	0.0282387	0.0143049	0.105376	0.000201	0.0562763	1.02864	1.0002	1.05789
ebi-a-GCST90001855	Lik0Gb	ad	CD3 on secreting CD4 regulatory T cell	Weighted mode	4	0.0285387	0.014215	0.138299	0.000677	0.0564001	1.02895	1.00068	1.05802
ebi-a-GCST90001856	5AfbTE	ad	CD3 on CD39+ secreting CD4 regulatory T cell	Weighted mode	5	0.0265924	0.0147083	0.144886	-0.0022358	0.0554205	1.02695	0.997767	1.05699
ebi-a-GCST90001857	Ldoexc	ad	CD3 on activated & secreting CD4 regulatory T cell	Weighted mode	6	0.0258068	0.0131149	0.10623	0.000102	0.051512	1.02614	1.0001	1.05286
ebi-a-GCST90001858	gIrbgk	ad	CD3 on CD45RA+ CD4+ T cell	Weighted mode	8	0.0257787	0.0128325	0.084507	0.000627	0.0509304	1.02611	1.00063	1.05225
ebi-a-GCST90001859	qiAGRL	ad	CD3 on CD8+ T cell	Weighted mode	3	0.0444088	0.0195597	0.151195	0.00607187	0.0827458	1.04541	1.00609	1.08627
ebi-a-GCST90001860	SiaogK	ad	CD3 on CD39+ CD4+ T cell	Weighted mode	5	0.0257941	0.012318	0.104357	0.00165072	0.0499374	1.02613	1.00165	1.05121
ebi-a-GCST90001861	zJI4Wu	ad	CD3 on CD28+ CD4+ T cell	Weighted mode	3	0.0426565	0.017019	0.129073	0.0092993	0.0760138	1.04358	1.00934	1.07898
ebi-a-GCST90001863	AlFkgi	ad	CD3 on CD28+ CD45RA- CD8+ T cell	Weighted mode	5	0.0426063	0.0219743	0.124533	-0.000463	0.085676	1.04353	0.999537	1.08945
ebi-a-GCST90001864	YzQcl2	ad	CD3 on CD28+ CD45RA+ CD8+ T cell	Weighted mode	7	0.0301239	0.0128087	0.0569156	0.00501887	0.0552289	1.03058	1.00503	1.05678
ebi-a-GCST90001867	r5hrIY	ad	CD3 on CD4+ T cell	Weighted mode	3	0.0457015	0.0323302	0.293051	-0.0176658	0.109069	1.04676	0.982489	1.11524
ebi-a-GCST90001868	JJXyZv	ad	CD3 on CD4 regulatory T cell	Weighted mode	5	0.0263283	0.0123881	0.10074	0.00204764	0.050609	1.02668	1.00205	1.05191
ebi-a-GCST90001869	WbXu6p	ad	CD3 on resting CD4 regulatory T cell	Weighted mode	7	-0.0200362	0.0177891	0.303053	-0.0549028	0.0148304	0.980163	0.946577	1.01494
ebi-a-GCST90001870	aq3DI1	ad	CD34 on Hematopoietic Stem Cell	Weighted mode	4	0.0169427	0.0354835	0.665649	-0.0526049	0.0864903	1.01709	0.948755	1.09034
ebi-a-GCST90001883	DrHRbu	ad	CD16-CD56 on Natural Killer T	Weighted mode	7	0.00552746	0.0275112	0.847402	-0.0483946	0.0594495	1.00554	0.952758	1.06125
ebi-a-GCST90001884	uH5Eyv	ad	CD16-CD56 on Natural Killer	Weighted mode	9	-0.0295333	0.0227054	0.229569	-0.0740359	0.0149692	0.970898	0.928638	1.01508
ebi-a-GCST90001886	erpCXO	ad	CD28 on CD39+ activated CD4 regulatory T cell	Weighted mode	3	-0.0182148	0.0433784	0.715364	-0.103236	0.0668068	0.98195	0.901914	1.06909
ebi-a-GCST90001887	vM22Za	ad	CD28 on secreting CD4 regulatory T cell	Weighted mode	4	-0.0104699	0.0230953	0.681091	-0.0557368	0.034797	0.989585	0.945788	1.03541
ebi-a-GCST90001891	5uRLx9	ad	CD28 on CD45RA- CD4 not regulatory T cell	Weighted mode	3	-0.0115711	0.0205936	0.630768	-0.0519346	0.0287924	0.988496	0.949391	1.02921
ebi-a-GCST90001892	D3LvOB	ad	CD28 on CD39+ CD4+ T cell	Weighted mode	8	0.0319883	0.0139492	0.0555449	0.00464787	0.0593287	1.03251	1.00466	1.06112
ebi-a-GCST90001894	8ML4BV	ad	CD28 on CD28+ CD4+ T cell	Weighted mode	3	-0.0121976	0.0217063	0.630734	-0.054742	0.0303468	0.987877	0.946729	1.03081
ebi-a-GCST90001898	OHx3fW	ad	CD28 on CD4+ T cell	Weighted mode	3	-0.0128989	0.022647	0.626419	-0.0572871	0.0314893	0.987184	0.944323	1.03199
ebi-a-GCST90001907	j4dGKn	ad	CCR7 on naive CD4+ T cell	Weighted mode	4	-0.0161284	0.0490394	0.763862	-0.112246	0.0799887	0.984001	0.893825	1.08327
ebi-a-GCST90001926	iDhplJ	ad	CD127 on granulocyte	Weighted mode	8	-0.0333993	0.0289654	0.286729	-0.0901715	0.0233729	0.967152	0.913774	1.02365
ebi-a-GCST90001932	kMnbXz	ad	CD127 on CD45RA+ CD4+ T cell	Weighted mode	4	0.0859673	0.0475992	0.168653	-0.00732713	0.179262	1.08977	0.9927	1.19633
ebi-a-GCST90001946	VGlAAY	ad	CD33 on CD14+ monocyte	Weighted mode	8	0.0281139	0.00878329	0.0150484	0.0108986	0.0453291	1.02851	1.01096	1.04637
ebi-a-GCST90001947	UEHLz0	ad	CD33 on CD33+ HLA DR+ CD14dim	Weighted mode	6	0.0279679	0.00809566	0.0181458	0.0121005	0.0438354	1.02836	1.01217	1.04481
ebi-a-GCST90001948	0pUxFy	ad	CD33 on CD33dim HLA DR+ CD11b+	Weighted mode	7	0.0285669	0.00830032	0.0137728	0.0122983	0.0448356	1.02898	1.01237	1.04586
ebi-a-GCST90001949	5td6iy	ad	CD33 on CD33dim HLA DR+ CD11b-	Weighted mode	7	0.0282196	0.00797158	0.0122186	0.0125953	0.0438439	1.02862	1.01267	1.04482
ebi-a-GCST90001950	MjVxTn	ad	CD33 on Granulocytic Myeloid-Derived Suppressor Cells	Weighted mode	3	0.0336507	0.0114286	0.098583	0.0112506	0.0560507	1.03422	1.01131	1.05765
ebi-a-GCST90001951	RCNrSy	ad	CD33 on CD66b++ myeloid cell	Weighted mode	6	0.0349345	0.00985175	0.016457	0.015625	0.0542439	1.03555	1.01575	1.05574
ebi-a-GCST90001952	horFa4	ad	CD33 on Monocytic Myeloid-Derived Suppressor Cells	Weighted mode	4	0.0289415	0.00866879	0.0444344	0.0119506	0.0459323	1.02936	1.01202	1.047
ebi-a-GCST90001953	lWHSCu	ad	CD33 on CD33dim HLA DR-	Weighted mode	5	0.0291638	0.00809428	0.0226973	0.013299	0.0450286	1.02959	1.01339	1.04606
ebi-a-GCST90001954	dcPQXI	ad	CD33 on basophil	Weighted mode	8	0.0242635	0.0082512	0.0216947	0.00809114	0.0404358	1.02456	1.00812	1.04126
ebi-a-GCST90001955	gjui1T	ad	CD33 on Immature Myeloid-Derived Suppressor Cells	Weighted mode	6	0.0249662	0.0081525	0.0280255	0.00898726	0.0409451	1.02528	1.00903	1.04179
ebi-a-GCST90001956	WhwnGC	ad	CD33 on CD33+ HLA DR+	Weighted mode	5	0.0276286	0.00776443	0.0236208	0.0124103	0.0428469	1.02801	1.01249	1.04378
ebi-a-GCST90001957	SvpGGr	ad	CD33 on CD33+ HLA DR+ CD14-	Weighted mode	5	0.0271907	0.00759977	0.0232125	0.0122952	0.0420863	1.02756	1.01237	1.04298
ebi-a-GCST90001961	z1wfSc	ad	CD25 on CD39+ CD4+ T cell	Weighted mode	9	-0.0279996	0.0113125	0.0384041	-0.0501721	-0.00582705	0.972389	0.951066	0.99419
ebi-a-GCST90001963	3PbSJY	ad	FSC-A on myeloid Dendritic Cell	Weighted mode	3	-0.0380799	0.0264624	0.286773	-0.0899462	0.0137865	0.962636	0.91398	1.01388
ebi-a-GCST90001964	hUaYb5	ad	FSC-A on plasmacytoid Dendritic Cell	Weighted mode	4	-0.0611778	0.0593206	0.378258	-0.177446	0.0550906	0.940656	0.837406	1.05664
ebi-a-GCST90001969	01dGA9	ad	FSC-A on Natural Killer	Weighted mode	3	-0.0105834	0.0307803	0.763753	-0.0709128	0.049746	0.989472	0.931543	1.051
ebi-a-GCST90001970	lWKfKG	ad	FSC-A on HLA DR+ Natural Killer	Weighted mode	3	-0.0441482	0.0223684	0.187132	-0.0879902	-0.000306	0.956812	0.91577	0.999694
ebi-a-GCST90001979	5UFIei	ad	CD16 on CD14- CD16+ monocyte	Weighted mode	10	-0.0244427	0.00934352	0.0279936	-0.042756	-0.00612942	0.975854	0.958145	0.993889
ebi-a-GCST90001980	KHlT5p	ad	CD40 on CD14+ CD16- monocyte	Weighted mode	4	0.0102154	0.012565	0.475739	-0.0144119	0.0348428	1.01027	0.985691	1.03546
ebi-a-GCST90001981	4yOTHe	ad	CD40 on CD14+ CD16+ monocyte	Weighted mode	5	0.0106719	0.0111975	0.394528	-0.0112752	0.032619	1.01073	0.988788	1.03316
ebi-a-GCST90001984	xmVR0J	ad	HLA DR on CD14- CD16+ monocyte	Weighted mode	6	0.0222609	0.0316474	0.513199	-0.039768	0.0842898	1.02251	0.961012	1.08794
ebi-a-GCST90001985	wjYDN3	ad	CD40 on monocytes	Weighted mode	6	0.00709397	0.0105733	0.532005	-0.0136297	0.0278177	1.00712	0.986463	1.02821
ebi-a-GCST90001987	MzuIRj	ad	CD64 on CD14+ CD16- monocyte	Weighted mode	18	0.00439591	0.0158791	0.785243	-0.026727	0.0355189	1.00441	0.973627	1.03616
ebi-a-GCST90001988	b0D2Fn	ad	HLA DR on CD14+ CD16- monocyte	Weighted mode	9	-0.0250239	0.0283463	0.403096	-0.0805827	0.030535	0.975287	0.922579	1.03101
ebi-a-GCST90001989	Iv7prw	ad	CD40 on CD14- CD16+ monocyte	Weighted mode	9	0.0102454	0.0106703	0.365079	-0.0106683	0.0311591	1.0103	0.989388	1.03165
ebi-a-GCST90001991	AY2ICl	ad	HLA DR on CD14+ monocyte	Weighted mode	8	-0.0260181	0.0301415	0.416621	-0.0850955	0.0330593	0.974317	0.918425	1.03361
ebi-a-GCST90002003	ywEqNR	ad	CCR2 on CD14- CD16-	Weighted mode	3	-0.012805	0.0431224	0.794508	-0.097325	0.0717149	0.987277	0.907261	1.07435
ebi-a-GCST90002004	fLNwE0	ad	CCR2 on CD14+ CD16- monocyte	Weighted mode	3	0.0109416	0.0291585	0.743536	-0.046209	0.0680921	1.011	0.954842	1.07046
ebi-a-GCST90002005	2OmrRH	ad	CD16 on CD14+ CD16+ monocyte	Weighted mode	7	-0.0297401	0.0138272	0.0750189	-0.0568413	-0.00263883	0.970698	0.944744	0.997365
ebi-a-GCST90002006	ZA7l6Y	ad	CD64 on monocyte	Weighted mode	17	0.00251543	0.0181853	0.891711	-0.0331277	0.0381585	1.00252	0.967415	1.0389
ebi-a-GCST90002007	C6DjmL	ad	HLA DR on CD14+ CD16+ monocyte	Weighted mode	6	0.00532857	0.0194979	0.795559	-0.0328872	0.0435444	1.00534	0.967648	1.04451
ebi-a-GCST90002009	fbwYOq	ad	HLA DR on CD14- CD16-	Weighted mode	8	-0.00170811	0.0175786	0.925315	-0.0361622	0.032746	0.998293	0.964484	1.03329
ebi-a-GCST90002010	q0KzY4	ad	HLA DR on monocyte	Weighted mode	8	-0.0349365	0.0145571	0.0474683	-0.0634683	-0.00640465	0.965667	0.938504	0.993616
ebi-a-GCST90002024	tJmG9b	ad	CD4 on naive CD4+ T cell	Weighted mode	5	-0.10074	0.0416094	0.072677	-0.182295	-0.0191859	0.904168	0.833356	0.980997
ebi-a-GCST90002030	pvpOdh	ad	CD39 on CD39+ activated CD4 regulatory T cell	Weighted mode	11	-0.0151013	0.0184902	0.433113	-0.0513421	0.0211394	0.985012	0.949954	1.02136
ebi-a-GCST90002031	BVLqAr	ad	CD39 on CD39+ secreting CD4 regulatory T cell	Weighted mode	13	0.0179802	0.00791702	0.0423554	0.00246282	0.0334975	1.01814	1.00247	1.03406
ebi-a-GCST90002032	H3eIir	ad	CD39 on CD39+ CD4+ T cell	Weighted mode	12	0.0184969	0.00812551	0.0438121	0.00257093	0.0344229	1.01867	1.00257	1.03502
ebi-a-GCST90002033	QdHcCq	ad	CD39 on granulocyte	Weighted mode	3	0.1292	0.0597138	0.162945	0.0121606	0.246239	1.13792	1.01223	1.2792
ebi-a-GCST90002035	zgC7mV	ad	CD80 on myeloid Dendritic Cell	Weighted mode	4	0.0788397	0.0431226	0.164954	-0.00568064	0.16336	1.08203	0.994335	1.17746
ebi-a-GCST90002036	iV9Jw1	ad	CD80 on CD62L+ myeloid Dendritic Cell	Weighted mode	3	-0.0391074	0.0527263	0.535538	-0.142451	0.0642361	0.961647	0.86723	1.06634
ebi-a-GCST90002039	4P3SFb	ad	CD80 on monocyte	Weighted mode	7	-0.0117697	0.0236937	0.637043	-0.0582094	0.03467	0.988299	0.943452	1.03528
ebi-a-GCST90002040	SPL66E	ad	CD80 on granulocyte	Weighted mode	3	0.0850481	0.0326069	0.120905	0.0211386	0.148958	1.08877	1.02136	1.16062
ebi-a-GCST90002054	AgixsW	ad	CD8 on Central Memory CD8+ T cell	Weighted mode	3	0.0411174	0.024229	0.231783	-0.00637146	0.0886063	1.04197	0.993649	1.09265
ebi-a-GCST90002056	iwU9Fg	ad	CD8 on Effector Memory CD8+ T cell	Weighted mode	3	-0.0185682	0.0243606	0.525552	-0.0663149	0.0291786	0.981603	0.935836	1.02961
ebi-a-GCST90002061	9eYxmj	ad	CD4 on CD39+ CD4+ T cell	Weighted mode	7	0.0397075	0.0154008	0.0418669	0.00952181	0.0698931	1.04051	1.00957	1.07239
ebi-a-GCST90002067	Mmcx0d	ad	CD4 on CD39+ activated CD4 regulatory T cell	Weighted mode	4	-0.0347464	0.03372	0.378606	-0.100838	0.0313447	0.96585	0.90408	1.03184
ebi-a-GCST90002069	dw9EGN	ad	CD4 on CD39+ secreting CD4 regulatory T cell	Weighted mode	3	0.0672123	0.0284869	0.142277	0.011378	0.123047	1.06952	1.01144	1.13094
ebi-a-GCST90002071	2usnT0	ad	SSC-A on myeloid Dendritic Cell	Weighted mode	4	-0.00188322	0.0351703	0.960663	-0.070817	0.0670506	0.998119	0.931632	1.06935
ebi-a-GCST90002072	hfd37q	ad	SSC-A on plasmacytoid Dendritic Cell	Weighted mode	4	-0.032101	0.0558185	0.605524	-0.141505	0.0773032	0.968409	0.868051	1.08037
ebi-a-GCST90002073	KiodgE	ad	SSC-A on monocyte	Weighted mode	10	-0.00353001	0.0124107	0.782515	-0.0278551	0.020795	0.996476	0.972529	1.02101
ebi-a-GCST90002074	BSLRAj	ad	SSC-A on CD14+ monocyte	Weighted mode	6	-0.00746414	0.0141231	0.619759	-0.0351455	0.0202172	0.992564	0.965465	1.02042
ebi-a-GCST90002077	cOaDt5	ad	SSC-A on HLA DR+ Natural Killer	Weighted mode	4	-0.0410203	0.0212668	0.149336	-0.0827033	0.000663	0.95981	0.920624	1.00066
ebi-a-GCST90002087	99PqZf	ad	CD11c on myeloid Dendritic Cell	Weighted mode	4	0.0381367	0.0303258	0.297536	-0.021302	0.0975753	1.03887	0.978923	1.10249
ebi-a-GCST90002098	kIvnqq	ad	CD45RA on naive CD4+ T cell	Weighted mode	13	0.0156463	0.00956131	0.127692	-0.0030939	0.0343864	1.01577	0.996911	1.03498
ebi-a-GCST90002099	cQKYfQ	ad	CD4RA on Terminally Differentiated CD4+ T cell	Weighted mode	4	0.0199025	0.0146851	0.26834	-0.00888029	0.0486853	1.0201	0.991159	1.04989
ebi-a-GCST90002102	jVVTW2	ad	CD45RA on resting CD4 regulatory T cell	Weighted mode	9	0.0165289	0.00981795	0.130768	-0.00271428	0.0357721	1.01667	0.997289	1.03642
ebi-a-GCST90002104	8U6elL	ad	HLA DR on myeloid Dendritic Cell	Weighted mode	10	-0.098066	0.0151643	0.000116	-0.127788	-0.0683439	0.906589	0.88004	0.933939
ebi-a-GCST90002105	LcvlDq	ad	HLA DR on plasmacytoid Dendritic Cell	Weighted mode	14	0.0221095	0.0546605	0.69243	-0.0850251	0.129244	1.02236	0.918489	1.13797
ebi-a-GCST90002106	HHEXhF	ad	HLA DR on Dendritic Cell	Weighted mode	11	0.0196957	0.023225	0.416252	-0.0258253	0.0652167	1.01989	0.974505	1.06739
ebi-a-GCST90002108	10MYNa	ad	HLA DR on CD33+ HLA DR+ CD14-	Weighted mode	9	-0.0303921	0.0129173	0.0464759	-0.05571	-0.00507423	0.970065	0.945813	0.994939
ebi-a-GCST90002109	iXTkdl	ad	HLA DR on CD33+ HLA DR+ CD14dim	Weighted mode	3	-0.0426072	0.0189151	0.15308	-0.0796807	-0.00553364	0.958288	0.923411	0.994482
ebi-a-GCST90002110	Drm4aJ	ad	HLA DR on CD33dim HLA DR+ CD11b+	Weighted mode	7	0.0236909	0.0539153	0.675749	-0.0819832	0.129365	1.02397	0.921287	1.13811
ebi-a-GCST90002111	ameh1K	ad	HLA DR on CD33dim HLA DR+ CD11b-	Weighted mode	5	0.00733545	0.0321224	0.830566	-0.0556245	0.0702954	1.00736	0.945894	1.07282
ebi-a-GCST90002112	I6OL15	ad	HLA DR on CD33- HLA DR+	Weighted mode	5	-0.00232562	0.0288017	0.939523	-0.058777	0.0541258	0.997677	0.942917	1.05562
ebi-a-GCST90002116	2Wy0f5	ad	HLA DR on B cell	Weighted mode	10	-0.0773094	0.0327334	0.0424768	-0.141467	-0.0131519	0.925603	0.868084	0.986934
ebi-a-GCST90002117	sLwOZ8	ad	HLA DR on HLA DR+ Natural Killer	Weighted mode	5	0.0334652	0.027755	0.294364	-0.0209347	0.087865	1.03403	0.979283	1.09184
ebi-a-GCST90002118	Wx2D2n	ad	CD8 on CD28+ CD45RA- CD8+ T cell	Weighted mode	4	-0.0286138	0.0541111	0.633572	-0.134672	0.0774439	0.971792	0.874003	1.08052
ebi-a-GCST90002119	mK93wi	ad	CD8 on CD28+ CD45RA+ CD8+ T cell	Weighted mode	8	0.0289268	0.0151716	0.0982427	-0.00081	0.0586631	1.02935	0.999191	1.06042
ebi-a-GCST90002120	PDlAI4	ad	CD8 on CD28- CD8+ T cell	Weighted mode	3	0.0574507	0.0352271	0.244494	-0.0115945	0.126496	1.05913	0.988472	1.13484
ebi-a-GCST90002121	1MXJFX	ad	CD8 on CD39+ CD8+ T cell	Weighted mode	4	0.0799431	0.0287856	0.0691522	0.0235234	0.136363	1.08323	1.0238	1.1461

## Sheet: Supplementary Table 3
Supplementary Table 3:FDR-adjusted MR results of all immune traits identified in IVW method derived from European Alzheimer’s and Dementia Biobank (EADB).
id.exposure	id.outcome	outcome	exposure	method	nsnp	b	se	pval	lo_ci	up_ci	or	or_lci95	or_uci95	p-value(adjustd)
ebi-a-GCST90001392	EsDtCu	ad	IgD+ CD38+ B cell Absolute Count	Inverse variance weighted	2	-0.0063211	0.0547617	0.908105	-0.113654	0.101012	0.993699	0.892567	1.10629	0.941167
ebi-a-GCST90001398	fax92k	ad	Unswitched memory B cell Absolute Count	Inverse variance weighted	2	0.0527464	0.268442	0.844226	-0.4734	0.578893	1.05416	0.622881	1.78406	0.921508
ebi-a-GCST90001399	Ure4zi	ad	IgD- CD27- B cell %B cell	Inverse variance weighted	3	0.00571299	0.0268943	0.831776	-0.0469998	0.0584257	1.00573	0.954088	1.06017	0.921508
ebi-a-GCST90001401	PBgnVd	ad	IgD- CD27- B cell Absolute Count	Inverse variance weighted	2	-0.033282	0.0281211	0.236602	-0.0883994	0.0218354	0.967266	0.915395	1.02208	0.607481
ebi-a-GCST90001417	WXoBE0	ad	CD24+ CD27+ B cell %B cell	Inverse variance weighted	3	0.11586	0.0552342	0.0359394	0.0076009	0.224119	1.12284	1.00763	1.25122	0.210221
ebi-a-GCST90001424	o4cpGm	ad	IgD+ B cell %Lymphocyte	Inverse variance weighted	2	0.0585275	0.153767	0.703482	-0.242856	0.359911	1.06027	0.784384	1.4332	0.868212
ebi-a-GCST90001426	UP7M5m	ad	IgD- CD38dim B cell %lymphocyte	Inverse variance weighted	2	-0.0329653	0.0493497	0.504138	-0.129691	0.0637601	0.967572	0.878367	1.06584	0.767126
ebi-a-GCST90001432	7MpxWk	ad	Unswitched memory B cell %lymphocyte	Inverse variance weighted	3	0.00135598	0.112635	0.990395	-0.219409	0.222121	1.00136	0.802993	1.24872	0.996095
ebi-a-GCST90001433	BdAkqT	ad	IgD- CD27- B cell %lymphocyte	Inverse variance weighted	2	0.023507	0.0276887	0.395894	-0.0307627	0.0777768	1.02379	0.969706	1.08088	0.717794
ebi-a-GCST90001434	Axw6QC	ad	Switched memory B cell %lymphocyte	Inverse variance weighted	3	0.0180021	0.115935	0.876602	-0.20923	0.245234	1.01817	0.811209	1.27792	0.92422
ebi-a-GCST90001436	UgPNXO	ad	Memory B cell %lymphocyte	Inverse variance weighted	2	0.0980407	0.207502	0.636583	-0.308663	0.504744	1.10301	0.734428	1.65656	0.836372
ebi-a-GCST90001439	j2IWvK	ad	IgD+ CD24+ B cell %lymphocyte	Inverse variance weighted	2	0.0657982	0.170878	0.700193	-0.269122	0.400718	1.06801	0.76405	1.4929	0.868212
ebi-a-GCST90001442	erehYt	ad	CD24+ CD27+ B cell %lymphocyte	Inverse variance weighted	3	0.110552	0.130641	0.397428	-0.145505	0.366609	1.11689	0.864585	1.44283	0.717794
ebi-a-GCST90001450	lFzJXO	ad	CD62L- monocyte Absolute Count	Inverse variance weighted	4	-0.00559258	0.0352292	0.873867	-0.0746418	0.0634567	0.994423	0.928076	1.06551	0.923617
ebi-a-GCST90001451	fbksmE	ad	CD62L- monocyte %monocyte	Inverse variance weighted	3	0.00895745	0.0212676	0.673626	-0.0327271	0.050642	1.009	0.967803	1.05195	0.858621
ebi-a-GCST90001458	YG2GQg	ad	Myeloid Dendritic Cell Absolute Count	Inverse variance weighted	5	0.0249626	0.0275687	0.365217	-0.029072	0.0789971	1.02528	0.971347	1.0822	0.705646
ebi-a-GCST90001459	SK0L4r	ad	Myeloid Dendritic Cell %Dendritic Cell	Inverse variance weighted	2	0.0405273	0.0192999	0.0357404	0.00269945	0.0783551	1.04136	1.0027	1.08151	0.210221
ebi-a-GCST90001461	ljA0UQ	ad	Dendritic Cell Absolute Count	Inverse variance weighted	2	0.0228904	0.0594918	0.700411	-0.0937136	0.139494	1.02315	0.910544	1.14969	0.868212
ebi-a-GCST90001462	NY4XdH	ad	CD62L- Dendritic Cell Absolute Count	Inverse variance weighted	4	0.0250371	0.0274039	0.360909	-0.0286744	0.0787487	1.02535	0.971733	1.08193	0.705237
ebi-a-GCST90001463	qIqsZF	ad	CD62L- Dendritic Cell %Dendritic Cell	Inverse variance weighted	3	-0.0434471	0.0349496	0.213819	-0.111948	0.0250542	0.957483	0.89409	1.02537	0.58526
ebi-a-GCST90001464	8VmkKc	ad	CD86+ myeloid Dendritic Cell Absolute Count	Inverse variance weighted	4	0.0229716	0.0216817	0.289376	-0.0195245	0.0654677	1.02324	0.980665	1.06766	0.648011
ebi-a-GCST90001465	3E78En	ad	CD86+ myeloid Dendritic Cell %Dendritic Cell	Inverse variance weighted	4	0.0257971	0.0208798	0.216642	-0.0151272	0.0667214	1.02613	0.984987	1.069	0.585678
ebi-a-GCST90001468	VomKYe	ad	CD62L- myeloid Dendritic Cell Absolute Count	Inverse variance weighted	6	0.0208	0.0201122	0.301042	-0.0186198	0.0602199	1.02102	0.981552	1.06207	0.655841
ebi-a-GCST90001469	4FtSit	ad	CD62L- myeloid Dendritic Cell %Dendritic Cell	Inverse variance weighted	7	0.00930848	0.0154499	0.546845	-0.0209733	0.0395902	1.00935	0.979245	1.04038	0.795009
ebi-a-GCST90001470	w4WQcG	ad	CD62L- plasmacytoid Dendritic Cell Absolute Count	Inverse variance weighted	2	-0.00109392	0.0302117	0.971116	-0.0603088	0.058121	0.998907	0.941474	1.05984	0.989658
ebi-a-GCST90001471	A1tSgF	ad	CD62L- plasmacytoid Dendritic Cell %Dendritic Cell	Inverse variance weighted	3	-0.0281511	0.0283809	0.321245	-0.0837778	0.0274755	0.972241	0.919636	1.02786	0.659379
ebi-a-GCST90001472	oGolpf	ad	CD62L- CD86+ myeloid Dendritic Cell Absolute Count	Inverse variance weighted	5	0.0143379	0.016471	0.384029	-0.0179452	0.046621	1.01444	0.982215	1.04772	0.717794
ebi-a-GCST90001473	a8ZHVl	ad	CD62L- CD86+ myeloid Dendritic Cell %Dendritic Cell	Inverse variance weighted	6	0.00987822	0.0161378	0.540461	-0.0217519	0.0415083	1.00993	0.978483	1.04238	0.795009
ebi-a-GCST90001474	nccBnQ	ad	Plasmacytoid Dendritic Cell %Dendritic Cell	Inverse variance weighted	2	-0.127553	0.0414435	0.00208563	-0.208782	-0.0463238	0.880247	0.811572	0.954733	0.0377198
ebi-a-GCST90001475	bdWjjD	ad	HLA DR++ monocyte %monocyte	Inverse variance weighted	3	-0.0701569	0.0242105	0.00375806	-0.11761	-0.0227043	0.932248	0.889043	0.977552	0.0487337
ebi-a-GCST90001477	QfCoEi	ad	HLA DR++ monocyte Absolute Count	Inverse variance weighted	2	-0.0126294	0.0630603	0.841266	-0.136228	0.110969	0.98745	0.872644	1.11736	0.921508
ebi-a-GCST90001478	BywUH6	ad	CD4 regulatory T cell %CD4+ T cell	Inverse variance weighted	2	-0.00711218	0.0433106	0.869563	-0.0920009	0.0777765	0.992913	0.912104	1.08088	0.923617
ebi-a-GCST90001480	g7H8xO	ad	Resting CD4 regulatory T cell Absolute Count	Inverse variance weighted	6	0.0253882	0.00969383	0.00881857	0.00638832	0.0443881	1.02571	1.00641	1.04539	0.0753106
ebi-a-GCST90001481	cgQ95v	ad	Resting CD4 regulatory T cell %CD4 regulatory T cell	Inverse variance weighted	15	0.0178731	0.005146	0.000514	0.00778694	0.0279592	1.01803	1.00782	1.02835	0.015677
ebi-a-GCST90001482	zi7rhx	ad	Resting CD4 regulatory T cell %CD4+ T cell	Inverse variance weighted	10	0.0215651	0.00629233	0.00061	0.00923216	0.0338981	1.0218	1.00927	1.03448	0.0168131
ebi-a-GCST90001483	mLpXYj	ad	CD39+ resting CD4 regulatory T cell Absolute Count	Inverse variance weighted	18	0.0158841	0.00752216	0.0347178	0.00114062	0.0306275	1.01601	1.00114	1.0311	0.208796
ebi-a-GCST90001484	C4f0zM	ad	CD39+ resting CD4 regulatory T cell %resting CD4 regulatory T cell	Inverse variance weighted	15	0.0150767	0.00768724	0.0498487	9.69e-06	0.0301437	1.01519	1.00001	1.0306	0.269435
ebi-a-GCST90001485	Jm1uoi	ad	CD39+ resting CD4 regulatory T cell %CD4 regulatory T cell	Inverse variance weighted	22	0.0172134	0.00602807	0.00429633	0.0053984	0.0290284	1.01736	1.00541	1.02945	0.0524152
ebi-a-GCST90001486	uOTe3c	ad	Activated CD4 regulatory T cell Absolute Count	Inverse variance weighted	3	-0.0339921	0.0147951	0.021589	-0.0629905	-0.00499368	0.966579	0.938952	0.995019	0.13759
ebi-a-GCST90001487	eAPiZv	ad	Activated CD4 regulatory T cell %CD4 regulatory T cell	Inverse variance weighted	5	-0.0119769	0.010758	0.265576	-0.0330625	0.00910867	0.988094	0.967478	1.00915	0.630004
ebi-a-GCST90001489	CvSRlD	ad	CD39+ activated CD4 regulatory T cell Absolute Count	Inverse variance weighted	13	0.0140648	0.00900655	0.118379	-0.00358808	0.0317176	1.01416	0.996418	1.03223	0.407643
ebi-a-GCST90001491	WqLxa5	ad	CD39+ activated CD4 regulatory T cell %CD4 regulatory T cell	Inverse variance weighted	12	0.0122399	0.00860693	0.154998	-0.0046297	0.0291095	1.01232	0.995381	1.02954	0.476146
ebi-a-GCST90001492	H7Dc2t	ad	Secreting CD4 regulatory T cell Absolute Count	Inverse variance weighted	6	-0.0309884	0.0083319	0.0002	-0.0473189	-0.0146578	0.969487	0.953783	0.985449	0.0112621
ebi-a-GCST90001493	1UQy5C	ad	Secreting CD4 regulatory T cell %CD4 regulatory T cell	Inverse variance weighted	11	-0.0226507	0.00570625	7.2e-05	-0.0338349	-0.0114664	0.977604	0.966731	0.988599	0.00710243
ebi-a-GCST90001494	FXLdfU	ad	Secreting CD4 regulatory T cell %CD4+ T cell	Inverse variance weighted	10	-0.0178589	0.00632532	0.00475178	-0.0302565	-0.00546126	0.9823	0.970197	0.994554	0.0548381
ebi-a-GCST90001495	ZsQiEt	ad	CD39+ secreting CD4 regulatory T cell Absolute Count	Inverse variance weighted	16	0.01367	0.007638	0.0734956	-0.00130044	0.0286405	1.01376	0.9987	1.02905	0.328969
ebi-a-GCST90001496	5zt7zw	ad	CD39+ secreting CD4 regulatory T cell %secreting CD4 regulatory T cell	Inverse variance weighted	14	-0.00213335	0.01314	0.871026	-0.0278877	0.023621	0.997869	0.972498	1.0239	0.923617
ebi-a-GCST90001497	PBUuH6	ad	CD39+ secreting CD4 regulatory T cell %CD4 regulatory T cell	Inverse variance weighted	13	0.00218098	0.013072	0.867493	-0.0234402	0.0278021	1.00218	0.976832	1.02819	0.923617
ebi-a-GCST90001499	c4hqeu	ad	Activated & resting CD4 regulatory T cell %CD4 regulatory T cell	Inverse variance weighted	11	0.0223321	0.00562563	7.2e-05	0.0113058	0.0333583	1.02258	1.01137	1.03392	0.00710243
ebi-a-GCST90001500	lmswJj	ad	Activated & resting CD4 regulatory T cell %CD4+ T cell	Inverse variance weighted	6	0.0240414	0.00934231	0.0100708	0.00573048	0.0423523	1.02433	1.00575	1.04326	0.0811361
ebi-a-GCST90001501	B8bF2c	ad	Activated & secreting CD4 regulatory T cell Absolute Count	Inverse variance weighted	6	-0.0280538	0.00820709	0.00063	-0.0441397	-0.0119679	0.972336	0.95682	0.988103	0.0168131
ebi-a-GCST90001502	RSG0Vb	ad	Activated & secreting CD4 regulatory T cell %CD4 regulatory T cell	Inverse variance weighted	15	-0.0208829	0.00536698	9.98e-05	-0.0314021	-0.0103636	0.979334	0.969086	0.98969	0.00710243
ebi-a-GCST90001503	ZIMebt	ad	Activated & secreting CD4 regulatory T cell %CD4+ T cell	Inverse variance weighted	11	-0.0161874	0.00656011	0.0136044	-0.0290452	-0.00332953	0.983943	0.971373	0.996676	0.0984591
ebi-a-GCST90001507	o5PdKm	ad	CD25++ CD45RA+ CD4 not regulatory T cell Absolute Count	Inverse variance weighted	6	0.0204412	0.00792675	0.00991534	0.00490482	0.0359777	1.02065	1.00492	1.03663	0.0811361
ebi-a-GCST90001508	4yUDad	ad	CD25++ CD45RA+ CD4 not regulatory T cell %CD4+ T cell	Inverse variance weighted	9	0.0208149	0.00677479	0.00212343	0.00753629	0.0340935	1.02103	1.00756	1.03468	0.0377198
ebi-a-GCST90001509	vamPqZ	ad	CD25++ CD45RA+ CD4 not regulatory T cell %T cell	Inverse variance weighted	8	0.021344	0.00736736	0.00376631	0.00690394	0.035784	1.02157	1.00693	1.03643	0.0487337
ebi-a-GCST90001510	YUP1j0	ad	CD25++ CD45RA- CD4 not regulatory T cell Absolute Count	Inverse variance weighted	4	-0.0346578	0.0118516	0.00345211	-0.0578869	-0.0114287	0.965936	0.943757	0.988636	0.04755
ebi-a-GCST90001511	pdwNGn	ad	CD25++ CD45RA- CD4 not regulatory T cell %CD4+ T cell	Inverse variance weighted	6	-0.0267274	0.0086321	0.00195966	-0.0436463	-0.00980847	0.973627	0.957292	0.990239	0.0377198
ebi-a-GCST90001512	37xpFN	ad	CD25++ CD45RA- CD4 not regulatory T cell %T cell	Inverse variance weighted	5	-0.0365431	0.0100423	0.000274	-0.056226	-0.0168603	0.964116	0.945325	0.983281	0.0116998
ebi-a-GCST90001514	60Q6a7	ad	Hematopoietic Stem Cell Absolute Count	Inverse variance weighted	3	0.0158019	0.0137004	0.248748	-0.0110508	0.0426546	1.01593	0.98901	1.04358	0.616311
ebi-a-GCST90001515	FF8IeS	ad	Immature Myeloid-Derived Suppressor Cells Absolute Count	Inverse variance weighted	2	0.0795114	0.0311934	0.0108036	0.0183725	0.14065	1.08276	1.01854	1.15102	0.0854288
ebi-a-GCST90001516	dV4Dim	ad	Immature Myeloid-Derived Suppressor Cells %CD33dim HLA DR- CD66b-	Inverse variance weighted	2	0.062926	0.0788619	0.424913	-0.0916433	0.217495	1.06495	0.912431	1.24296	0.720116
ebi-a-GCST90001520	f7PAQ9	ad	CD33+ HLA DR+ CD14dim Absolute Count	Inverse variance weighted	2	0.0735032	0.0532027	0.167104	-0.0307741	0.17778	1.07627	0.969695	1.19456	0.482118
ebi-a-GCST90001524	KHkzCm	ad	Granulocytic Myeloid-Derived Suppressor Cells Absolute Count	Inverse variance weighted	2	0.117598	0.0301958	9.84e-05	0.0584138	0.176781	1.12479	1.06015	1.19337	0.00710243
ebi-a-GCST90001526	p85EKM	ad	CD33dim HLA DR+ CD11b+ %CD33dim HLA DR+	Inverse variance weighted	2	0.0243991	0.0132492	0.065541	-0.00156937	0.0503676	1.0247	0.998432	1.05166	0.315979
ebi-a-GCST90001527	c5oxIc	ad	CD33dim HLA DR+ CD11b- Absolute Count	Inverse variance weighted	2	9.46e-05	0.0241428	0.996873	-0.0472253	0.0474145	1.00009	0.953872	1.04856	0.996873
ebi-a-GCST90001528	A6DD9r	ad	CD33dim HLA DR+ CD11b- %CD33dim HLA DR+	Inverse variance weighted	2	-0.024372	0.0132501	0.0658597	-0.0503422	0.00159827	0.975923	0.950904	1.0016	0.315979
ebi-a-GCST90001530	QrMnyU	ad	Monocytic Myeloid-Derived Suppressor Cells Absolute Count	Inverse variance weighted	4	0.0369775	0.0266537	0.165342	-0.0152639	0.0892188	1.03767	0.984852	1.09332	0.480279
ebi-a-GCST90001531	ElzL7R	ad	CD33dim HLA DR- Absolute Count	Inverse variance weighted	2	0.002009	0.00970008	0.835922	-0.0170032	0.0210212	1.00201	0.983141	1.02124	0.921508
ebi-a-GCST90001532	WwjAjA	ad	Basophil Absolute Count	Inverse variance weighted	3	0.0158821	0.0192637	0.40968	-0.0218748	0.053639	1.01601	0.978363	1.0551	0.717794
ebi-a-GCST90001533	tpuwaW	ad	Basophil %CD33dim HLA DR- CD66b-	Inverse variance weighted	3	0.050343	0.0202572	0.0129481	0.010639	0.0900471	1.05163	1.0107	1.09423	0.0953246
ebi-a-GCST90001534	RIOuU5	ad	CD45RA- CD4+ T cell Absolute Count	Inverse variance weighted	2	-0.033192	0.0236158	0.159872	-0.079479	0.0130949	0.967353	0.923597	1.01318	0.479943
ebi-a-GCST90001535	mC0NXX	ad	CD45RA- CD4+ T cell %CD4+ T cell	Inverse variance weighted	6	-0.0283194	0.010314	0.00603767	-0.0485349	-0.008104	0.972078	0.952624	0.991929	0.0661047
ebi-a-GCST90001536	OD6kJq	ad	CD45RA- CD4+ T cell %T cell	Inverse variance weighted	4	-0.0284613	0.0133855	0.0334806	-0.0546969	-0.00222564	0.97194	0.946772	0.997777	0.204232
ebi-a-GCST90001540	JtHLvY	ad	Naive CD4+ T cell Absolute Count	Inverse variance weighted	2	-0.00209105	0.0845262	0.980264	-0.167762	0.16358	0.997911	0.845555	1.17772	0.996095
ebi-a-GCST90001541	dGg8BS	ad	Naive CD4+ T cell %CD4+ T cell	Inverse variance weighted	2	0.0431123	0.0240437	0.0729607	-0.00401346	0.090238	1.04406	0.995995	1.09443	0.328969
ebi-a-GCST90001543	vLITLE	ad	Effector Memory CD4+ T cell %CD4+ T cell	Inverse variance weighted	2	-0.0257956	0.0443145	0.560497	-0.112652	0.0610608	0.974534	0.893461	1.06296	0.804989
ebi-a-GCST90001544	4XYWiY	ad	Effector Memory CD4+ T cell %T cell	Inverse variance weighted	4	-0.00834323	0.0229331	0.716002	-0.0532921	0.0366056	0.991691	0.948103	1.03728	0.871034
ebi-a-GCST90001546	vsmitp	ad	Terminally Differentiated CD4+ T cell %CD4+ T cell	Inverse variance weighted	3	0.0632024	0.0254251	0.0129249	0.0133693	0.113036	1.06524	1.01346	1.11967	0.0953246
ebi-a-GCST90001547	2TwTQI	ad	Terminally Differentiated CD4+ T cell %T cell	Inverse variance weighted	4	0.030865	0.0312548	0.323385	-0.0303945	0.0921245	1.03135	0.970063	1.0965	0.659379
ebi-a-GCST90001551	313Wa5	ad	Naive CD8+ T cell Absolute Count	Inverse variance weighted	2	0.0177708	0.0481277	0.711947	-0.0765596	0.112101	1.01793	0.926298	1.11863	0.868576
ebi-a-GCST90001553	CBKYqT	ad	Naive CD8+ T cell %T cell	Inverse variance weighted	2	-0.00142636	0.00518185	0.783116	-0.0115828	0.00873006	0.998575	0.988484	1.00877	0.902684
ebi-a-GCST90001554	qfr054	ad	Effector Memory CD8+ T cell Absolute Count	Inverse variance weighted	2	-0.00141679	0.018339	0.93842	-0.0373613	0.0345277	0.998584	0.963328	1.03513	0.966782
ebi-a-GCST90001555	LzwxTZ	ad	Effector Memory CD8+ T cell %CD8+ T cell	Inverse variance weighted	6	-0.0222353	0.0090945	0.0144884	-0.0400605	-0.0044101	0.97801	0.960731	0.9956	0.103109
ebi-a-GCST90001556	9keMob	ad	Effector Memory CD8+ T cell %T cell	Inverse variance weighted	2	-0.0135791	0.0180957	0.45301	-0.0490467	0.0218884	0.986513	0.952137	1.02213	0.736056
ebi-a-GCST90001558	xuadsh	ad	Terminally Differentiated CD8+ T cell %CD8+ T cell	Inverse variance weighted	5	0.0274869	0.0164745	0.0952255	-0.00480305	0.0597768	1.02787	0.995208	1.0616	0.356678
ebi-a-GCST90001559	SB6mDE	ad	Terminally Differentiated CD8+ T cell %T cell	Inverse variance weighted	2	0.0418766	0.022124	0.0583829	-0.00148648	0.0852397	1.04277	0.998515	1.08898	0.29678
ebi-a-GCST90001560	usThBK	ad	CD45RA+ CD8+ T cell Absolute Count	Inverse variance weighted	3	-0.0219091	0.0713198	0.758695	-0.161696	0.117878	0.978329	0.8507	1.12511	0.88608
ebi-a-GCST90001561	Z0G3iE	ad	CD45RA+ CD8+ T cell %CD8+ T cell	Inverse variance weighted	7	0.0172065	0.0065615	0.00873269	0.00434598	0.0300671	1.01736	1.00436	1.03052	0.0753106
ebi-a-GCST90001562	fGgyZ4	ad	CD45RA+ CD8+ T cell %T cell	Inverse variance weighted	4	0.0317583	0.0166353	0.0562504	-0.000847	0.0643636	1.03227	0.999153	1.06648	0.291191
ebi-a-GCST90001569	TdECnO	ad	Effector Memory CD4-CD8- T cell Absolute Count	Inverse variance weighted	4	-0.0330839	0.0332272	0.319402	-0.0982093	0.0320415	0.967457	0.906459	1.03256	0.659379
ebi-a-GCST90001570	sP6CaK	ad	Effector Memory CD4-CD8- T cell %CD4-CD8- T cell	Inverse variance weighted	4	-0.0161176	0.0114911	0.16073	-0.0386402	0.00640493	0.984012	0.962097	1.00643	0.479943
ebi-a-GCST90001571	R9ufP9	ad	Effector Memory CD4-CD8- T cell %T cell	Inverse variance weighted	4	-0.0537389	0.0329013	0.102398	-0.118225	0.0107476	0.94768	0.888496	1.01081	0.370541
ebi-a-GCST90001573	puZeuK	ad	Terminally Differentiated CD4-CD8- T cell %CD4-CD8- T cell	Inverse variance weighted	3	0.0177895	0.01229	0.147761	-0.00629879	0.0418778	1.01795	0.993721	1.04277	0.463927
ebi-a-GCST90001574	rjPTCU	ad	Terminally Differentiated CD4-CD8- T cell %T cell	Inverse variance weighted	4	-0.00680494	0.0291804	0.815604	-0.0639986	0.0503887	0.993218	0.938006	1.05168	0.911851
ebi-a-GCST90001580	xyiNvj	ad	CD14+ CD16+ monocyte Absolute Count	Inverse variance weighted	2	-0.0308509	0.031466	0.326863	-0.0925242	0.0308224	0.96962	0.911627	1.0313	0.659379
ebi-a-GCST90001581	JaYMBL	ad	CD14- CD16- Absolute Count	Inverse variance weighted	3	-0.0124471	0.0507502	0.806253	-0.111917	0.0870232	0.98763	0.894118	1.09092	0.910889
ebi-a-GCST90001582	zjbOyn	ad	CD14+ CD16- monocyte Absolute Count	Inverse variance weighted	3	-0.0460178	0.0449495	0.305945	-0.134119	0.0420832	0.955025	0.874486	1.04298	0.659379
ebi-a-GCST90001585	f0nA19	ad	CD14+ CD16+ monocyte %monocyte	Inverse variance weighted	2	-0.0292423	0.027988	0.296109	-0.0840988	0.0256143	0.971181	0.91934	1.02595	0.654447
ebi-a-GCST90001588	GajeGJ	ad	T/B cell	Inverse variance weighted	2	-0.101183	0.183051	0.580431	-0.459963	0.257598	0.903768	0.631307	1.29382	0.813145
ebi-a-GCST90001592	3MO8rE	ad	CD8+ T cell Absolute Count	Inverse variance weighted	3	-0.0157243	0.0565968	0.781142	-0.126654	0.0952054	0.984399	0.881038	1.09988	0.902684
ebi-a-GCST90001594	sTRm3I	ad	CD4+CD8+ T cell Absolute Count	Inverse variance weighted	2	0.0373059	0.0264768	0.158835	-0.0145887	0.0892005	1.03801	0.985517	1.0933	0.479943
ebi-a-GCST90001596	wKWIUN	ad	CD8dim T cell Absolute Count	Inverse variance weighted	4	0.00477466	0.0336223	0.887073	-0.061125	0.0706743	1.00479	0.940706	1.07323	0.930664
ebi-a-GCST90001597	Q4qTY6	ad	CD8dim T cell %T cell	Inverse variance weighted	3	-0.00258617	0.0354703	0.941877	-0.0721079	0.0669355	0.997417	0.930431	1.06923	0.966782
ebi-a-GCST90001598	z94DRy	ad	CD4-CD8- T cell Absolute Count	Inverse variance weighted	2	-0.0321408	0.0532118	0.545833	-0.136436	0.0721544	0.96837	0.872462	1.07482	0.795009
ebi-a-GCST90001599	7sy6SK	ad	CD4-CD8- T cell %T cell	Inverse variance weighted	3	-0.035003	0.04376	0.423777	-0.120773	0.0507666	0.965603	0.886235	1.05208	0.720116
ebi-a-GCST90001603	O3A0FD	ad	T cell Absolute Count	Inverse variance weighted	2	-0.0952124	0.0361362	0.00841824	-0.166039	-0.0243854	0.90918	0.847013	0.97591	0.0753106
ebi-a-GCST90001604	sTLFJ3	ad	T cell %lymphocyte	Inverse variance weighted	2	0.0281483	0.0309214	0.362655	-0.0324576	0.0887542	1.02855	0.968063	1.09281	0.705237
ebi-a-GCST90001607	l0AFsY	ad	CD8+ T cell %leukocyte	Inverse variance weighted	2	-0.0508627	0.104753	0.627287	-0.256179	0.154453	0.950409	0.774004	1.16702	0.831248
ebi-a-GCST90001612	fRFj0i	ad	CD8dim T cell %leukocyte	Inverse variance weighted	3	-0.00203312	0.0374873	0.956748	-0.0755083	0.071442	0.997969	0.927272	1.07406	0.977348
ebi-a-GCST90001613	nOIUPn	ad	CD4-CD8- T cell %leukocyte	Inverse variance weighted	4	-0.0187595	0.0379025	0.620642	-0.0930484	0.0555294	0.981415	0.911149	1.0571	0.831248
ebi-a-GCST90001614	RFS3VV	ad	CD8+ and CD8dim T cell %leukocyte	Inverse variance weighted	3	-0.0619616	0.0406531	0.127471	-0.141642	0.0177186	0.939919	0.867932	1.01788	0.428582
ebi-a-GCST90001618	yLtqVh	ad	HLA DR+ T cell Absolute Count	Inverse variance weighted	4	-0.0165859	0.0293868	0.572481	-0.074184	0.0410121	0.983551	0.928501	1.04186	0.812124
ebi-a-GCST90001619	OT2s1U	ad	HLA DR+ T cell%T cell	Inverse variance weighted	3	-0.0273736	0.0185356	0.139726	-0.0637033	0.00895617	0.972998	0.938283	1.009	0.455376
ebi-a-GCST90001620	XPhmnP	ad	HLA DR+ T cell%lymphocyte	Inverse variance weighted	4	-0.0256542	0.0178688	0.151087	-0.060677	0.00936856	0.974672	0.941127	1.00941	0.470907
ebi-a-GCST90001621	SkfGaX	ad	Natural Killer T Absolute Count	Inverse variance weighted	6	0.00530225	0.0383759	0.890109	-0.0699144	0.0805189	1.00532	0.932474	1.08385	0.93156
ebi-a-GCST90001622	taPnxW	ad	Natural Killer T %T cell	Inverse variance weighted	7	0.0265296	0.0241788	0.272543	-0.0208609	0.0739201	1.02688	0.979355	1.07672	0.640091
ebi-a-GCST90001623	TyWwZb	ad	Natural Killer T %lymphocyte	Inverse variance weighted	8	0.0357947	0.020368	0.0788504	-0.00412665	0.0757161	1.03644	0.995882	1.07866	0.328969
ebi-a-GCST90001624	jtnWga	ad	HLA DR+ CD4+ T cell Absolute Count	Inverse variance weighted	2	-0.0405777	0.0278619	0.145286	-0.0951869	0.0140316	0.960235	0.909203	1.01413	0.459534
ebi-a-GCST90001626	npxM5Y	ad	HLA DR+ CD4+ T cell %lymphocyte	Inverse variance weighted	2	-0.0401827	0.0273269	0.141442	-0.0937435	0.0133781	0.960614	0.910516	1.01347	0.455376
ebi-a-GCST90001627	FvjD0X	ad	HLA DR+ CD8+ T cell Absolute Count	Inverse variance weighted	3	-0.0196728	0.0383923	0.60836	-0.0949218	0.0555761	0.980519	0.909444	1.05715	0.831248
ebi-a-GCST90001628	CZnCbS	ad	HLA DR+ CD8+ T cell %T cell	Inverse variance weighted	3	-0.022075	0.0363195	0.54332	-0.0932613	0.0491112	0.978167	0.910955	1.05034	0.795009
ebi-a-GCST90001629	891toH	ad	HLA DR+ CD8+ T cell %lymphocyte	Inverse variance weighted	2	-0.025441	0.0528123	0.630001	-0.128953	0.0780711	0.97488	0.879015	1.0812	0.831248
ebi-a-GCST90001630	CjPSdI	ad	CD8+ Natural Killer T Absolute Count	Inverse variance weighted	2	-0.0591781	0.119624	0.620812	-0.293642	0.175286	0.942539	0.745543	1.19159	0.831248
ebi-a-GCST90001633	WMki1I	ad	CD8dim Natural Killer T Absolute Count	Inverse variance weighted	7	0.00886765	0.0209404	0.671952	-0.0321756	0.0499109	1.00891	0.968337	1.05118	0.858621
ebi-a-GCST90001634	c5ihPF	ad	CD8dim Natural Killer T %T cell	Inverse variance weighted	7	0.00861522	0.0196391	0.660896	-0.0298774	0.0471079	1.00865	0.970564	1.04824	0.850008
ebi-a-GCST90001635	Qz4jAp	ad	CD8dim Natural Killer T %lymphocyte	Inverse variance weighted	8	0.00877741	0.0189711	0.6436	-0.028406	0.0459608	1.00882	0.971994	1.04703	0.838827
ebi-a-GCST90001637	SkjLbo	ad	CD4-CD8- Natural Killer T %T cell	Inverse variance weighted	8	0.00404613	0.0227861	0.859061	-0.0406147	0.0487069	1.00405	0.960199	1.04991	0.923617
ebi-a-GCST90001638	iZokvF	ad	CD4-CD8- Natural Killer T %lymphocyte	Inverse variance weighted	8	-0.00454194	0.0188462	0.809555	-0.0414804	0.0323966	0.995468	0.959368	1.03293	0.911851
ebi-a-GCST90001643	sX3IRp	ad	B cell %CD3- lymphocyte	Inverse variance weighted	3	-0.00136098	0.0183271	0.940803	-0.037282	0.03456	0.99864	0.963404	1.03516	0.966782
ebi-a-GCST90001644	t8UyqM	ad	B cell %lymphocyte	Inverse variance weighted	2	0.0657294	0.162023	0.684977	-0.251835	0.383294	1.06794	0.777373	1.46711	0.866126
ebi-a-GCST90001645	i9oIQ2	ad	Natural Killer Absolute Count	Inverse variance weighted	3	-0.0350726	0.03069	0.253122	-0.095225	0.0250799	0.965535	0.909168	1.0254	0.617618
ebi-a-GCST90001646	UwptDb	ad	Natural Killer %CD3- lymphocyte	Inverse variance weighted	5	-0.00537391	0.0156908	0.731985	-0.036128	0.0253802	0.994641	0.964517	1.0257	0.876515
ebi-a-GCST90001647	zL0NOo	ad	Natural Killer %lymphocyte	Inverse variance weighted	3	-0.0282213	0.0259921	0.277582	-0.0791658	0.0227231	0.972173	0.923887	1.02298	0.641185
ebi-a-GCST90001648	9hUFdp	ad	HLA DR+ Natural Killer Absolute Count	Inverse variance weighted	3	-0.0240299	0.0214189	0.261906	-0.066011	0.0179513	0.976257	0.936121	1.01811	0.628279
ebi-a-GCST90001649	yQSMZ4	ad	HLA DR+ Natural Killer %Natural Killer	Inverse variance weighted	5	-0.0264424	0.0148842	0.0756437	-0.0556154	0.00273063	0.973904	0.945903	1.00273	0.328969
ebi-a-GCST90001650	tyeslR	ad	HLA DR+ Natural Killer %CD3- lymphocyte	Inverse variance weighted	4	-0.029382	0.0164638	0.0743183	-0.061651	0.00288694	0.971045	0.940211	1.00289	0.328969
ebi-a-GCST90001654	8aAlun	ad	CD28- CD4-CD8- T cell Absolute Count	Inverse variance weighted	2	-0.0177534	0.050755	0.726499	-0.117233	0.0817264	0.982403	0.889378	1.08516	0.876314
ebi-a-GCST90001658	Krwzz5	ad	CD39+ CD4+ T cell %T cell	Inverse variance weighted	17	-0.0159891	0.0115092	0.164758	-0.0385472	0.00656895	0.984138	0.962186	1.00659	0.480279
ebi-a-GCST90001659	BKpbIM	ad	CD39+ CD4+ T cell %CD4+ T cell	Inverse variance weighted	15	-0.0129613	0.0119003	0.276086	-0.036286	0.0103634	0.987122	0.964364	1.01042	0.641185
ebi-a-GCST90001660	pP5Dcn	ad	CD39+ CD4+ T cell Absolute Count	Inverse variance weighted	17	-0.0123724	0.0143043	0.387069	-0.0404089	0.015664	0.987704	0.960397	1.01579	0.717794
ebi-a-GCST90001661	ZNm3YD	ad	CD28- CD8dim T cell %T cell	Inverse variance weighted	3	0.0742819	0.0435227	0.0878704	-0.0110225	0.159586	1.07711	0.989038	1.17303	0.3407
ebi-a-GCST90001663	Dm2ud0	ad	CD28- CD8dim T cell Absolute Count	Inverse variance weighted	2	0.0562662	0.0700295	0.421706	-0.0809916	0.193524	1.05788	0.922201	1.21352	0.720116
ebi-a-GCST90001664	yhX3Ox	ad	CD28+ CD45RA+ CD8dim T cell %T cell	Inverse variance weighted	8	0.0193383	0.0132259	0.143699	-0.00658449	0.0452611	1.01953	0.993437	1.0463	0.457908
ebi-a-GCST90001665	wSlFn2	ad	CD28+ CD45RA+ CD8dim T cell %CD8dim T cell	Inverse variance weighted	7	0.0156794	0.00912973	0.0859066	-0.0022149	0.0335737	1.0158	0.997788	1.03414	0.339649
ebi-a-GCST90001666	H2AkZd	ad	CD28+ CD45RA+ CD8dim T cell Absolute Count	Inverse variance weighted	8	0.00433044	0.00647665	0.503736	-0.0083638	0.0170247	1.00434	0.991671	1.01717	0.767126
ebi-a-GCST90001667	EslJm1	ad	CD28+ CD45RA- CD8dim T cell %T cell	Inverse variance weighted	4	-0.0205677	0.00872231	0.0183708	-0.0376634	-0.00347199	0.979642	0.963037	0.996534	0.124513
ebi-a-GCST90001668	StXSda	ad	CD28+ CD45RA- CD8dim T cell %CD8dim T cell	Inverse variance weighted	3	-0.0186556	0.0105385	0.0766899	-0.0393111	0.00199997	0.981517	0.961452	1.002	0.328969
ebi-a-GCST90001669	Q0WfNi	ad	CD28+ CD45RA- CD8dim T cell Absolute Count	Inverse variance weighted	4	-0.0240476	0.0089915	0.00748446	-0.041671	-0.00642428	0.976239	0.959185	0.993596	0.0743224
ebi-a-GCST90001670	UavKZX	ad	CD39+ CD8+ T cell %T cell	Inverse variance weighted	20	-0.0212352	0.0124373	0.0877518	-0.0456123	0.00314194	0.978989	0.955412	1.00315	0.3407
ebi-a-GCST90001671	ExZWJp	ad	CD39+ CD8+ T cell %CD8+ T cell	Inverse variance weighted	16	-0.02433	0.01412	0.0848721	-0.0520051	0.00334515	0.975964	0.949324	1.00335	0.338695
ebi-a-GCST90001672	lHSzKD	ad	CD39+ CD8+ T cell Absolute Count	Inverse variance weighted	21	-0.0172814	0.0120942	0.153031	-0.040986	0.00642312	0.982867	0.959843	1.00644	0.473509
ebi-a-GCST90001679	ikho7y	ad	CD25++ CD8+ T cell %T cell	Inverse variance weighted	2	-0.0161341	0.0475455	0.734354	-0.109323	0.0770551	0.983995	0.896441	1.0801	0.876515
ebi-a-GCST90001681	EvJJ4d	ad	CD25++ CD8+ T cell Absolute Count	Inverse variance weighted	3	-0.0129392	0.0324347	0.689945	-0.0765111	0.0506328	0.987144	0.926343	1.05194	0.866126
ebi-a-GCST90001684	S8JMnz	ad	CD127- CD8+ T cell Absolute Count	Inverse variance weighted	2	-0.049102	0.0964878	0.610827	-0.238218	0.140014	0.952084	0.788031	1.15029	0.831248
ebi-a-GCST90001686	KoHNTO	ad	CD28- CD8+ T cell %CD8+ T cell	Inverse variance weighted	4	0.0612923	0.0348403	0.0785377	-0.00699474	0.129579	1.06321	0.99303	1.13835	0.328969
ebi-a-GCST90001687	IGqHSv	ad	CD28- CD8+ T cell Absolute Count	Inverse variance weighted	3	-0.0243436	0.0730992	0.739118	-0.167618	0.118931	0.97595	0.845677	1.12629	0.876676
ebi-a-GCST90001688	MFiGXg	ad	CD28+ CD45RA+ CD8+ T cell %T cell	Inverse variance weighted	33	0.00227172	0.00129483	0.0793532	-0.000266	0.0048096	1.00227	0.999734	1.00482	0.328969
ebi-a-GCST90001690	TRPvJu	ad	CD28+ CD45RA+ CD8+ T cell Absolute Count	Inverse variance weighted	2	-0.0323427	0.127161	0.799229	-0.281578	0.216893	0.968175	0.754592	1.24221	0.910056
ebi-a-GCST90001691	op7QIN	ad	CD28+ CD45RA- CD8+ T cell %T cell	Inverse variance weighted	6	-0.0208124	0.00786413	0.00813288	-0.0362261	-0.00539875	0.979403	0.964422	0.994616	0.0753106
ebi-a-GCST90001692	L2jPqP	ad	CD28+ CD45RA- CD8+ T cell %CD8+ T cell	Inverse variance weighted	6	-0.0219629	0.00836658	0.00866313	-0.0383614	-0.00556436	0.978277	0.962365	0.994451	0.0753106
ebi-a-GCST90001693	OH9M7q	ad	CD28+ CD45RA- CD8+ T cell Absolute Count	Inverse variance weighted	4	-0.0264137	0.0113817	0.0203022	-0.0487218	-0.00410555	0.973932	0.952446	0.995903	0.13337
ebi-a-GCST90001694	Ri4C9R	ad	CD28- CD4-CD8- T cell %T cell	Inverse variance weighted	3	-0.0387601	0.0426021	0.362919	-0.12226	0.04474	0.961981	0.884918	1.04576	0.705237
ebi-a-GCST90001695	Ghux4b	ad	CD45RA- CD28- CD8+ T cell Absolute Count	Inverse variance weighted	131	8.87e-06	6.35e-06	0.162372	-3.57e-06	2.13e-05	1.00001	0.999996	1.00002	0.480279
ebi-a-GCST90001696	aau4wS	ad	CD45RA- CD28- CD8+ T cell %CD8+ T cell	Inverse variance weighted	11	0.000598	0.000431	0.16486	-0.000246	0.00144277	1.0006	0.999754	1.00144	0.480279
ebi-a-GCST90001697	wvoDUT	ad	CD45RA- CD28- CD8+ T cell %T cell	Inverse variance weighted	36	0.000805	0.000258	0.00178008	0.0003	0.0013106	1.00081	1.0003	1.00131	0.0373207
ebi-a-GCST90001698	NK6OFS	ad	CD45RA+ CD28- CD8+ T cell Absolute Count	Inverse variance weighted	540	5.58e-06	2.77e-06	0.0438925	1.53e-07	1.1e-05	1.00001	1	1.00001	0.249846
ebi-a-GCST90001700	RLghpz	ad	CD45RA+ CD28- CD8+ T cell %T cell	Inverse variance weighted	69	0.000335	0.000129	0.00954027	8.16e-05	0.000587	1.00033	1.00008	1.00059	0.0798764
ebi-a-GCST90001701	Bui6zd	ad	BAFF-R on CD20- CD38- B cell	Inverse variance weighted	2	0.0217166	0.0545284	0.690437	-0.0851591	0.128592	1.02195	0.918366	1.13723	0.866126
ebi-a-GCST90001702	UyR7CG	ad	BAFF-R on CD24+ CD27+ B cell	Inverse variance weighted	22	-0.00949758	0.00888593	0.285145	-0.026914	0.00791885	0.990547	0.973445	1.00795	0.647643
ebi-a-GCST90001703	sTEWnR	ad	BAFF-R on IgD+ CD24+ B cell	Inverse variance weighted	18	-0.00882279	0.00878037	0.314978	-0.0260323	0.00838674	0.991216	0.974304	1.00842	0.659379
ebi-a-GCST90001704	g2OkhP	ad	BAFF-R on IgD+ CD24- B cell	Inverse variance weighted	25	-0.00621228	0.00736888	0.399204	-0.0206553	0.00823071	0.993807	0.979557	1.00826	0.717794
ebi-a-GCST90001705	MGSGAo	ad	BAFF-R on IgD+ CD38- B cell	Inverse variance weighted	19	0.000103	0.00923891	0.991092	-0.0180051	0.0182114	1.0001	0.982156	1.01838	0.996095
ebi-a-GCST90001706	Vumo5g	ad	BAFF-R on IgD+ CD38- naive B cell	Inverse variance weighted	12	-0.00650761	0.0133836	0.626799	-0.0327395	0.0197243	0.993514	0.967791	1.01992	0.831248
ebi-a-GCST90001707	IDCSt9	ad	BAFF-R on IgD+ CD38- unswitched memory B cell	Inverse variance weighted	14	-0.00678067	0.00983086	0.490362	-0.0260492	0.0124878	0.993242	0.974287	1.01257	0.767126
ebi-a-GCST90001708	OSYpbN	ad	BAFF-R on IgD+ CD38+ B cell	Inverse variance weighted	22	-0.00516052	0.00784312	0.510559	-0.020533	0.010212	0.994853	0.979676	1.01026	0.767637
ebi-a-GCST90001709	4TXFZz	ad	BAFF-R on IgD+ CD38dim B cell	Inverse variance weighted	26	-0.00733943	0.00739637	0.321051	-0.0218363	0.00715746	0.992687	0.9784	1.00718	0.659379
ebi-a-GCST90001710	GZ1QSI	ad	BAFF-R on IgD- CD24- B cell	Inverse variance weighted	21	-0.00884695	0.00868345	0.308284	-0.0258665	0.00817262	0.991192	0.974465	1.00821	0.659379
ebi-a-GCST90001711	rO181c	ad	BAFF-R on IgD- CD27- B cell	Inverse variance weighted	22	-0.0113311	0.00886705	0.20129	-0.0287105	0.00604836	0.988733	0.971698	1.00607	0.558123
ebi-a-GCST90001712	pTTNJ3	ad	BAFF-R on IgD- CD38- B cell	Inverse variance weighted	23	-0.00769317	0.00971437	0.428397	-0.0267333	0.011347	0.992336	0.973621	1.01141	0.720116
ebi-a-GCST90001713	qvPMAY	ad	BAFF-R on IgD- CD38+ B cell	Inverse variance weighted	3	-0.0180688	0.0240971	0.453355	-0.0652991	0.0291615	0.982093	0.936787	1.02959	0.736056
ebi-a-GCST90001715	Rgbbut	ad	BAFF-R on memory B cell	Inverse variance weighted	19	-0.00733655	0.00875129	0.40184	-0.0244891	0.00981599	0.99269	0.975808	1.00986	0.717794
ebi-a-GCST90001716	WmlwfO	ad	BAFF-R on naive-mature B cell	Inverse variance weighted	25	-0.00665782	0.0075389	0.377167	-0.0214341	0.00811843	0.993364	0.978794	1.00815	0.713236
ebi-a-GCST90001717	oG6epC	ad	BAFF-R on unswitched memory B cell	Inverse variance weighted	19	-0.00760312	0.0088244	0.388907	-0.024899	0.00969271	0.992426	0.975408	1.00974	0.717794
ebi-a-GCST90001718	ArmzsW	ad	BAFF-R on switched memory B cell	Inverse variance weighted	23	-0.00966707	0.00899499	0.282501	-0.0272973	0.00796311	0.99038	0.973072	1.00799	0.645101
ebi-a-GCST90001719	hizsJo	ad	BAFF-R on IgD+ B cell	Inverse variance weighted	25	-0.00612802	0.00738893	0.406906	-0.0206103	0.00835428	0.993891	0.979601	1.00839	0.717794
ebi-a-GCST90001720	UkK0i7	ad	BAFF-R on transitional B cell	Inverse variance weighted	17	-0.00533232	0.00928357	0.565709	-0.0235281	0.0128635	0.994682	0.976747	1.01295	0.807885
ebi-a-GCST90001723	QZbzAk	ad	CD19 on CD24+ CD27+ B cell	Inverse variance weighted	2	0.0313074	0.066896	0.639784	-0.0998087	0.162424	1.0318	0.905011	1.17636	0.837999
ebi-a-GCST90001724	rcSXY5	ad	CD19 on IgD+ CD24+ B cell	Inverse variance weighted	3	0.0294385	0.0461363	0.523423	-0.0609886	0.119866	1.02988	0.940834	1.12735	0.776048
ebi-a-GCST90001725	mbMbrU	ad	CD19 on IgD+ CD24- B cell	Inverse variance weighted	3	0.00274294	0.0397853	0.945035	-0.0752363	0.0807222	1.00275	0.927524	1.08407	0.967697
ebi-a-GCST90001728	ra8uOq	ad	CD19 on IgD+ CD38- unswitched memory B cell	Inverse variance weighted	3	-0.00720689	0.0291718	0.80487	-0.0643837	0.0499699	0.992819	0.937645	1.05124	0.910889
ebi-a-GCST90001729	XSC2g4	ad	CD19 on IgD+ CD38+ B cell	Inverse variance weighted	5	-0.005071	0.017408	0.770819	-0.0391907	0.0290486	0.994942	0.961567	1.02947	0.894402
ebi-a-GCST90001730	ksHgIT	ad	CD19 on IgD+ CD38dim B cell	Inverse variance weighted	3	-0.00718841	0.0385478	0.852068	-0.0827421	0.0683652	0.992837	0.920589	1.07076	0.921758
ebi-a-GCST90001735	GU2PT1	ad	CD19 on IgD- CD38dim B cell	Inverse variance weighted	2	-0.0150259	0.0225306	0.50483	-0.0591858	0.0291341	0.985086	0.942532	1.02956	0.767126
ebi-a-GCST90001736	oW8ZB6	ad	CD19 on memory B cell	Inverse variance weighted	2	0.0407525	0.0819622	0.61904	-0.119893	0.201398	1.04159	0.887015	1.22311	0.831248
ebi-a-GCST90001737	JlLPuT	ad	CD19 on naive-mature B cell	Inverse variance weighted	2	0.107994	0.100489	0.282515	-0.0889641	0.304952	1.11404	0.914878	1.35656	0.645101
ebi-a-GCST90001738	DC0cEY	ad	CD19 on unswitched memory B cell	Inverse variance weighted	3	-0.00932511	0.0391029	0.811512	-0.0859668	0.0673165	0.990718	0.917625	1.06963	0.911851
ebi-a-GCST90001740	Mfswvn	ad	CD19 on switched memory B cell	Inverse variance weighted	2	0.0360622	0.064382	0.575392	-0.0901266	0.162251	1.03672	0.913815	1.17616	0.813145
ebi-a-GCST90001741	MVkYm6	ad	CD19 on IgD+ B cell	Inverse variance weighted	2	-0.0109014	0.048686	0.822825	-0.106326	0.0845232	0.989158	0.899131	1.0882	0.917353
ebi-a-GCST90001742	lYtTiw	ad	CD19 on transitional B cell	Inverse variance weighted	3	-0.00722868	0.0372119	0.845975	-0.0801641	0.0657067	0.992797	0.922965	1.06791	0.921508
ebi-a-GCST90001743	DyL8uW	ad	CD20 on B cell	Inverse variance weighted	3	0.0201223	0.0294893	0.495011	-0.0376767	0.0779213	1.02033	0.963024	1.08104	0.767126
ebi-a-GCST90001745	LFPYca	ad	CD20 on CD24+ CD27+ B cell	Inverse variance weighted	4	0.0665044	0.0245187	0.00667989	0.0184478	0.114561	1.06877	1.01862	1.12138	0.0679123
ebi-a-GCST90001746	qeh0kr	ad	CD20 on IgD+ CD24+ B cell	Inverse variance weighted	2	0.0875749	0.0390757	0.0250156	0.0109866	0.164163	1.09152	1.01105	1.17841	0.157083
ebi-a-GCST90001747	125171	ad	CD20 on IgD+ CD24- B cell	Inverse variance weighted	3	-0.00394528	0.0267186	0.882611	-0.0563138	0.0484232	0.996062	0.945242	1.04961	0.928263
ebi-a-GCST90001748	oIdGqK	ad	CD20 on IgD+ CD38- B cell	Inverse variance weighted	3	0.0427639	0.0347213	0.218086	-0.0252898	0.110818	1.04369	0.975027	1.11719	0.585678
ebi-a-GCST90001751	9v3Tyv	ad	CD20 on IgD+ CD38+ B cell	Inverse variance weighted	4	-0.00418468	0.0225347	0.85268	-0.0483526	0.0399833	0.995824	0.952798	1.04079	0.921758
ebi-a-GCST90001752	Jr80cm	ad	CD20 on IgD+ CD38dim B cell	Inverse variance weighted	5	-0.00813687	0.0214023	0.703806	-0.0500853	0.0338116	0.991896	0.951148	1.03439	0.868212
ebi-a-GCST90001754	xiOVII	ad	CD20 on IgD- CD27- B cell	Inverse variance weighted	4	0.0192957	0.0289106	0.5045	-0.0373691	0.0759605	1.01948	0.963321	1.07892	0.767126
ebi-a-GCST90001755	tl4mFu	ad	CD20 on IgD- CD38- B cell	Inverse variance weighted	4	0.0530051	0.0301076	0.0783195	-0.00600585	0.112016	1.05444	0.994012	1.11853	0.328969
ebi-a-GCST90001757	HdFOLd	ad	CD20 on IgD- CD38dim B cell	Inverse variance weighted	7	0.083347	0.0290546	0.00412253	0.0263999	0.140294	1.08692	1.02675	1.15061	0.0517742
ebi-a-GCST90001758	44y7VH	ad	CD20 on memory B cell	Inverse variance weighted	3	0.132614	0.0488023	0.00658042	0.0369611	0.228266	1.14181	1.03765	1.25642	0.0679123
ebi-a-GCST90001759	sDvfYS	ad	CD20 on naive-mature B cell	Inverse variance weighted	3	-0.0110558	0.0294985	0.707815	-0.0688728	0.0467612	0.989005	0.933445	1.04787	0.868212
ebi-a-GCST90001760	zuPhrD	ad	CD20 on unswitched memory B cell	Inverse variance weighted	4	0.0760494	0.0279492	0.00650878	0.0212689	0.13083	1.07902	1.0215	1.13977	0.0679123
ebi-a-GCST90001761	IxX3Yk	ad	CD20 on switched memory B cell	Inverse variance weighted	7	0.0765733	0.0302506	0.0113642	0.017282	0.135865	1.07958	1.01743	1.14553	0.0866522
ebi-a-GCST90001762	E9pG3r	ad	CD20 on IgD+ B cell	Inverse variance weighted	3	-0.0176809	0.0274973	0.520219	-0.0715756	0.0362137	0.982474	0.930926	1.03688	0.773985
ebi-a-GCST90001763	gXuHhZ	ad	CD20 on transitional B cell	Inverse variance weighted	2	0.00998031	0.0282119	0.723517	-0.045315	0.0652756	1.01003	0.955696	1.06745	0.876314
ebi-a-GCST90001765	9pictr	ad	CD24 on IgD+ CD24+ B cell	Inverse variance weighted	3	-0.029301	0.0184004	0.111292	-0.0653658	0.00676378	0.971124	0.936725	1.00679	0.386535
ebi-a-GCST90001766	Z45I4H	ad	CD24 on IgD+ CD38- B cell	Inverse variance weighted	2	-0.0508628	0.030475	0.0951178	-0.110594	0.0088683	0.950409	0.895302	1.00891	0.356678
ebi-a-GCST90001767	EMjTrG	ad	CD24 on IgD+ CD38- unswitched memory B cell	Inverse variance weighted	2	-0.0291756	0.0168385	0.083155	-0.0621791	0.00382797	0.971246	0.939715	1.00384	0.334973
ebi-a-GCST90001768	v5s54d	ad	CD24 on IgD+ CD38+ B cell	Inverse variance weighted	2	-0.00982266	0.073555	0.893765	-0.15399	0.134345	0.990225	0.85728	1.14379	0.933099
ebi-a-GCST90001769	DMLVFv	ad	CD24 on IgD- CD38- B cell	Inverse variance weighted	2	-0.0404671	0.0244825	0.0983519	-0.0884529	0.00751867	0.960341	0.915346	1.00755	0.359121
ebi-a-GCST90001771	Wku3IT	ad	CD24 on memory B cell	Inverse variance weighted	3	-0.0257762	0.0193845	0.183606	-0.0637697	0.0122174	0.974553	0.938221	1.01229	0.520517
ebi-a-GCST90001772	zUX2Vs	ad	CD24 on unswitched memory B cell	Inverse variance weighted	2	-0.0363577	0.0208213	0.0807796	-0.0771675	0.004452	0.964295	0.925735	1.00446	0.331662
ebi-a-GCST90001773	w9fCkw	ad	CD24 on switched memory B cell	Inverse variance weighted	2	-0.0317608	0.0211849	0.133817	-0.0732832	0.00976158	0.968738	0.929338	1.00981	0.442943
ebi-a-GCST90001775	Shf4sD	ad	CD25 on B cell	Inverse variance weighted	3	-0.0273322	0.0258233	0.28986	-0.077946	0.0232816	0.973038	0.925014	1.02355	0.648011
ebi-a-GCST90001777	pVErsF	ad	CD25 on CD24+ CD27+ B cell	Inverse variance weighted	3	0.0222378	0.0270008	0.410168	-0.0306837	0.0751592	1.02249	0.969782	1.07806	0.717794
ebi-a-GCST90001778	0B1JEO	ad	CD25 on IgD+ CD24+ B cell	Inverse variance weighted	2	0.0283829	0.0406656	0.485204	-0.0513218	0.108087	1.02879	0.949973	1.11415	0.767126
ebi-a-GCST90001779	Z24Y33	ad	CD25 on IgD+ CD24- B cell	Inverse variance weighted	4	-0.023218	0.0219118	0.28932	-0.0661651	0.0197291	0.977049	0.935976	1.01992	0.648011
ebi-a-GCST90001780	LeIx66	ad	CD25 on IgD+ CD38- B cell	Inverse variance weighted	2	-0.0448679	0.0337778	0.18407	-0.111072	0.0213365	0.956124	0.894874	1.02157	0.520517
ebi-a-GCST90001781	JQLsWq	ad	CD25 on IgD+ CD38- naive B cell	Inverse variance weighted	2	-0.0310581	0.0283227	0.272826	-0.0865707	0.0244545	0.969419	0.917071	1.02476	0.640091
ebi-a-GCST90001783	RDvlDQ	ad	CD25 on IgD+ CD38+ B cell	Inverse variance weighted	2	-0.0374308	0.037351	0.316278	-0.110639	0.0357772	0.963261	0.895262	1.03642	0.659379
ebi-a-GCST90001784	RHDFjB	ad	CD25 on IgD+ CD38dim B cell	Inverse variance weighted	3	-0.00999799	0.0218697	0.647554	-0.0528625	0.0328666	0.990052	0.94851	1.03341	0.840443
ebi-a-GCST90001785	7pPX5G	ad	CD25 on IgD- CD24- B cell	Inverse variance weighted	2	0.0597495	0.226762	0.792173	-0.384705	0.504204	1.06157	0.680651	1.65567	0.907379
ebi-a-GCST90001786	SQrTm0	ad	CD25 on IgD- CD27- B cell	Inverse variance weighted	2	-0.0134384	0.04429	0.761572	-0.100247	0.0733701	0.986652	0.904614	1.07613	0.88608
ebi-a-GCST90001787	CD8zrZ	ad	CD25 on IgD- CD38- B cell	Inverse variance weighted	3	0.0372068	0.0230272	0.106143	-0.00792658	0.0823402	1.03791	0.992105	1.08583	0.374572
ebi-a-GCST90001789	7UNlHL	ad	CD25 on IgD- CD38dim B cell	Inverse variance weighted	3	-0.0367294	0.0221526	0.0973136	-0.0801485	0.00668966	0.963937	0.922979	1.00671	0.359121
ebi-a-GCST90001790	iyyyfx	ad	CD25 on memory B cell	Inverse variance weighted	3	0.0223861	0.0271072	0.408896	-0.0307439	0.0755162	1.02264	0.969724	1.07844	0.717794
ebi-a-GCST90001791	JcCvBn	ad	CD25 on naive-mature B cell	Inverse variance weighted	4	-0.0268073	0.0221479	0.226136	-0.0702173	0.0166027	0.973549	0.932191	1.01674	0.595764
ebi-a-GCST90001792	0whGPu	ad	CD25 on unswitched memory B cell	Inverse variance weighted	3	0.0220011	0.028825	0.445307	-0.034496	0.0784981	1.02224	0.966092	1.08166	0.728529
ebi-a-GCST90001793	ajzTpO	ad	CD25 on switched memory B cell	Inverse variance weighted	2	-0.0379947	0.023364	0.103905	-0.0837881	0.00779867	0.962718	0.919626	1.00783	0.372836
ebi-a-GCST90001794	MSZabd	ad	CD25 on IgD+ B cell	Inverse variance weighted	2	-0.0302605	0.0298473	0.310659	-0.0887612	0.0282403	0.970193	0.915064	1.02864	0.659379
ebi-a-GCST90001798	YdA0Qm	ad	CD27 on CD24+ CD27+ B cell	Inverse variance weighted	11	0.0020746	0.0163602	0.899093	-0.0299914	0.0341406	1.00208	0.970454	1.03473	0.936372
ebi-a-GCST90001800	SisK8F	ad	CD27 on IgD+ CD24+ B cell	Inverse variance weighted	7	0.00734485	0.0217399	0.735475	-0.0352653	0.049955	1.00737	0.965349	1.05122	0.876515
ebi-a-GCST90001801	zJJZ7T	ad	CD27 on IgD+ CD38- unswitched memory B cell	Inverse variance weighted	4	0.00413445	0.0212406	0.845668	-0.0374971	0.045766	1.00414	0.963197	1.04683	0.921508
ebi-a-GCST90001802	rwzTLV	ad	CD27 on IgD- CD38- B cell	Inverse variance weighted	7	-0.00375896	0.0161323	0.815754	-0.0353782	0.0278603	0.996248	0.96524	1.02825	0.911851
ebi-a-GCST90001803	5aqxYF	ad	CD27 on IgD- CD38+ B cell	Inverse variance weighted	2	0.0309873	0.0469587	0.509328	-0.0610517	0.123026	1.03147	0.940775	1.13091	0.767637
ebi-a-GCST90001804	1Vq6c5	ad	CD27 on IgD- CD38dim B cell	Inverse variance weighted	9	-0.00282075	0.0173328	0.870722	-0.036793	0.0311515	0.997183	0.963876	1.03164	0.923617
ebi-a-GCST90001805	6XfMp6	ad	CD27 on memory B cell	Inverse variance weighted	8	0.0128506	0.0178516	0.471614	-0.0221385	0.0478396	1.01293	0.978105	1.049	0.751414
ebi-a-GCST90001806	xVsu9U	ad	CD27 on unswitched memory B cell	Inverse variance weighted	10	0.00661894	0.0166039	0.69016	-0.0259247	0.0391626	1.00664	0.974408	1.03994	0.866126
ebi-a-GCST90001808	mulhyR	ad	CD27 on switched memory B cell	Inverse variance weighted	10	-0.000168	0.0156576	0.99143	-0.0308571	0.0305207	0.999832	0.969614	1.03099	0.996095
ebi-a-GCST90001811	4ZpEU6	ad	CD38 on IgD+ CD24- B cell	Inverse variance weighted	2	-0.00395609	0.0322109	0.902251	-0.0670895	0.0591773	0.996052	0.935112	1.06096	0.937375
ebi-a-GCST90001812	GW4Fna	ad	CD38 on IgD+ CD38+ B cell	Inverse variance weighted	2	0.0448353	0.0363283	0.217139	-0.0263681	0.116039	1.04586	0.973976	1.12304	0.585678
[truncated: 175 more rows]

## Sheet: Supplementary Table 4
Supplementary Table 4:FDR-adjusted MR results of all immune traits identified in Weighted median method using the European Alzheimer’s and Dementia Biobank (EADB).
[truncated: 291 more rows]

[truncated: 5 more sheets: Supplementary Table 5, Supplementary Table 6, Supplementary Table 7, Supplementary Table 8, Supplementary Table 9]
